# Supplementary material for: Synthesis of structurally diverse pyrazolo[1,2-a]pyrazolones based on the selective C–H bond alkenylation–annulation of 1-arylpyrazolidinones with allenyl acetates
Source: Royal Society of Chemistry journal article supplement (doi:10.1039/d4qo00701h), 2024-01-01
Supplement: d4qo00701h1.pdf [file d4qo00701h1.pdf]

## Supporting Information

### **Synthesis of Structurally Diverse Pyrazolo[1,2-*a*]pyrazolones Based on Selective C–H Bond Alkenylation-Annulation of 1-Arylpyrazolidinones with Allenyl Acetates**

Yongdi Xin<sup>a</sup>, Qianting Zhou<sup>a</sup>, Bin Li<sup>a</sup>, Biao Cheng,<sup>b</sup> Xinying Zhang<sup>a,\*</sup>, Xuesen Fan<sup>a,\*</sup>

*<sup>a</sup>State Key Laboratory of Antiviral Drugs, Pingyuan Laboratory, Key Laboratory of Green Chemical Media and Reactions, Ministry of Education, School of Chemistry and Chemical Engineering, Henan Normal University, Xinxiang 453007, China*

*<sup>b</sup>College of Tobacco Science, Henan Agricultural University, Zhengzhou 450046, China*

## Table of Contents

|             |                                                |           |
|-------------|------------------------------------------------|-----------|
| <b>I</b>    | General experimental information               | S3        |
| <b>II</b>   | Experimental procedures and spectroscopic data | S4-S34    |
| <b>III</b>  | Mechanistic studies                            | S35-S38   |
| <b>IV</b>   | References                                     | S39       |
| <b>V</b>    | NMR spectra of <b>3a-3ee</b>                   | S40-S77   |
| <b>VI</b>   | NMR spectra of <b>4a-4t</b>                    | S78-S103  |
| <b>VII</b>  | NMR spectra of <b>5a-5d</b>                    | S104-S107 |
| <b>VIII</b> | NMR spectra of <b>6a-6e</b>                    | S108-S112 |
| <b>IX</b>   | NMR spectra of <b>7a-7e</b>                    | S113-S117 |
| <b>X</b>    | NMR spectra of <b>8-9</b>                      | S118-S120 |
| <b>XI</b>   | X-ray crystal structure and data for <b>3d</b> | S121-S122 |

## I. General experimental information

Commercial reagents were used without further purification. 1-Arylpyrazolidinones **1**,<sup>[1]</sup> allenyl acetates **2**,<sup>[2]</sup> and  $[\text{RhCp}^*\text{Cl}_2]_2$ <sup>[3]</sup> were prepared based on literature procedures. Melting points were recorded with a micro melting point apparatus and uncorrected. The  $^1\text{H}$  NMR spectra were recorded at 400 MHz or 600 MHz. The  $^{13}\text{C}$  NMR spectra were recorded at 100 MHz or 150 MHz. The  $^{19}\text{F}$  NMR spectra were recorded at 565 MHz or 376 MHz. Chemical shifts were expressed in parts per million ( $\delta$ ), and were reported as s (singlet), d (doublet), t (triplet), q (quartet), dd (doublet of doublet), td (triplet of doublets), m (multiplet), etc. The coupling constants  $J$  were given in Hz. High resolution mass spectra (HRMS) were obtained via ESI-TOF mode by using a BRUKER compact mass spectrometer. All reactions were monitored by thin layer chromatography (TLC) using silica gel plates (silica gel 60 F254 0.25 mm), and components were visualized by observation under UV light (254 and 365 nm).

## II. Experimental procedures and spectroscopic data

### 1. Typical procedure for the synthesis of **3a** and spectroscopic data of **3a-3ee**

To a reaction tube equipped with a stir bar were charged with 1-phenylpyrazolidin-3-one (**1a**, 64.8 mg, 0.4 mmol), DCE (2 mL), [RhCp\*Cl<sub>2</sub>]<sub>2</sub> (3.1 mg, 0.005 mmol), NaOAc (8.2 mg, 0.1 mmol) and 1-phenylbuta-2,3-dien-1-yl acetate (**2a**, 37.6 mg, 0.2 mmol). The tube was then sealed, and the mixture was stirred at room temperature under argon for 2 h. Upon completion, it was quenched with saturated brine, and extracted with dichloromethane (10 mL × 3). The combined organic phases were dried over anhydrous Na<sub>2</sub>SO<sub>4</sub>, filtered through a pad of celite, and concentrated under reduced pressure. The residue was purified by silica gel column chromatography using petroleum ether/ethyl acetate (2:1) as eluent to afford **3a**. **3b-3ee** were obtained in a similar manner.

#### **(E)-9-Methyl-9-styryl-2,3-dihydro-1H,9H-pyrazolo[1,2-a]indazol-1-one (3a)**

Eluent: petroleum ether/ethyl acetate (2:1). Yellow solid (45.3 mg, 78%), mp 121.6-122.5 °C. <sup>1</sup>H NMR (CDCl<sub>3</sub>, 600 MHz): δ 7.35 (d, *J* = 7.2 Hz, 2H), 7.29-7.26 (m, 3H), 7.22-7.19 (m, 1H), 7.14 (d, *J* = 7.2 Hz, 1H), 7.05 (td, *J*<sub>1</sub> = 7.2 Hz, *J*<sub>2</sub> = 1.2 Hz, 1H), 6.79 (d, *J* = 7.8 Hz, 1H), 6.50 (d, *J* = 15.6 Hz, 1H), 6.43 (d, *J* = 15.6 Hz, 1H), 3.88 (td, *J*<sub>1</sub> = 9.0 Hz, *J*<sub>2</sub> = 4.8 Hz, 1H), 3.50-3.45 (m, 1H), 3.04-2.98 (m, 1H), 2.82-2.78 (m, 1H), 2.05 (s, 3H). <sup>13</sup>C{<sup>1</sup>H} NMR (CDCl<sub>3</sub>, 150 MHz): δ 164.6, 147.1, 136.2, 134.9, 130.3, 129.3, 128.9, 128.5, 127.9, 126.9, 122.9, 122.7, 110.0, 66.2, 51.2, 35.3, 24.4. HRMS (ESI) *m/z*: [M+Na]<sup>+</sup> Calcd for C<sub>19</sub>H<sub>18</sub>N<sub>2</sub>NaO 313.1311; Found 313.1308.

#### **(E)-7,9-Dimethyl-9-styryl-2,3-dihydro-1H,9H-pyrazolo[1,2-a]indazol-1-one (3b)**

Eluent: petroleum ether/ethyl acetate (2:1). Yellow solid (42.0 mg, 69%), mp 82.3-89.3 °C. <sup>1</sup>H NMR (CDCl<sub>3</sub>, 400 MHz): δ 7.30-7.28 (m, 2H), 7.21-7.17 (m, 2H), 7.15-7.10 (m, 1H), 7.00 (dd, *J*<sub>1</sub> = 8.0 Hz, *J*<sub>2</sub> = 0.8 Hz, 1H), 6.86 (s, 1H), 6.61 (d, *J* = 8.0 Hz, 1H), 6.45 (d, *J* = 16.0 Hz, 1H), 6.34 (d, *J* = 16.0 Hz, 1H), 3.77 (td, *J*<sub>1</sub> = 8.4 Hz, *J*<sub>2</sub> = 4.4 Hz, 1H), 3.38-3.31 (m, 1H), 2.96-2.87 (m, 1H), 2.74-2.67 (m, 1H), 2.26 (s, 3H), 1.96 (s, 3H).



$^{13}\text{C}\{^1\text{H}\}$  NMR ( $\text{CDCl}_3$ , 100 MHz):  $\delta$  164.8, 145.0, 136.3, 135.2, 132.7, 130.5, 129.5, 129.2, 128.6, 127.9, 126.9, 123.2, 109.9, 66.3, 51.7, 35.5, 24.5, 21.1. HRMS (ESI)  $m/z$ :  $[\text{M}+\text{Na}]^+$  Calcd for  $\text{C}_{20}\text{H}_{20}\text{N}_2\text{NaO}$  327.1468; Found 327.1472.

**(E)-7-Chloro-9-methyl-9-styryl-2,3-dihydro-1H,9H-pyrazolo[1,2-a]indazol-1-one (3c)**

Eluent: petroleum ether/ethyl acetate (2:1). Yellow solid (48.7 mg, 75%), mp 124.0-124.9 °C.  $^1\text{H}$  NMR ( $\text{CDCl}_3$ , 600 MHz):  $\delta$  7.36 (d,  $J = 7.2$  Hz, 2H), 7.28 (t,  $J = 7.2$  Hz, 2H), 7.24-7.21 (m, 2H), 7.10 (d,  $J = 1.8$  Hz, 1H), 6.70 (d,  $J = 8.4$  Hz, 1H), 6.52 (d,  $J = 15.6$  Hz, 1H), 6.38 (d,  $J = 15.6$  Hz, 1H), 3.84 (td,  $J_1 = 8.4$  Hz,  $J_2 = 4.2$  Hz, 1H), 3.47-3.43 (m, 1H), 3.02-2.96 (m, 1H), 2.82-2.78 (m, 1H), 2.03 (s, 3H).  $^{13}\text{C}\{^1\text{H}\}$  NMR ( $\text{CDCl}_3$ , 150 MHz):  $\delta$  164.7, 145.8, 136.8, 136.0, 129.8, 129.7, 129.0, 128.6, 128.1, 128.0, 126.9, 123.0, 111.0, 66.3, 51.1, 35.3, 24.4. HRMS (ESI)  $m/z$ :  $[\text{M}+\text{Na}]^+$  Calcd for  $\text{C}_{19}\text{H}_{17}\text{ClN}_2\text{NaO}$  347.0922; Found 347.0927.

**(E)-7-Bromo-9-methyl-9-styryl-2,3-dihydro-1H,9H-pyrazolo[1,2-a]indazol-1-one (3d)**

Eluent: petroleum ether/ethyl acetate (2:1). Yellow solid (49.4 mg, 67%), mp 73.5-74.2 °C.  $^1\text{H}$  NMR ( $\text{CDCl}_3$ , 600 MHz):  $\delta$  7.38-7.36 (m, 3H), 7.29 (t,  $J = 7.2$  Hz, 2H), 7.24-7.21 (m, 2H), 6.66 (d,  $J = 8.4$  Hz, 1H), 6.52 (d,  $J = 16.2$  Hz, 1H), 6.38 (d,  $J = 15.6$  Hz, 1H), 3.85 (td,  $J_1 = 9.0$  Hz,  $J_2 = 4.8$  Hz, 1H), 3.48-3.44 (m, 1H), 3.02-2.96 (m, 1H), 2.83-2.78 (m, 1H), 2.03 (s, 3H).  $^{13}\text{C}\{^1\text{H}\}$  NMR ( $\text{CDCl}_3$ , 150 MHz):  $\delta$  164.6, 146.2, 137.2, 136.0, 131.8, 129.8, 129.7, 128.6, 128.1, 127.0, 125.8, 115.2, 111.5, 66.2, 51.0, 35.3, 24.4. HRMS (ESI)  $m/z$ :  $[\text{M}+\text{Na}]^+$  Calcd for  $\text{C}_{19}\text{H}_{17}\text{BrN}_2\text{NaO}$  391.0416; Found 391.0406.

**(E)-9-Methyl-9-styryl-7-(trifluoromethyl)-2,3-dihydro-1H,9H-pyrazolo[1,2-a]indazol-1-one (3e)**

Eluent: petroleum ether/ethyl acetate (2:1). Yellow solid (47.0 mg, 66%), mp 104.8-105.6 °C.  $^1\text{H}$  NMR ( $\text{CDCl}_3$ , 600 MHz):  $\delta$  7.54 (d,  $J = 8.4$  Hz, 1H), 7.37-7.36 (m, 3H), 7.29 (t,  $J = 7.8$  Hz, 2H), 7.23 (t,  $J = 7.2$  Hz, 1H), 6.82 (d,  $J = 8.4$  Hz, 1H), 6.53 (d,  $J = 15.6$  Hz, 1H), 6.40 (d,  $J = 15.6$  Hz, 1H), 3.92 (td,  $J_1 = 9.0$  Hz,  $J_2 = 4.8$  Hz, 1H), 3.57-3.53 (m, 1H), 3.05-2.99 (m, 1H), 2.86-2.82 (m, 1H), 2.07 (s, 3H).  $^{13}\text{C}\{^1\text{H}\}$  NMR ( $\text{CDCl}_3$ , 150 MHz):  $\delta$  164.5, 149.5, 135.8, 135.6, 129.9, 129.4, 128.6, 128.1, 126.9, 126.7 (q,  $^3J_{\text{C-F}} = 3.0$  Hz), 125.0 (q,

$^2J_{C-F} = 32.1$  Hz), 124.3 (q,  $^1J_{C-F} = 269.9$  Hz), 119.9 (q,  $^3J_{C-F} = 3.3$  Hz), 109.5, 66.2, 50.1, 35.1, 24.3.  $^{19}F$  NMR (565 MHz,  $CDCl_3$ )  $\delta$ : -61.30 (s). HRMS (ESI)  $m/z$ :  $[M+Na]^+$  Calcd for  $C_{20}H_{17}F_3N_2NaO$  381.1185; Found 381.1174.

**(E)-6,9-Dimethyl-9-styryl-2,3-dihydro-1H,9H-pyrazolo[1,2-a]indazol-1-one (3f)**

Eluent: petroleum ether/ethyl acetate (2:1). Yellow solid (54.8 mg, 90%), mp 42.0-43.8 °C.  $^1H$  NMR ( $CDCl_3$ , 600 MHz):  $\delta$  7.35 (d,  $J = 7.2$  Hz, 2H), 7.28-7.26 (m, 2H), 7.20 (t,  $J = 7.2$  Hz, 1H), 7.02 (d,  $J = 8.4$  Hz, 1H), 6.87 (d,  $J = 7.2$  Hz, 1H), 6.61 (s, 1H), 6.50 (d,  $J = 16.2$  Hz, 1H), 6.44 (d,  $J = 16.2$  Hz, 1H), 3.86 (td,  $J_1 = 8.4$  Hz,  $J_2 = 4.8$  Hz, 1H), 3.47-3.43 (m, 1H), 3.02-2.97 (m, 1H), 2.81-2.76 (m, 1H), 2.37 (s, 3H), 2.04 (s, 3H).  $^{13}C\{^1H\}$  NMR ( $CDCl_3$ , 100 MHz):  $\delta$  164.6, 147.3, 139.2, 136.3, 132.2, 130.5, 129.1, 128.5, 127.8, 126.9, 123.7, 122.4, 110.7, 66.1, 51.2, 35.4, 24.6, 21.6. HRMS (ESI)  $m/z$ :  $[M+Na]^+$  Calcd for  $C_{20}H_{20}N_2NaO$  327.1468; Found 327.1471.

**(E)-6-Chloro-9-methyl-9-styryl-2,3-dihydro-1H,9H-pyrazolo[1,2-a]indazol-1-one (3g)**

Eluent: petroleum ether/ethyl acetate (2:1). Yellow solid (50.6 mg, 78%), mp 49.5-50.3 °C.  $^1H$  NMR ( $CDCl_3$ , 600 MHz):  $\delta$  7.35 (d,  $J = 7.2$  Hz, 2H), 7.27 (t,  $J = 7.8$  Hz, 2H), 7.21 (t,  $J = 7.2$  Hz, 1H), 7.04 (d,  $J = 8.4$  Hz, 1H), 7.00 (dd,  $J_1 = 7.8$  Hz,  $J_2 = 1.2$  Hz, 1H), 6.76 (d,  $J = 1.8$  Hz, 1H), 6.48 (d,  $J = 15.6$  Hz, 1H), 6.40 (d,  $J = 16.2$  Hz, 1H), 3.85 (td,  $J_1 = 9.0$  Hz,  $J_2 = 4.8$  Hz, 1H), 3.50-3.46 (m, 1H), 3.01-2.96 (m, 1H), 2.83-2.78 (m, 1H), 2.02 (s, 3H).  $^{13}C\{^1H\}$  NMR ( $CDCl_3$ , 100 MHz):  $\delta$  164.5, 148.2, 136.0, 134.7, 133.4, 129.8, 129.6, 128.6, 128.0, 126.9, 123.6, 122.8, 110.3, 66.0, 50.6, 35.2, 24.4. HRMS (ESI)  $m/z$ :  $[M+Na]^+$  Calcd for  $C_{19}H_{17}ClN_2NaO$  347.0922; Found 347.0909.

**(E)-6-Bromo-9-methyl-9-styryl-2,3-dihydro-1H,9H-pyrazolo[1,2-a]indazol-1-one (3h)**

Eluent: petroleum ether/ethyl acetate (2:1). Yellow solid (58.0 mg, 79%), mp 45.3-46.3 °C.  $^1H$  NMR ( $CDCl_3$ , 600 MHz):  $\delta$  7.34 (d,  $J = 7.8$  Hz, 2H), 7.27 (t,  $J = 7.2$  Hz, 2H), 7.21 (t,  $J = 7.2$  Hz, 1H), 7.15 (dd,  $J_1 = 8.4$  Hz,  $J_2 = 1.8$  Hz, 1H), 6.97 (d,  $J = 7.8$  Hz, 1H), 6.91 (d,  $J = 1.2$  Hz, 1H), 6.48 (d,  $J = 15.6$  Hz, 1H), 6.40 (d,  $J = 15.6$

Hz, 1H), 3.84 (td,  $J_1 = 8.4$  Hz,  $J_2 = 4.8$  Hz, 1H), 3.49-3.45 (m, 1H), 3.01-2.95 (m, 1H), 2.82-2.77 (m, 1H), 2.02 (s, 3H).  $^{13}\text{C}\{^1\text{H}\}$  NMR ( $\text{CDCl}_3$ , 150 MHz):  $\delta$  164.5, 148.4, 136.0, 134.0, 129.70, 129.67, 128.6, 128.1, 126.9, 125.7, 124.0, 122.5, 113.2, 66.1, 50.7, 35.2, 24.4. HRMS (ESI)  $m/z$ :  $[\text{M}+\text{Na}]^+$  Calcd for  $\text{C}_{19}\text{H}_{17}\text{BrN}_2\text{NaO}$  391.0416; Found 391.0428.

**(E)-5-Fluoro-9-methyl-9-styryl-2,3-dihydro-1H,9H-pyrazolo[1,2-a]indazol-1-one (3i)**

Eluent: petroleum ether/ethyl acetate (2:1). Yellow solid (31.0 mg, 50%), mp 57.4-58.3 °C.  $^1\text{H}$  NMR ( $\text{CDCl}_3$ , 600 MHz):  $\delta$  7.36-7.34 (m, 2H), 7.29-7.26 (m, 2H), 7.23-7.20 (m, 1H), 7.02-6.98 (m, 2H), 6.94-6.92 (m, 1H), 6.51 (d,  $J = 15.6$  Hz, 1H), 6.41 (d,  $J = 16.2$  Hz, 1H), 4.03-3.99 (m, 1H), 3.64-3.60 (m, 1H), 3.03-2.97 (m, 1H), 2.82-2.77 (m, 1H), 2.06 (s, 3H).  $^{13}\text{C}\{^1\text{H}\}$  NMR ( $\text{CDCl}_3$ , 150 MHz):  $\delta$  164.9, 149.0 (d,  $^1J_{\text{C-F}} = 244.2$  Hz), 138.3 (d,  $^3J_{\text{C-F}} = 3.5$  Hz), 136.0, 134.0 (d,  $^2J_{\text{C-F}} = 13.4$  Hz), 129.8, 129.6, 128.5, 128.0, 126.9, 124.1 (d,  $^3J_{\text{C-F}} = 5.6$  Hz), 118.3 (d,  $^4J_{\text{C-F}} = 3.3$  Hz), 115.8 (d,  $^2J_{\text{C-F}} = 18.2$  Hz), 66.7, 52.1 (d,  $^4J_{\text{C-F}} = 2.1$  Hz), 35.6, 24.6.  $^{19}\text{F}$  NMR (565 MHz,  $\text{CDCl}_3$ )  $\delta$ : -132.78 – -132.81 (m). HRMS (ESI)  $m/z$ :  $[\text{M}+\text{Na}]^+$  Calcd for  $\text{C}_{19}\text{H}_{17}\text{FN}_2\text{NaO}$  331.1217; Found 331.1203.

**(E)-5-Methoxy-9-methyl-9-styryl-2,3-dihydro-1H,9H-pyrazolo[1,2-a]indazol-1-one (3j)**

Eluent: petroleum ether/ethyl acetate (2:1). Yellow solid (40.8 mg, 64%), mp 73.9-74.9 °C.  $^1\text{H}$  NMR ( $\text{CDCl}_3$ , 400 MHz):  $\delta$  7.35 (d,  $J = 7.2$  Hz, 2H), 7.27 (t,  $J = 7.2$  Hz, 2H), 7.22-7.18 (m, 1H), 7.04 (t,  $J = 7.6$  Hz, 1H), 6.82 (d,  $J = 8.4$  Hz, 1H), 6.77 (d,  $J = 7.6$  Hz, 1H), 6.52 (d,  $J = 16.0$  Hz, 1H), 6.43 (d,  $J = 16.0$  Hz, 1H), 4.02 (td,  $J_1 = 8.4$  Hz,  $J_2 = 4.4$  Hz, 1H), 3.87 (s, 3H), 3.59-3.52 (m, 1H), 3.01-2.92 (m, 1H), 2.78-2.71 (m, 1H), 2.05 (s, 3H).  $^{13}\text{C}\{^1\text{H}\}$  NMR ( $\text{CDCl}_3$ , 100 MHz):  $\delta$  165.2, 146.4, 136.32, 136.26, 135.2, 130.4, 129.2, 128.5, 127.8, 126.8, 124.3, 114.8, 110.8, 66.5, 55.7, 53.0, 35.7, 24.7. HRMS (ESI)  $m/z$ :  $[\text{M}+\text{Na}]^+$  Calcd for  $\text{C}_{20}\text{H}_{20}\text{N}_2\text{NaO}_2$  343.1417; Found 343.1420.

**(E)-6,7,9-Trimethyl-9-styryl-2,3-dihydro-1H,9H-pyrazolo[1,2-a]indazol-1-one (3k)**

Eluent: petroleum ether/ethyl acetate (2:1). Yellow solid (57.4 mg, 90%), mp 136.9-137.7 °C. <sup>1</sup>H NMR (CDCl<sub>3</sub>, 600 MHz): δ 7.36-7.35 (m, 2H), 7.27-7.25 (m, 2H), 7.21-7.18 (m, 1H), 6.89 (s, 1H), 6.60 (s, 1H), 6.51 (d, *J* = 16.2 Hz, 1H), 6.42 (d, *J* = 15.6 Hz, 1H), 3.83 (td, *J*<sub>1</sub> = 8.4 Hz, *J*<sub>2</sub> = 4.8 Hz, 1H), 3.43-3.39 (m, 1H), 3.01-2.95 (m, 1H), 2.80-2.75 (m, 1H), 2.26 (s, 3H), 2.24 (s, 3H), 2.03 (s, 3H). <sup>13</sup>C{<sup>1</sup>H} NMR (CDCl<sub>3</sub>, 150 MHz): δ 164.7, 145.4, 137.5, 136.4, 132.5, 131.3, 130.6, 129.0, 128.5, 127.8, 126.9, 123.5, 111.4, 66.2, 51.8, 35.5, 24.6, 20.3, 19.7. HRMS (ESI) *m/z*: [M+Na]<sup>+</sup> Calcd for C<sub>21</sub>H<sub>22</sub>N<sub>2</sub>NaO 341.1624; Found 341.1621.

**(E)-2,2,9-Trimethyl-9-styryl-2,3-dihydro-1H,9H-pyrazolo[1,2-a]indazol-1-one (3l)**

Eluent: petroleum ether/ethyl acetate (3:1). Yellow solid (34.1 mg, 54%), mp 134.8-135.8 °C. <sup>1</sup>H NMR (CDCl<sub>3</sub>, 400 MHz): δ 7.35-7.33 (m, 2H), 7.29-7.24 (m, 3H), 7.22-7.18 (m, 1H), 7.15 (d, *J* = 7.2 Hz, 1H), 7.03 (td, *J*<sub>1</sub> = 7.6 Hz, *J*<sub>2</sub> = 0.8 Hz, 1H), 6.76 (d, *J* = 8.0 Hz, 1H), 6.49 (d, *J* = 16.0 Hz, 1H), 6.39 (d, *J* = 16.0 Hz, 1H), 3.66 (d, *J* = 8.4 Hz, 1H), 3.21 (d, *J* = 8.4 Hz, 1H), 2.06 (s, 3H), 1.41 (s, 3H), 1.29 (s, 3H). <sup>13</sup>C{<sup>1</sup>H} NMR (CDCl<sub>3</sub>, 150 MHz): δ 170.0, 147.2, 136.4, 135.0, 130.4, 129.1, 128.9, 128.6, 127.9, 127.0, 122.8, 122.6, 110.0, 66.1, 64.1, 46.0, 24.6, 23.3, 22.8. HRMS (ESI) *m/z*: [M+Na]<sup>+</sup> Calcd for C<sub>21</sub>H<sub>22</sub>N<sub>2</sub>NaO<sup>+</sup> 341.1624; Found 341.1619.

**(E)-2,2,7,9-Tetramethyl-9-styryl-2,3-dihydro-1H,9H-pyrazolo[1,2-a]indazol-1-one (3m)**

Eluent: petroleum ether/ethyl acetate (3:1). Yellow solid (26.6 mg, 40%), mp 137.5-138.5 °C. <sup>1</sup>H NMR (CDCl<sub>3</sub>, 400 MHz): δ 7.35-7.33 (m, 2H), 7.28-7.24 (m, 2H), 7.21-7.17 (m, 1H), 7.06-7.04 (m, 1H), 6.93 (s, 1H), 6.66 (d, *J* = 8.0 Hz, 1H), 6.49 (d, *J* = 15.6 Hz, 1H), 6.37 (d, *J* = 15.6 Hz, 1H), 3.62 (d, *J* = 8.4 Hz, 1H), 3.16 (d, *J* = 8.0 Hz, 1H), 2.32 (s, 3H), 2.03 (s, 3H), 1.40 (s, 3H), 1.27 (s, 3H). <sup>13</sup>C{<sup>1</sup>H} NMR (CDCl<sub>3</sub>, 100 MHz): δ 170.1, 145.0, 136.5, 135.2, 132.5, 130.5, 129.4, 128.9, 128.6, 127.8, 126.9, 123.1, 109.9, 66.1, 64.6, 46.0, 24.5, 23.3, 22.8, 21.1. HRMS (ESI) *m/z*: [M+Na]<sup>+</sup> Calcd for C<sub>22</sub>H<sub>24</sub>N<sub>2</sub>NaO<sup>+</sup> 355.1781; Found 355.1787.

**(E)-7-Methoxy-2,2,9-trimethyl-9-styryl-2,3-dihydro-1H,9H-pyrazolo[1,2-a]indazol-1-one (3n)**

Eluent: petroleum ether/ethyl acetate (3:1). Yellow solid (30.4 mg, 44%), mp 80.8-81.8 °C. <sup>1</sup>H NMR (CDCl<sub>3</sub>, 400 MHz): δ 7.36-7.34 (m, 2H), 7.29-7.25 (m, 2H), 7.22-7.18 (m, 1H), 6.81 (dd, *J*<sub>1</sub> = 8.4 Hz, *J*<sub>2</sub> = 2.4 Hz, 1H), 6.71-6.69 (m, 2H), 6.51 (d, *J* = 15.6 Hz, 1H), 6.38 (d, *J* = 16.0 Hz, 1H), 3.79 (s, 3H), 3.61 (d, *J* = 8.0 Hz, 1H), 3.14 (d, *J* = 8.0 Hz 1H), 2.05 (s, 3H), 1.40 (s, 3H), 1.28 (s, 3H). <sup>13</sup>C{<sup>1</sup>H} NMR (CDCl<sub>3</sub>, 100 MHz): δ 170.3, 156.3, 141.1, 136.40, 136.35, 130.3, 129.2, 128.6, 127.9, 127.0, 114.2, 110.8, 108.8, 66.3, 65.0, 56.0, 46.0, 24.5, 23.2, 22.7. HRMS (ESI) *m/z*: [M+Na]<sup>+</sup> Calcd for C<sub>22</sub>H<sub>24</sub>N<sub>2</sub>NaO<sub>2</sub> 371.1730; Found 371.1734.

**(E)-7-Fluoro-2,2,9-trimethyl-9-styryl-2,3-dihydro-1H,9H-pyrazolo[1,2-*a*]indazol-1-one (3o)**

Eluent: petroleum ether/ethyl acetate (3:1). Yellow solid (31.5 mg, 47%), mp 118.2-119.2 °C. <sup>1</sup>H NMR (CDCl<sub>3</sub>, 400 MHz): δ 7.36-7.34 (m, 2H), 7.30-7.26 (m, 2H), 7.24-7.20 (m, 1H), 6.96 (td, *J*<sub>1</sub> = 8.8 Hz, *J*<sub>2</sub> = 2.4 Hz, 1H), 6.87 (dd, *J*<sub>1</sub> = 8.0 Hz, *J*<sub>2</sub> = 2.4 Hz, 1H), 6.69 (dd, *J*<sub>1</sub> = 8.4 Hz, *J*<sub>2</sub> = 4.0 Hz, 1H), 6.50 (d, *J* = 15.6 Hz, 1H), 6.36 (d, *J* = 16.0 Hz, 1H), 3.62 (d, *J* = 8.4 Hz, 1H), 3.17 (d, *J* = 8.0 Hz, 1H), 2.04 (s, 3H), 1.40 (s, 3H), 1.29 (s, 3H). <sup>13</sup>C{<sup>1</sup>H} NMR (CDCl<sub>3</sub>, 100 MHz): δ 170.2, 159.3 (d, <sup>1</sup>*J*<sub>C-F</sub> = 239.5 Hz), 143.4 (d, <sup>4</sup>*J*<sub>C-F</sub> = 2.2 Hz), 136.6 (d, <sup>3</sup>*J*<sub>C-F</sub> = 8.5 Hz), 136.2, 129.8, 129.5, 128.6, 128.0, 127.0, 115.6 (d, <sup>2</sup>*J*<sub>C-F</sub> = 23.9 Hz), 110.8 (d, <sup>3</sup>*J*<sub>C-F</sub> = 9.2 Hz), 110.1 (d, <sup>2</sup>*J*<sub>C-F</sub> = 24.7 Hz), 66.2 (d, <sup>4</sup>*J*<sub>C-F</sub> = 2.2 Hz), 64.6, 46.0, 24.5, 23.2, 22.7. <sup>19</sup>F NMR (376 MHz, CDCl<sub>3</sub>): δ -120.49 (td, *J*<sub>1</sub> = 7.9 Hz, *J*<sub>2</sub> = 4.1 Hz). HRMS (ESI) *m/z*: [M+Na]<sup>+</sup> Calcd for C<sub>21</sub>H<sub>21</sub>FN<sub>2</sub>NaO<sup>+</sup> 359.1530; Found 359.1540.

**(E)-2,2,9-Trimethyl-9-styryl-7-(trifluoromethyl)-2,3-dihydro-1H,9H-pyrazolo[1,2-*a*]indazol-1-one (3p)**

Eluent: petroleum ether/ethyl acetate (3:1). Yellow solid (31.5 mg, 41%), mp 90.7-91.7 °C. <sup>1</sup>H NMR (CDCl<sub>3</sub>, 400 MHz): δ 7.53 (d, *J* = 8.0 Hz, 1H), 7.37-7.35 (m, 3H), 7.29 (t, *J* = 7.2 Hz, 2H), 7.25-7.21 (m, 1H), 6.80 (d, *J* = 8.4 Hz, 1H), 6.51 (d, *J* = 16.0 Hz, 1H), 6.37 (d, *J* = 15.6 Hz, 1H), 3.69 (d, *J* = 8.4 Hz, 1H), 3.29 (d, *J* = 8.4 Hz, 1H), 2.07 (s, 3H), 1.42 (s, 3H), 1.31 (s, 3H). <sup>13</sup>C{<sup>1</sup>H} NMR (CDCl<sub>3</sub>, 100 MHz): δ 170.0, 149.6, 136.0, 135.7, 129.7, 129.5, 128.7, 128.2, 127.0, 126.7 (q, <sup>3</sup>*J*<sub>C-F</sub> = 3.3 Hz), 124.9 (q, <sup>2</sup>*J*<sub>C-F</sub> = 31.8 Hz), 124.4 (q, <sup>1</sup>*J*<sub>C-F</sub> =

269.5 Hz), 119.8 (q,  $^3J_{C-F} = 3.4$  Hz), 109.5, 66.1, 63.2, 46.0, 24.5, 23.4, 22.8.  $^{19}\text{F}$  NMR (376 MHz,  $\text{CDCl}_3$ ):  $\delta$  -61.28 (s). HRMS (ESI)  $m/z$ :  $[\text{M}+\text{Na}]^+$  Calcd for  $\text{C}_{22}\text{H}_{21}\text{F}_3\text{N}_2\text{NaO}^+$  409.1498; Found 409.1487.

**(E)-9-Methyl-9-(4-methylstyryl)-2,3-dihydro-1H,9H-pyrazolo[1,2-a]indazol-1-one (3q)**

Eluent: petroleum ether/ethyl acetate (2:1). Yellow solid (44.5 mg, 73%), mp 44.6-45.2 °C.  $^1\text{H}$  NMR ( $\text{CDCl}_3$ , 600 MHz):  $\delta$  7.28-7.23 (m, 3H), 7.13 (d,  $J = 7.2$  Hz, 1H), 7.07 (d,  $J = 8.4$  Hz, 2H), 7.04 (td,  $J_1 = 7.8$  Hz,  $J_1 = 0.6$  Hz, 1H), 6.78 (d,  $J = 7.8$  Hz, 1H), 6.46 (d,  $J = 16.2$  Hz, 1H), 6.38 (d,  $J = 16.2$  Hz, 1H), 3.87 (td,  $J_1 = 9.0$  Hz,  $J_2 = 4.8$  Hz, 1H), 3.48-3.44 (m, 1H), 3.03-2.97 (m, 1H), 2.82-2.77 (m, 1H), 2.30 (s, 3H), 2.04 (s, 3H).  $^{13}\text{C}\{^1\text{H}\}$  NMR ( $\text{CDCl}_3$ , 150 MHz):  $\delta$  164.6, 147.2, 137.8, 135.1, 133.5, 129.3, 129.28, 129.26, 128.9, 126.8, 122.9, 122.8, 110.0, 66.3, 51.2, 35.4, 24.6, 21.3. HRMS (ESI)  $m/z$ :  $[\text{M}+\text{Na}]^+$  Calcd for  $\text{C}_{20}\text{H}_{20}\text{N}_2\text{NaO}$  327.1468; Found 327.1470.

**(E)-9-(4-Ethylstyryl)-9-methyl-2,3-dihydro-1H,9H-pyrazolo[1,2-a]indazol-1-one (3r)**

Eluent: petroleum ether/ethyl acetate (2:1). Yellow oil (42.6 mg, 67%).  $^1\text{H}$  NMR ( $\text{CDCl}_3$ , 600 MHz):  $\delta$  7.28-7.26 (m, 3H), 7.13 (d,  $J = 7.8$  Hz, 1H), 7.11 (d,  $J = 7.8$  Hz, 2H), 7.05 (td,  $J_1 = 7.8$  Hz,  $J_2 = 1.2$  Hz, 1H), 6.78 (d,  $J = 7.8$  Hz, 1H), 6.48 (d,  $J = 15.6$  Hz, 1H), 6.40 (d,  $J = 15.6$  Hz, 1H), 3.87 (td,  $J_1 = 8.4$  Hz,  $J_2 = 4.2$  Hz, 1H), 3.49-3.45 (m, 1H), 3.03-2.97 (m, 1H), 2.82-2.77 (m, 1H), 2.61 (q,  $J = 7.2$  Hz, 2H), 2.05 (s, 3H), 1.20 (t,  $J = 7.2$  Hz, 3H).  $^{13}\text{C}\{^1\text{H}\}$  NMR ( $\text{CDCl}_3$ , 150 MHz):  $\delta$  164.6, 147.2, 144.2, 135.1, 133.7, 129.4, 129.3, 128.9, 128.1, 126.9, 122.9, 122.8, 110.0, 66.3, 51.2, 35.4, 28.7, 24.6, 15.6. HRMS (ESI)  $m/z$ :  $[\text{M}+\text{Na}]^+$  Calcd for  $\text{C}_{21}\text{H}_{22}\text{N}_2\text{NaO}$  341.1624; Found 341.1632.

**(E)-9-(2-([1,1'-Biphenyl]-4-yl)vinyl)-9-methyl-2,3-dihydro-1H,9H-pyrazolo[1,2-a]indazol-1-one (3s)**

Eluent: petroleum ether/ethyl acetate (2:1). Yellow solid (40.4 mg, 55%), mp 136.0-136.9 °C.  $^1\text{H}$  NMR ( $\text{CDCl}_3$ , 400 MHz):  $\delta$  7.59-7.57 (m, 2H), 7.52 (d,  $J = 8.4$  Hz, 2H), 7.44-7.40 (m, 4H), 7.34-7.25 (m, 2H), 7.16 (d,  $J = 7.2$  Hz, 1H), 7.08-7.04 (m, 1H), 6.79 (d,  $J = 8.0$  Hz, 1H), 6.55 (d,  $J = 16.0$  Hz, 1H), 6.47 (d,  $J = 15.6$  Hz, 1H), 3.89 (td,  $J_1 = 8.4$  Hz,  $J_2 = 4.0$  Hz, 1H), 3.51-3.45 (m, 1H), 3.06-2.97 (m, 1H), 2.84-2.77 (m, 1H), 2.07

(s, 3H).  $^{13}\text{C}\{^1\text{H}\}$  NMR ( $\text{CDCl}_3$ , 100 MHz):  $\delta$  164.7, 147.2, 140.7, 140.6, 135.4, 135.0, 130.5, 129.0, 128.90, 128.88, 127.44, 127.37, 127.3, 127.0, 123.0, 122.8, 110.1, 66.3, 51.3, 35.4, 24.6. HRMS (ESI)  $m/z$ :  $[\text{M}+\text{Na}]^+$  Calcd for  $\text{C}_{25}\text{H}_{22}\text{N}_2\text{NaO}$  389.1624; Found 389.1622.

**(E)-9-(4-Fluorostyryl)-9-methyl-2,3-dihydro-1H,9H-pyrazolo[1,2-a]indazol-1-one (3t)**

Eluent: petroleum ether/ethyl acetate (2:1). Yellow solid (35.7 mg, 58%), mp 114.8-115.7 °C.  $^1\text{H}$  NMR ( $\text{CDCl}_3$ , 400 MHz):  $\delta$  7.26-7.19 (m, 3H), 7.06 (d,  $J = 7.2$  Hz, 1H), 6.98 (td,  $J_1 = 7.6$  Hz,  $J_2 = 0.4$  Hz, 1H), 6.91-6.86 (m, 2H), 6.72 (d,  $J = 8.0$  Hz, 1H), 6.40 (d,  $J = 16.0$  Hz, 1H), 6.28 (d,  $J = 16.0$  Hz, 1H), 3.81 (td,  $J_1 = 8.8$  Hz,  $J_2 = 4.8$  Hz, 1H), 3.44-3.37 (m, 1H), 2.98-2.89 (m, 1H), 2.77-2.69 (m, 1H), 1.97 (s, 3H).  $^{13}\text{C}\{^1\text{H}\}$  NMR ( $\text{CDCl}_3$ , 150 MHz):  $\delta$  164.7, 162.6 (d,  $^1J_{\text{C-F}} = 245.4$  Hz), 147.2, 134.9, 132.5 (d,  $^4J_{\text{C-F}} = 3.0$  Hz), 130.2 (d,  $^5J_{\text{C-F}} = 2.4$  Hz), 129.0, 128.5 (d,  $^3J_{\text{C-F}} = 7.1$  Hz), 128.2, 123.0, 122.7, 115.5 (d,  $^2J_{\text{C-F}} = 21.2$  Hz), 110.1, 66.2, 51.3, 35.4, 24.5.  $^{19}\text{F}$  NMR (565 MHz,  $\text{CDCl}_3$ ):  $\delta$  -114.10 – -114.15 (m). HRMS (ESI)  $m/z$ :  $[\text{M}+\text{Na}]^+$  Calcd for  $\text{C}_{19}\text{H}_{17}\text{FN}_2\text{NaO}$  331.1217; Found 331.1214.

**(E)-9-(4-Bromostyryl)-9-methyl-2,3-dihydro-1H,9H-pyrazolo[1,2-a]indazol-1-one (3u)**

Eluent: petroleum ether/ethyl acetate (2:1). Yellow solid (55.5 mg, 75%), mp 54.3-55.3 °C.  $^1\text{H}$  NMR ( $\text{CDCl}_3$ , 400 MHz):  $\delta$  7.39 (d,  $J = 8.8$  Hz, 2H), 7.30-7.26 (m, 1H), 7.21 (d,  $J = 8.4$  Hz, 2H), 7.14 (d,  $J = 7.2$  Hz, 1H), 7.07-7.03 (m, 1H), 6.79 (d,  $J = 8.0$  Hz, 1H), 6.47-6.39 (m, 2H), 3.89 (td,  $J_1 = 8.8$  Hz,  $J_2 = 4.0$  Hz, 1H), 3.51-3.44 (m, 1H), 3.05-2.97 (m, 1H), 2.84-2.76 (m, 1H), 2.05 (s, 3H).  $^{13}\text{C}\{^1\text{H}\}$  NMR ( $\text{CDCl}_3$ , 100 MHz):  $\delta$  164.8, 147.2, 135.3, 134.7, 131.7, 131.2, 129.1, 128.5, 128.2, 123.1, 122.7, 121.8, 110.1, 66.2, 51.3, 35.4, 24.5. HRMS (ESI)  $m/z$ :  $[\text{M}+\text{Na}]^+$  Calcd for  $\text{C}_{19}\text{H}_{17}\text{BrN}_2\text{NaO}$  391.0416; Found 391.0407.

**(E)-9-Methyl-9-(4-(trifluoromethyl)styryl)-2,3-dihydro-1H,9H-pyrazolo[1,2-a]indazol-1-one (3v)**

Eluent: petroleum ether/ethyl acetate (2:1). Yellow solid (39.4 mg, 55%), mp 44.3-45.3 °C.  $^1\text{H}$  NMR ( $\text{CDCl}_3$ , 600 MHz):  $\delta$  7.52 (d,  $J = 8.4$  Hz, 2H), 7.45 (d,  $J = 8.4$  Hz, 2H), 7.29 (t,  $J = 7.8$  Hz, 1H), 7.15 (d,  $J = 7.2$  Hz, 1H), 7.06 (t,  $J = 7.2$  Hz, 1H), 6.80 (d,  $J = 7.8$  Hz, 1H), 6.55 (d,  $J = 15.6$  Hz, 1H), 6.51 (d,  $J = 16.2$  Hz, 1H),

3.90 (td,  $J_1 = 8.4$  Hz,  $J_2 = 4.2$  Hz, 1H), 3.51-3.46 (m, 1H), 3.05-2.99 (m, 1H), 2.84-2.79 (m, 1H), 2.07 (s, 3H).  
 $^{13}\text{C}\{^1\text{H}\}$  NMR ( $\text{CDCl}_3$ , 150 MHz):  $\delta$  164.9, 147.2, 139.9, 134.5, 133.0, 129.7 (q,  $^2J_{\text{C-F}} = 31.7$  Hz), 129.2, 128.0, 127.1, 125.5 (q,  $^3J_{\text{C-F}} = 3.5$  Hz), 124.3 (q,  $^1J_{\text{C-F}} = 270.5$  Hz), 123.1, 122.6, 110.2, 66.2, 51.3, 35.4, 24.4.  
 $^{19}\text{F}$  NMR (565 MHz,  $\text{CDCl}_3$ ):  $\delta$  -62.50 (s). HRMS (ESI)  $m/z$ :  $[\text{M}+\text{Na}]^+$  Calcd for  $\text{C}_{20}\text{H}_{17}\text{F}_3\text{N}_2\text{NaO}$  381.1185; Found 381.1177.

**(E)-9-Methyl-9-(3-methylstyryl)-2,3-dihydro-1H,9H-pyrazolo[1,2-a]indazol-1-one (3w)**

Eluent: petroleum ether/ethyl acetate (2:1). Yellow oil (41.4 mg, 68%).  $^1\text{H}$  NMR ( $\text{CDCl}_3$ , 600 MHz):  $\delta$  7.28-7.25 (m, 1H), 7.18 (s, 1H), 7.17-7.13 (m, 3H), 7.05-7.01 (m, 2H), 6.78 (d,  $J = 7.8$  Hz, 1H), 6.47 (d,  $J = 16.2$  Hz, 1H), 6.42 (d,  $J = 15.6$  Hz, 1H), 3.86 (td,  $J_1 = 8.4$  Hz,  $J_2 = 4.2$  Hz, 1H), 3.49-3.44 (m, 1H), 3.02-2.96 (m, 1H), 2.82-2.77 (m, 1H), 2.30 (s, 3H), 2.05 (s, 3H).  $^{13}\text{C}\{^1\text{H}\}$  NMR ( $\text{CDCl}_3$ , 150 MHz):  $\delta$  164.6, 147.2, 138.1, 136.2, 135.0, 130.1, 129.4, 128.9, 128.7, 128.5, 127.5, 124.2, 122.9, 122.7, 110.0, 66.3, 51.2, 35.4, 24.5, 21.4. HRMS (ESI)  $m/z$ :  $[\text{M}+\text{Na}]^+$  Calcd for  $\text{C}_{20}\text{H}_{20}\text{N}_2\text{NaO}$  327.1468; Found 327.1479.

**(E)-9-(3-Chlorostyryl)-9-methyl-2,3-dihydro-1H,9H-pyrazolo[1,2-a]indazol-1-one (3x)**

Eluent: petroleum ether/ethyl acetate (2:1). Yellow solid (45.2 mg, 70%), mp 45.6-46.2 °C.  $^1\text{H}$  NMR ( $\text{CDCl}_3$ , 400 MHz):  $\delta$  7.35 (s, 1H), 7.30-7.26 (m, 1H), 7.23-7.16 (m, 3H), 7.14-7.13 (m, 1H), 7.05 (td,  $J_1 = 7.2$  Hz,  $J_2 = 0.8$  Hz, 1H), 6.79 (d,  $J = 8.0$  Hz, 1H), 6.49-6.40 (m, 2H), 3.89 (td,  $J_1 = 8.4$  Hz,  $J_2 = 4.4$  Hz, 1H), 3.51-3.44 (m, 1H), 3.05-2.97 (m, 1H), 2.84-2.77 (m, 1H), 2.05 (s, 3H).  $^{13}\text{C}\{^1\text{H}\}$  NMR ( $\text{CDCl}_3$ , 150 MHz):  $\delta$  164.8, 147.2, 138.2, 134.7, 134.5, 131.9, 129.8, 129.1, 128.0, 127.9, 126.8, 125.2, 123.1, 122.7, 110.1, 66.1, 51.3, 35.4, 24.4. HRMS (ESI)  $m/z$ :  $[\text{M}+\text{Na}]^+$  Calcd for  $\text{C}_{19}\text{H}_{17}\text{ClN}_2\text{NaO}$  347.0922; Found 347.0921.

**(E)-9-Methyl-9-(2-methylstyryl)-2,3-dihydro-1H,9H-pyrazolo[1,2-a]indazol-1-one (3y)**

Eluent: petroleum ether/ethyl acetate (2:1). Yellow solid (37.6 mg, 62%), mp 94.5-95.3 °C.  $^1\text{H}$  NMR ( $\text{CDCl}_3$ , 400 MHz):  $\delta$  7.42-7.40 (m, 1H), 7.29-7.25 (m, 1H), 7.15-7.08 (m, 4H), 7.05 (td,  $J_1 = 7.2$  Hz,  $J_2 = 0.8$  Hz, 1H), 6.78 (d,  $J = 7.6$  Hz, 1H), 6.74 (d,  $J = 16.0$  Hz, 1H), 6.31 (d,  $J = 15.6$  Hz, 1H), 3.85 (td,  $J_1 = 8.4$  Hz,  $J_2 = 4.8$  Hz,



1H), 3.53-3.47 (m, 1H), 3.02-2.94 (m, 1H), 2.85-2.77 (m, 1H), 2.28 (s, 3H), 2.05 (s, 3H). <sup>13</sup>C{<sup>1</sup>H} NMR (CDCl<sub>3</sub>, 100 MHz): δ 164.6, 147.2, 135.8, 135.5, 135.1, 131.7, 130.3, 128.9, 127.8, 127.4, 126.13, 126.11, 122.9, 122.7, 110.0, 66.4, 51.2, 35.4, 24.6, 19.8. HRMS (ESI) *m/z*: [M+Na]<sup>+</sup> Calcd for C<sub>20</sub>H<sub>20</sub>N<sub>2</sub>NaO 327.1468; Found 327.1471.

**(E)-9-(2-Chlorostyryl)-9-methyl-2,3-dihydro-1H,9H-pyrazolo[1,2-*a*]indazol-1-one (3z)**

Eluent: petroleum ether/ethyl acetate (2:1). Yellow oil (50.8 mg, 78%). <sup>1</sup>H NMR (CDCl<sub>3</sub>, 400 MHz): 7.52 (dd, *J*<sub>1</sub> = 7.6 Hz, *J*<sub>2</sub> = 2.4 Hz, 1H), 7.32-7.26 (m, 2H), 7.20-7.12 (m, 3H), 7.06 (td, *J*<sub>1</sub> = 7.6 Hz, *J*<sub>2</sub> = 0.8 Hz, 1H), 6.93 (d, *J* = 16.0 Hz, 1H), 6.79 (d, *J* = 8.0 Hz, 1H), 6.46 (d, *J* = 16.0 Hz, 1H), 3.82 (td, *J*<sub>1</sub> = 8.8 Hz, *J*<sub>2</sub> = 5.6 Hz, 1H), 3.58-3.51 (m, 1H), 3.01-2.93 (m, 1H), 2.87-2.79 (m, 1H), 2.04 (s, 3H). <sup>13</sup>C{<sup>1</sup>H} NMR (CDCl<sub>3</sub>, 100 MHz): δ 164.6, 147.2, 134.5, 133.4, 133.0, 129.6, 129.0, 128.9, 127.3, 126.8, 125.8, 122.9, 122.8, 110.0, 66.2, 51.2, 35.3, 24.4. HRMS (ESI) *m/z*: [M+Na]<sup>+</sup> Calcd for C<sub>19</sub>H<sub>17</sub>ClN<sub>2</sub>NaO 347.0922; Found 347.0918.

**(E)-9-Methyl-9-(2-(naphthalen-1-yl)vinyl)-2,3-dihydro-1H,9H-pyrazolo[1,2-*a*]indazol-1-one (3aa)**

Eluent: petroleum ether/ethyl acetate (2:1). Yellow solid (46.7 mg, 69%), mp 46.3-47.2 °C. <sup>1</sup>H NMR (CDCl<sub>3</sub>, 600 MHz): δ 8.01 (d, *J* = 8.4 Hz, 1H), 7.83-7.82 (m, 1H), 7.76 (d, *J* = 8.4 Hz, 1H), 7.58 (d, *J* = 7.2 Hz, 1H), 7.51-7.46 (m, 2H), 7.42-7.39 (m, 1H), 7.31-7.29 (m, 2H), 7.22 (d, *J* = 7.2 Hz, 1H), 7.09 (t, *J* = 7.8 Hz, 1H), 6.82 (d, *J* = 7.8 Hz, 1H), 6.48 (d, *J* = 15.6 Hz, 1H), 3.89 (td, *J*<sub>1</sub> = 8.4 Hz, *J*<sub>2</sub> = 4.8 Hz, 1H), 3.56-3.51 (m, 1H), 3.06-3.00 (m, 1H), 2.88-2.83 (m, 1H), 2.13 (s, 3H). <sup>13</sup>C{<sup>1</sup>H} NMR (CDCl<sub>3</sub>, 150 MHz): δ 164.8, 147.3, 135.0, 134.2, 133.7, 133.6, 131.3, 129.0, 128.6, 128.3, 126.8, 126.2, 125.9, 125.7, 124.4, 123.9, 123.0, 122.7, 110.1, 66.5, 51.3, 35.5, 24.8. HRMS (ESI) *m/z*: [M+Na]<sup>+</sup> Calcd for C<sub>23</sub>H<sub>20</sub>N<sub>2</sub>NaO 363.1468; Found 363.1457.

**(E)-9-Methyl-9-(prop-1-en-1-yl)-2,3-dihydro-1H,9H-pyrazolo[1,2-*a*]indazol-1-one (3bb)**

Eluent: petroleum ether/ethyl acetate (2:1). Yellow oil (29.0 mg, 64%). <sup>1</sup>H NMR (CDCl<sub>3</sub>, 400 MHz): δ 7.26-7.22 (m, 1H), 7.07-7.00 (m, 2H), 6.75 (d, *J* = 8.0 Hz, 1H), 5.73 (dd, *J*<sub>1</sub> = 15.6 Hz, *J*<sub>2</sub> = 1.6 Hz, 1H), 5.67-5.60 (m, 1H), 3.83 (td, *J*<sub>1</sub> = 8.8 Hz, *J*<sub>2</sub> = 4.8 Hz, 1H), 3.47-3.40 (m, 1H), 3.01-2.92 (m, 1H), 2.80-2.73 (m,

1H), 1.92 (s, 3H), 1.69 (dd,  $J_1 = 6.4$  Hz,  $J_2 = 1.2$  Hz, 3H).  $^{13}\text{C}\{^1\text{H}\}$  NMR ( $\text{CDCl}_3$ , 150 MHz):  $\delta$  164.3, 146.9, 135.6, 132.1, 128.7, 125.5, 122.8, 122.6, 109.9, 66.1, 51.2, 35.5, 24.5, 17.6. HRMS (ESI)  $m/z$ :  $[\text{M}+\text{Na}]^+$  Calcd for  $\text{C}_{14}\text{H}_{16}\text{N}_2\text{NaO}$  251.1155; Found 251.1147.

**(E)-9-(Hept-1-en-1-yl)-9-methyl-2,3-dihydro-1H,9H-pyrazolo[1,2-a]indazol-1-one (3cc)**

Eluent: petroleum ether/ethyl acetate (2:1). Yellow oil (39.9 mg, 70%).  $^1\text{H}$  NMR ( $\text{CDCl}_3$ , 400 MHz):  $\delta$  7.26-7.22 (m, 1H), 7.06-7.00 (m, 2H), 6.75 (d,  $J = 8.0$  Hz, 1H), 5.71 (d,  $J = 15.2$  Hz, 1H), 5.65-5.58 (m, 1H), 3.81 (td,  $J_1 = 8.8$  Hz,  $J_2 = 5.2$  Hz, 1H), 3.48-3.42 (m, 1H), 3.00-2.91 (m, 1H), 2.81-2.74 (m, 1H), 2.05-2.00 (m, 2H), 1.91 (s, 3H), 1.39-1.30 (m, 2H), 1.29-1.21 (m, 4H), 0.86 (t,  $J = 6.8$  Hz, 3H).  $^{13}\text{C}\{^1\text{H}\}$  NMR ( $\text{CDCl}_3$ , 150 MHz):  $\delta$  164.3, 147.0, 135.7, 130.9, 130.7, 128.6, 122.8, 122.6, 109.9, 66.1, 51.2, 35.5, 32.0, 31.5, 28.8, 24.6, 22.6, 14.1. HRMS (ESI)  $m/z$ :  $[\text{M}+\text{Na}]^+$  Calcd for  $\text{C}_{18}\text{H}_{24}\text{N}_2\text{NaO}$  307.1781; Found 307.1788.

**(E)-9-Methyl-9-(3-phenylprop-1-en-1-yl)-2,3-dihydro-1H,9H-pyrazolo[1,2-a]indazol-1-one (3dd)**

Eluent: petroleum ether/ethyl acetate (2:1). Yellow oil (36.4 mg, 60%).  $^1\text{H}$  NMR ( $\text{CDCl}_3$ , 600 MHz):  $\delta$  7.28 (t,  $J = 7.8$  Hz, 2H), 7.24 (td,  $J_1 = 7.8$  Hz,  $J_2 = 1.2$  Hz, 1H), 7.19 (t,  $J = 7.2$  Hz, 1H), 7.16 (d,  $J = 6.6$  Hz, 2H), 7.06-7.04 (m, 1H), 7.01 (td,  $J_1 = 7.2$  Hz,  $J_2 = 0.6$  Hz, 1H), 6.76 (d,  $J = 7.8$  Hz, 1H), 5.84-5.77 (m, 2H), 3.79 (td,  $J_1 = 8.4$  Hz,  $J_2 = 5.4$  Hz, 1H), 3.50-3.46 (m, 1H), 3.43-3.36 (m, 2H), 2.97-2.91 (m, 1H), 2.82-2.77 (m, 1H), 1.93 (s, 3H).  $^{13}\text{C}\{^1\text{H}\}$  NMR ( $\text{CDCl}_3$ , 150 MHz):  $\delta$  164.4, 147.1, 139.9, 135.4, 132.5, 129.2, 128.7, 128.5, 126.2, 122.9, 122.6, 109.9, 66.0, 51.2, 38.4, 35.4, 24.6. HRMS (ESI)  $m/z$ :  $[\text{M}+\text{Na}]^+$  Calcd for  $\text{C}_{20}\text{H}_{20}\text{N}_2\text{NaO}$  327.1468; Found 327.1473.

**(E)-2,9-dimethyl-9-styryl-2,3-dihydro-1H,9H-pyrazolo[1,2-a]indazol-1-one (3ee)**

Product **3ee** was obtained as a mixture of two diastereoisomers. **3ee-1**: Eluent: petroleum ether/ethyl acetate (3:1). Yellow oil (13.6 mg, 22%),  $^1\text{H}$  NMR ( $\text{CDCl}_3$ , 600 MHz):  $\delta$  7.40-7.33 (m, 2H), 7.28-7.25 (m, 3H), 7.21-7.16 (m, 2H), 7.05 (td,  $J_1 = 7.2$  Hz,  $J_2 = 0.6$  Hz, 1H), 6.78 (d,  $J = 7.8$  Hz, 1H), 6.46 (d,  $J = 16.2$  Hz, 1H), 6.38 (d,  $J = 15.6$  Hz, 1H), 4.15 (t,  $J = 7.8$  Hz, 1H), 3.21-3.17 (m, 1H), 2.95 (dd,  $J_1 = 12.6$  Hz,  $J_2 = 8.4$  Hz, 1H),

2.11 (s, 3H), 1.30 (d,  $J = 7.2$  Hz, 3H).  $^{13}\text{C}\{^1\text{H}\}$  NMR ( $\text{CDCl}_3$ , 150 MHz):  $\delta$  167.2, 147.0, 136.2, 134.9, 130.2, 128.9, 128.8, 128.5, 127.8, 126.8, 122.8, 122.5, 110.1, 66.3, 58.7, 40.8, 24.6, 13.5. HRMS (ESI)  $m/z$ :  $[\text{M}+\text{Na}]^+$  Calcd for  $\text{C}_{20}\text{H}_{20}\text{N}_2\text{NaO}$  327.1468; Found 327.1475.

**3ee-2**: Eluent: petroleum ether/ethyl acetate (3:1). Yellow oil (22.6 mg, 37%),  $^1\text{H}$  NMR ( $\text{CDCl}_3$ , 400 MHz):  $\delta$  7.38 (d,  $J = 7.2$  Hz, 2H), 7.30-7.20 (m, 4H), 7.11 (d,  $J = 7.2$  Hz, 1H), 7.02 (t,  $J = 7.6$  Hz, 1H), 6.78 (d,  $J = 8.0$  Hz, 1H), 6.56 (d,  $J = 16.0$  Hz, 1H), 6.49 (d,  $J = 16.0$  Hz, 1H), 3.83 (t,  $J = 8.0$  Hz, 1H), 3.31 (t,  $J = 7.6$  Hz, 1H), 3.08-2.98 (m, 1H), 1.96 (s, 3H), 1.37 (d,  $J = 7.2$  Hz, 3H).  $^{13}\text{C}\{^1\text{H}\}$  NMR ( $\text{CDCl}_3$ , 150 MHz):  $\delta$  167.7, 147.2, 136.3, 135.0, 130.5, 129.5, 128.8, 128.5, 127.8, 126.9, 122.8, 122.7, 109.9, 65.9, 58.1, 41.3, 24.4, 14.6. HRMS (ESI)  $m/z$ :  $[\text{M}+\text{Na}]^+$  Calcd for  $\text{C}_{20}\text{H}_{20}\text{N}_2\text{NaO}$  327.1468; Found 327.1477.

## 2. Typical procedure for the synthesis of **4a** and spectroscopic data of **4a-4t**

To a reaction tube equipped with a stir bar were charged with 1-phenylpyrazolidin-3-one (**1a**, 32.4 mg, 0.2 mmol), DCE (2 mL),  $[\text{RhCp}^*\text{Cl}_2]_2$  (3.1 mg, 0.005 mmol), NaOAc (8.2 mg, 0.1 mmol) and 1-phenylbuta-2,3-dien-1-yl acetate (**2a**, 112.8 mg, 0.6 mmol). The tube was then sealed, and the mixture was stirred at 50 °C under argon for 6 h. Upon completion, it was quenched with saturated brine and extracted with dichloromethane (10 mL  $\times$  3). The combined organic phases were dried over anhydrous  $\text{Na}_2\text{SO}_4$ , filtered through a pad of celite, and concentrated under reduced pressure. The residue was purified by silica gel column chromatography using petroleum ether/ethyl acetate (3:1) as eluent to afford **4a**. **4b-4t** were obtained in a similar manner.

### **9-Methyl-5-((E)-4-phenylbuta-1,3-dien-2-yl)-9-((E)-styryl)-2,3-dihydro-1H,9H-pyrazolo[1,2-a]indazol-1-one (4a)**

Eluent: petroleum ether/ethyl acetate (3:1). Yellow solid (61.2 mg, 73%), mp 77.7-78.7 °C.  $^1\text{H}$  NMR ( $\text{CDCl}_3$ , 600 MHz):  $\delta$  7.40-7.39 (m, 2H), 7.35 (d,  $J = 7.2$  Hz, 2H), 7.32-7.28 (m, 4H), 7.25-7.22 (m, 2H), 7.15 (dd,  $J_1 = 7.2$  Hz,  $J_2 = 1.8$  Hz, 1H), 7.13 (dd,  $J_1 = 7.2$  Hz,  $J_2 = 1.2$  Hz, 1H), 7.09 (t,  $J = 7.8$  Hz, 1H), 7.02 (d,  $J = 16.2$  Hz,

1H), 6.56 (d,  $J = 15.6$  Hz, 1H), 6.46 (d,  $J = 16.2$  Hz, 1H), 6.29 (d,  $J = 16.2$  Hz, 1H), 5.58 (s, 1H), 5.34 (d,  $J = 1.8$  Hz, 1H), 3.78 (td,  $J_1 = 9.0$  Hz,  $J_2 = 4.8$  Hz, 1H), 3.38-3.34 (m, 1H), 2.90-2.84 (m, 1H), 2.69-2.64 (m, 1H), 2.11 (s, 3H).  $^{13}\text{C}\{^1\text{H}\}$  NMR ( $\text{CDCl}_3$ , 150 MHz):  $\delta$  164.6, 144.8, 144.3, 136.9, 136.4, 135.6, 132.9, 130.5, 130.4, 129.2, 128.8, 128.6, 128.1, 127.9, 127.0, 126.8, 123.6, 122.9, 121.9, 119.8, 65.6, 50.9, 35.4, 24.5. HRMS (ESI)  $m/z$ :  $[\text{M}+\text{Na}]^+$  Calcd for  $\text{C}_{29}\text{H}_{26}\text{N}_2\text{NaO}$  441.1937; Found 441.1919.

**7,9-Dimethyl-5-((*E*)-4-phenylbuta-1,3-dien-2-yl)-9-((*E*)-styryl)-2,3-dihydro-1*H*,9*H*-pyrazolo[1,2-*a*]indazol-1-one (4b)**

Eluent: petroleum ether/ethyl acetate (3:1). Yellow solid (47.4 mg, 55%), mp 131.7-132.5 °C.  $^1\text{H}$  NMR ( $\text{CDCl}_3$ , 400 MHz):  $\delta$  7.41 (d,  $J = 7.2$  Hz, 2H), 7.36 (d,  $J = 7.2$  Hz, 2H), 7.33-7.27 (m, 4H), 7.25-7.21 (m, 2H), 7.00 (d,  $J = 16.0$  Hz, 1H), 6.95 (s, 1H), 6.93 (s, 1H), 6.58 (d,  $J = 16.0$  Hz, 1H), 6.44 (d,  $J = 16.0$  Hz, 1H), 6.31 (d,  $J = 16.0$  Hz, 1H), 5.56 (s, 1H), 5.32 (s, 1H), 3.77-3.71 (m, 1H), 3.35-3.28 (m, 1H), 2.90-2.81 (m, 1H), 2.68-2.61 (m, 1H), 2.36 (s, 3H), 2.09 (s, 3H).  $^{13}\text{C}\{^1\text{H}\}$  NMR ( $\text{CDCl}_3$ , 100 MHz):  $\delta$  164.7, 144.9, 142.2, 136.9, 136.5, 135.9, 132.9, 132.7, 130.8, 130.7, 129.05, 129.00, 128.8, 128.6, 128.0, 127.9, 127.0, 126.9, 123.5, 122.4, 119.7, 65.6, 51.3, 35.5, 24.5, 21.1. HRMS (ESI)  $m/z$ :  $[\text{M}+\text{Na}]^+$  Calcd for  $\text{C}_{30}\text{H}_{28}\text{N}_2\text{NaO}$  455.2094; Found 455.2097.

**7-Ethyl-9-methyl-5-((*E*)-4-phenylbuta-1,3-dien-2-yl)-9-((*E*)-styryl)-2,3-dihydro-1*H*,9*H*-pyrazolo[1,2-*a*]indazol-1-one (4c)**

Eluent: petroleum ether/ethyl acetate (3:1). Yellow solid (45.6 mg, 51%), mp 131.0-131.6 °C.  $^1\text{H}$  NMR ( $\text{CDCl}_3$ , 600 MHz):  $\delta$  7.41 (d,  $J = 7.2$  Hz, 2H), 7.36 (d,  $J = 7.8$  Hz, 2H), 7.32-7.28 (m, 4H), 7.25-7.22 (m, 2H), 7.01 (d,  $J = 16.2$  Hz, 1H), 6.97 (s, 1H), 6.96 (s, 1H), 6.58 (d,  $J = 15.6$  Hz, 1H), 6.45 (d,  $J = 16.2$  Hz, 1H), 6.32 (d,  $J = 15.6$  Hz, 1H), 5.57 (s, 1H), 5.34 (d,  $J = 1.2$  Hz, 1H), 3.75 (td,  $J_1 = 9.0$  Hz,  $J_2 = 4.8$  Hz, 1H), 3.35-3.30 (m, 1H), 2.89-2.83 (m, 1H), 2.69-2.63 (m, 3H), 2.11 (s, 3H), 1.27 (t,  $J = 7.8$  Hz, 3H).  $^{13}\text{C}\{^1\text{H}\}$  NMR ( $\text{CDCl}_3$ , 150 MHz):  $\delta$  164.6, 144.9, 142.3, 139.1, 136.9, 136.4, 135.7, 132.8, 130.6, 129.6, 129.0, 128.9, 128.7, 128.5,

127.9, 127.8, 126.9, 126.8, 123.4, 121.1, 119.6, 65.6, 51.2, 35.4, 28.4, 24.4, 15.8. HRMS (ESI)  $m/z$ :  $[M+Na]^+$   
Calcd for  $C_{31}H_{30}N_2NaO$  469.2250; Found 469.2247.

**7-(*tert*-Butyl)-9-methyl-5-((*E*)-4-phenylbuta-1,3-dien-2-yl)-9-((*E*)-styryl)-2,3-dihydro-1*H*,9*H*-pyrazolo[1,2-*a*]indazol-1-one (4d)**

Eluent: petroleum ether/ethyl acetate (3:1). Yellow solid (57.6 mg, 61%), mp 76.5-77.5 °C.  $^1H$  NMR ( $CDCl_3$ , 400 MHz):  $\delta$  7.41-7.39 (m, 2H), 7.35 (d,  $J = 7.2$  Hz, 2H), 7.32-7.26 (m, 4H), 7.24-7.20 (m, 2H), 7.13 (s, 2H), 7.00 (d,  $J = 16.0$  Hz, 1H), 6.57 (d,  $J = 16.0$  Hz, 1H), 6.44 (d,  $J = 15.6$  Hz, 1H), 6.32 (d,  $J = 16.0$  Hz, 1H), 5.56 (s, 1H), 5.34 (d,  $J = 1.6$  Hz, 1H), 3.76 (td,  $J_1 = 8.8$  Hz,  $J_2 = 4.0$  Hz, 1H), 3.34-3.27 (m, 1H), 2.90-2.82 (m, 1H), 2.67-2.60 (m, 1H), 2.11 (s, 3H), 1.33 (s, 9H).  $^{13}C\{^1H\}$  NMR ( $CDCl_3$ , 100 MHz):  $\delta$  163.6, 145.2, 144.1, 140.9, 135.9, 135.4, 134.3, 131.7, 129.6, 128.0, 127.8, 127.6, 127.5, 126.9, 126.7, 126.2, 125.9, 125.7, 121.8, 118.6, 117.5, 64.7, 49.9, 34.3, 33.6, 30.6, 23.4. HRMS (ESI)  $m/z$ :  $[M+Na]^+$  Calcd for  $C_{33}H_{34}N_2NaO$  497.2563; Found 497.2554.

**7-Fluoro-9-methyl-5-((*E*)-4-phenylbuta-1,3-dien-2-yl)-9-((*E*)-styryl)-2,3-dihydro-1*H*,9*H*-pyrazolo[1,2-*a*]indazol-1-one (4e)**

Eluent: petroleum ether/ethyl acetate (3:1). Yellow solid (55.7 mg, 64%), mp 118.7-119.6 °C.  $^1H$  NMR ( $CDCl_3$ , 400 MHz):  $\delta$  7.41-7.38 (m, 2H), 7.37-7.34 (m, 2H), 7.33-7.28 (m, 4H), 7.26-7.22 (m, 2H), 6.98 (d,  $J = 16.0$  Hz, 1H), 6.88-6.84 (m, 2H), 6.56 (d,  $J = 15.6$  Hz, 1H), 6.42 (d,  $J = 16.0$  Hz, 1H), 6.30 (d,  $J = 16.0$  Hz, 1H), 5.58 (s, 1H), 5.34 (d,  $J = 0.8$  Hz, 1H), 3.76-3.70 (m, 1H), 3.34-3.27 (m, 1H), 2.89-2.80 (m, 1H), 2.68-2.61 (m, 1H), 2.08 (s, 3H).  $^{13}C\{^1H\}$  NMR ( $CDCl_3$ , 100 MHz):  $\delta$  164.6, 159.0 (d,  $^1J_{C-F} = 249.4$  Hz), 143.7, 140.6, 137.1 (d,  $^3J_{C-F} = 7.9$  Hz), 136.6, 136.1, 133.0, 129.9, 129.5, 128.7, 128.6, 128.3, 128.2, 128.0, 126.9, 126.8, 124.7 (d,  $^3J_{C-F} = 7.3$  Hz), 120.1, 116.8 (d,  $^2J_{C-F} = 24.2$  Hz), 109.2 (d,  $^2J_{C-F} = 24.5$  Hz), 65.6 (d,  $^4J_{C-F} = 2.2$  Hz), 51.2, 35.2, 24.3.  $^{19}F$  NMR (376 MHz,  $CDCl_3$ ):  $\delta$  -120.50 (t,  $J = 9.4$  Hz). HRMS (ESI)  $m/z$ :  $[M+Na]^+$   
Calcd for  $C_{29}H_{25}FN_2NaO$  459.1843; Found 459.1841.

**7-Chloro-9-methyl-5-((E)-4-phenylbuta-1,3-dien-2-yl)-9-((E)-styryl)-2,3-dihydro-1H,9H-pyrazolo[1,2-a]indazol-1-one (4f)**

Eluent: petroleum ether/ethyl acetate (3:1). Yellow solid (40.7 mg, 45%), mp 155.9-156.4 °C. <sup>1</sup>H NMR (CDCl<sub>3</sub>, 400 MHz): δ 7.41-7.39 (m, 2H), 7.36-7.34 (m, 2H), 7.33-7.25 (m, 5H), 7.24-7.22 (m, 1H), 7.10 (s, 2H), 6.97 (d, *J* = 16.4 Hz, 1H), 6.57 (d, *J* = 16.0 Hz, 1H), 6.40 (d, *J* = 16.0 Hz, 1H), 6.27 (d, *J* = 16.0 Hz, 1H), 5.58 (s, 1H), 5.33 (s, 1H), 3.73 (td, *J*<sub>1</sub> = 8.8 Hz, *J*<sub>2</sub> = 4.8 Hz, 1H), 3.37-3.30 (m, 1H), 2.89-2.80 (m, 1H), 2.69-2.62 (m, 1H), 2.08 (s, 3H). <sup>13</sup>C{<sup>1</sup>H} NMR (CDCl<sub>3</sub>, 150 MHz): δ 164.4, 143.6, 143.0, 137.3, 136.5, 136.1, 133.1, 130.0, 129.8, 129.5, 128.7, 128.6, 128.2, 128.1, 127.8, 126.9, 126.8, 124.7, 122.0, 120.2, 65.5, 50.7, 35.2, 24.3. HRMS (ESI) *m/z*: [M+Na]<sup>+</sup> Calcd for C<sub>29</sub>H<sub>25</sub>ClN<sub>2</sub>NaO 475.1548; Found 475.1557.

**7-Bromo-9-methyl-5-((E)-4-phenylbuta-1,3-dien-2-yl)-9-((E)-styryl)-2,3-dihydro-1H,9H-pyrazolo[1,2-a]indazol-1-one (4g)**

Eluent: petroleum ether/ethyl acetate (3:1). Yellow solid (61.7 mg, 62%), mp 99.2-99.9 °C. <sup>1</sup>H NMR (CDCl<sub>3</sub>, 400 MHz): δ 7.40 (d, *J* = 7.6 Hz, 2H), 7.35 (d, *J* = 7.2 Hz, 2H), 7.33-7.26 (m, 5H), 7.25-7.22 (m, 3H), 6.97 (d, *J* = 16.0 Hz, 1H), 6.57 (d, *J* = 16.0 Hz, 1H), 6.40 (d, *J* = 16.0 Hz, 1H), 6.27 (d, *J* = 16.0 Hz, 1H), 5.58 (s, 1H), 5.32 (s, 1H), 3.73 (td, *J*<sub>1</sub> = 8.8 Hz, *J*<sub>2</sub> = 4.4 Hz, 1H), 3.37-3.31 (m, 1H), 2.89-2.80 (m, 1H), 2.69-2.62 (m, 1H), 2.07 (s, 3H). <sup>13</sup>C{<sup>1</sup>H} NMR (CDCl<sub>3</sub>, 150 MHz): δ 164.4, 143.6, 143.4, 137.6, 136.5, 136.1, 133.2, 132.7, 129.8, 129.5, 128.7, 128.6, 128.2, 128.1, 127.0, 126.8, 125.1, 124.8, 120.2, 114.9, 65.4, 50.6, 35.2, 24.3. HRMS (ESI) *m/z*: [M+Na]<sup>+</sup> Calcd for C<sub>29</sub>H<sub>25</sub>BrN<sub>2</sub>NaO 519.1042; Found 519.1050.

**9-Methyl-1-oxo-5-((E)-4-phenylbuta-1,3-dien-2-yl)-9-((E)-styryl)-2,3-dihydro-1H,9H-pyrazolo[1,2-a]indazole-7-carbonitrile (4h)**

Eluent: petroleum ether/ethyl acetate (3:1). Yellow solid (46.7 mg, 53%), mp 138.1-139.0 °C. <sup>1</sup>H NMR (CDCl<sub>3</sub>, 400 MHz): δ 7.41-7.38 (m, 4H), 7.35-7.32 (m, 4H), 7.30-7.23 (m, 4H), 6.99 (d, *J* = 16.0 Hz, 1H), 6.55 (d, *J* = 15.6 Hz, 1H), 6.40 (d, *J* = 16.0 Hz, 1H), 6.19 (d, *J* = 16.0 Hz, 1H), 5.63 (s, 1H), 5.34 (s, 1H), 3.82

(td,  $J_1 = 9.2$  Hz,  $J_2 = 4.8$  Hz, 1H), 3.53-3.46 (m, 1H), 2.94-2.85 (m, 1H), 2.76-2.68 (m, 1H), 2.10 (s, 3H).  $^{13}\text{C}\{^1\text{H}\}$  NMR ( $\text{CDCl}_3$ , 150 MHz):  $\delta$  164.0, 147.0, 142.9, 136.5, 136.2, 135.7, 134.8, 133.4, 130.0, 129.2, 128.8, 128.7, 128.4, 128.3, 127.0, 126.8, 125.4, 123.4, 120.8, 118.9, 105.4, 65.4, 49.1, 35.0, 24.4. HRMS (ESI)  $m/z$ :  $[\text{M}+\text{Na}]^+$  Calcd for  $\text{C}_{30}\text{H}_{25}\text{N}_3\text{NaO}$  466.1890; Found 466.1872.

**9-Methyl-5-((*E*)-4-phenylbuta-1,3-dien-2-yl)-9-((*E*)-styryl)-7-(trifluoromethyl)-2,3-dihydro-1*H*,9*H*-pyrazolo[1,2-*a*]indazol-1-one (4i)**

Eluent: petroleum ether/ethyl acetate (3:1). Yellow solid (46.4 mg, 48%), mp 109.3-110.3 °C.  $^1\text{H}$  NMR ( $\text{CDCl}_3$ , 600 MHz):  $\delta$  7.40-7.38 (m, 3H), 7.36-7.34 (m, 3H), 7.33-7.28 (m, 4H), 7.26-7.23 (m, 2H), 7.00 (d,  $J = 16.2$  Hz, 1H), 6.57 (d,  $J = 16.2$  Hz, 1H), 6.42 (d,  $J = 16.2$  Hz, 1H), 6.23 (d,  $J = 15.6$  Hz, 1H), 5.62 (s, 1H), 5.36 (s, 1H), 3.81 (td,  $J_1 = 9.0$  Hz,  $J_2 = 4.8$  Hz, 1H), 3.46-3.41 (m, 1H), 2.91-2.86 (m, 1H), 2.72-2.67 (m, 1H), 2.12 (s, 3H).  $^{13}\text{C}\{^1\text{H}\}$  NMR ( $\text{CDCl}_3$ , 150 MHz):  $\delta$  164.3, 146.6, 143.7, 136.4, 136.2, 136.0, 133.2, 129.7, 129.5, 128.8, 128.6, 128.3, 128.1, 127.8 (q,  $^3J_{\text{C-F}} = 3.3$  Hz), 127.0, 126.8, 125.0 (q,  $^2J_{\text{C-F}} = 32.6$  Hz), 124.2 (q,  $^1J_{\text{C-F}} = 270.3$  Hz), 123.2, 120.5, 118.9 (q,  $^3J_{\text{C-F}} = 4.4$  Hz), 65.5, 49.8, 35.1, 24.3.  $^{19}\text{F}$  NMR (565 MHz,  $\text{CDCl}_3$ ):  $\delta$  -61.20 (s). HRMS (ESI)  $m/z$ :  $[\text{M}+\text{Na}]^+$  Calcd for  $\text{C}_{30}\text{H}_{25}\text{F}_3\text{N}_2\text{NaO}$  509.1811; Found 509.1803.

**6-Fluoro-9-methyl-5-((*E*)-4-phenylbuta-1,3-dien-2-yl)-9-((*E*)-styryl)-2,3-dihydro-1*H*,9*H*-pyrazolo[1,2-*a*]indazol-1-one (4j)**

Eluent: petroleum ether/ethyl acetate (3:1). Yellow solid (35.7 mg, 41%), mp 91.5-92.4 °C.  $^1\text{H}$  NMR ( $\text{CDCl}_3$ , 600 MHz, 55 °C):  $\delta$  7.39-7.35 (m, 4H), 7.31-7.22 (m, 6H), 7.07 (dd,  $J_1 = 8.4$  Hz,  $J_2 = 4.8$  Hz, 1H), 7.03 (d,  $J = 16.2$  Hz, 1H), 6.81 (t,  $J = 9.0$  Hz, 1H), 6.54 (d,  $J = 15.6$  Hz, 1H), 6.46 (d,  $J = 16.2$  Hz, 1H), 6.26 (d,  $J = 16.2$  Hz, 1H), 5.73 (s, 1H), 5.39 (s, 1H), 3.76 (br s, 1H), 3.42-3.41 (m, 1H), 2.87-2.81 (m, 1H), 2.69-2.64 (m, 1H), 2.08 (s, 3H).  $^{13}\text{C}\{^1\text{H}\}$  NMR ( $\text{CDCl}_3$ , 100 MHz):  $\delta$  164.2, 160.3 (d,  $^1J_{\text{C-F}} = 244.5$  Hz), 136.5, 136.2, 132.4, 130.8, 130.2, 129.3, 128.7, 128.6, 128.1, 128.0, 126.9, 126.8, 122.7 (d,  $^3J_{\text{C-F}} = 10.2$  Hz), 121.7, 111.6 (d,  $^2J_{\text{C-F}}$

= 23.1 Hz), 109.7 (d,  $^2J_{C-F}$  = 24.6 Hz), 65.3, 50.7, 35.3, 24.6.  $^{19}\text{F}$  NMR (565 MHz,  $\text{CDCl}_3$ ):  $\delta$  -116.10 (s).

HRMS (ESI)  $m/z$ :  $[\text{M}+\text{H}]^+$  Calcd for  $\text{C}_{29}\text{H}_{25}\text{FN}_2\text{NaO}$  459.1843; Found 459.1823.

**2,2,9-Trimethyl-5-((*E*)-4-phenylbuta-1,3-dien-2-yl)-9-((*E*)-styryl)-2,3-dihydro-1*H*,9*H*-pyrazolo[1,2-*a*]indazol-1-one (4k)**

Eluent: petroleum ether/ethyl acetate (5:1). Yellow solid (40.1 mg, 45%), mp 114.0-114.9 °C.  $^1\text{H}$  NMR ( $\text{CDCl}_3$ , 400 MHz):  $\delta$  7.39-7.34 (m, 3H), 7.33-7.31 (m, 2H), 7.30-7.27 (m, 3H), 7.25-7.21 (m, 3H), 7.16-7.11 (m, 2H), 7.05 (t,  $J$  = 7.2 Hz, 1H), 6.97 (d,  $J$  = 16.0 Hz, 1H), 6.53 (d,  $J$  = 15.6 Hz, 1H), 6.41 (d,  $J$  = 15.6 Hz, 1H), 6.34 (d,  $J$  = 16.4 Hz, 1H), 5.56 (s, 1H), 5.34 (d,  $J$  = 1.6 Hz, 1H), 3.54 (d,  $J$  = 8.4 Hz, 1H), 3.07 (d,  $J$  = 8.8 Hz, 1H), 2.10 (s, 3H), 1.25 (s, 3H), 1.17 (s, 3H).  $^{13}\text{C}\{^1\text{H}\}$  NMR ( $\text{CDCl}_3$ , 150 MHz):  $\delta$  169.8, 144.8, 143.9, 136.9, 136.4, 135.5, 132.9, 130.5, 130.2, 128.7, 128.6, 128.5, 128.4, 127.9, 127.8, 126.9, 126.7, 123.3, 122.5, 121.6, 119.7, 65.3, 63.3, 45.5, 24.4, 22.8, 22.3. HRMS (ESI)  $m/z$ :  $[\text{M}+\text{Na}]^+$  Calcd for  $\text{C}_{31}\text{H}_{30}\text{N}_2\text{NaO}$  469.2250; Found 469.2236.

**2,9-Dimethyl-5-((*E*)-4-phenylbuta-1,3-dien-2-yl)-9-((*E*)-styryl)-2,3-dihydro-1*H*,9*H*-pyrazolo[1,2-*a*]indazol-1-one (4l, dr = 1.1:1)**

**4l-1:** Eluent: petroleum ether/ethyl acetate (5:1). Yellow solid (19.0 mg, 22%), mp 57.2-58.2 °C.  $^1\text{H}$  NMR ( $\text{CDCl}_3$ , 400 MHz):  $\delta$  7.37-6.98 (m, 14H), 6.50 (d,  $J$  = 16.0 Hz, 1H), 6.39 (d,  $J$  = 16.0 Hz, 1H), 6.29 (d,  $J$  = 16.0 Hz, 1H), 5.57 (s, 1H), 5.33 (s, 1H), 4.07 (t,  $J$  = 8.4 Hz, 1H), 3.06-3.03 (m, 1H), 2.78 (dd,  $J_1$  = 12.0 Hz,  $J_2$  = 8.8 Hz, 1H), 2.16 (s, 3H), 1.19 (d,  $J$  = 7.2 Hz, 3H).  $^{13}\text{C}\{^1\text{H}\}$  NMR ( $\text{CDCl}_3$ , 100 MHz):  $\delta$  167.2, 144.7, 144.1, 136.8, 136.3, 135.5, 132.8, 130.4, 130.2, 128.7, 128.5, 127.9, 127.8, 126.84, 126.76, 123.6, 122.7, 121.6, 119.7, 65.6, 58.2, 40.6, 24.6, 13.4. HRMS (ESI)  $m/z$ :  $[\text{M}+\text{Na}]^+$  Calcd for  $\text{C}_{30}\text{H}_{28}\text{N}_2\text{NaO}$  455.2094; Found 455.2100.

**4l-2:** Eluent: petroleum ether/ethyl acetate (5:1). Yellow solid (17.4 mg, 20%), mp 57.7-58.7 °C.  $^1\text{H}$  NMR ( $\text{CDCl}_3$ , 400 MHz):  $\delta$  7.42-7.21 (m, 10H), 7.12-6.68 (m, 4H), 6.62 (d,  $J$  = 16.0 Hz, 1H), 6.53 (dd,  $J_1$  = 16.0 Hz,



$J_2 = 2.0$  Hz, 1H), 6.32 (d,  $J = 16.0$  Hz, 1H), 5.58 (s, 1H), 5.34 (s, 1H), 3.75 (t,  $J = 8.0$  Hz, 1H), 3.14 (t,  $J = 7.6$  Hz, 1H), 2.92-2.86 (m, 1H), 1.99 (s, 3H), 1.24-1.23 (m, 3H).  $^{13}\text{C}\{^1\text{H}\}$  NMR ( $\text{CDCl}_3$ , 100 MHz):  $\delta$  167.3, 144.8, 144.2, 136.9, 136.4, 135.6, 132.8, 130.7, 130.2, 129.4, 128.9, 128.7, 128.5, 127.9, 127.8, 126.9, 126.7, 123.4, 122.6, 122.0, 119.8, 65.1, 57.7, 41.1, 24.4, 14.3. HRMS (ESI)  $m/z$ :  $[\text{M}+\text{Na}]^+$  Calcd for  $\text{C}_{30}\text{H}_{28}\text{N}_2\text{NaO}$  455.2094; Found 455.2090.

**9-Methyl-9-((*E*)-4-methylstyryl)-5-((*E*)-4-(*p*-tolyl)buta-1,3-dien-2-yl)-2,3-dihydro-1*H*,9*H*-pyrazolo[1,2-*a*]indazol-1-one (4m)**

Eluent: petroleum ether/ethyl acetate (3:1). Yellow solid (63.9 mg, 72%), mp 48.4-49.4 °C.  $^1\text{H}$  NMR ( $\text{CDCl}_3$ , 600 MHz):  $\delta$  7.28 (d,  $J = 8.4$  Hz, 2H), 7.25-7.24 (m, 2H), 7.13-7.05 (m, 7H), 6.96 (d,  $J = 15.6$  Hz, 1H), 6.51 (d,  $J = 16.2$  Hz, 1H), 6.39 (d,  $J = 16.2$  Hz, 1H), 6.26 (d,  $J = 16.2$  Hz, 1H), 5.53 (s, 1H), 5.29 (d,  $J = 1.8$  Hz, 1H), 3.76 (td,  $J_1 = 9.0$  Hz,  $J_2 = 4.2$  Hz, 1H), 3.36-3.31 (m, 1H), 2.88-2.82 (m, 1H), 2.66-2.62 (m, 1H), 2.32 (s, 6H), 2.08 (s, 3H).  $^{13}\text{C}\{^1\text{H}\}$  NMR ( $\text{CDCl}_3$ , 150 MHz):  $\delta$  164.4, 144.8, 144.2, 138.0, 137.7, 135.6, 134.0, 133.6, 132.7, 130.2, 129.5, 129.4, 129.2, 129.0, 128.1, 126.8, 126.7, 123.6, 122.7, 121.8, 119.2, 65.5, 50.8, 35.3, 24.5, 21.3, 21.2. HRMS (ESI)  $m/z$ :  $[\text{M}+\text{Na}]^+$  Calcd for  $\text{C}_{31}\text{H}_{30}\text{N}_2\text{NaO}$  469.2250; Found 469.2243.

**5-((*E*)-4-(4-Fluorophenyl)buta-1,3-dien-2-yl)-9-((*E*)-4-fluorostyryl)-9-methyl-2,3-dihydro-1*H*,9*H*-pyrazolo[1,2-*a*]indazol-1-one (4n)**

Eluent: petroleum ether/ethyl acetate (3:1). Yellow solid (54.1 mg, 60%), mp 140.2-150.2 °C.  $^1\text{H}$  NMR ( $\text{CDCl}_3$ , 600 MHz):  $\delta$  7.36-7.33 (m, 2H), 7.30 (dd,  $J_1 = 9.0$  Hz,  $J_2 = 5.4$  Hz, 2H), 7.14 (dd,  $J_1 = 7.2$  Hz,  $J_2 = 1.8$  Hz, 1H), 7.11 (dd,  $J_1 = 7.8$  Hz,  $J_2 = 1.8$  Hz, 1H), 7.08 (t,  $J = 7.2$  Hz, 1H), 7.00-6.95 (m, 4H), 6.92 (d,  $J = 16.2$  Hz, 1H), 6.51 (d,  $J = 16.2$  Hz, 1H), 6.37 (d,  $J = 15.6$  Hz, 1H), 6.23 (d,  $J = 15.6$  Hz, 1H), 5.56 (s, 1H), 5.33 (d,  $J = 1.2$  Hz, 1H), 3.76 (td,  $J_1 = 8.4$  Hz,  $J_2 = 4.2$  Hz, 1H), 3.38-3.33 (m, 1H), 2.89-2.83 (m, 1H), 2.69-2.64 (m, 1H), 2.09 (s, 3H).  $^{13}\text{C}\{^1\text{H}\}$  NMR ( $\text{CDCl}_3$ , 150 MHz):  $\delta$  164.5, 162.52 (d,  $^1J_{\text{C-F}} = 245.3$  Hz), 162.49 (d,  $^1J_{\text{C-F}} = 245.6$  Hz), 144.5, 144.2, 135.4, 133.0 (d,  $^4J_{\text{C-F}} = 3.2$  Hz), 132.5 (d,  $^4J_{\text{C-F}} = 3.5$  Hz), 131.5,

130.3, 130.2, 128.8, 128.4 (d,  $^3J_{C-F} = 8.1$  Hz), 128.3 (d,  $^3J_{C-F} = 7.2$  Hz), 127.9, 123.4, 122.9, 121.8, 119.8, 115.6 (d,  $^2J_{C-F} = 21.5$  Hz), 115.5 (d,  $^2J_{C-F} = 21.2$  Hz), 65.4, 50.8, 35.3, 24.4.  $^{19}\text{F}$  NMR (565 MHz,  $\text{CDCl}_3$ ):  $\delta$ : -113.48 – -113.53 (m), -114.00 – -114.05 (m). HRMS (ESI)  $m/z$ :  $[\text{M}+\text{Na}]^+$  Calcd for  $\text{C}_{29}\text{H}_{24}\text{F}_2\text{N}_2\text{NaO}$  477.1749; Found 477.1740.

**5-((*E*)-4-(4-Bromophenyl)buta-1,3-dien-2-yl)-9-((*E*)-4-bromostyryl)-9-methyl-2,3-dihydro-1*H*,9*H*-pyrazolo[1,2-*a*]indazol-1-one (4o)**

Eluent: petroleum ether/ethyl acetate (3:1). Yellow solid (66.3 mg, 58%), mp 114.6-115.6 °C.  $^1\text{H}$  NMR ( $\text{CDCl}_3$ , 400 MHz):  $\delta$  7.43-7.39 (m, 4H), 7.26-7.23 (m, 2H), 7.19 (d,  $J = 8.4$  Hz, 2H), 7.15-7.13 (m, 1H), 7.11-7.06 (m, 2H), 6.98 (d,  $J = 16.0$  Hz, 1H), 6.49 (d,  $J = 15.6$  Hz, 1H), 6.42 (d,  $J = 16.0$  Hz, 1H), 6.20 (d,  $J = 16.0$  Hz, 1H), 5.59 (s, 1H), 5.36 (d,  $J = 0.8$  Hz, 1H), 3.76 (td,  $J_1 = 8.8$  Hz,  $J_2 = 4.4$  Hz, 1H), 3.37-3.30 (m, 1H), 2.91-2.82 (m, 1H), 2.70-2.62 (m, 1H), 2.08 (s, 3H).  $^{13}\text{C}\{^1\text{H}\}$  NMR ( $\text{CDCl}_3$ , 150 MHz):  $\delta$  164.5, 144.4, 144.2, 135.7, 135.30, 135.27, 131.8, 131.7, 131.5, 131.2, 130.3, 129.6, 128.4, 128.2, 127.9, 123.3, 122.9, 121.9, 121.8, 121.7, 120.5, 65.4, 50.8, 35.3, 24.4. HRMS (ESI)  $m/z$ :  $[\text{M}+\text{Na}]^+$  Calcd for  $\text{C}_{29}\text{H}_{24}\text{Br}_2\text{N}_2\text{NaO}$  597.0148; Found 597.0164.

**4-((*E*)-2-(5-((*E*)-4-(4-Cyanophenyl)buta-1,3-dien-2-yl)-9-methyl-1-oxo-2,3-dihydro-1*H*,9*H*-pyrazolo[1,2-*a*]indazol-9-yl)vinyl)benzotrile (4p)**

Eluent: petroleum ether/ethyl acetate (3:1). Yellow solid (40.8 mg, 43%), mp 170.5-171.5 °C.  $^1\text{H}$  NMR ( $\text{CDCl}_3$ , 600 MHz):  $\delta$  7.59-7.55 (m, 4H), 7.46 (d,  $J = 8.4$  Hz, 2H), 7.41 (d,  $J = 8.4$  Hz, 2H), 7.16-7.14 (m, 1H), 7.12-7.09 (m, 3H), 6.60-6.54 (m, 2H), 6.26 (d,  $J = 16.2$  Hz, 1H), 5.68 (s, 1H), 5.45 (s, 1H), 3.75 (td,  $J_1 = 8.4$  Hz,  $J_2 = 4.2$  Hz, 1H), 3.37-3.33 (m, 1H), 2.89-2.83 (m, 1H), 2.70-2.66 (m, 1H), 2.08 (s, 3H).  $^{13}\text{C}\{^1\text{H}\}$  NMR ( $\text{CDCl}_3$ , 150 MHz):  $\delta$  164.7, 144.2, 144.0, 141.2, 140.8, 135.0, 134.3, 132.54, 132.45, 132.4, 130.8, 130.5, 127.5, 127.4, 127.1, 123.2, 122.9, 122.4, 122.0, 118.8, 111.2, 111.1, 65.4, 51.0, 35.2, 24.4. HRMS (ESI)  $m/z$ :  $[\text{M}+\text{Na}]^+$  Calcd for  $\text{C}_{31}\text{H}_{24}\text{N}_4\text{NaO}$  491.1842; Found 491.1839.

**9-Methyl-9-((E)-3-methylstyryl)-5-((E)-4-(m-tolyl)buta-1,3-dien-2-yl)-2,3-dihydro-1H,9H-pyrazolo[1,2-a]indazol-1-one (4q)**

Eluent: petroleum ether/ethyl acetate (3:1). Yellow solid (57.7 mg, 65%), mp 93.9-94.9 °C. <sup>1</sup>H NMR (CDCl<sub>3</sub>, 600 MHz): δ 7.25 (s, 1H), 7.21-7.19 (m, 4H), 7.16-7.15 (m, 2H), 7.13 (dd, *J*<sub>1</sub> = 7.8 Hz, *J*<sub>2</sub> = 1.8 Hz, 1H), 7.09 (t, *J* = 7.2 Hz, 1H), 7.07-7.06 (m, 2H), 7.02 (d, *J* = 16.2 Hz, 1H), 6.53 (d, *J* = 16.2 Hz, 1H), 6.47 (d, *J* = 15.6 Hz, 1H), 6.28 (d, *J* = 16.2 Hz, 1H), 5.58 (s, 1H), 5.34 (d, *J* = 1.2 Hz, 1H), 3.79 (td, *J*<sub>1</sub> = 9.0 Hz, *J*<sub>2</sub> = 4.8 Hz, 1H), 3.38-3.34 (m, 1H), 2.91-2.85 (m, 1H), 2.69-2.64 (m, 1H), 2.34 (s, 3H), 2.30 (s, 3H), 2.12 (s, 3H). <sup>13</sup>C{<sup>1</sup>H} NMR (CDCl<sub>3</sub>, 150 MHz): δ 164.4, 144.8, 144.3, 138.3, 138.1, 136.7, 136.3, 135.5, 133.0, 130.27, 130.26, 129.2, 128.8, 128.73, 128.65, 128.6, 128.4, 127.7, 127.5, 124.1, 123.8, 123.5, 122.8, 121.8, 119.6, 65.5, 50.8, 35.3, 24.4, 21.4, 21.3. HRMS (ESI) *m/z*: [M+Na]<sup>+</sup> Calcd for C<sub>31</sub>H<sub>30</sub>N<sub>2</sub>NaO 469.2250; Found 469.2251.

**5-((E)-4-(3-Chlorophenyl)buta-1,3-dien-2-yl)-9-((E)-3-chlorostyryl)-9-methyl-2,3-dihydro-1H,9H-pyrazolo[1,2-a]indazol-1-one (4r)**

Eluent: petroleum ether/ethyl acetate (3:1). Yellow solid (49.5 mg, 51%), mp 138.9-139.9 °C. <sup>1</sup>H NMR (CDCl<sub>3</sub>, 400 MHz): δ 7.38 (s, 1H), 7.35 (s, 1H), 7.25-7.18 (m, 6H), 7.15-7.06 (m, 3H), 7.00 (d, *J* = 16.0 Hz, 1H), 6.51 (d, *J* = 16.0 Hz, 1H), 6.44 (d, *J* = 15.6 Hz, 1H), 6.20 (d, *J* = 16.0 Hz, 1H), 5.61 (s, 1H), 5.37 (d, *J* = 1.2 Hz, 1H), 3.76 (td, *J*<sub>1</sub> = 8.4 Hz, *J*<sub>2</sub> = 4.4 Hz, 1H), 3.37-3.31 (m, 1H), 2.92-2.83 (m, 1H), 2.70-2.63 (m, 1H), 2.09 (s, 3H). <sup>13</sup>C{<sup>1</sup>H} NMR (CDCl<sub>3</sub>, 100 MHz): δ 164.6, 144.4, 144.2, 138.7, 138.2, 135.3, 134.7, 134.5, 131.9, 131.4, 130.3, 130.2, 129.9, 129.8, 127.9, 127.81, 127.75, 126.7, 126.5, 125.1, 125.0, 123.2, 123.0, 121.9, 120.8, 65.4, 50.8, 35.2, 24.3. HRMS (ESI) *m/z*: [M+Na]<sup>+</sup> Calcd for C<sub>29</sub>H<sub>24</sub>Cl<sub>2</sub>N<sub>2</sub>NaO 509.1158; Found 509.1164.

**9-Methyl-9-((E)-2-methylstyryl)-5-((E)-4-(o-tolyl)buta-1,3-dien-2-yl)-2,3-dihydro-1H,9H-pyrazolo[1,2-a]indazol-1-one (4s)**

Eluent: petroleum ether/ethyl acetate (3:1). Yellow solid (53.8 mg, 60%), mp 131.7-132.7 °C. <sup>1</sup>H NMR (CDCl<sub>3</sub>, 400 MHz): δ 7.53 (d, *J* = 7.2 Hz, 1H), 7.43-7.41 (m, 1H), 7.20-7.06 (m, 9H), 6.86 (d, *J* = 16.0 Hz, 1H), 6.76 (d, *J* = 15.6 Hz, 1H), 6.56 (d, *J* = 16.0 Hz, 1H), 6.35 (dd, *J*<sub>1</sub> = 16.0 Hz, *J*<sub>2</sub> = 1.2 Hz, 1H), 5.56 (s, 1H), 5.34 (s, 1H), 3.75 (td, *J*<sub>1</sub> = 8.4 Hz, *J*<sub>2</sub> = 4.4 Hz, 1H), 3.43-3.36 (m, 1H), 2.88-2.80 (m, 1H), 2.71-2.64 (m, 1H), 2.29 (s, 3H), 2.11-2.10 (m, 6H). <sup>13</sup>C{<sup>1</sup>H} NMR (CDCl<sub>3</sub>, 100 MHz): δ 164.4, 145.3, 143.9, 136.2, 135.9, 135.7, 135.4, 135.3, 131.8, 130.8, 130.4, 130.3, 130.2, 129.2, 127.8, 127.7, 127.2, 126.12, 126.07, 126.0, 125.2, 123.6, 122.9, 121.9, 119.6, 65.6, 50.7, 35.4, 24.6, 19.7, 19.6. HRMS (ESI) *m/z*: [M+Na]<sup>+</sup> Calcd for C<sub>31</sub>H<sub>30</sub>N<sub>2</sub>NaO 469.2250; Found 469.2253.

**5-((*E*)-4-(2-Fluorophenyl)buta-1,3-dien-2-yl)-9-((*E*)-2-fluorostyryl)-9-methyl-2,3-dihydro-1*H*,9*H*-pyrazolo[1,2-*a*]indazol-1-one (4t)**

Eluent: petroleum ether/ethyl acetate (3:1). Yellow solid (38.1 mg, 42%), mp 84.6-85.6 °C. <sup>1</sup>H NMR (CDCl<sub>3</sub>, 600 MHz): δ 7.47 (td, *J*<sub>1</sub> = 7.8 Hz, *J*<sub>2</sub> = 1.8 Hz, 1H), 7.43 (td, *J*<sub>1</sub> = 7.8 Hz, *J*<sub>2</sub> = 1.2 Hz, 1H), 7.22-7.18 (m, 2H), 7.14 (dd, *J*<sub>1</sub> = 7.8 Hz, *J*<sub>2</sub> = 1.8 Hz, 1H), 7.12 (dd, *J*<sub>1</sub> = 7.8 Hz, *J*<sub>2</sub> = 1.8 Hz, 1H), 7.09-7.06 (m, 4H), 7.03-6.99 (m, 2H), 6.73 (d, *J* = 16.2 Hz, 1H), 6.57 (d, *J* = 16.2 Hz, 1H), 6.43 (d, *J* = 16.2 Hz, 1H), 5.61 (s, 1H), 5.38 (d, *J* = 1.2 Hz, 1H), 3.74 (td, *J*<sub>1</sub> = 9.0 Hz, *J*<sub>2</sub> = 4.8 Hz, 1H), 3.42-3.37 (m, 1H), 2.88-2.83 (m, 1H), 2.71-2.66 (m, 1H), 2.09 (s, 3H). <sup>13</sup>C{<sup>1</sup>H} NMR (CDCl<sub>3</sub>, 150 MHz): δ 164.5, 160.5 (d, <sup>1</sup>*J*<sub>C-F</sub> = 248.6 Hz), 160.4 (d, <sup>1</sup>*J*<sub>C-F</sub> = 248.1 Hz), 144.8, 144.3, 135.3, 132.8 (d, <sup>4</sup>*J*<sub>C-F</sub> = 3.9 Hz), 131.5, 130.3, 129.1 (d, <sup>3</sup>*J*<sub>C-F</sub> = 9.5 Hz), 127.9 (d, <sup>3</sup>*J*<sub>C-F</sub> = 8.1 Hz), 127.8 (d, <sup>3</sup>*J*<sub>C-F</sub> = 8.7 Hz), 125.5, 124.8 (d, <sup>2</sup>*J*<sub>C-F</sub> = 11.6 Hz), 124.23, 124.16 (d, <sup>4</sup>*J*<sub>C-F</sub> = 3.6 Hz), 124.0 (d, <sup>4</sup>*J*<sub>C-F</sub> = 3.2 Hz), 123.2, 122.9, 122.0, 121.7 (d, <sup>4</sup>*J*<sub>C-F</sub> = 3.3 Hz), 120.6, 115.9 (d, <sup>2</sup>*J*<sub>C-F</sub> = 21.9 Hz), 115.7 (d, <sup>2</sup>*J*<sub>C-F</sub> = 22.8 Hz), 65.6, 50.9, 35.3, 24.3. <sup>19</sup>F NMR (565 MHz, CDCl<sub>3</sub>): δ: -116.73 (s), -117.45 – -117.49 (m). HRMS (ESI) *m/z*: [M+Na]<sup>+</sup> Calcd for C<sub>29</sub>H<sub>24</sub>F<sub>2</sub>N<sub>2</sub>NaO 477.1749; Found 477.1736.

**3. Typical procedure for the synthesis of 5a and spectroscopic data of 5a-5d**

To a reaction tube equipped with a stir bar were charged with 1-phenylpyrazolidin-3-one (**1a**, 64.8 mg, 0.4 mmol), DCE (2 mL), [RhCp\*Cl<sub>2</sub>]<sub>2</sub> (3.1 mg, 0.005 mmol), NaOAc (8.2 mg, 0.1 mmol) and 1-phenylbuta-2,3-dien-1-yl acetate (**2a**, 37.6 mg, 0.2 mmol). The tube was then sealed, and the mixture was stirred at room temperature under argon for 2 h. Upon completion, it was quenched with water and extracted with dichloromethane (10 mL × 3). The combined organic phases were dried over anhydrous Na<sub>2</sub>SO<sub>4</sub>, filtered and concentrated under reduced pressure. To the residue were added manganese dioxide (34.8 mg, 0.4 mmol) and acetic acid (2 mL). The resulting mixture was stirred at 100 °C for 12 h. Upon completion, it was cooled to room temperature, diluted with water, and extracted with dichloromethane (10 mL × 3). The organic layer was dried over anhydrous Na<sub>2</sub>SO<sub>4</sub>, filtered, and concentrated under reduced pressure. The residue was purified by silica gel column chromatography using petroleum ethyl acetate/methanol (20:1) as eluent to afford **5a**. **5b-5d** were obtained in a similar manner.

**(E)-9-Methyl-9-styryl-1H,9H-pyrazolo[1,2-a]indazol-1-one (5a)**

Eluent: ethyl acetate/methanol (20:1). Yellow solid (23.1 mg, 40%), mp 50.7-51.7 °C. <sup>1</sup>H NMR (CDCl<sub>3</sub>, 400 MHz): δ 7.60 (d, *J* = 3.2 Hz, 1H), 7.37-7.34 (m, 3H), 7.31-7.19 (m, 4H), 7.16 (t, *J* = 7.6 Hz, 1H), 7.11 (d, *J* = 8.0 Hz, 1H), 6.66-6.58 (m, 2H), 5.61 (d, *J* = 3.6 Hz, 1H), 2.12 (s, 3H). <sup>13</sup>C{<sup>1</sup>H} NMR (CDCl<sub>3</sub>, 100 MHz): δ 161.8, 137.0, 135.9, 133.6, 130.5, 129.2, 128.5, 128.4, 128.1, 126.94, 126.92, 124.4, 123.9, 108.1, 100.5, 67.8, 24.2. HRMS (ESI) *m/z*: [M+Na]<sup>+</sup> Calcd for C<sub>19</sub>H<sub>16</sub>N<sub>2</sub>NaO 311.1155; Found 311.1147.

**(E)-7,9-Dimethyl-9-styryl-1H,9H-pyrazolo[1,2-a]indazol-1-one (5b)**

Eluent: ethyl acetate/methanol (20:1). Yellow solid (25.8 mg, 43%), mp 70.8-71.8 °C. <sup>1</sup>H NMR (CDCl<sub>3</sub>, 600 MHz): δ 7.55 (d, *J* = 3.6 Hz, 1H), 7.37 (d, *J* = 7.2 Hz, 2H), 7.28-7.26 (m, 2H), 7.21 (t, *J* = 7.2 Hz, 1H), 7.15 (d, *J* = 8.4 Hz, 1H), 7.09 (s, 1H), 6.99 (d, *J* = 7.8 Hz, 1H), 6.63 (d, *J* = 16.2 Hz, 1H), 6.59 (d, *J* = 15.6 Hz, 1H), 5.57 (d, *J* = 3.6 Hz, 1H), 2.38 (s, 3H), 2.10 (s, 3H). <sup>13</sup>C{<sup>1</sup>H} NMR (CDCl<sub>3</sub>, 150 MHz): δ 161.9, 137.3, 136.0,

134.5, 131.4, 130.4, 129.7, 128.6, 128.5, 128.1, 127.0, 126.7, 124.3, 107.8, 99.8, 67.7, 24.1, 21.2. HRMS (ESI)  $m/z$ :  $[M+Na]^+$  Calcd for  $C_{20}H_{18}N_2NaO$  325.1311; Found 325.1301.

**(E)-7-Bromo-9-methyl-9-styryl-1H,9H-pyrazolo[1,2-a]indazol-1-one (5c)**

Eluent: ethyl acetate/methanol (20:1). Yellow solid (23.3 mg, 32%), mp 60.9-61.9 °C.  $^1H$  NMR ( $CDCl_3$ , 600 MHz):  $\delta$  7.56 (d,  $J = 3.6$  Hz, 1H), 7.48 (dd,  $J_1 = 8.4$  Hz,  $J_2 = 1.8$  Hz, 1H), 7.40 (d,  $J = 1.8$  Hz, 1H), 7.38-7.37 (m, 2H), 7.30-7.28 (m, 2H), 7.25-7.24 (m, 1H), 6.98 (d,  $J = 8.4$  Hz, 1H), 6.63 (d,  $J = 16.2$  Hz, 1H), 6.55 (d,  $J = 16.2$  Hz, 1H), 5.63 (d,  $J = 3.6$  Hz, 1H), 2.11 (s, 3H).  $^{13}C\{^1H\}$  NMR ( $CDCl_3$ , 100 MHz):  $\delta$  161.7, 139.1, 135.6, 132.6, 132.2, 131.0, 128.6, 128.3, 127.8, 127.3, 127.1, 127.0, 116.8, 109.4, 101.3, 67.7, 24.1. HRMS (ESI)  $m/z$ :  $[M+Na]^+$  Calcd for  $C_{19}H_{15}BrN_2NaO$  389.0260; Found 389.0255.

**(E)-9-(4-Bromostyryl)-9-methyl-1H,9H-pyrazolo[1,2-a]indazol-1-one (5d)**

Eluent: ethyl acetate/methanol (20:1). Yellow solid (35.1 mg, 48%), mp 74.7-75.7 °C.  $^1H$  NMR ( $CDCl_3$ , 600 MHz):  $\delta$  7.59 (d,  $J = 3.6$  Hz, 1H), 7.38-7.33 (m, 3H), 7.28 (d,  $J = 7.2$  Hz, 1H), 7.21 (d,  $J = 8.4$  Hz, 2H), 7.15 (t,  $J = 7.2$  Hz, 1H), 7.10 (d,  $J = 7.8$  Hz, 1H), 6.60 (d,  $J = 16.2$  Hz, 1H), 6.54 (d,  $J = 16.2$  Hz, 1H), 5.59 (d,  $J = 3.6$  Hz, 1H), 2.09 (s, 3H).  $^{13}C\{^1H\}$  NMR ( $CDCl_3$ , 150 MHz):  $\delta$  161.8, 136.8, 134.9, 133.5, 131.6, 129.4, 129.3, 129.2, 128.5, 127.1, 124.5, 123.8, 121.9, 108.2, 100.5, 67.7, 24.1. HRMS (ESI)  $m/z$ :  $[M+Na]^+$  Calcd for  $C_{19}H_{15}BrN_2NaO$  389.0260; Found 389.0265.

#### 4. Typical procedure for the synthesis of 6a and spectroscopic data of 6a-6e

To a reaction tube equipped with a stir bar were charged with **4a** (83.6 mg, 0.2 mmol), toluene (2 mL), sulfur (32.0 mg, 0.125 mmol) and 4Å molecular sieve (33.4 mg). The tube was then sealed, and the mixture was stirred at 180 °C for 18 h. Upon completion, it was cooled to room temperature and concentrated under reduced pressure. The residue was purified by silical gel column chromatography with petroleum ether/ethyl acetate (2:1) as the eluent to give **6a**. **6b-6e** were obtained in a similar manner.

**(E)-9-Methyl-5-(5-phenylthiophen-3-yl)-9-styryl-2,3-dihydro-1H,9H-pyrazolo[1,2-a]indazol-1-one (6a)**

Eluent: petroleum ether/ethyl acetate (3:1). White solid (62.0 mg, 69%), mp 173.6-174.6 °C. <sup>1</sup>H NMR (CDCl<sub>3</sub>, 600 MHz): δ 7.65 (d, *J* = 7.2 Hz, 2H), 7.55 (s, 1H), 7.42-7.39 (m, 4H), 7.36 (s, 1H), 7.33-7.28 (m, 4H), 7.22 (t, *J* = 7.2 Hz, 1H), 7.13-7.11 (m, 2H), 6.57 (d, *J* = 16.2 Hz, 1H), 6.47 (d, *J* = 16.2 Hz, 1H), 3.63-3.60 (m, 1H), 3.19-3.15 (m, 1H), 2.89-2.83 (m, 1H), 2.65-2.61 (m, 1H), 2.10 (s, 3H). <sup>13</sup>C{<sup>1</sup>H} NMR (CDCl<sub>3</sub>, 150 MHz): δ 165.2, 144.9, 144.5, 139.2, 136.3, 135.7, 134.0, 130.6, 129.5, 129.3, 129.1, 128.5, 127.94, 127.89, 126.9, 125.9, 123.9, 123.5, 122.6, 121.8, 121.2, 65.8, 51.9, 35.1, 24.9. HRMS (ESI) *m/z*: [M+Na]<sup>+</sup> Calcd for C<sub>29</sub>H<sub>24</sub>N<sub>2</sub>NaOS 471.1502; Found 471.1508.

**(*E*)-7,9-Dimethyl-5-(5-phenylthiophen-3-yl)-9-styryl-2,3-dihydro-1*H*,9*H*-pyrazolo[1,2-*a*]indazol-1-one (6b)**

Eluent: petroleum ether/ethyl acetate (3:1). White solid (32.4 mg, 35%), mp 92.0-93.0 °C. <sup>1</sup>H NMR (CDCl<sub>3</sub>, 400 MHz): δ 7.65 (d, *J* = 7.2 Hz, 2H), 7.54 (d, *J* = 0.8 Hz, 1H), 7.42-7.38 (m, 4H), 7.35-7.28 (m, 4H), 7.22 (t, *J* = 7.2 Hz, 1H), 7.13 (s, 1H), 6.93 (s, 1H), 6.58 (d, *J* = 16.0 Hz, 1H), 6.46 (d, *J* = 16.0 Hz, 1H), 3.59 (td, *J*<sub>1</sub> = 8.8 Hz, *J*<sub>2</sub> = 4.4 Hz, 1H), 3.17-3.11 (m, 1H), 2.89-2.81 (m, 1H), 2.65-2.58 (m, 1H), 2.38 (s, 3H), 2.08 (s, 3H). <sup>13</sup>C{<sup>1</sup>H} NMR (CDCl<sub>3</sub>, 150 MHz): δ 165.3, 144.8, 142.4, 139.3, 136.3, 136.0, 134.0, 133.3, 130.7, 130.0, 129.2, 129.0, 128.5, 127.9, 127.8, 126.9, 125.9, 123.9, 122.5, 122.3, 121.0, 65.9, 52.3, 35.2, 24.8, 21.0. HRMS (ESI) *m/z*: [M+Na]<sup>+</sup> Calcd for C<sub>30</sub>H<sub>26</sub>N<sub>2</sub>NaOS 485.1658; Found 485.1661.

**(*E*)-7-Chloro-9-methyl-5-(5-phenylthiophen-3-yl)-9-styryl-2,3-dihydro-1*H*,9*H*-pyrazolo[1,2-*a*]indazol-1-one (6c)**

Eluent: petroleum ether/ethyl acetate (3:1). White solid (36.9 mg, 38%), mp 170.0-171.0 °C. <sup>1</sup>H NMR (CDCl<sub>3</sub>, 400 MHz): δ 7.65-7.63 (m, 2H), 7.51 (d, *J* = 1.6 Hz, 1H), 7.42-7.39 (m, 4H), 7.37 (d, *J* = 1.2 Hz, 1H), 7.34-7.28 (m, 4H), 7.25-7.22 (m, 1H), 7.08 (d, *J* = 2.0 Hz, 1H), 6.58 (d, *J* = 15.6 Hz, 1H), 6.42 (d, *J* = 16.0 Hz, 1H), 3.59 (td, *J*<sub>1</sub> = 8.8 Hz, *J*<sub>2</sub> = 4.4 Hz, 1H), 3.19-3.12 (m, 1H), 2.90-2.81 (m, 1H), 2.67-2.59 (m, 1H), 2.08 (s, 3H). <sup>13</sup>C{<sup>1</sup>H} NMR (CDCl<sub>3</sub>, 150 MHz): δ 165.2, 145.3, 143.2, 137.8, 137.5, 136.0, 133.8, 130.0, 129.8, 129.2,

129.1, 128.6, 128.5, 128.12, 128.08, 126.9, 125.9, 123.5, 123.1, 122.4, 121.8, 65.9, 51.9, 34.9, 24.8. HRMS (ESI)  $m/z$ :  $[M+Na]^+$  Calcd for  $C_{29}H_{23}ClN_2NaOS$  505.1112; Found 505.1108.

**(E)-9-Methyl-9-(4-methylstyryl)-5-(5-(*p*-tolyl)thiophen-3-yl)-2,3-dihydro-1*H*,9*H*-pyrazolo[1,2-*a*]indazol-1-one (6d)**

Eluent: petroleum ether/ethyl acetate (3:1). White solid (47.8 mg, 50%), mp 149.3-150.3 °C.  $^1H$  NMR ( $CDCl_3$ , 600 MHz):  $\delta$  7.54 (d,  $J = 8.4$  Hz, 2H), 7.50 (d,  $J = 1.2$  Hz, 1H), 7.31-7.27 (m, 4H), 7.20 (d,  $J = 7.8$  Hz, 2H), 7.12-7.09 (m, 4H), 6.52 (d,  $J = 16.2$  Hz, 1H), 6.42 (d,  $J = 16.2$  Hz, 1H), 3.61 (td,  $J_1 = 9.0$  Hz,  $J_2 = 4.8$  Hz, 1H), 3.18-3.14 (m, 1H), 2.88-2.82 (m, 1H), 2.64-2.59 (m, 1H), 2.37 (s, 3H), 2.31 (s, 3H), 2.08 (s, 3H).  $^{13}C\{^1H\}$  NMR ( $CDCl_3$ , 100 MHz):  $\delta$  165.2, 145.0, 144.5, 139.1, 137.9, 137.7, 135.8, 133.5, 131.2, 129.7, 129.6, 129.5, 129.2, 126.8, 125.8, 123.42, 123.41, 122.1, 121.8, 121.3, 65.9, 51.9, 35.1, 24.9, 21.2. HRMS (ESI)  $m/z$ :  $[M+Na]^+$  Calcd for  $C_{31}H_{28}N_2NaOS$  499.1815; Found 499.1835.

**(E)-5-(5-(4-Bromophenyl)thiophen-3-yl)-9-(4-bromostyryl)-9-methyl-2,3-dihydro-1*H*,9*H*-pyrazolo[1,2-*a*]indazol-1-one (6e)**

Eluent: petroleum ether/ethyl acetate (3:1). White solid (48.4 mg, 40%), mp 82.1-83.1 °C.  $^1H$  NMR ( $CDCl_3$ , 400 MHz):  $\delta$  7.54-7.49 (m, 5H), 7.42-7.37 (m, 3H), 7.32-7.28 (m, 1H), 7.26-7.24 (m, 2H), 7.13-7.12 (m, 2H), 6.51 (d,  $J = 16.0$  Hz, 1H), 6.45 (d,  $J = 15.6$  Hz, 1H), 3.60 (td,  $J_1 = 8.8$  Hz,  $J_2 = 4.4$  Hz, 1H), 3.19-3.13 (m, 1H), 2.91-2.82 (m, 1H), 2.67-2.59 (m, 1H), 2.08 (s, 3H).  $^{13}C\{^1H\}$  NMR ( $CDCl_3$ , 100 MHz):  $\delta$  165.3, 144.5, 143.6, 139.3, 135.6, 135.2, 132.9, 132.2, 131.6, 131.4, 129.6, 128.4, 128.2, 127.3, 124.2, 123.6, 123.0, 121.9, 121.8, 121.7, 121.0, 65.8, 52.0, 35.0, 24.8. HRMS (ESI)  $m/z$ :  $[M+Na]^+$  Calcd for  $C_{29}H_{22}Br_2N_2NaOS$  626.9712; Found 626.9704.

## 5. Typical procedure for the synthesis of 7a and spectroscopic data of 7a-7e

To a reaction tube equipped with a stir bar were charged with **4a** (83.6 mg, 0.2 mmol), toluene (2 mL) and dimethyl but-2-ynedioate (56.8 mg, 0.4 mmol). The tube was then sealed, and the mixture was stirred at



120 °C for 12 h. Upon completion, it was cooled to room temperature and concentrated under reduced pressure. The residue was purified by column chromatography on silica gel with petroleum ether/ethyl acetate (1:1) as the eluent to give **7a** as a mixture of two diastereoisomers. **7b-7e** were obtained in a similar manner.

**Dimethyl (E)-5-(9-methyl-1-oxo-9-styryl-2,3-dihydro-1H,9H-pyrazolo[1,2-a]indazol-5-yl)-1,4-dihydro-[1,1'-biphenyl]-2,3-dicarboxylate (7a)**

Eluent: petroleum ether/ethyl acetate (1:1). Yellow solid (88.6 mg, 79% , dr = 1:2.3). <sup>1</sup>H NMR (CDCl<sub>3</sub>, 600 MHz): δ 7.29-7.23 (m, 3H), 7.21-7.11 (m, 7H), 7.05-6.94 (m, 3H), 6.43-6.40 (m, 1H), 6.35-6.32 (m, 1H), 5.90-5.88 (m, 1H), 4.56-4.52 (m, 1H), 3.74-3.73 (m, 3H), 3.63-3.58 (m, 0.3H), 3.51-3.50 (m, 3H), 3.48-3.46 (m, 0.7H), 3.44-3.31 (m, 1.7H), 3.23-3.14 (m, 1.3H), 2.86-2.81 (m, 0.3H), 2.74-2.68 (m, 0.7H), 2.61-2.54 (m, 1H), 1.961-1.956 (m, 3H). <sup>13</sup>C{<sup>1</sup>H} NMR (CDCl<sub>3</sub>, 100 MHz): δ 167.9, 167.84, 167.75, 167.69, 165.0, 164.9, 144.0, 143.9, 140.8, 140.7, 136.2, 135.9, 135.7, 135.5, 135.4, 132.4, 131.7, 130.52, 130.47, 129.8, 129.6, 129.3, 128.95, 128.87, 128.52, 128.49, 128.4, 128.2, 127.9, 127.8, 127.5, 126.8, 125.2, 125.0, 123.3, 122.0, 121.9, 65.7, 65.6, 52.54, 52.50, 52.20, 52.18, 52.0, 45.2, 45.1, 35.1, 30.3, 24.9, 24.8. HRMS (ESI) *m/z*: [M+H]<sup>+</sup> Calcd for C<sub>35</sub>H<sub>32</sub>N<sub>2</sub>NaO<sub>5</sub> 583.2203; Found 583.2200.

**Dimethyl (E)-5-(7,9-dimethyl-1-oxo-9-styryl-2,3-dihydro-1H,9H-pyrazolo[1,2-a]indazol-5-yl)-1,4-dihydro-[1,1'-biphenyl]-2,3-dicarboxylate (7b)**

Eluent: petroleum ether/ethyl acetate (1:1). Yellow solid (92.9 mg, 81% , dr = 1:1). <sup>1</sup>H NMR (CDCl<sub>3</sub>, 600 MHz): δ 7.37-7.31 (m, 3H), 7.30-7.19 (m, 7H), 6.93 (s, 0.5H), 6.89 (s, 0.5H), 6.86 (s, 1H), 6.51 (d, *J* = 16.2 Hz, 1H), 6.39 (d, *J* = 16.2 Hz, 1H), 5.97-5.95 (m, 1H), 4.61 (br s, 1H), 3.81 (s, 3H), 3.782-3.775 (m, 0.5H), 3.70-3.65 (m, 0.5H), 3.58-3.57 (m, 3H), 3.52-3.38 (m, 1.5H), 3.26-3.17 (m, 1.5H), 2.90-2.86 (m, 0.5H), 2.80-2.74 (m, 0.5H), 2.67-2.61 (m, 1H), 2.31-2.30 (m, 3H), 2.02 (s, 3H). <sup>13</sup>C{<sup>1</sup>H} NMR (CDCl<sub>3</sub>, 150 MHz): δ 168.0, 167.83, 167.81, 167.7, 165.1, 165.0, 141.84, 141.81, 140.9, 140.8, 136.3, 136.0, 135.9, 135.8, 135.3, 133.2, 132.6, 131.8, 130.7, 130.6, 129.8, 129.6, 129.2, 128.95, 128.90, 128.87, 128.7, 128.51, 128.49, 128.27,

128.26, 127.9, 127.8, 127.7, 127.6, 127.4, 126.9, 125.1, 124.9, 122.5, 122.4, 65.7, 65.6, 52.5, 52.4, 52.3, 52.2, 52.1, 45.3, 45.1, 35.2, 30.4, 30.3, 24.8, 24.7, 20.95, 20.92. HRMS (ESI)  $m/z$ :  $[M+Na]^+$  Calcd for  $C_{36}H_{34}N_2NaO_5$  597.2360; Found 597.2375.

**Dimethyl (E)-5-(7-chloro-9-methyl-1-oxo-9-styryl-2,3-dihydro-1H,9H-pyrazolo[1,2-a]indazol-5-yl)-1,4-dihydro-[1,1'-biphenyl]-2,3-dicarboxylate (7c)**

Eluent: petroleum ether/ethyl acetate (1:1). Yellow solid (71.0 mg, 60%, dr = 1:1).  $^1H$  NMR ( $CDCl_3$ , 400 MHz):  $\delta$  7.30-7.11 (m, 10H), 7.03-6.98 (m, 1H), 6.95-6.94 (m, 1H), 6.46-6.41 (m, 1H), 6.28 (d,  $J$  = 16.0 Hz, 1H), 5.91-5.90 (m, 1H), 4.55-4.52 (m, 1H), 3.742-3.738 (m, 3H), 3.71-3.67 (m, 0.5H), 3.60-3.52 (m, 0.5H), 3.50-3.49 (m, 3H), 3.47-3.41 (m, 0.5H), 3.36-3.33 (m, 1H), 3.20-3.10 (m, 1.5H), 2.86-2.78 (m, 0.5H), 2.74-2.65 (m, 0.5H), 2.61-2.52 (m, 1H), 1.94-1.93 (m, 3H).  $^{13}C\{^1H\}$  NMR ( $CDCl_3$ , 150 MHz):  $\delta$  166.7, 166.6, 166.5, 163.9, 163.8, 141.64, 141.61, 139.4, 139.3, 136.5, 136.3, 134.89, 134.86, 134.4, 131.0, 130.3, 128.82, 128.76, 128.70, 128.68, 128.0, 127.9, 127.7, 127.64, 127.56, 127.53, 127.50, 127.40, 127.36, 127.2, 127.02, 126.99, 126.98, 126.54, 126.53, 125.8, 125.3, 125.1, 121.02, 120.96, 64.7, 64.6, 51.5, 51.17, 51.15, 50.9, 50.7, 44.2, 44.0, 33.9, 29.1, 29.0, 23.7, 23.6. HRMS (ESI)  $m/z$ :  $[M+Na]^+$  Calcd for  $C_{35}H_{31}ClN_2NaO_5$  617.1814; Found 617.1807.

**Dimethyl (E)-4'-methyl-5-(9-methyl-9-(4-methylstyryl)-1-oxo-2,3-dihydro-1H,9H-pyrazolo[1,2-a]indazol-5-yl)-1,4-dihydro-[1,1'-biphenyl]-2,3-dicarboxylate (7d)**

Eluent: petroleum ether/ethyl acetate (1:1). Yellow solid (74.5 mg, 63%, dr = 1:1).  $^1H$  NMR ( $CDCl_3$ , 400 MHz):  $\delta$  7.26-7.23 (m, 2H), 7.15-6.99 (m, 9H), 6.48-6.43 (m, 1H), 6.36 (d,  $J$  = 16.0 Hz, 1H), 5.95-5.93 (m, 1H), 4.61-4.54 (m, 1H), 3.81-3.80 (m, 3H), 3.73-3.62 (m, 0.5H), 3.59-3.58 (m, 3H), 3.56-3.52 (m, 1H), 3.46-3.41 (m, 1H), 3.37-3.18 (m, 1.5H), 2.95-2.86 (m, 0.5H), 2.83-2.74 (m, 0.5H), 2.69-2.60 (m, 1H), 2.32-2.30 (m, 6H), 2.03-2.02 (m, 3H).  $^{13}C\{^1H\}$  NMR ( $CDCl_3$ , 100 MHz):  $\delta$  167.9, 167.79, 167.76, 164.94, 164.86, 143.97, 143.95, 137.74, 137.70, 137.66, 137.11, 137.09, 136.2, 135.8, 135.6, 133.4, 132.1, 131.4,

129.62, 129.55, 129.53, 129.48, 129.4, 129.21, 129.18, 128.4, 128.2, 128.12, 128.09, 128.0, 127.9, 126.7, 125.3, 125.1, 123.30, 123.28, 122.0, 121.9, 65.72, 65.67, 52.5, 52.18, 52.16, 52.0, 51.9, 44.9, 44.7, 35.1, 30.3, 30.2, 24.90, 24.85, 21.2, 21.12, 21.11. HRMS (ESI)  $m/z$ :  $[M+Na]^+$  Calcd for  $C_{37}H_{36}N_2NaO_5$  611.2516; Found 611.2519.

**Dimethyl (*E*)-4'-bromo-5-(9-(4-bromostyryl)-9-methyl-1-oxo-2,3-dihydro-1*H*,9*H*-pyrazolo[1,2-*a*]indazol-5-yl)-1,4-dihydro-[1,1'-biphenyl]-2,3-dicarboxylate (7e)**

Eluent: petroleum ether/ethyl acetate (1:1). Yellow solid (105.9 mg, 74% , dr = 1:1).  $^1H$  NMR ( $CDCl_3$ , 400 MHz):  $\delta$  7.47-7.37 (m, 4H), 7.23-7.20 (m, 2H), 7.13-7.01 (m, 5H), 6.44 (d,  $J = 16.0$  Hz, 1H), 6.41-6.36 (m, 1H), 5.93-5.91 (m, 1H), 4.62-4.56 (m, 1H), 3.818-3.815 (m, 3H), 3.75-3.64 (m, 1H), 3.61-3.60 (m, 3H), 3.57-3.41 (m, 1.5H), 3.38-3.20 (m, 1.5H), 2.97-2.88 (m, 0.5H), 2.85-2.79 (m, 0.5H), 2.73-2.63 (m, 1H), 2.03 (s, 3H).  $^{13}C\{^1H\}$  NMR ( $CDCl_3$ , 150 MHz):  $\delta$  167.9, 167.7, 167.5, 167.3, 165.1, 165.0, 143.93, 143.86, 139.93, 139.87, 135.5, 135.3, 135.17, 135.15, 134.8, 134.3, 133.3, 132.6, 132.1, 132.0, 131.63, 131.61, 131.3, 131.2, 130.3, 130.0, 129.9, 128.5, 128.4, 128.23, 128.18, 127.3, 127.2, 125.0, 124.9, 123.5, 122.1, 122.0, 121.70, 121.69, 121.4, 65.7, 65.6, 52.6, 52.31, 52.29, 52.1, 51.9, 44.6, 44.4, 35.1, 35.0, 30.5, 30.3, 24.82, 24.75. HRMS (ESI)  $m/z$ :  $[M+Na]^+$  Calcd for  $C_{35}H_{30}Br_2N_2NaO_5$  739.0414; Found 739.0406.

## 6. Synthesis of 8 and its spectroscopic data

To a reaction tube equipped with a stir bar were charged with **4a** (41.8 mg, 0.1 mmol), toluene (2 mL) and *N*-methylmaleimide (22.2 mg, 0.2 mmol). The tube was then sealed, and the mixture was stirred at 120 °C for 12 h. Upon completion, it was cooled to room temperature and concentrated under reduced pressure. The residue was purified by column chromatography on silica gel with petroleum ether/ethyl acetate (1:2) as the eluent to give product **8** as a mixture of two diastereoisomers.

**(*E*)-2-Methyl-6-(9-methyl-1-oxo-9-styryl-2,3-dihydro-1*H*,9*H*-pyrazolo[1,2-*a*]indazol-5-yl)-4-phenyl-3a,4,7,7a-tetrahydro-1*H*-isoindole-1,3(2*H*)-dione (8)**

**8-1:** Eluent: petroleum ether/ethyl acetate (1:2). White solid (18.7 mg, 35%), mp 106.3-107.0 °C. <sup>1</sup>H NMR (CDCl<sub>3</sub>, 600 MHz): δ 7.40-7.37 (m, 4H), 7.33-7.26 (m, 5H), 7.22 (t, *J* = 7.8 Hz, 1H), 7.12-7.06 (m, 3H), 6.53 (d, *J* = 15.6 Hz, 1H), 6.50-6.49 (m, 1H), 6.45 (d, *J* = 16.2 Hz, 1H), 3.92 (t, *J* = 5.4 Hz, 1H), 3.65 (td, *J*<sub>1</sub> = 9.0 Hz, *J*<sub>2</sub> = 5.4 Hz, 1H), 3.46-3.43 (m, 1H), 3.40 (td, *J*<sub>1</sub> = 7.8 Hz, *J*<sub>2</sub> = 1.8 Hz, 1H), 3.34-3.30 (m, 1H), 3.24 (dd, *J*<sub>1</sub> = 16.8 Hz, *J*<sub>2</sub> = 2.4 Hz, 1H), 2.91-2.86 (m, 1H), 2.84-2.79 (m, 1H), 2.75 (s, 3H), 2.73-2.68 (m, 1H), 2.03 (s, 3H). <sup>13</sup>C{<sup>1</sup>H} NMR (CDCl<sub>3</sub>, 100 MHz): δ 177.8, 175.6, 163.6, 142.7, 137.5, 135.6, 135.2, 134.8, 129.5, 128.51, 128.46, 127.7, 127.5, 127.44, 127.1, 126.8, 126.4, 125.8, 124.1, 122.5, 120.9, 64.4, 50.0, 44.4, 41.2, 38.8, 33.9, 26.6, 23.7, 23.6. HRMS (ESI) *m/z*: [M+Na]<sup>+</sup> Calcd for C<sub>34</sub>H<sub>31</sub>N<sub>3</sub>NaO<sub>3</sub> 552.2258; Found 552.2269.

**8-2:** Eluent: petroleum ether/ethyl acetate (1:2). White solid (18.6 mg, 35%), mp 117.1-118.1 °C. <sup>1</sup>H NMR (CDCl<sub>3</sub>, 600 MHz): δ 7.30-7.27 (m, 4H), 7.24-7.17 (m, 5H), 7.13 (t, *J* = 7.2 Hz, 1H), 7.10 (dd, *J*<sub>1</sub> = 7.8 Hz, *J*<sub>2</sub> = 1.2 Hz, 1H), 7.04 (t, *J* = 7.8 Hz, 1H), 7.00 (dd, *J*<sub>1</sub> = 7.2 Hz, *J*<sub>2</sub> = 1.2 Hz, 1H), 6.43 (d, *J* = 16.2 Hz, 1H), 6.39-6.38 (m, 1H), 6.31 (d, *J* = 16.2 Hz, 1H), 3.84 (t, *J* = 5.4 Hz, 1H), 3.75 (td, *J*<sub>1</sub> = 8.4 Hz, *J*<sub>2</sub> = 3.6 Hz, 1H), 3.38-3.35 (m, 1H), 3.33-3.30 (m, 1H), 3.26 (dd, *J*<sub>1</sub> = 16.2 Hz, *J*<sub>2</sub> = 1.8 Hz, 1H), 3.13-3.08 (m, 1H), 2.86-2.80 (m, 1H), 2.70 (s, 3H), 2.62-2.57 (m, 2H), 1.99 (s, 3H). <sup>13</sup>C{<sup>1</sup>H} NMR (CDCl<sub>3</sub>, 150 MHz): δ 178.0, 175.4, 163.7, 143.2, 137.5, 135.3, 135.1, 134.9, 129.3, 128.7, 128.1, 127.8, 127.5, 127.4, 127.1, 126.8, 126.4, 125.8, 123.8, 122.6, 120.7, 64.5, 49.8, 44.9, 41.5, 39.2, 33.8, 27.5, 23.7, 23.6. HRMS (ESI) *m/z*: [M+Na]<sup>+</sup> Calcd for C<sub>34</sub>H<sub>31</sub>N<sub>3</sub>NaO<sub>3</sub> 552.2258; Found 552.2265.

## 7. Synthesis of 9 and its spectroscopic data

To a reaction tube equipped with a stir bar was charged with **4g** (99.2 mg, 0.2 mmol), dioxane (2 mL), Pd<sub>2</sub>(dba)<sub>3</sub> (18.3 mg, 0.02 mmol), DavePhos (11.8 mg, 0.03 mmol), <sup>t</sup>BuONa (38.4 mg, 0.4 mmol) and morpholine (52.3 mg, 0.6 mmol). The tube was then sealed, and the mixture was stirred at 100 °C under argon for 12 h. Upon completion, it was cooled to room temperature, diluted with dichloromethane (20 mL) and washed with water and brine. The organic layer was dried over anhydrous Na<sub>2</sub>SO<sub>4</sub>, filtered, and concentrated

under reduced pressure. The residue was purified by silica gel column chromatography with petroleum ether/ethyl acetate (2:1) as eluent to afford **9**.

**9-Methyl-7-morpholino-5-((E)-4-phenylbuta-1,3-dien-2-yl)-9-((E)-styryl)-2,3-dihydro-1H,9H-pyrazolo[1,2-a]indazol-1-one (9)**

Eluent: petroleum ether/ethyl acetate (2:1). Yellow solid (46.4 mg, 46%), mp 112.2-113.2 °C. <sup>1</sup>H NMR (CDCl<sub>3</sub>, 600 MHz): δ 7.39 (d, *J* = 7.2 Hz, 2H), 7.35 (d, *J* = 7.2 Hz, 2H), 7.33-7.28 (m, 4H), 7.23 (td, *J*<sub>1</sub> = 7.2 Hz, *J*<sub>2</sub> = 1.2 Hz, 2H), 6.99 (d, *J* = 16.2 Hz, 1H), 6.72 (s, 1H), 6.68 (s, 1H), 6.58 (d, *J* = 15.6 Hz, 1H), 6.43 (d, *J* = 15.6 Hz, 1H), 6.32 (d, *J* = 16.2 Hz, 1H), 5.56 (s, 1H), 5.33 (d, *J* = 1.2 Hz, 1H), 3.86 (t, *J* = 4.2 Hz, 4H), 3.69 (td, *J*<sub>1</sub> = 8.4 Hz, *J*<sub>2</sub> = 4.8 Hz, 1H), 3.31-3.26 (m, 1H), 3.13 (t, *J* = 4.2 Hz, 4H), 2.86-2.80 (m, 1H), 2.66-2.61 (m, 1H), 2.08 (s, 3H). <sup>13</sup>C{<sup>1</sup>H} NMR (CDCl<sub>3</sub>, 100 MHz): δ 164.7, 145.0, 136.8, 136.3, 132.9, 130.4, 129.1, 128.8, 128.7, 128.5, 128.0, 127.9, 126.9, 126.8, 124.3, 119.6, 118.1, 110.2, 66.9, 65.7, 51.7, 50.5, 35.4, 24.3. HRMS (ESI) *m/z*: [M+H]<sup>+</sup> Calcd for C<sub>33</sub>H<sub>34</sub>N<sub>3</sub>O<sub>2</sub> 504.2646; Found 504.2637.

### 8. Gram-scale synthesis of **3a**

To a reaction tube equipped with a stir bar were charged with **1a** (1.6208 g, 10 mmol), DCE (20 mL), [RhCp\*Cl<sub>2</sub>]<sub>2</sub> (77.3 mg, 0.125 mmol), NaOAc (205 mg, 2.5 mmol) and **2a** (940.4 mg, 5 mmol). The tube was then sealed, and the mixture was stirred at room temperature under argon for 12 h. Upon completion, it was quenched with saturated brine and extracted with dichloromethane (30 mL × 3). The combined organic phases were dried over anhydrous Na<sub>2</sub>SO<sub>4</sub>, filtered through a pad of celite, and concentrated under reduced pressure. The residue was purified by silica gel column chromatography with petroleum ether/ethyl acetate (2:1) as eluent to afford **3a** (1.059 g, 73%).

### 9. Gram-scale synthesis of **4a**

To a reaction tube equipped with a stir bar were charged with **1a** (648.3 mg, 4 mmol), DCE (20 mL), [RhCp\*Cl<sub>2</sub>]<sub>2</sub> (61.8 mg, 0.1 mmol), NaOAc (164 mg, 2 mmol) and **2a** (2.2570 g, 12 mmol). The tube was then

sealed, and the mixture was stirred at 50 °C under argon for 24 h. Upon completion, it was quenched with saturated brine and extracted with dichloromethane (30 mL × 3). The combined organic phases were dried over anhydrous Na<sub>2</sub>SO<sub>4</sub>, filtered through a pad of celite, and concentrated under reduced pressure. The residue was purified by silica gel column chromatography with petroleum ether/ethyl acetate (3:1) as eluent to afford **4a** (932.2 mg, 55%).

### III. Mechanistic studies

#### 1. H/D exchange experiment (I)

To a reaction tube equipped with a stir bar were charged with **1a** (32.4 mg, 0.2 mmol), DCE (2 mL), CD<sub>3</sub>OD (163 μL, 4 mmol), [RhCp\*Cl<sub>2</sub>]<sub>2</sub> (3.1 mg, 0.005 mmol) and NaOAc (8.2 mg, 0.1 mmol). The tube was then sealed, and the mixture was stirred at room temperature under argon for 0.5 h. Afterwards, it was quenched with saturated brine and extracted with dichloromethane (10 mL × 3). The combined organic phases were dried over anhydrous Na<sub>2</sub>SO<sub>4</sub>, filtered and concentrated under reduced pressure. The residue was purified by silica gel column chromatography using petroleum ether/ethyl acetate (2:1) as eluent to give a mixture of **1a** and **1a-d<sub>2</sub>**. Upon analyzing the <sup>1</sup>H NMR spectrum of the mixture, the deuteration ratio was determined to be 15%.

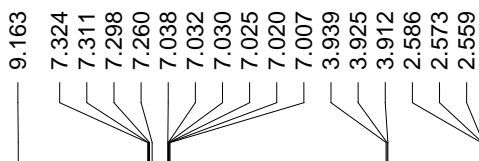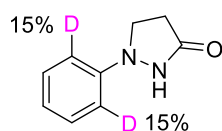

**1a/1a-d<sub>2</sub>**

<sup>1</sup>H NMR (600 MHz, CDCl<sub>3</sub>)

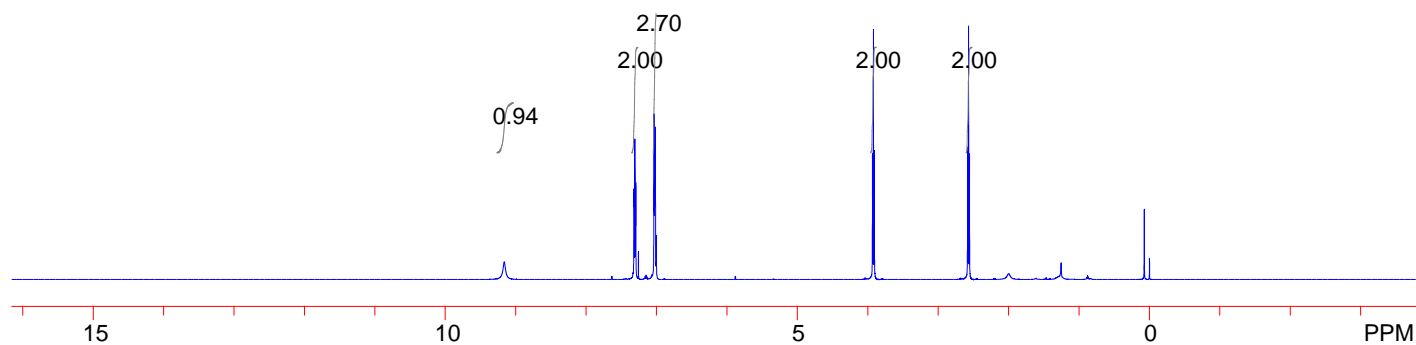

#### 2. H/D exchange experiment (II)

To a reaction tube equipped with a stir bar were charged with **1a** (64.8 mg, 0.4 mmol), **2a** (37.7 mg, 0.2 mmol), DCE (2 mL), CD<sub>3</sub>OD (163 μL, 4 mmol), [RhCp\*Cl<sub>2</sub>]<sub>2</sub> (3.1 mg, 0.005 mmol) and NaOAc (8.2 mg, 0.1 mmol). The tube was then sealed, and the mixture was stirred at room temperature under argon for 0.5 h. Afterwards, it was quenched with saturated brine and extracted with dichloromethane (10 mL × 3). The combined organic phases were dried over anhydrous Na<sub>2</sub>SO<sub>4</sub>, filtered and concentrated under reduced pressure. The residue was purified by silica gel column chromatography using petroleum ether/ethyl acetate (2:1) as eluent to give a mixture of **3a** and **3a-d<sub>1</sub>**. Upon analyzing the <sup>1</sup>H NMR spectrum of the mixture, the deuteration ratio was determined to be about 9%.

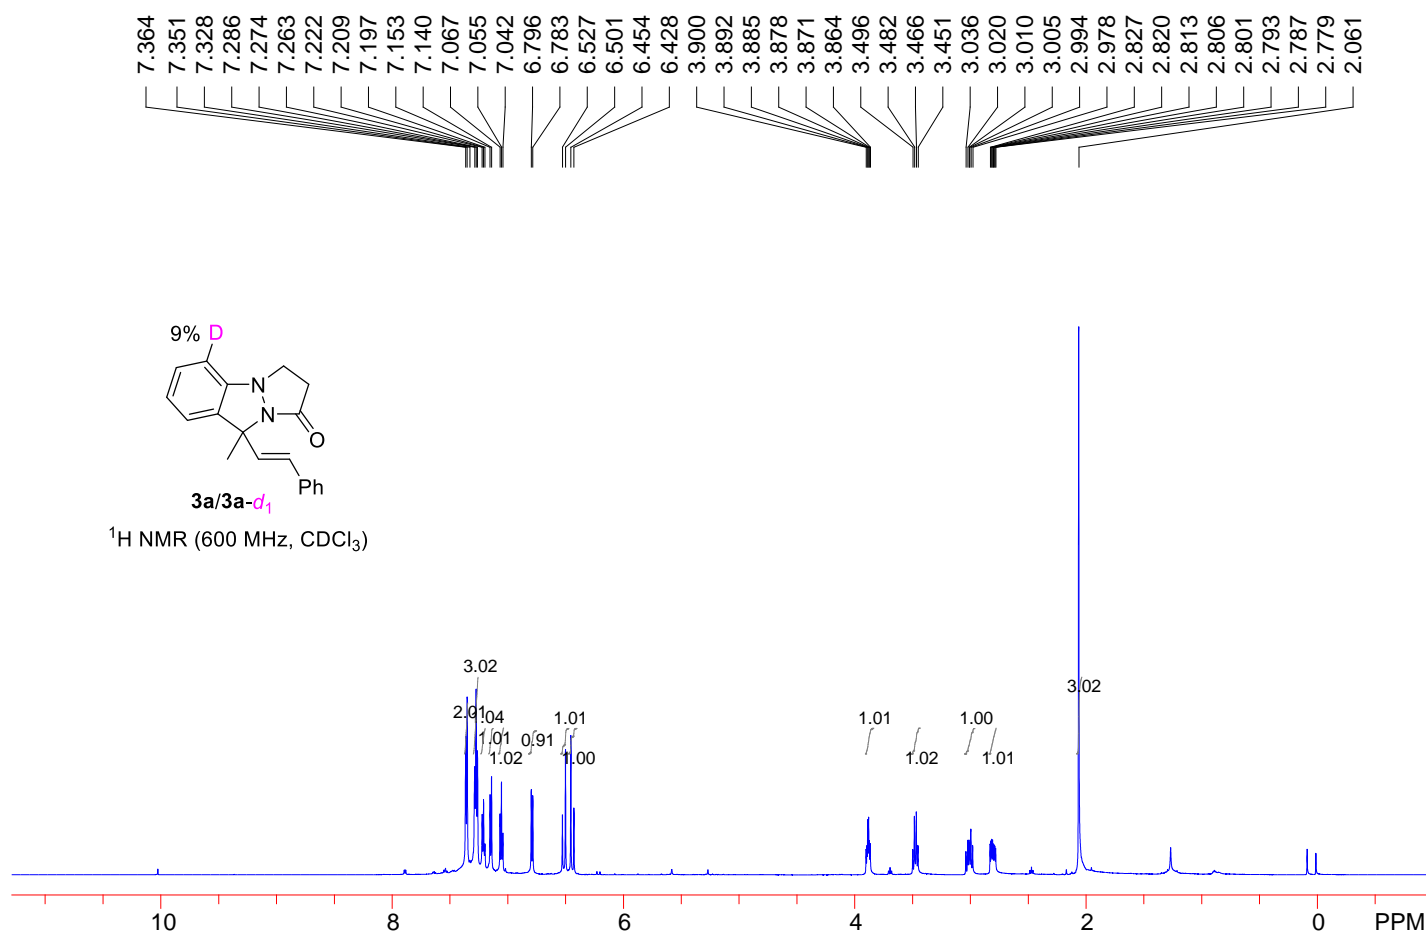

### 3. Kinetic isotope effect study

To a reaction tube equipped with a stir bar were charged with **1a** (16.7 mg, 0.1 mmol), **1a-d<sub>5</sub>** (16.2 mg, 0.1 mmol), **2a** (18.8 mg, 0.1 mmol), DCE (1 mL), [RhCp\*Cl<sub>2</sub>]<sub>2</sub> (1.6 mg, 0.0025 mmol) and NaOAc (4.1 mg, 0.05 mmol). The tube was then sealed, and the mixture was stirred at room temperature under argon for 0.5 h.



Afterwards, it was quenched with saturated brine and extracted with dichloromethane (10 mL  $\times$  3). The combined organic phases were dried over anhydrous Na<sub>2</sub>SO<sub>4</sub>, filtered and concentrated under reduced pressure. The residue was purified by silica gel column chromatography using petroleum ether/ethyl acetate (2:1) as eluent to give a mixture of **3a** and **3a-d<sub>4</sub>**. Upon analyzing the <sup>1</sup>H NMR spectrum of the mixture, the ratio of **3a** to **3a-d<sub>4</sub>** was determined to be about 0.75:0.25. Accordingly, the intermolecular KIE (k<sub>H</sub>/k<sub>D</sub>) was calculated to be about 3.0.

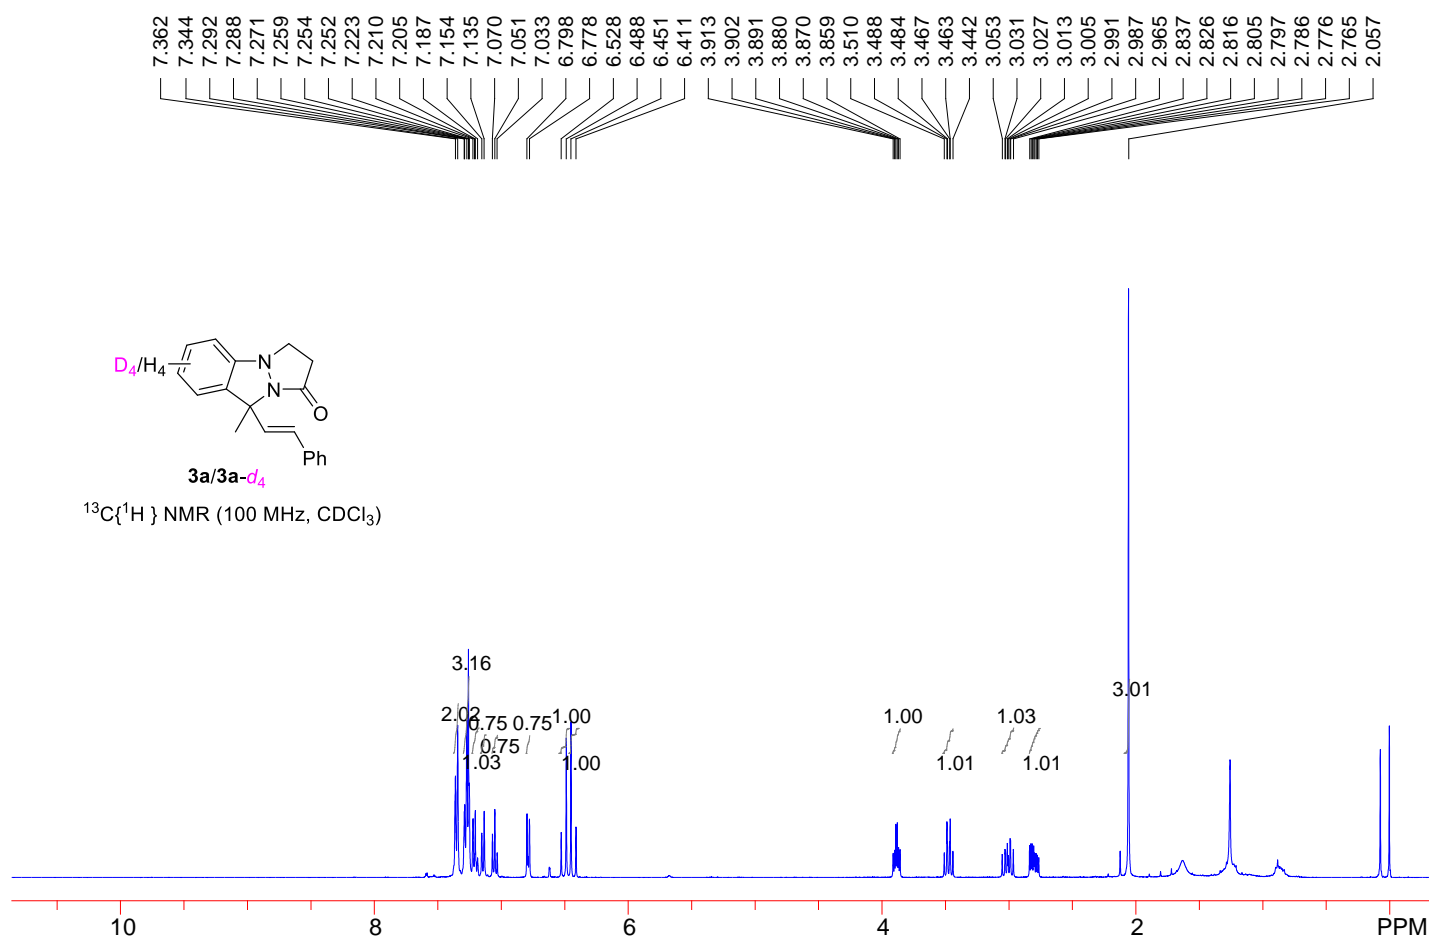

#### 4. Electronic competition experiment

To a reaction tube equipped with a stir bar were added **1b** (35.2 mg, 0.2 mmol), **1e** (46.0 mg, 0.2 mmol), **2a** (37.7 mg, 0.2 mmol), [RhCp\*Cl<sub>2</sub>]<sub>2</sub> (3.1 mg, 0.005 mmol), NaOAc (8.2 mg, 0.1 mmol) and DCE (2 mL). The tube was then sealed, and the mixture was stirred at room temperature for 0.5 h. Afterwards, it was quenched with saturated brine and extracted with dichloromethane (10 mL  $\times$  3). The combined organic phases were dried over anhydrous Na<sub>2</sub>SO<sub>4</sub>, filtered and concentrated under reduced pressure. The residue was purified by

silica gel column chromatography using petroleum ether/ethyl acetate (2:1) as eluent to give **3e** (36.5 mg, 51%). Meanwhile, product **3b** was formed in trace amount.

## 5. Controle experiment

To a reaction tube equipped with a stir bar were added **3a** (29.0 mg, 0.1 mmol), **2a** (41.8 mg, 0.1 mmol),  $[\text{RhCp}^*\text{Cl}_2]_2$  (1.6 mg, 0.0025 mmol), NaOAc (4.1 mg, 0.05 mmol) and DCE (1 mL). The tube was then sealed, and the mixture was stirred at 50 °C under argon for 6 h. From the resulting mixture, the generation of **4a** was not observed based on TLC detection.

#### IV. References

- [1] N. Li, X. Zhang and X. Fan, Synthesis of pyrazolidinone fused cinnolines via the cascade reactions of 1-phenylpyrazolidinones with vinylene carbonate, *Tetrahedron Lett.*, 2022, **103**, 153984.
- [2] A. Singh, R. K. Shukla and C. M. R. Volla, Rh(III)-Catalyzed [5+1] annulation of 2-alkenylanilides and 2-alkenylphenols with allenyl acetates, *Chem. Sci.*, 2022, **13**, 2043–2049.
- [3] K.-I. Fujita, Y. Takahashi, M. Owaki, K. Yamamoto and R. Yamaguchi, Synthesis of five-, six-, and seven-membered ring lactams by Cp\*Rh complex-catalyzed oxidative *N*-heterocyclization of amino alcohols, *Org. Lett.*, 2004, **6**, 2785–2788.

## V. NMR spectra of 3a-3ee

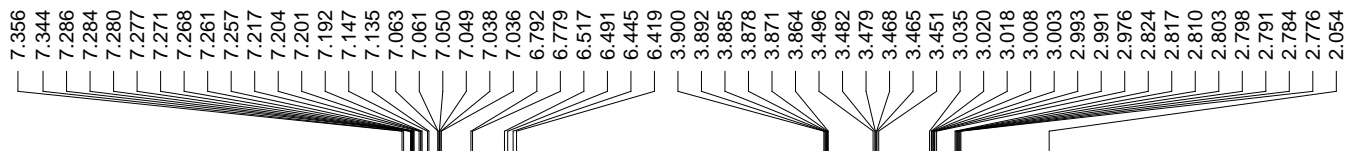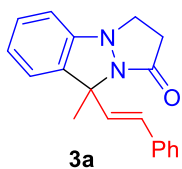

<sup>1</sup>H NMR (600 MHz, CDCl<sub>3</sub>)

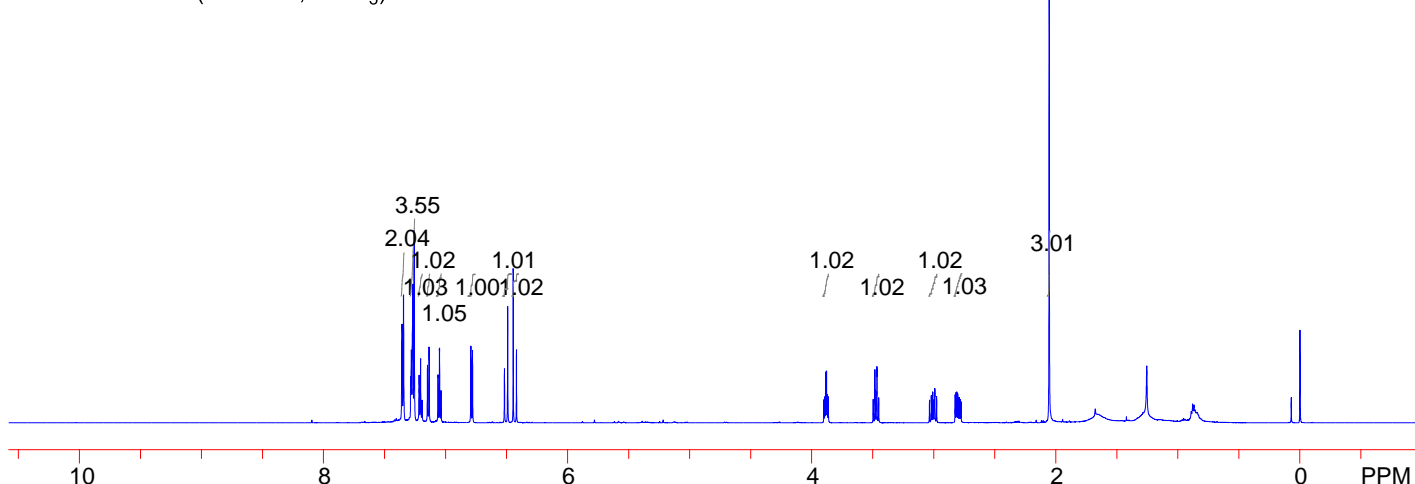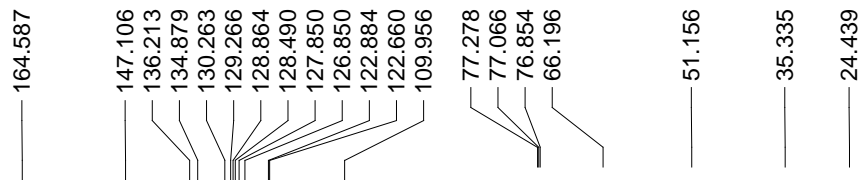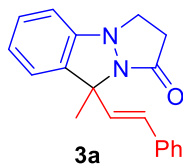

<sup>13</sup>C{<sup>1</sup>H} NMR (150 MHz, CDCl<sub>3</sub>)

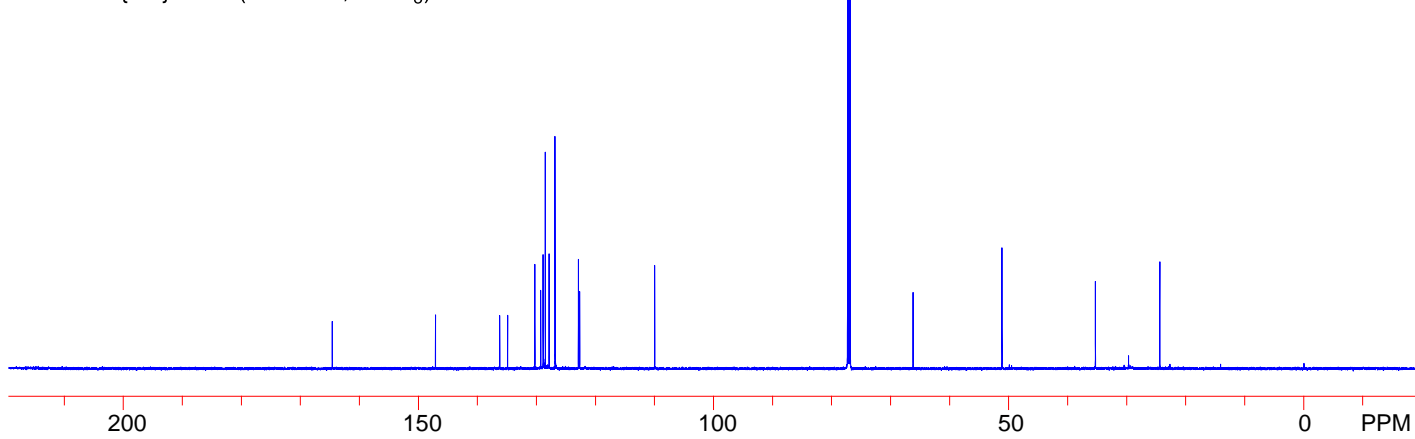

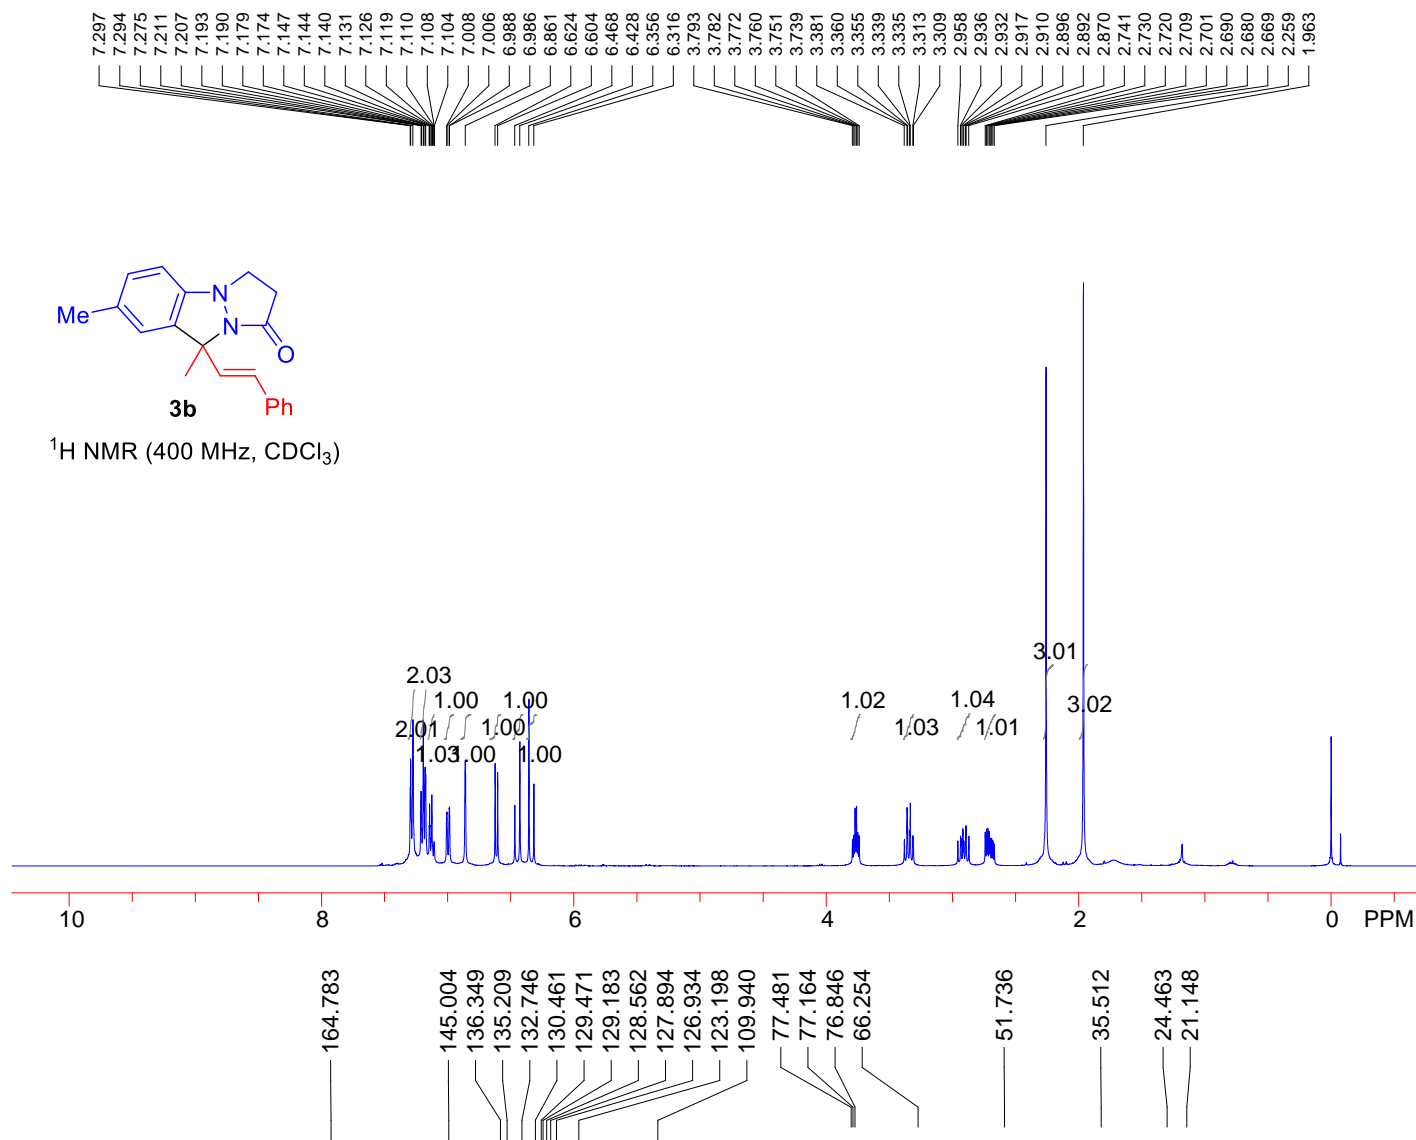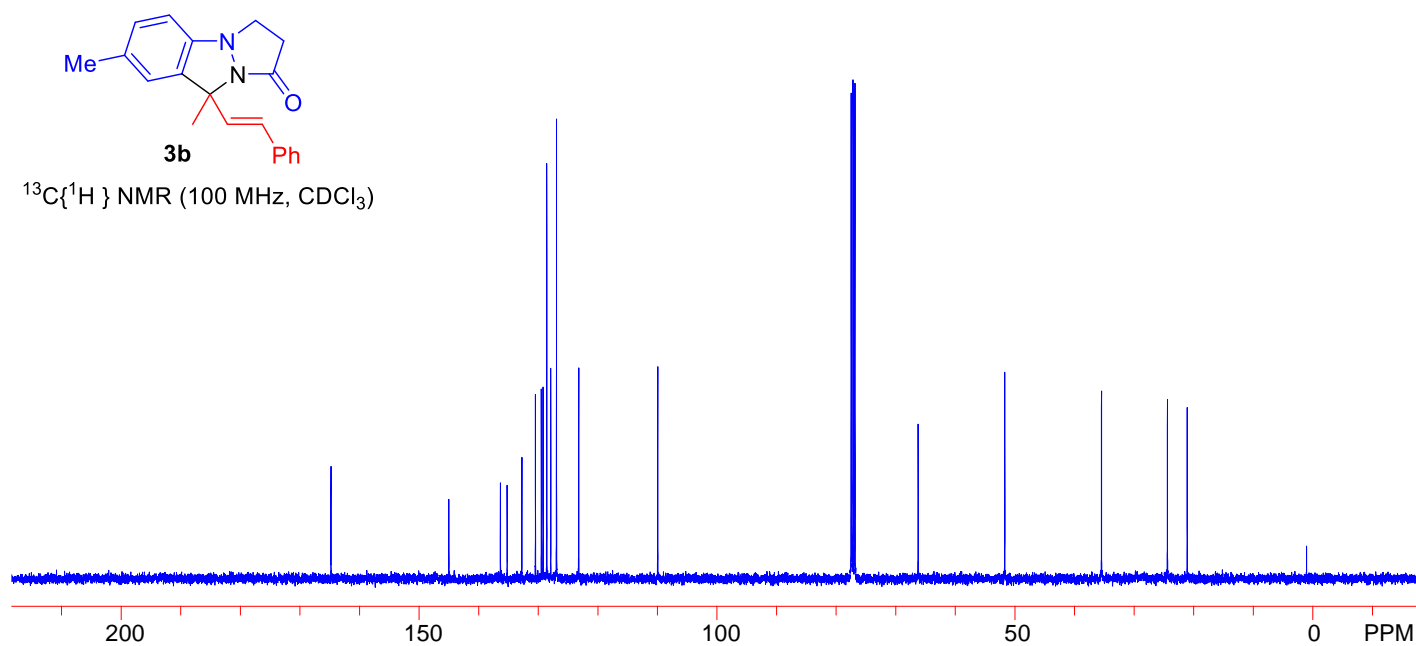

7.366  
7.354  
7.292  
7.280  
7.267  
7.257  
7.236  
7.233  
7.222  
7.219  
7.207  
7.098  
7.095  
6.705  
6.691  
6.531  
6.505  
6.397  
6.371  
3.862  
3.855  
3.848  
3.840  
3.834  
3.826  
3.474  
3.460  
3.443  
3.429  
3.018  
3.004  
3.002  
2.992  
2.987  
2.977  
2.975  
2.960  
2.823  
2.816  
2.809  
2.802  
2.797  
2.789  
2.783  
2.775  
2.033

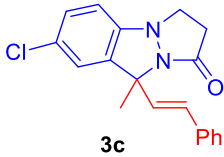

<sup>1</sup>H NMR (600 MHz, CDCl<sub>3</sub>)

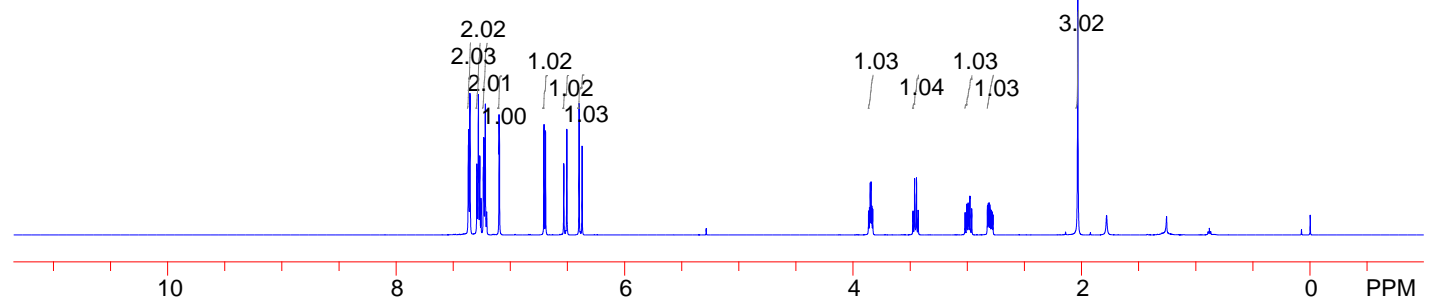

164.654  
145.785  
136.759  
136.008  
129.751  
129.655  
128.982  
128.621  
128.106  
128.032  
126.949  
122.989  
110.990  
77.371  
77.160  
76.950  
66.255  
51.131  
35.323  
24.367

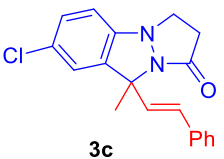

<sup>13</sup>C{<sup>1</sup>H} NMR (150 MHz, CDCl<sub>3</sub>)

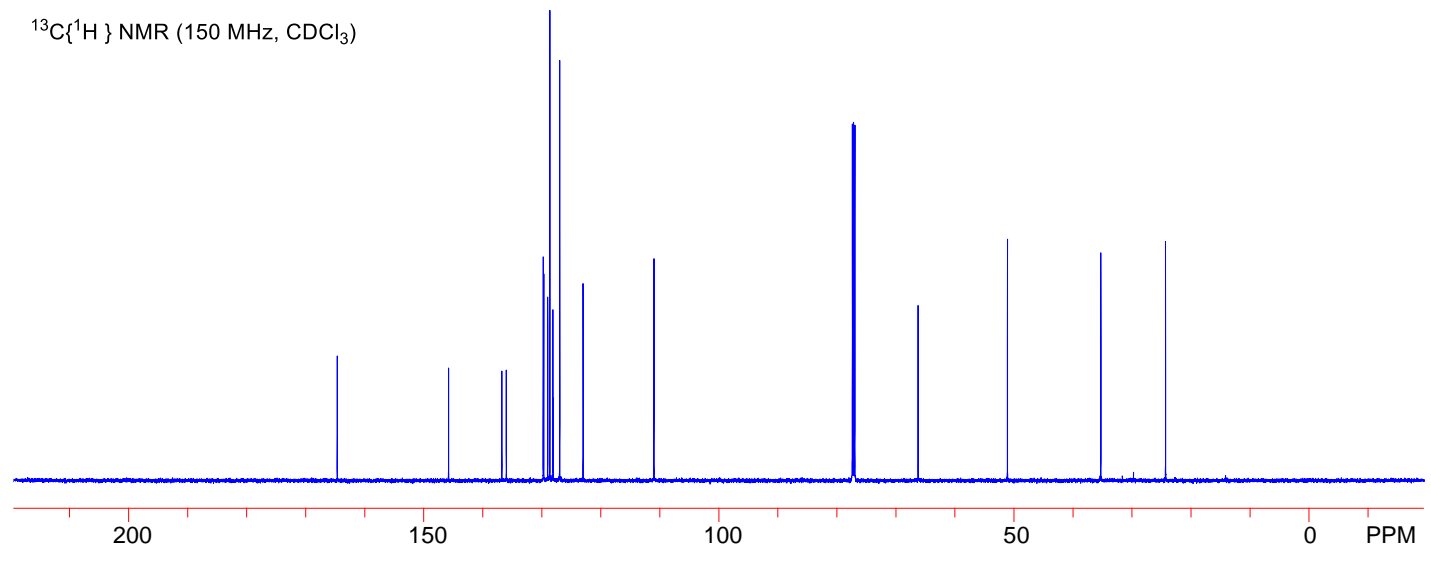

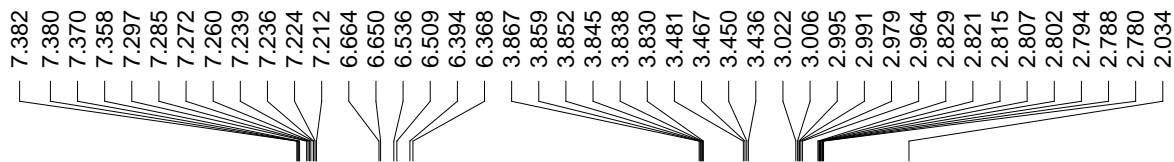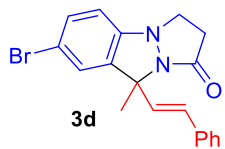

$^1\text{H}$  NMR (600 MHz,  $\text{CDCl}_3$ )

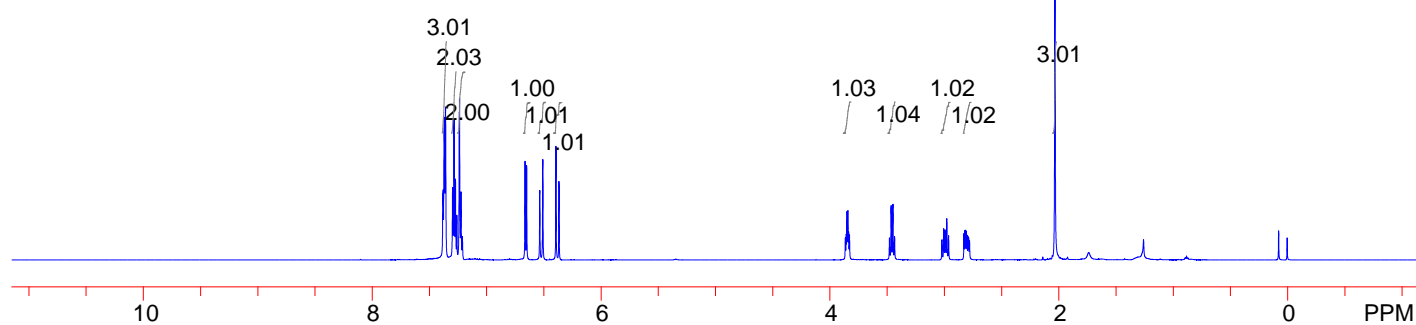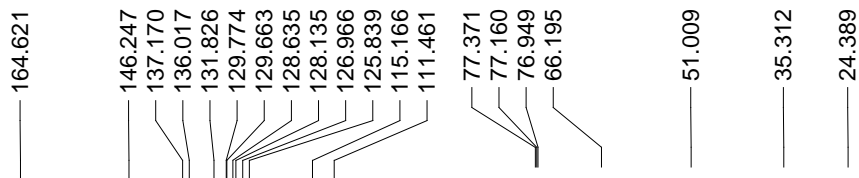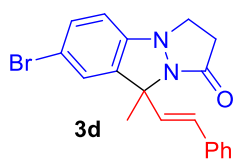

$^{13}\text{C}\{^1\text{H}\}$  NMR (150 MHz,  $\text{CDCl}_3$ )

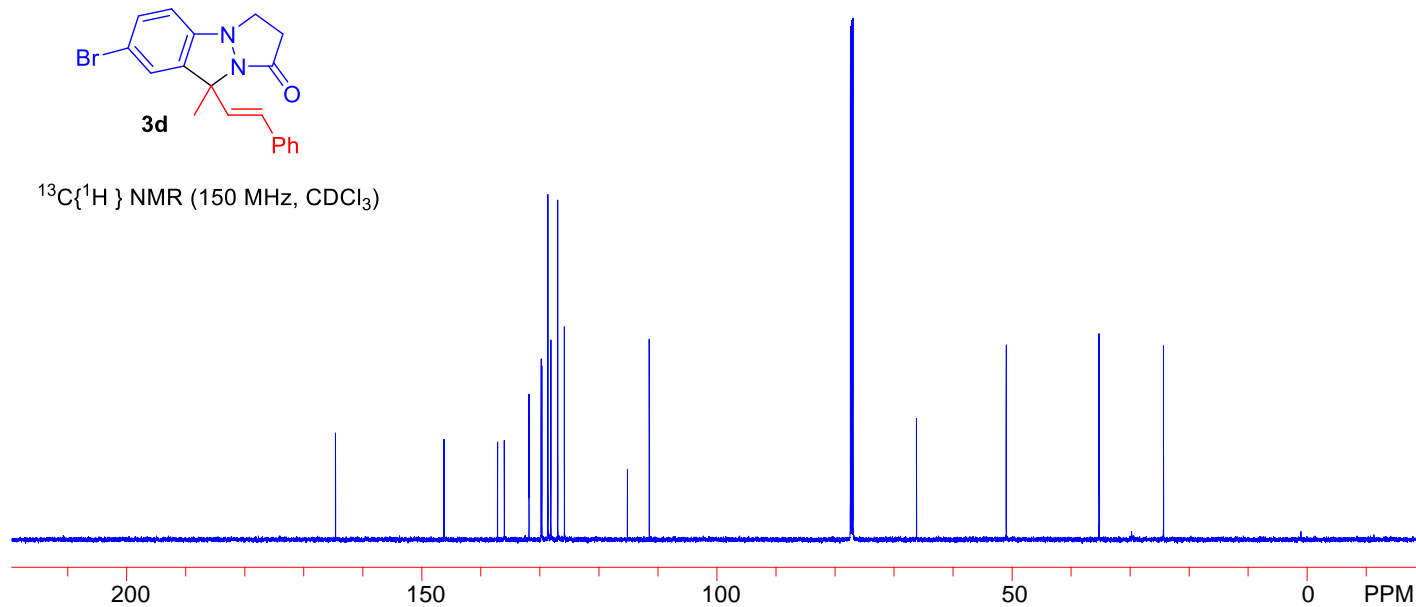

7.544  
7.530  
7.371  
7.358  
7.299  
7.286  
7.273  
7.256  
7.239  
7.227  
7.215  
6.823  
6.809  
6.541  
6.515  
6.413  
6.387  
3.937  
3.929  
3.922  
3.914  
3.907  
3.900  
3.571  
3.556  
3.540  
3.526  
3.053  
3.037  
3.026  
3.021  
3.010  
2.994  
2.864  
2.856  
2.850  
2.842  
2.838  
2.830  
2.823  
2.815  
2.070

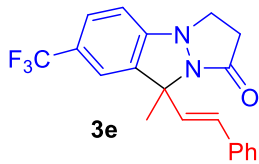

$^1\text{H NMR}$  (600 MHz,  $\text{CDCl}_3$ )

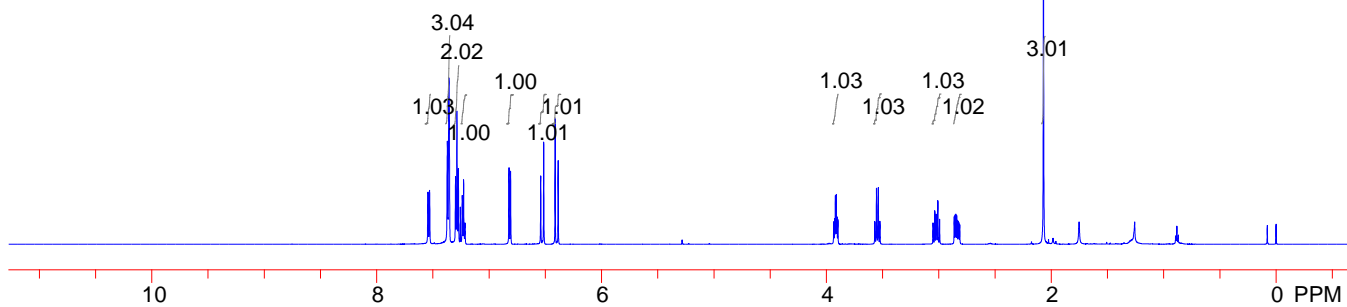

135.926  
135.638  
129.949  
164.540  
129.449  
128.669  
128.603  
127.046  
126.990  
126.793  
126.770  
126.743  
126.723  
125.386  
125.249  
125.171  
124.957  
124.740  
123.450  
121.648  
119.972  
119.950  
119.924  
119.895  
109.558  
77.371  
77.160  
76.949  
66.264  
50.175  
35.154  
24.399

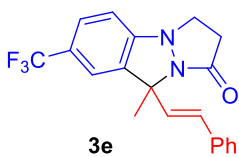

$^{13}\text{C}\{^1\text{H}\}$  NMR (150 MHz,  $\text{CDCl}_3$ )

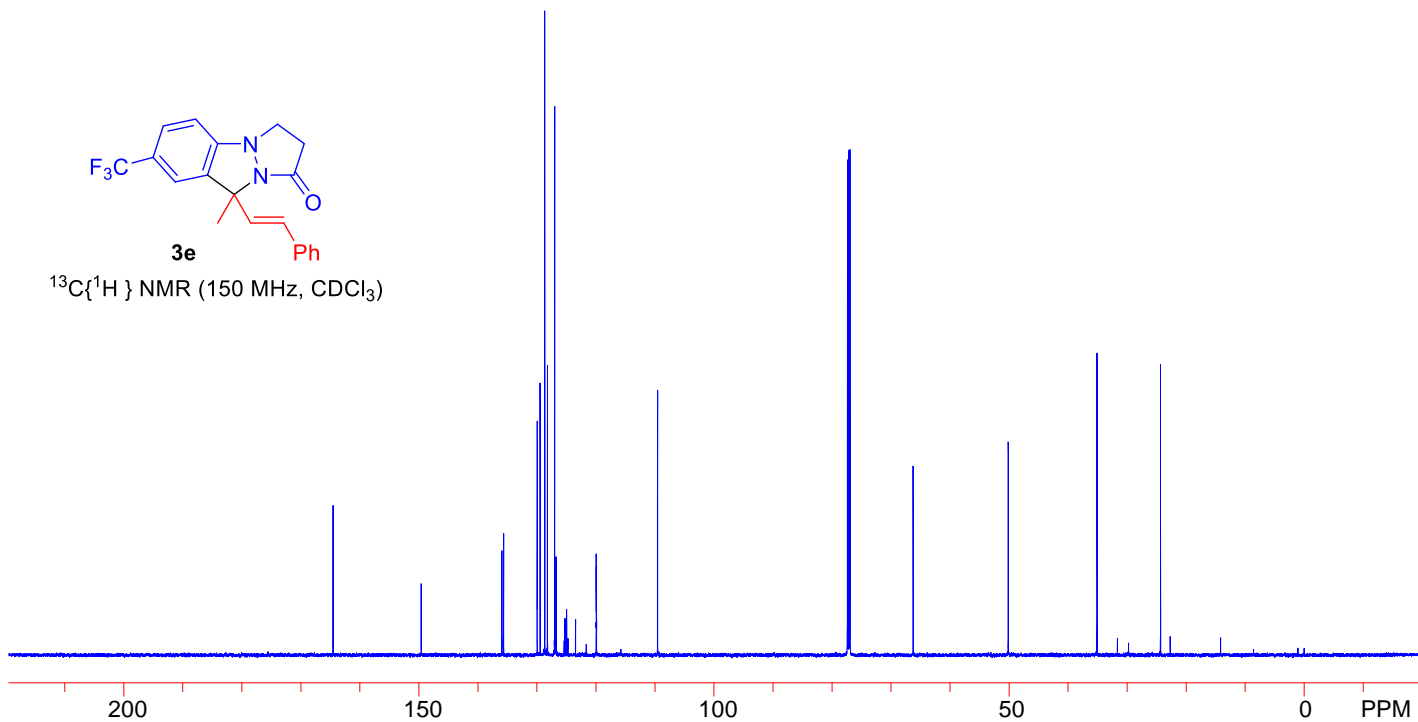



-61.299

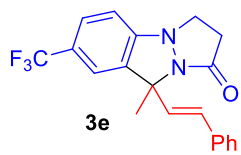

<sup>19</sup>F NMR (565 MHz, CDCl<sub>3</sub>)

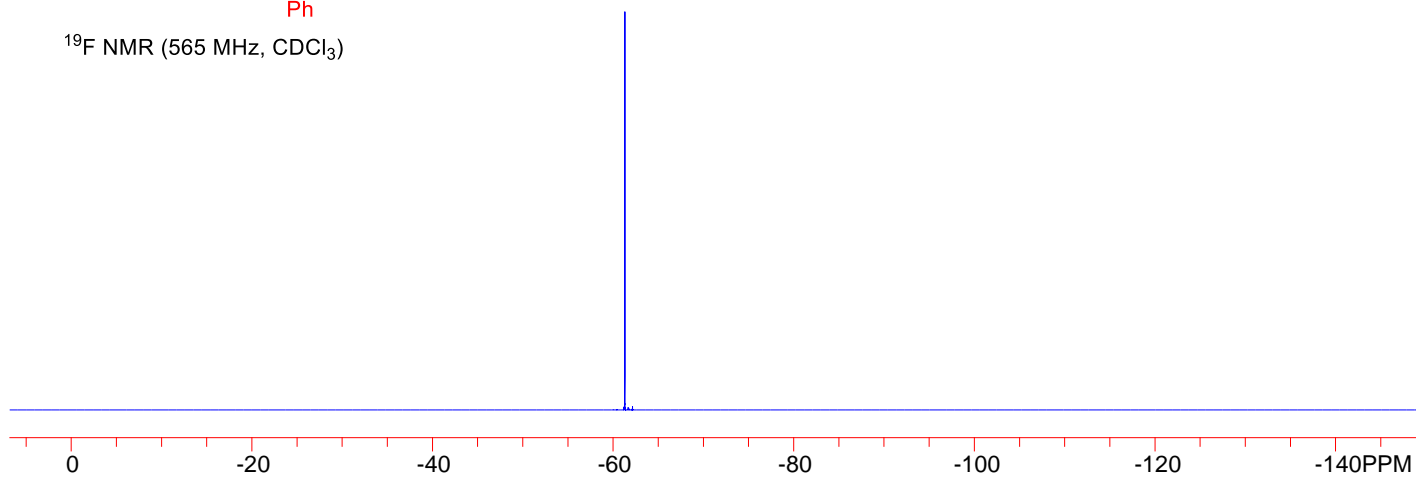

7.360  
7.348  
7.281  
7.269  
7.258  
7.256  
7.215  
7.203  
7.191  
7.030  
7.016  
6.873  
6.861  
6.608  
6.517  
6.490  
6.453  
6.426  
3.874  
3.866  
3.860  
3.852  
3.845  
3.838  
3.470  
3.456  
3.454  
3.439  
3.425  
3.023  
3.008  
3.006  
2.997  
2.992  
2.982  
2.980  
2.965  
2.812  
2.805  
2.799  
2.791  
2.786  
2.778  
2.772  
2.764  
2.370  
2.041

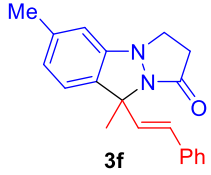

$^1\text{H NMR}$  (600 MHz,  $\text{CDCl}_3$ )

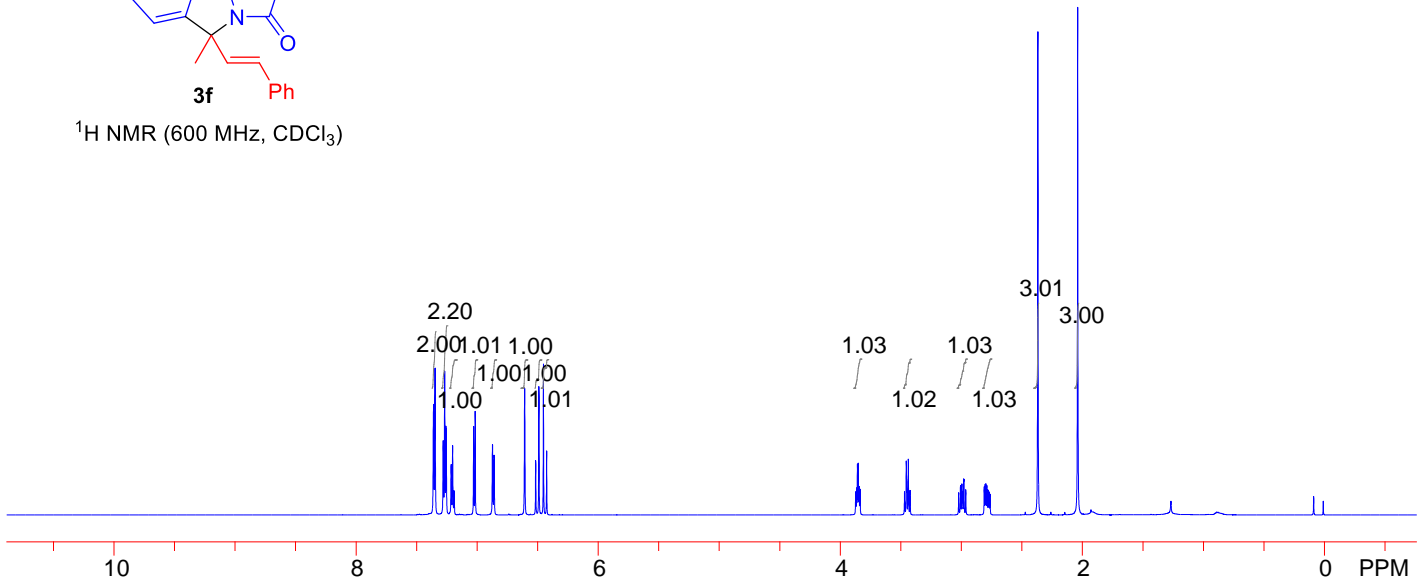

164.574  
147.338  
139.163  
136.324  
132.161  
130.486  
129.139  
128.513  
127.831  
126.877  
123.720  
122.406  
110.650  
77.477  
77.160  
76.843  
66.111  
51.203  
35.414  
24.579  
21.626

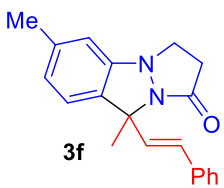

$^{13}\text{C}\{^1\text{H}\}$  NMR (100 MHz,  $\text{CDCl}_3$ )

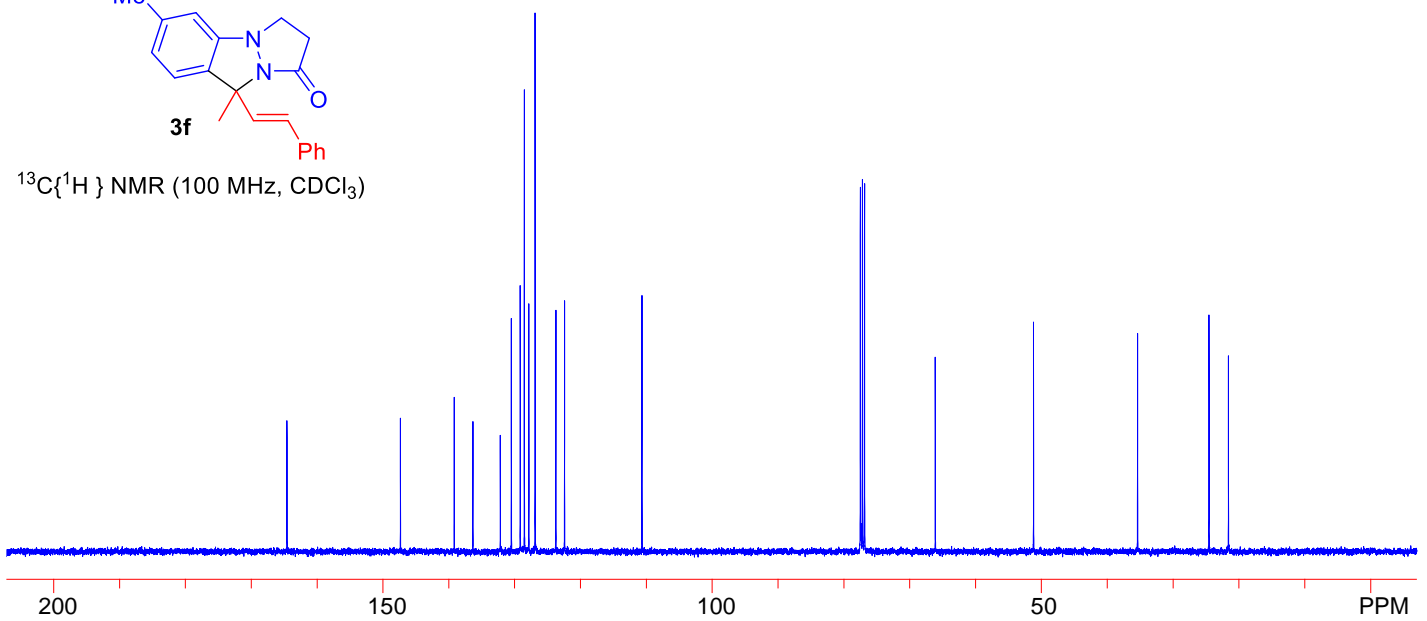

7.352  
7.340  
7.287  
7.274  
7.261  
7.256  
7.226  
7.214  
7.202  
7.042  
7.028  
7.011  
7.009  
6.998  
6.995  
6.758  
6.755  
6.493  
6.467  
6.414  
6.387  
3.867  
3.859  
3.852  
3.845  
3.838  
3.830  
3.502  
3.488  
3.471  
3.457  
3.014  
2.999  
2.988  
2.983  
2.972  
2.956  
2.826  
2.819  
2.812  
2.804  
2.800  
2.792  
2.786  
2.778  
2.023

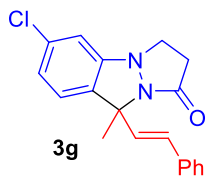

$^1\text{H NMR}$  (600 MHz,  $\text{CDCl}_3$ )

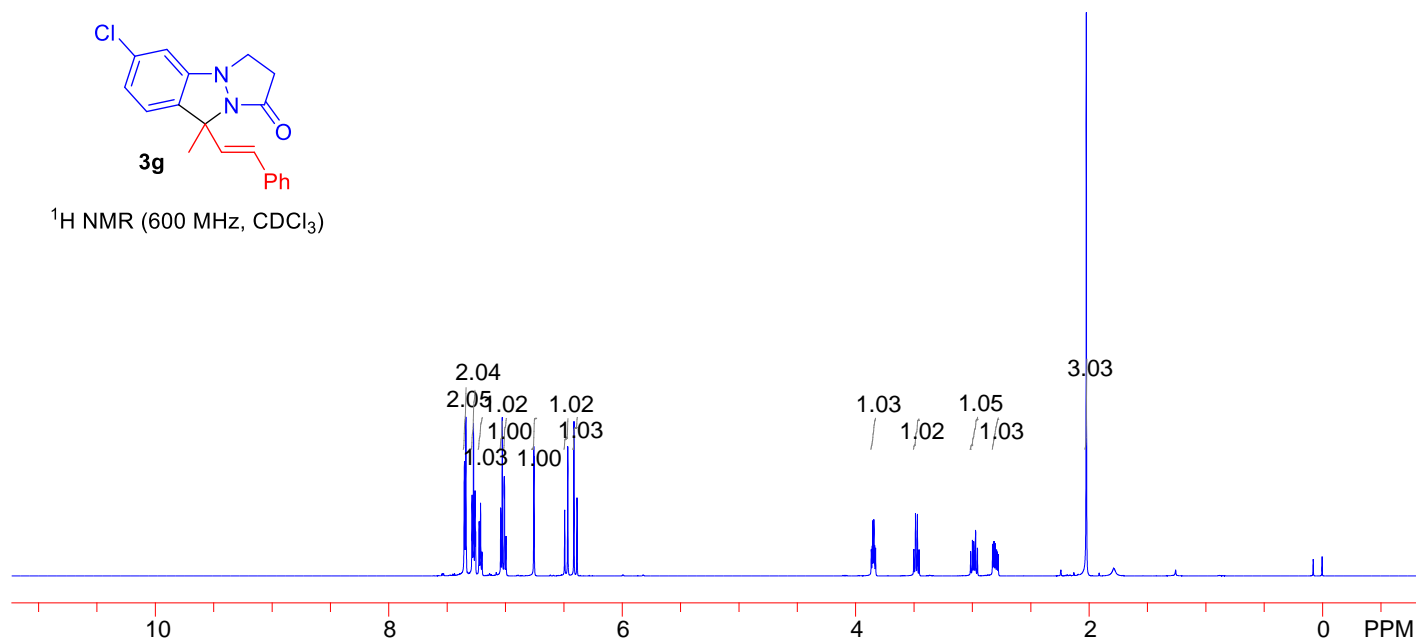

164.450  
148.195  
135.994  
134.686  
133.438  
129.754  
129.622  
128.555  
128.013  
126.858  
123.600  
122.822  
110.321  
77.408  
77.090  
76.772  
66.045  
50.641  
35.156  
24.397

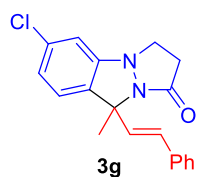

$^{13}\text{C}\{^1\text{H}\}$  NMR (100 MHz,  $\text{CDCl}_3$ )

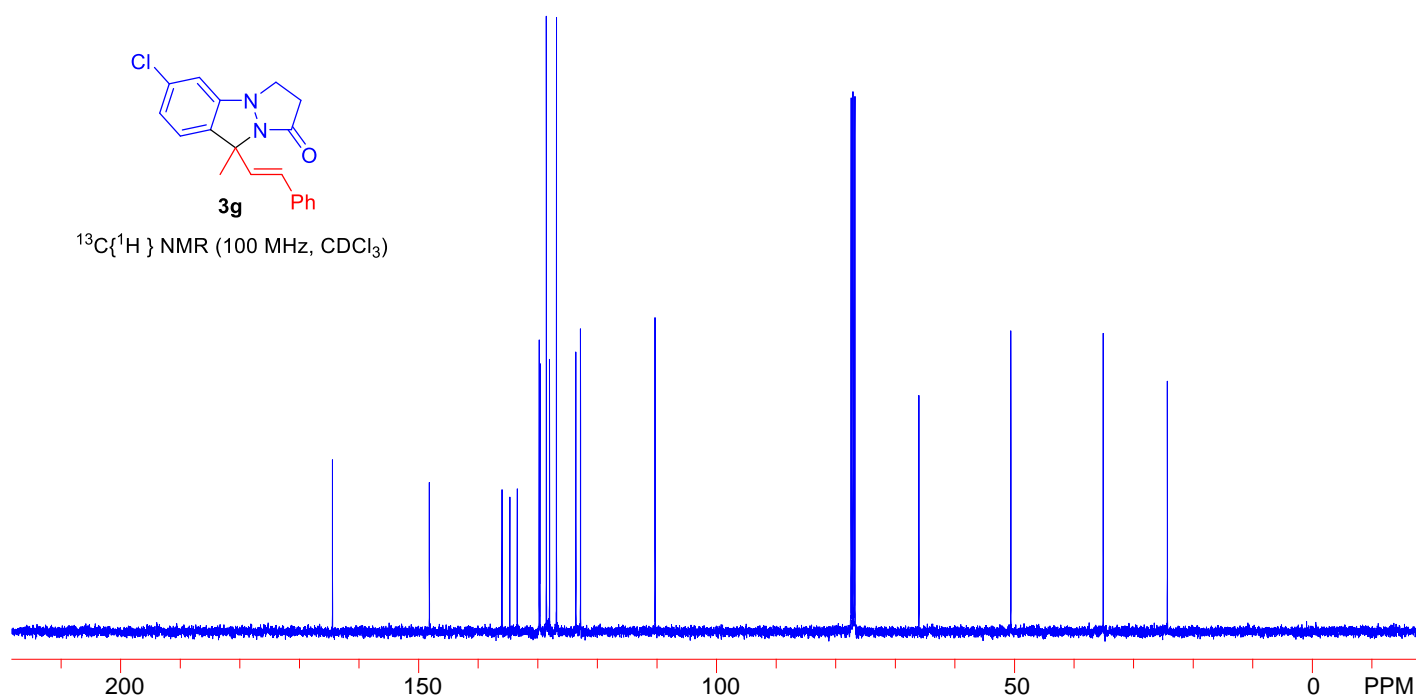

7.349  
7.336  
7.282  
7.270  
7.257  
7.221  
7.209  
7.197  
7.159  
7.156  
7.145  
7.143  
6.981  
6.968  
6.908  
6.906  
6.493  
6.467  
6.408  
6.382  
3.854  
3.846  
3.840  
3.832  
3.825  
3.817  
3.492  
3.477  
3.461  
3.447  
3.005  
2.990  
2.979  
2.974  
2.963  
2.947  
2.818  
2.811  
2.804  
2.796  
2.792  
2.784  
2.777  
2.770  
2.016

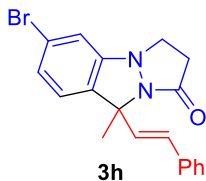

$^1\text{H NMR}$  (600 MHz,  $\text{CDCl}_3$ )

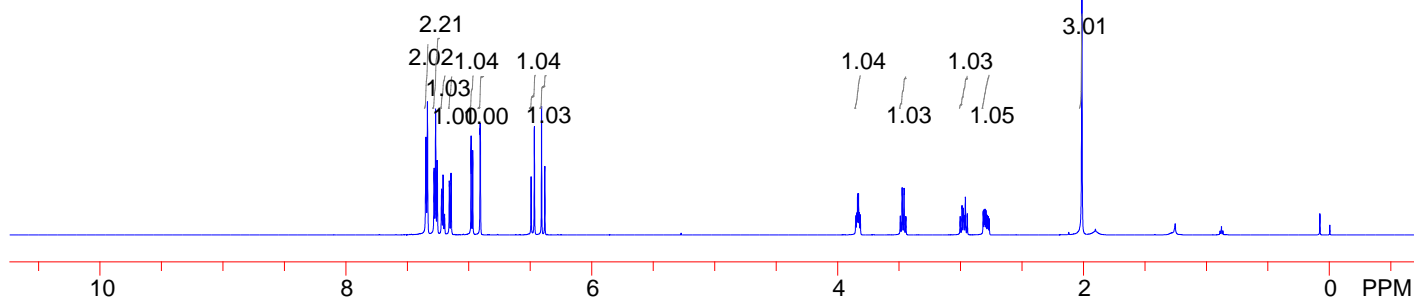

164.479  
148.417  
136.010  
134.026  
129.700  
129.666  
128.588  
128.055  
126.877  
125.719  
124.016  
122.468  
113.188  
77.371  
77.160  
76.949  
66.114  
50.653  
35.174  
24.370

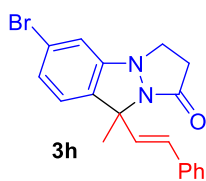

$^{13}\text{C}\{^1\text{H}\}$  NMR (150 MHz,  $\text{CDCl}_3$ )

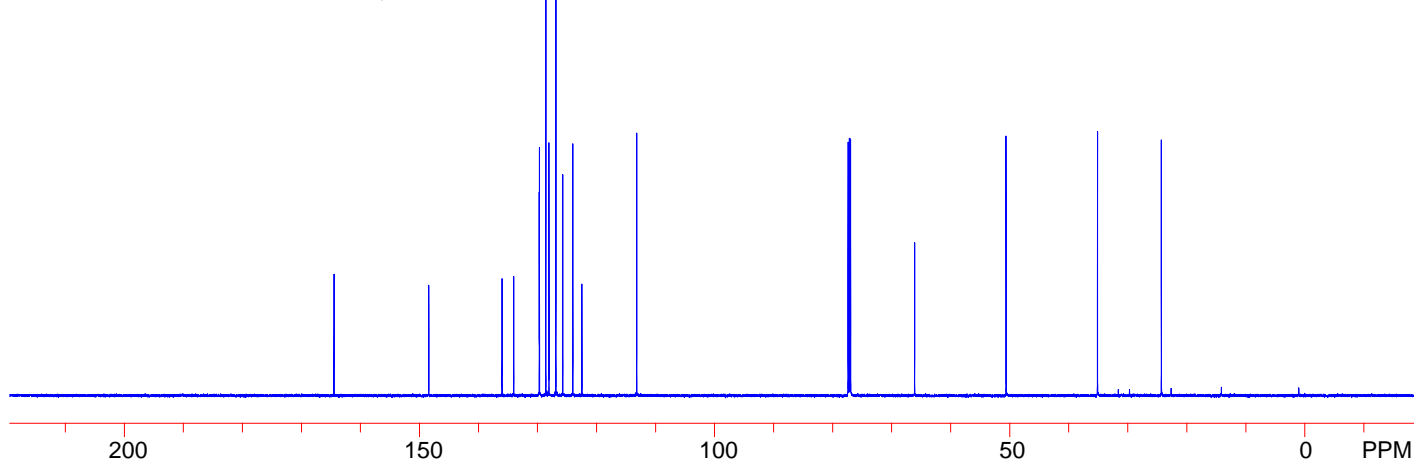

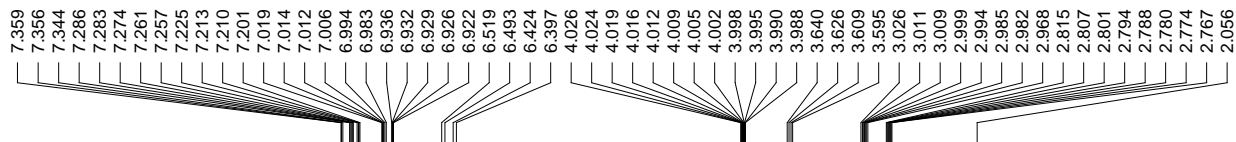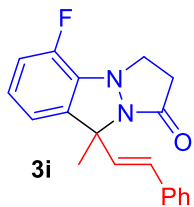

$^1\text{H}$  NMR (600 MHz,  $\text{CDCl}_3$ )

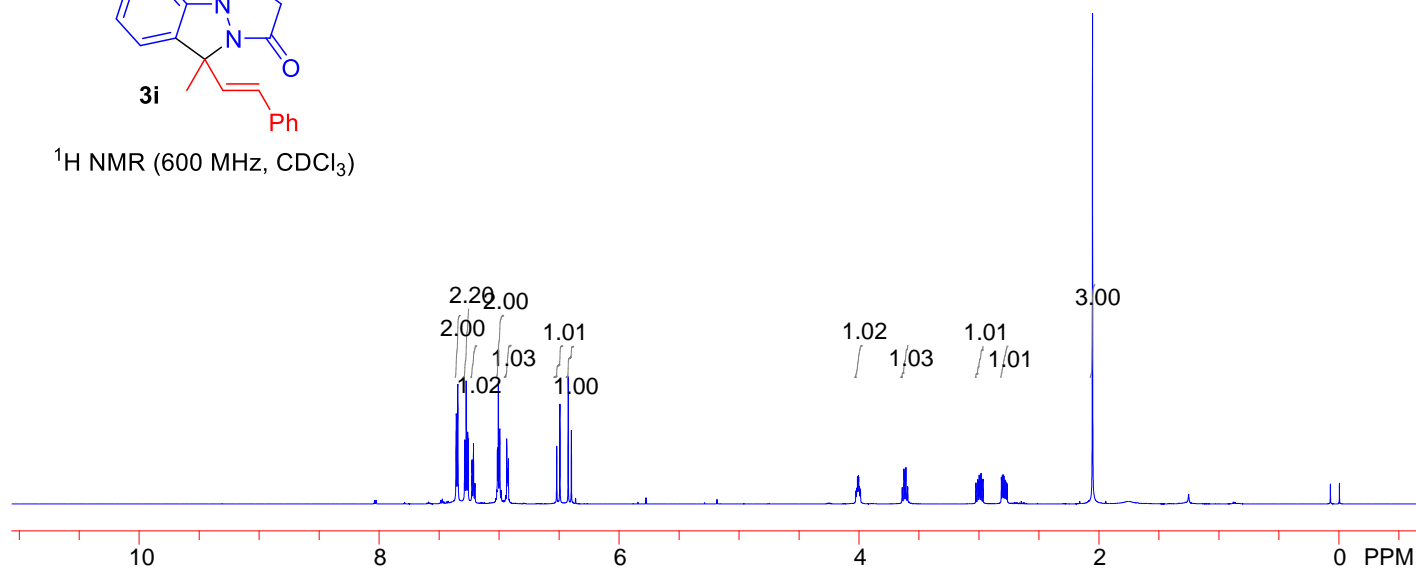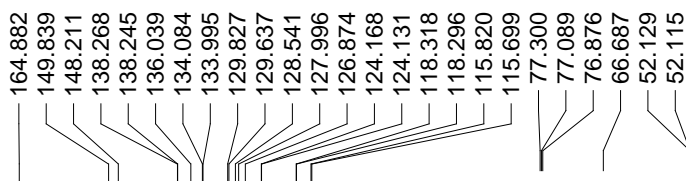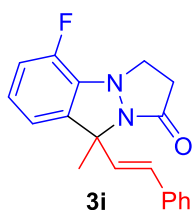

$^{13}\text{C}\{^1\text{H}\}$  NMR (150 MHz,  $\text{CDCl}_3$ )

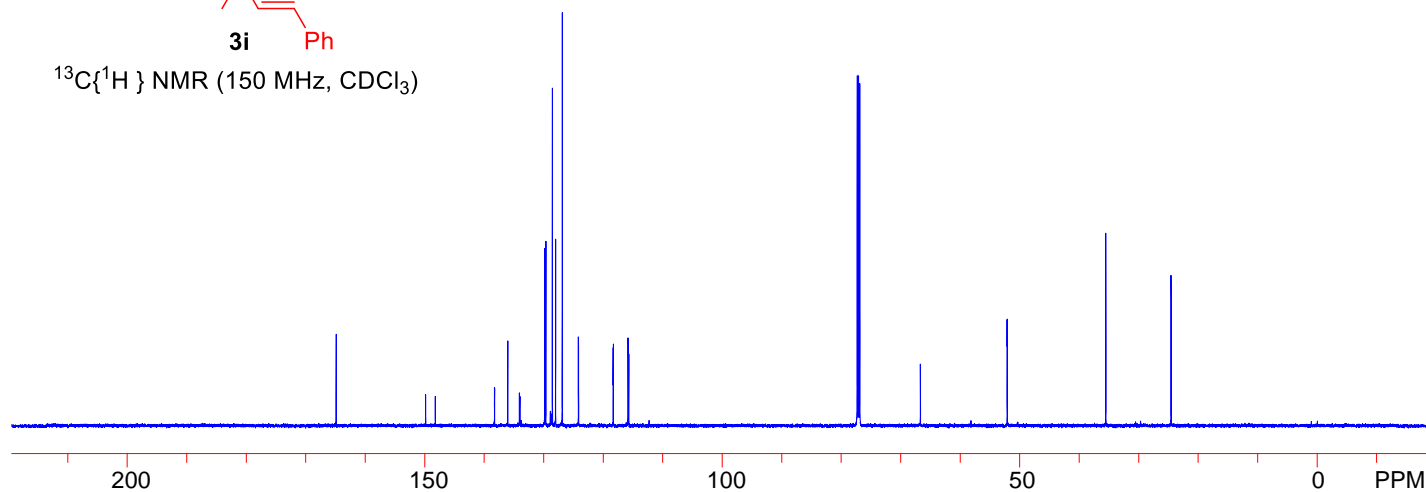

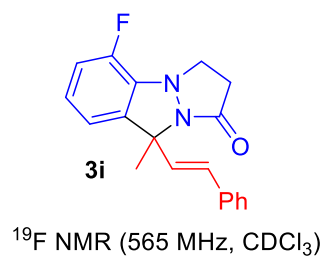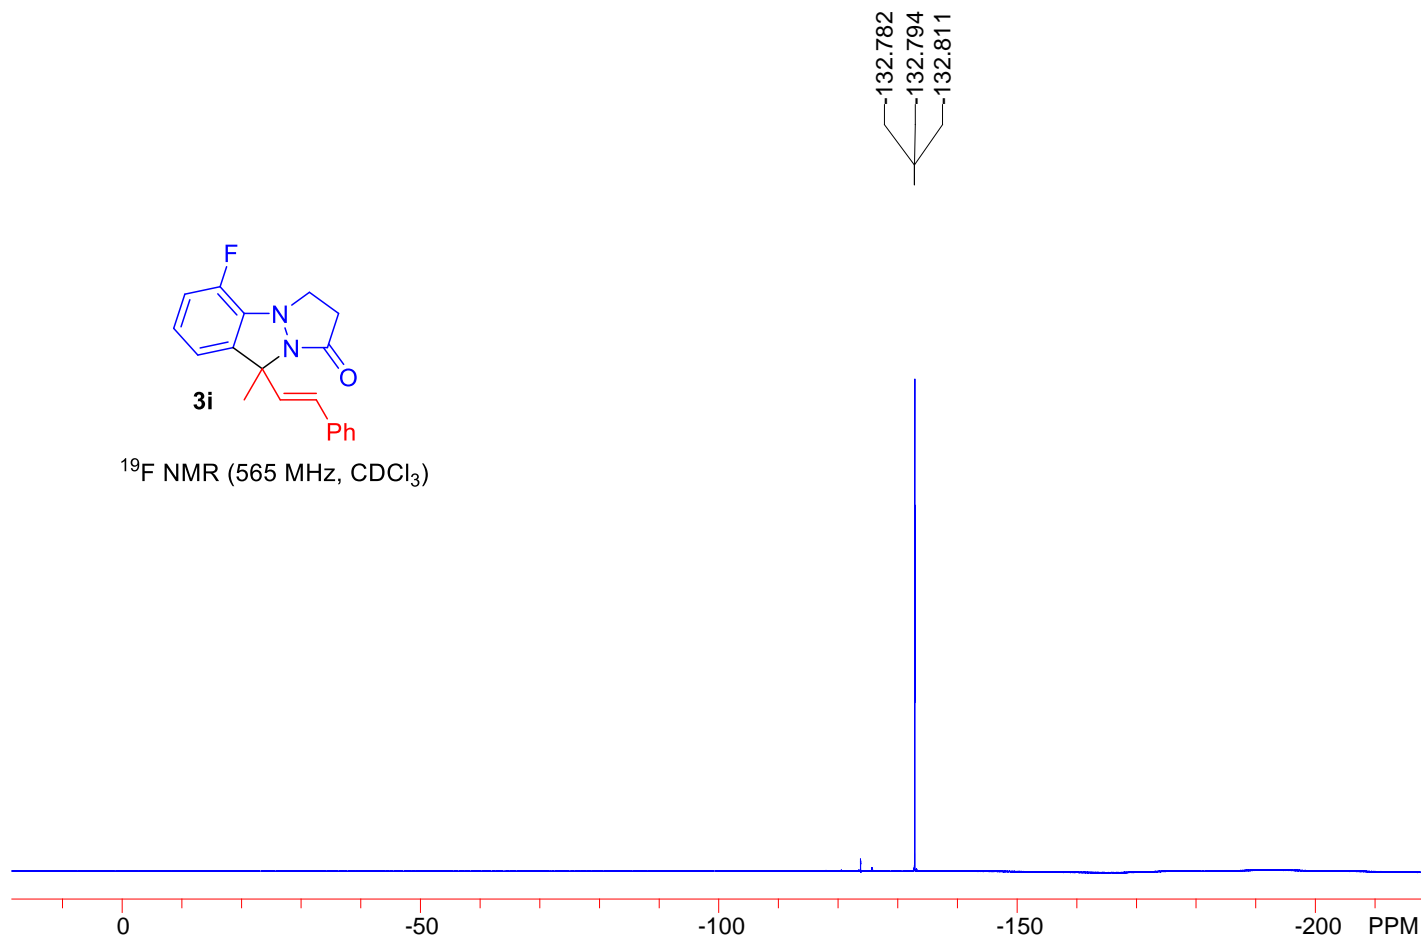

7.359  
7.341  
7.285  
7.267  
7.248  
7.218  
7.205  
7.200  
7.194  
7.182  
7.056  
7.037  
7.017  
6.826  
6.805  
6.780  
6.761  
6.541  
6.501  
6.446  
6.406  
4.047  
4.036  
4.026  
4.014  
4.004  
3.993  
3.874  
3.588  
3.567  
3.563  
3.542  
3.542  
3.520  
3.007  
2.986  
2.981  
2.967  
2.960  
2.946  
2.941  
2.920  
2.778  
2.766  
2.758  
2.746  
2.738  
2.727  
2.718  
2.707  
2.054

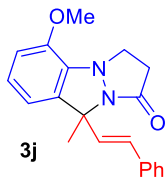

$^1\text{H NMR}$  (400 MHz,  $\text{CDCl}_3$ )

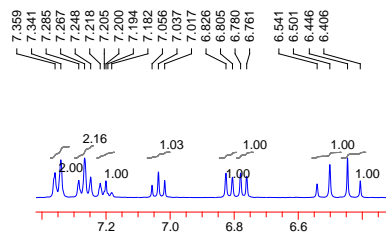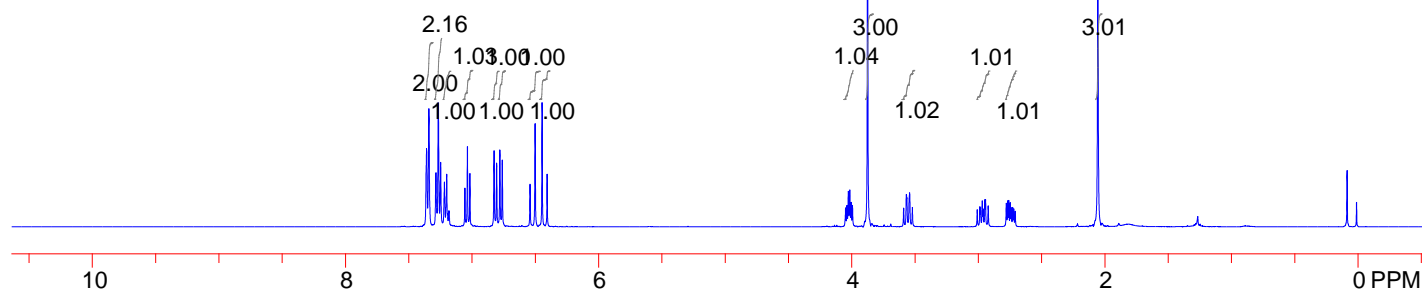

165.245  
146.354  
136.321  
136.259  
135.164  
130.405  
129.222  
128.457  
127.762  
126.842  
124.263  
114.794  
110.847  
77.402  
77.084  
76.766  
66.520  
55.703  
53.005  
35.727  
24.743

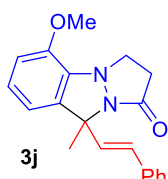

$^{13}\text{C}\{^1\text{H}\}$  NMR (100 MHz,  $\text{CDCl}_3$ )

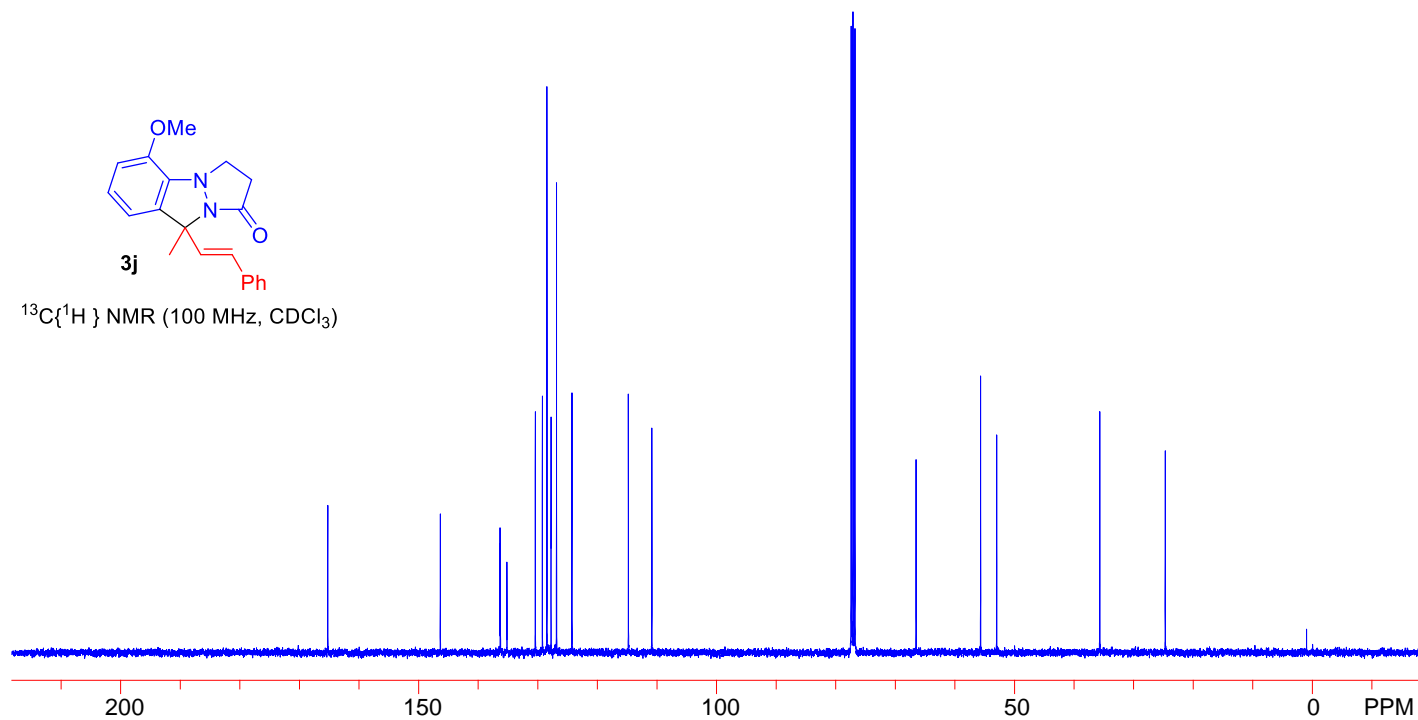

7.362  
7.360  
7.348  
7.273  
7.270  
7.261  
7.249  
7.208  
7.206  
7.204  
7.197  
7.194  
7.190  
7.183  
7.181  
7.180  
6.892  
6.597  
6.527  
6.500  
6.432  
6.406  
3.845  
3.837  
3.831  
3.823  
3.817  
3.809  
3.430  
3.416  
3.412  
3.402  
3.398  
3.385  
3.009  
2.995  
2.992  
2.983  
2.978  
2.968  
2.965  
2.951  
2.795  
2.788  
2.782  
2.774  
2.769  
2.762  
2.755  
2.747  
2.264  
2.237  
2.027

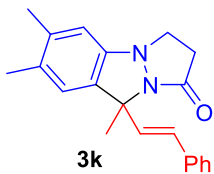

$^1\text{H}$  NMR (600 MHz,  $\text{CDCl}_3$ )

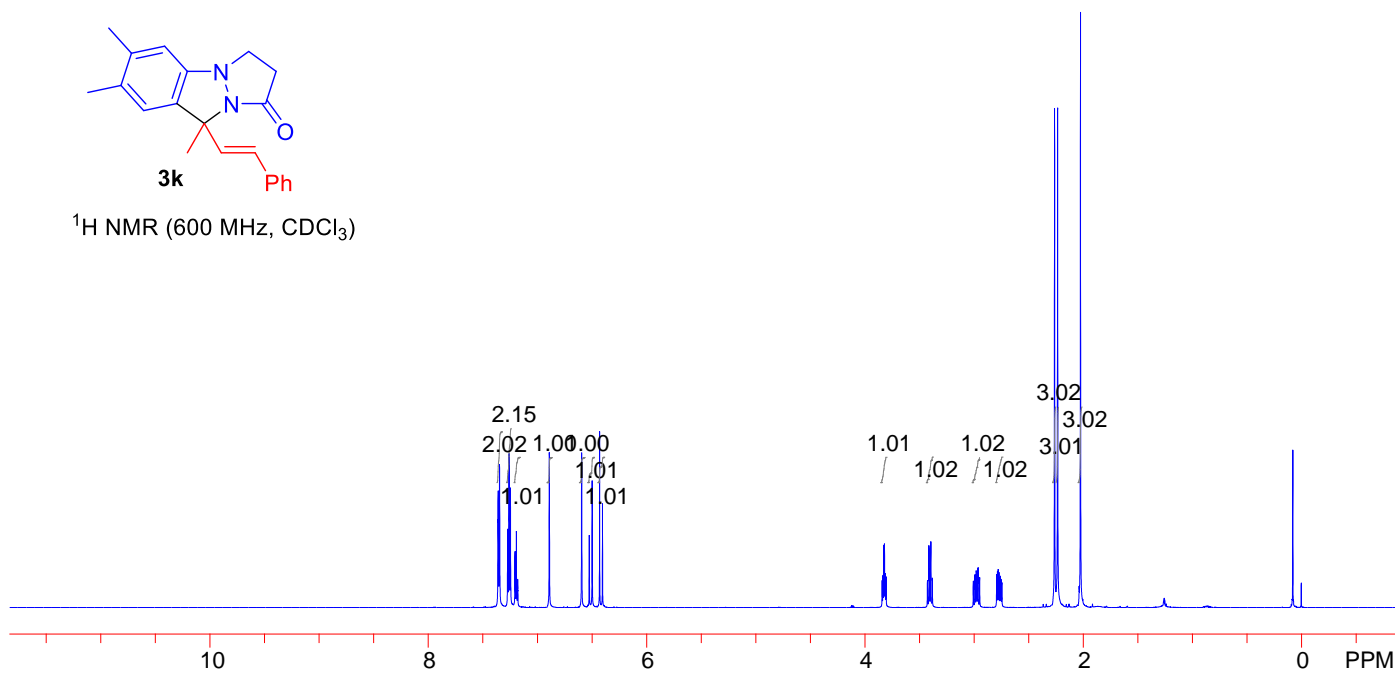

164.735  
145.385  
137.513  
136.393  
132.534  
131.304  
130.626  
128.997  
128.508  
127.803  
126.897  
123.546  
111.370  
77.372  
77.160  
76.948  
66.176  
51.781  
35.549  
24.578  
20.253  
19.680

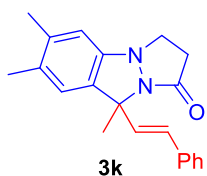

$^{13}\text{C}\{^1\text{H}\}$  NMR (150 MHz,  $\text{CDCl}_3$ )

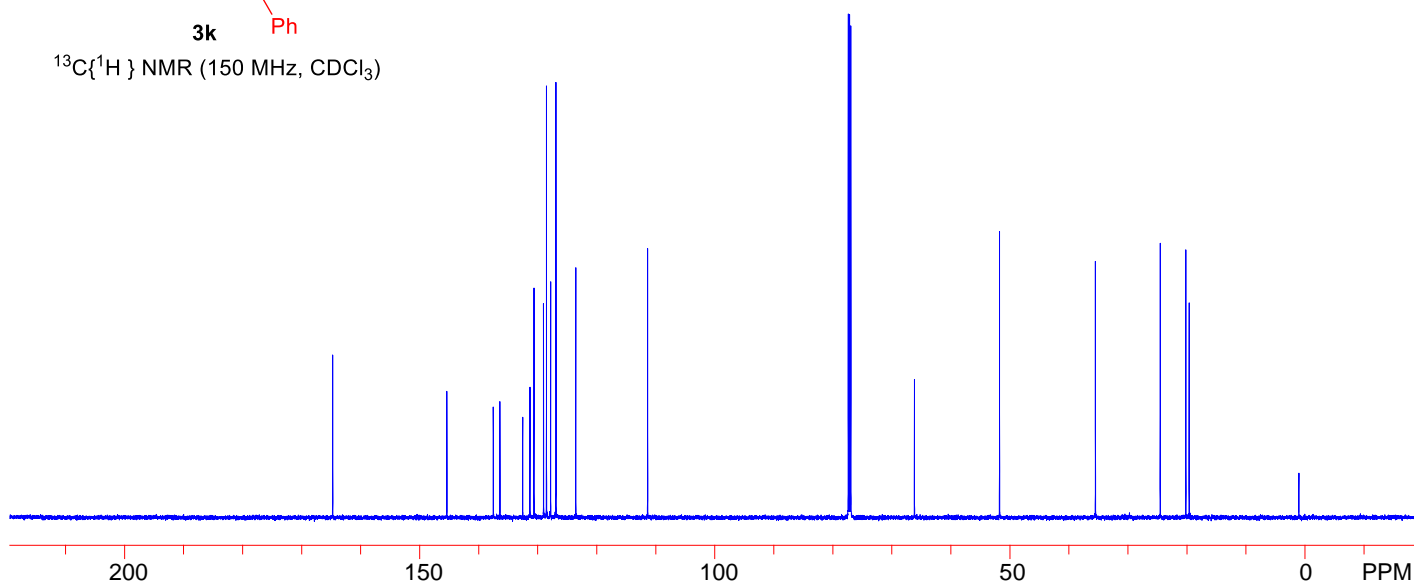



7.354  
7.350  
7.332  
7.286  
7.279  
7.276  
7.268  
7.264  
7.256  
7.249  
7.241  
7.238  
7.222  
7.219  
7.216  
7.207  
7.201  
7.195  
7.183  
7.156  
7.138  
7.050  
7.048  
7.031  
7.029  
7.013  
7.011  
6.773  
6.753  
6.509  
6.469  
6.414  
6.374  
3.668  
3.647  
3.224  
3.203  
2.055  
1.414  
1.292

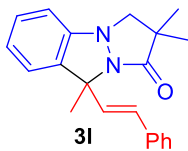

$^1\text{H}$  NMR (400 MHz,  $\text{CDCl}_3$ )

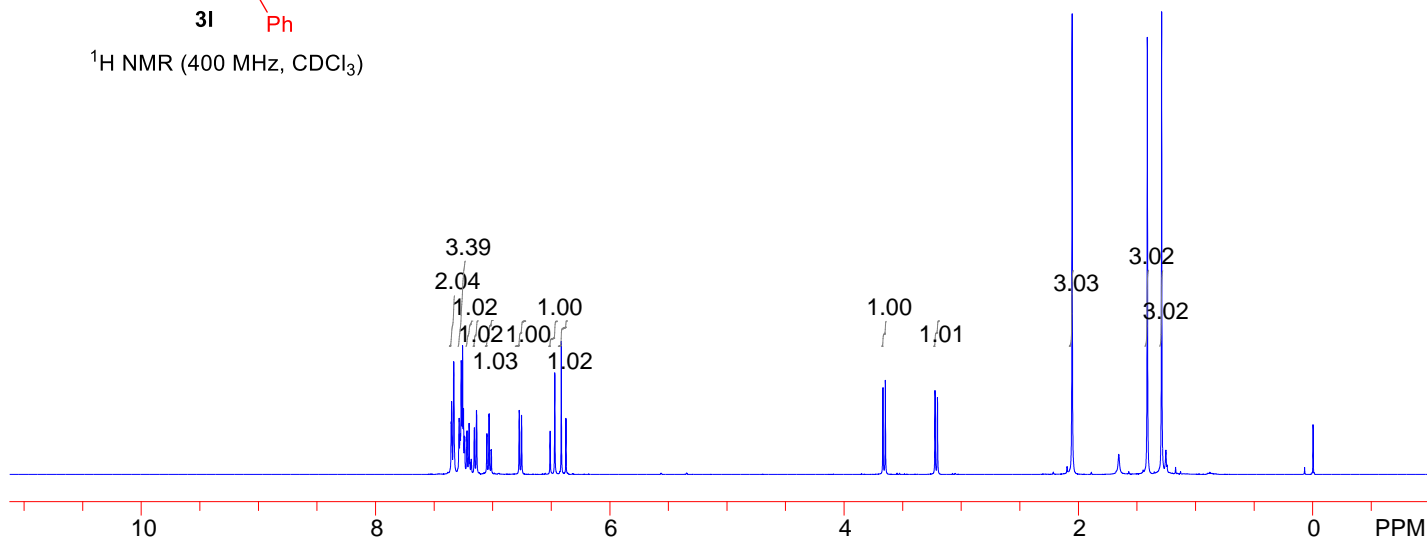

170.009  
147.215  
136.434  
135.008  
130.442  
129.073  
128.870  
128.589  
127.878  
126.950  
122.750  
122.600  
109.989  
77.371  
77.160  
76.949  
66.144  
64.114  
45.978  
24.610  
23.319  
22.776

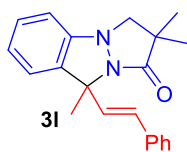

$^{13}\text{C}\{^1\text{H}\}$  NMR (150 MHz,  $\text{CDCl}_3$ )

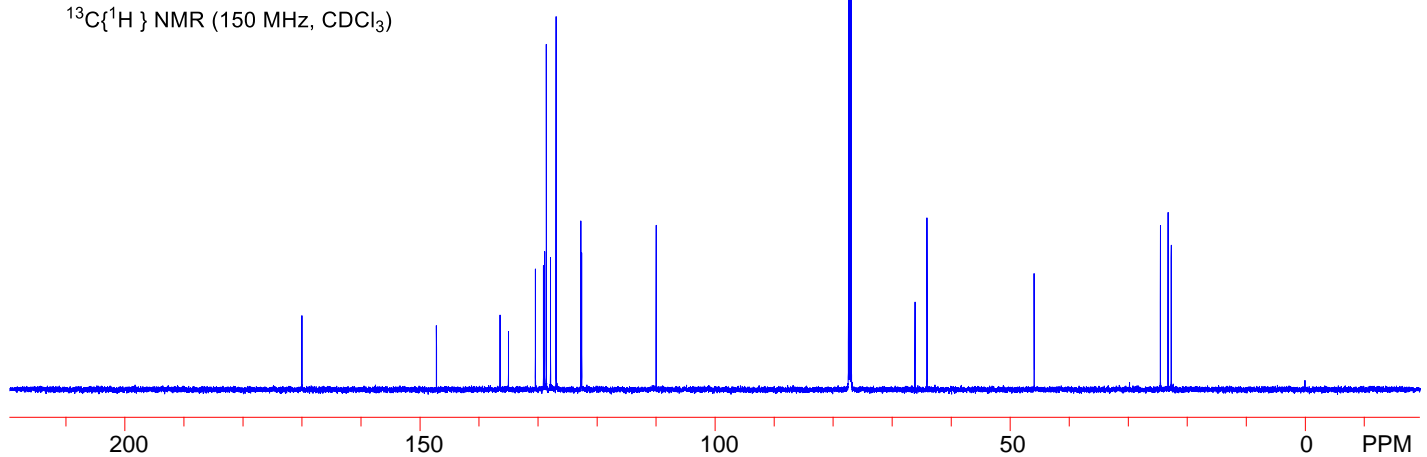

7.352  
7.349  
7.331  
7.277  
7.259  
7.245  
7.240  
7.208  
7.195  
7.190  
7.184  
7.172  
7.060  
7.059  
7.040  
6.934  
6.668  
6.648  
6.512  
6.473  
6.385  
6.346  
3.627  
3.606  
3.166  
3.146  
2.322  
2.030  
1.398  
1.273

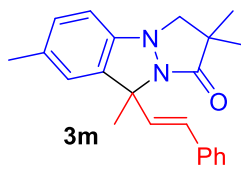

$^1\text{H}$  NMR (400 MHz,  $\text{CDCl}_3$ )

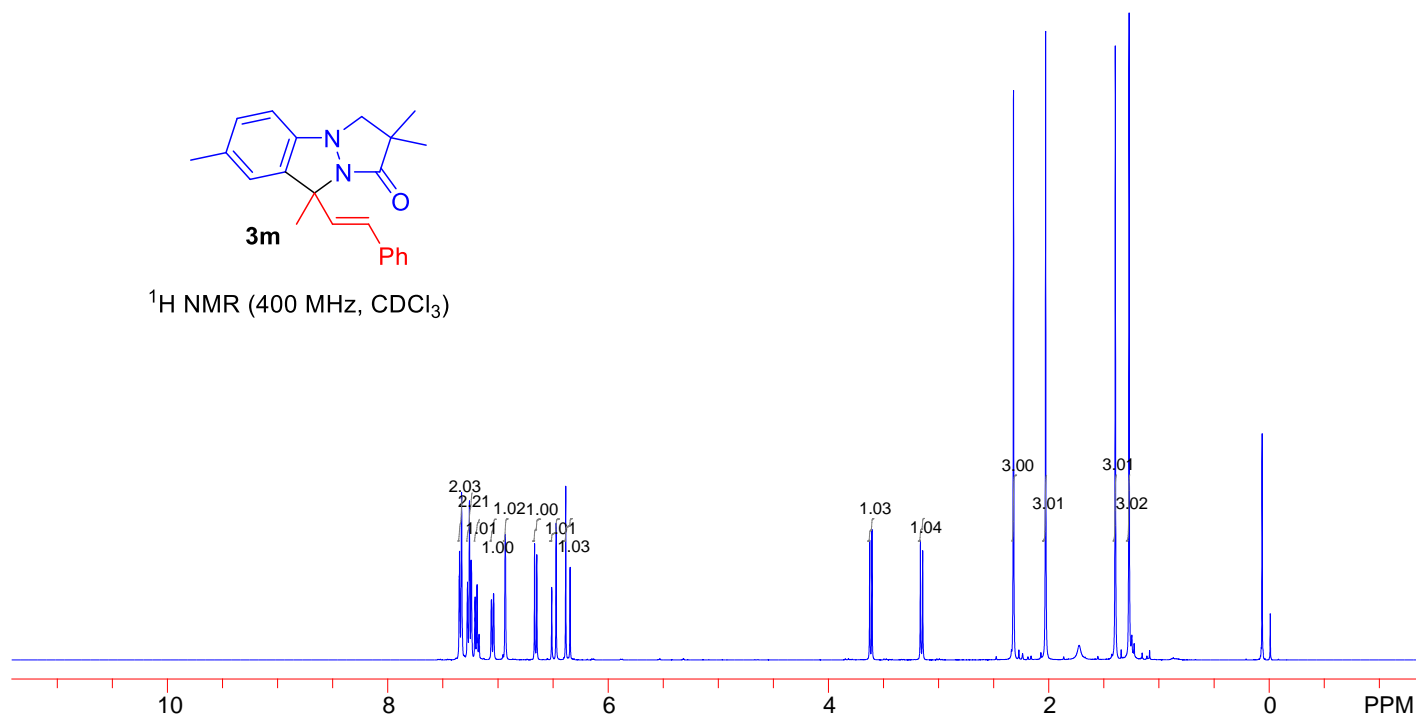

170.095  
145.046  
136.467  
135.234  
132.476  
130.543  
129.386  
128.899  
128.560  
127.833  
126.931  
123.063  
109.857  
77.478  
77.160  
76.842  
66.109  
64.561  
45.983  
24.518  
23.265  
22.775  
21.148

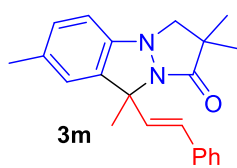

$^{13}\text{C}\{^1\text{H}\}$  NMR (100 MHz,  $\text{CDCl}_3$ )

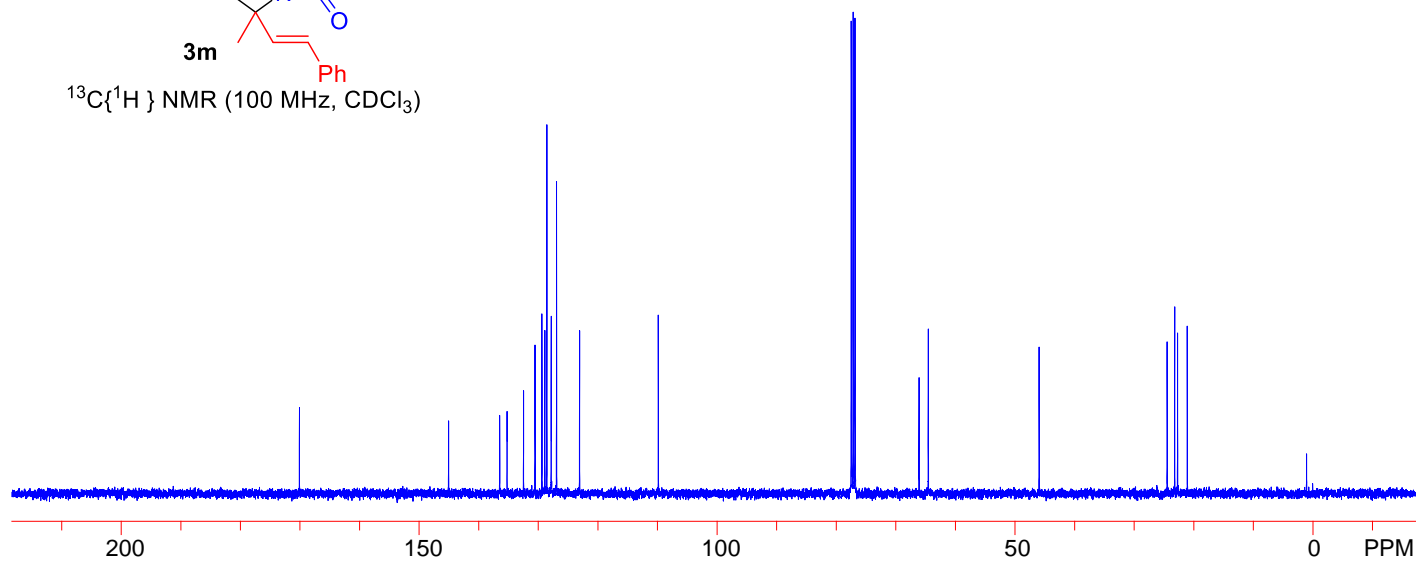

7.360  
7.356  
7.338  
7.288  
7.284  
7.270  
7.267  
7.258  
7.251  
7.224  
7.221  
7.218  
7.209  
7.203  
7.197  
7.188  
7.185  
7.182  
6.828  
6.822  
6.807  
6.800  
6.713  
6.708  
6.687  
6.526  
6.487  
6.397  
6.357  
3.789  
3.617  
3.597  
3.149  
3.129  
2.046  
1.403  
1.282

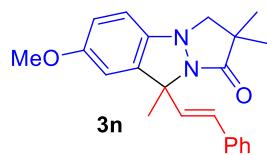

$^1\text{H}$  NMR (400 MHz,  $\text{CDCl}_3$ )

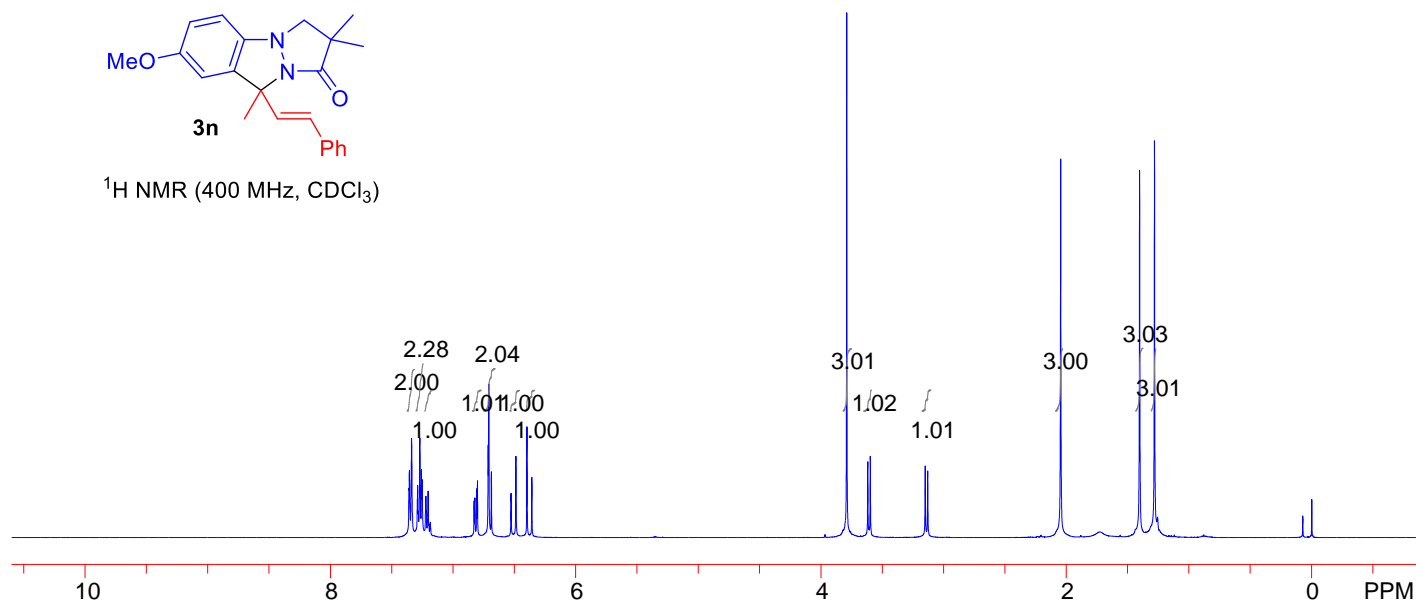

170.252  
156.271  
141.140  
136.397  
136.350  
130.306  
129.150  
128.574  
127.892  
126.955  
114.237  
110.790  
108.781  
77.478  
77.160  
76.842  
66.313  
65.046  
56.038  
46.048  
24.460  
23.186  
22.739

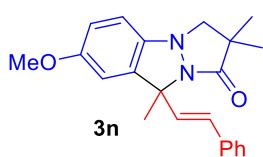

$^{13}\text{C}\{^1\text{H}\}$  NMR (100 MHz,  $\text{CDCl}_3$ )

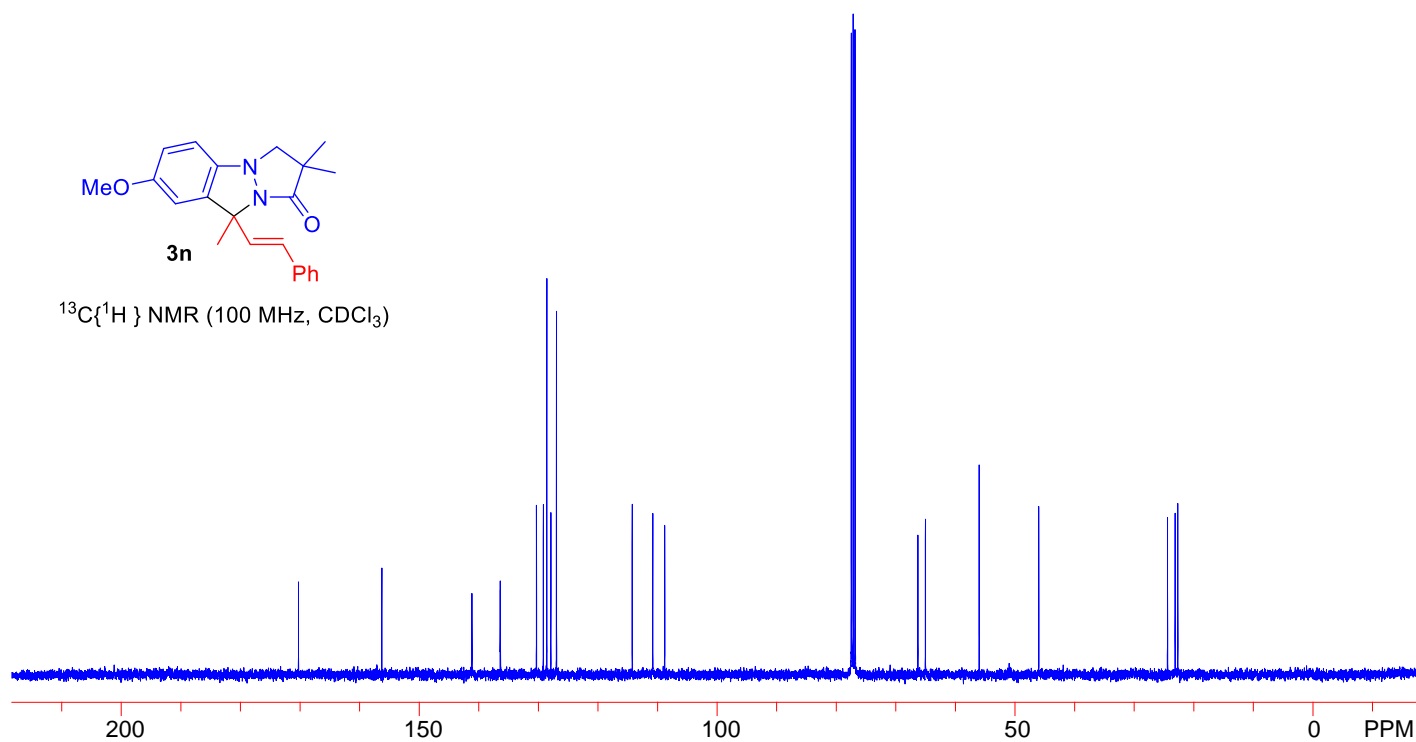

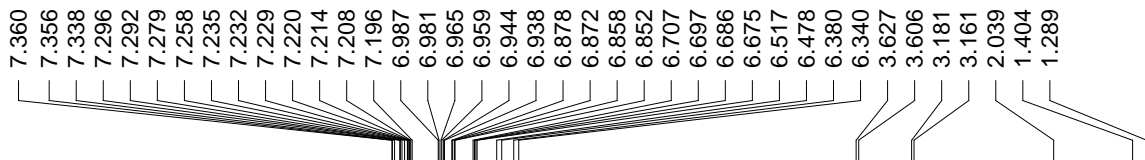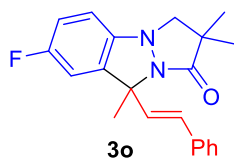

$^1\text{H}$  NMR (400 MHz,  $\text{CDCl}_3$ )

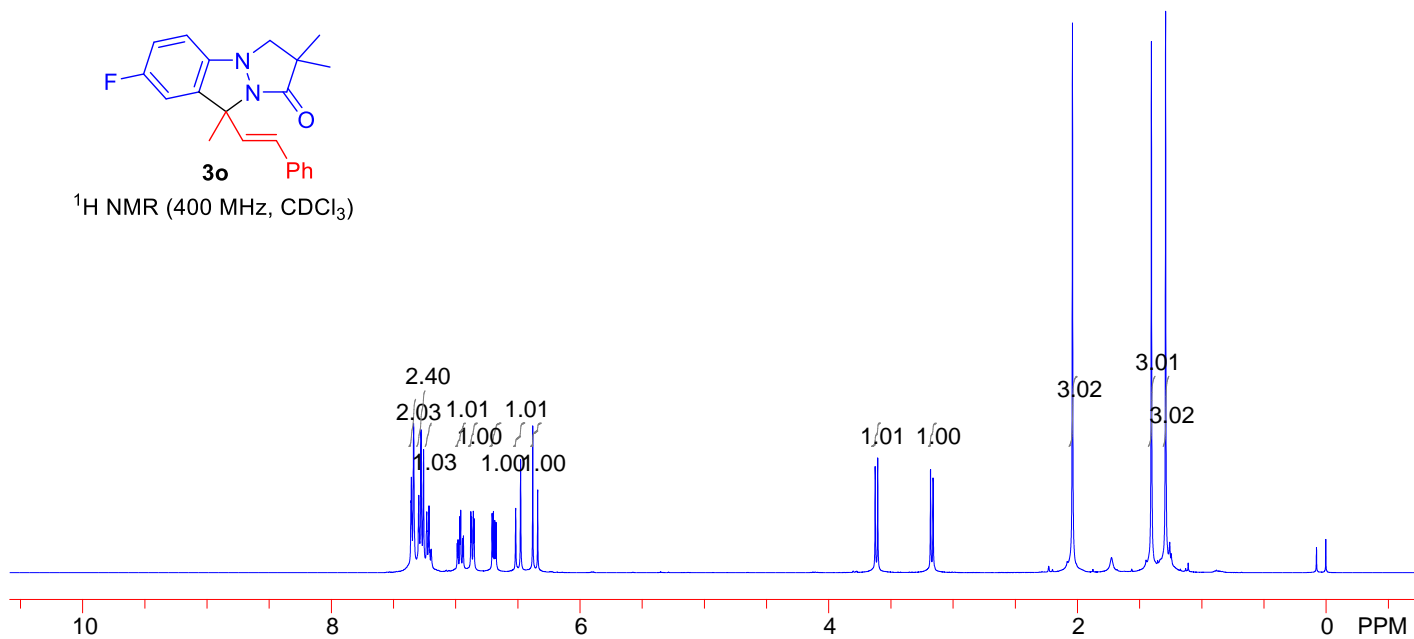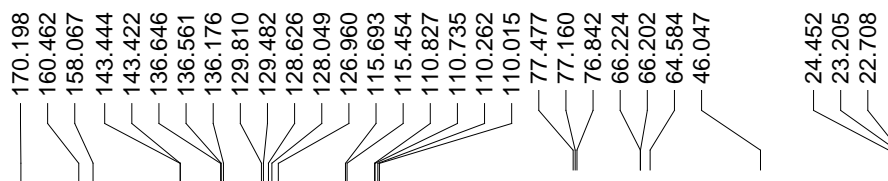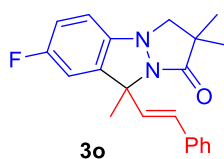

$^{13}\text{C}\{^1\text{H}\}$  NMR (100 MHz,  $\text{CDCl}_3$ )

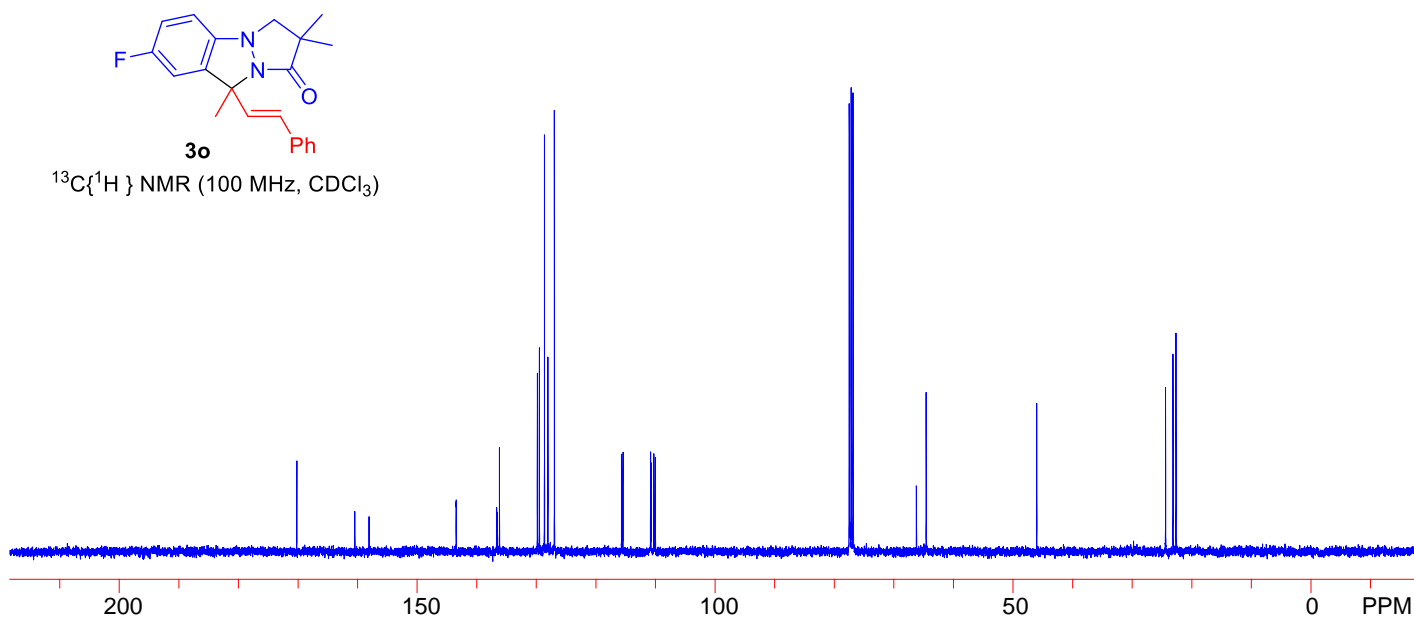

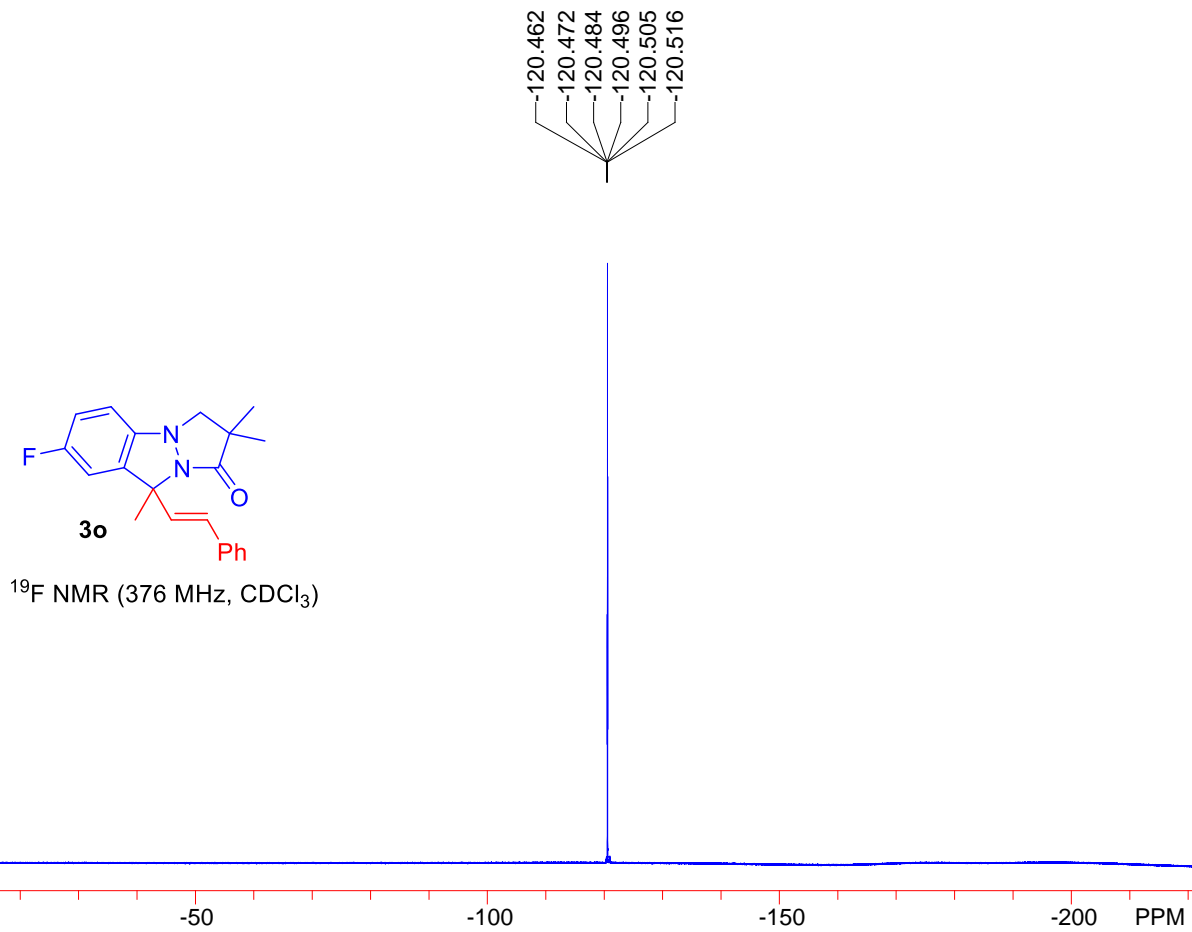

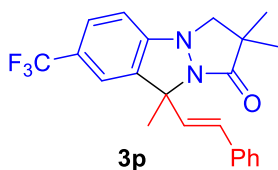

$^1\text{H}$  NMR (400 MHz,  $\text{CDCl}_3$ )

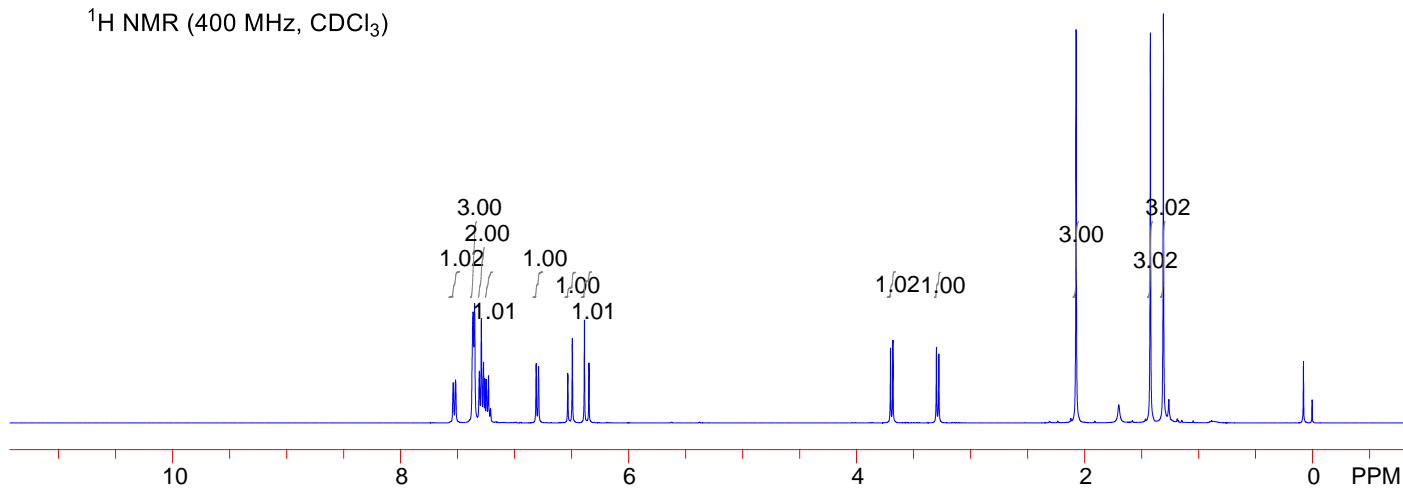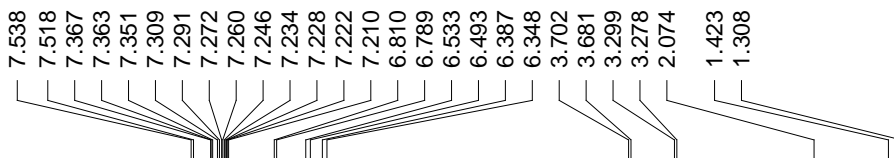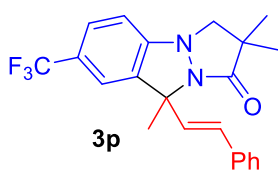

$^{13}\text{C}\{^1\text{H}\}$  NMR (100 MHz,  $\text{CDCl}_3$ )

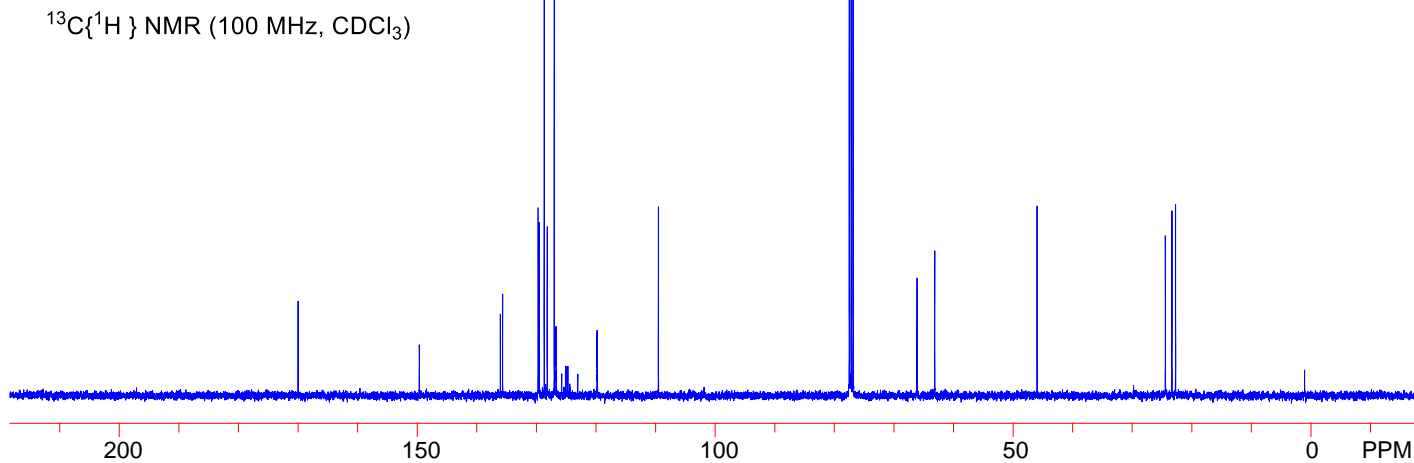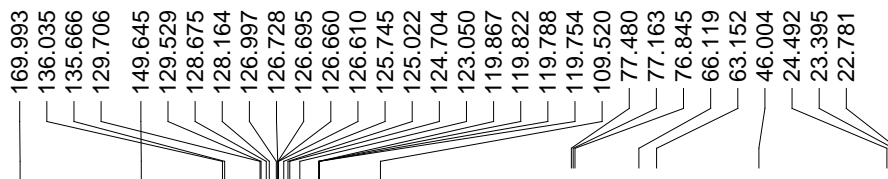

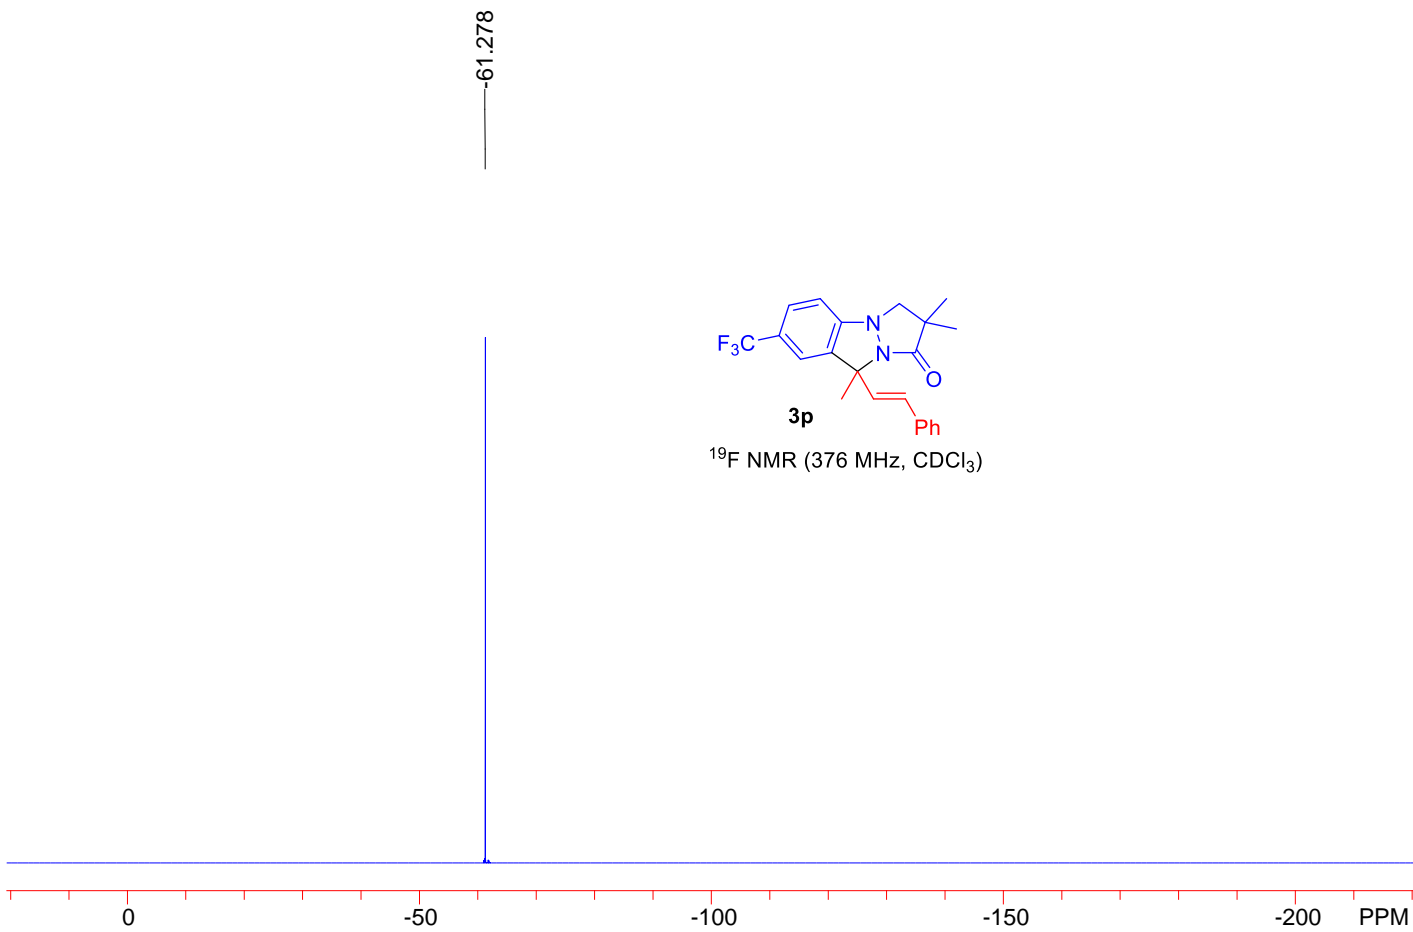

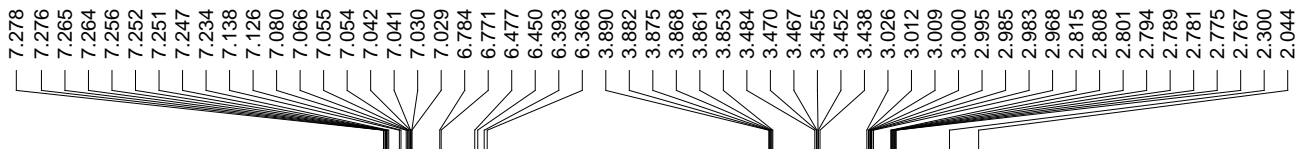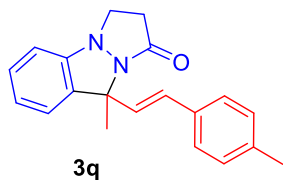

$^1\text{H NMR}$  (600 MHz,  $\text{CDCl}_3$ )

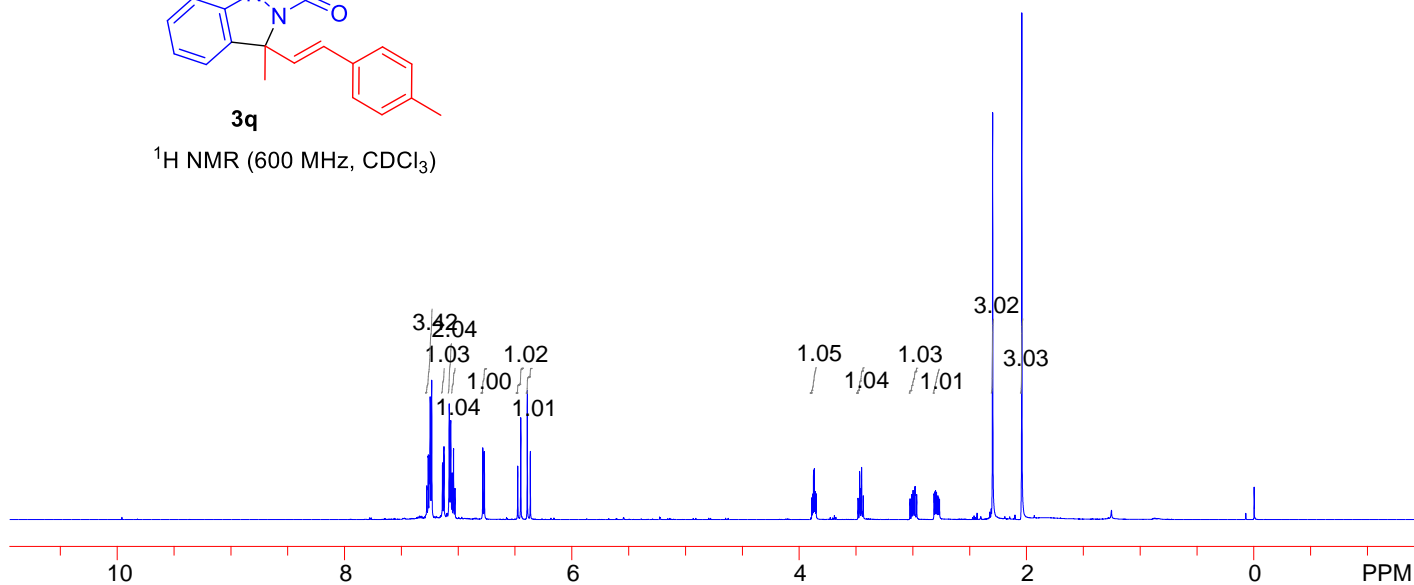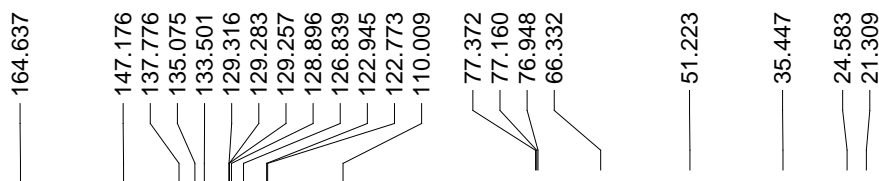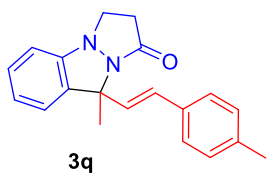

$^{13}\text{C}\{^1\text{H}\}$  NMR (150 MHz,  $\text{CDCl}_3$ )

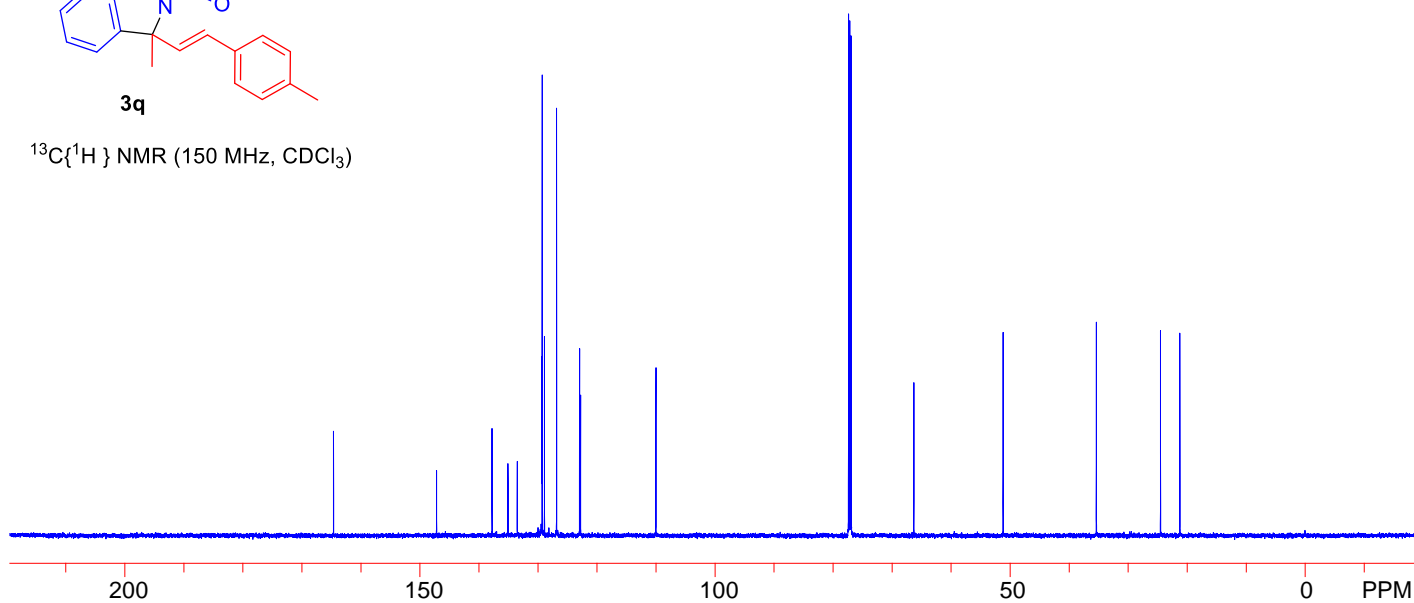



7.283  
7.270  
7.260  
7.258  
7.256  
7.141  
7.128  
7.113  
7.100  
7.059  
7.057  
7.046  
7.045  
7.034  
7.032  
6.789  
6.776  
6.493  
6.467  
6.409  
6.383  
3.890  
3.882  
3.876  
3.868  
3.861  
3.854  
3.494  
3.480  
3.477  
3.466  
3.463  
3.449  
3.028  
3.014  
3.012  
3.002  
2.997  
2.987  
2.985  
2.970  
2.822  
2.815  
2.809  
2.801  
2.796  
2.789  
2.782  
2.774  
2.624  
2.612  
2.599  
2.586  
2.050  
1.213  
1.201  
1.188

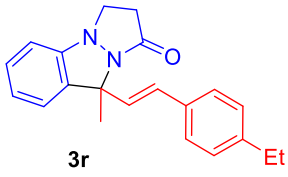

$^1\text{H NMR}$  (600 MHz,  $\text{CDCl}_3$ )

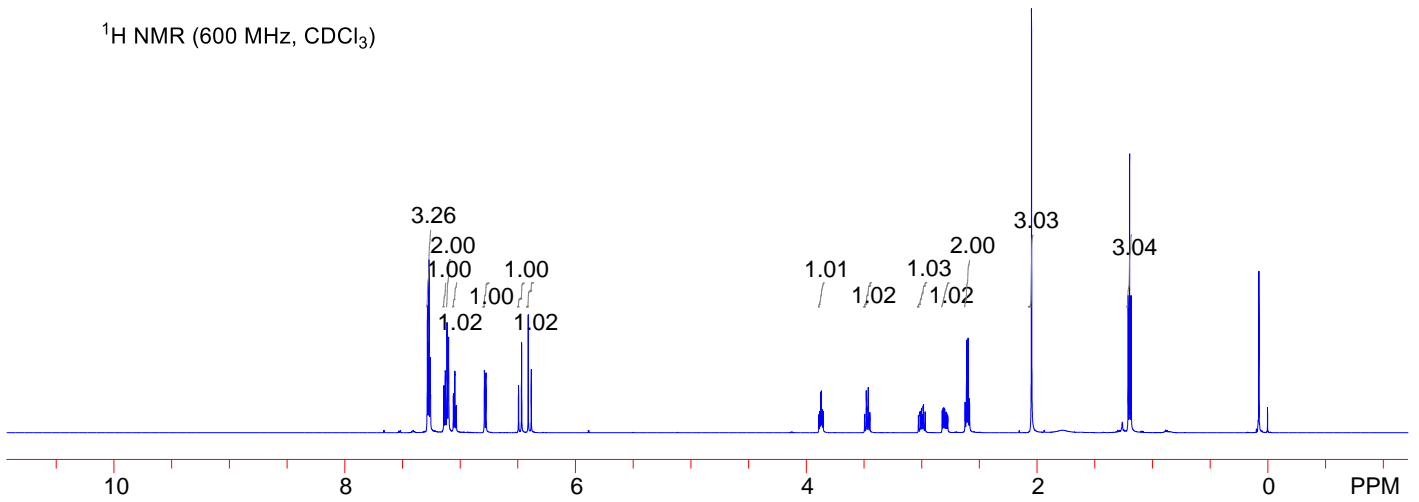

164.594  
147.177  
144.199  
135.063  
133.741  
129.403  
129.256  
128.876  
128.076  
126.899  
122.918  
122.760  
109.991  
77.372  
77.160  
76.948  
66.294  
51.210  
35.427  
28.693  
24.568  
15.626

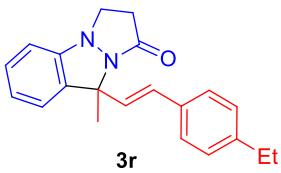

$^{13}\text{C}\{^1\text{H}\}$  NMR (150 MHz,  $\text{CDCl}_3$ )

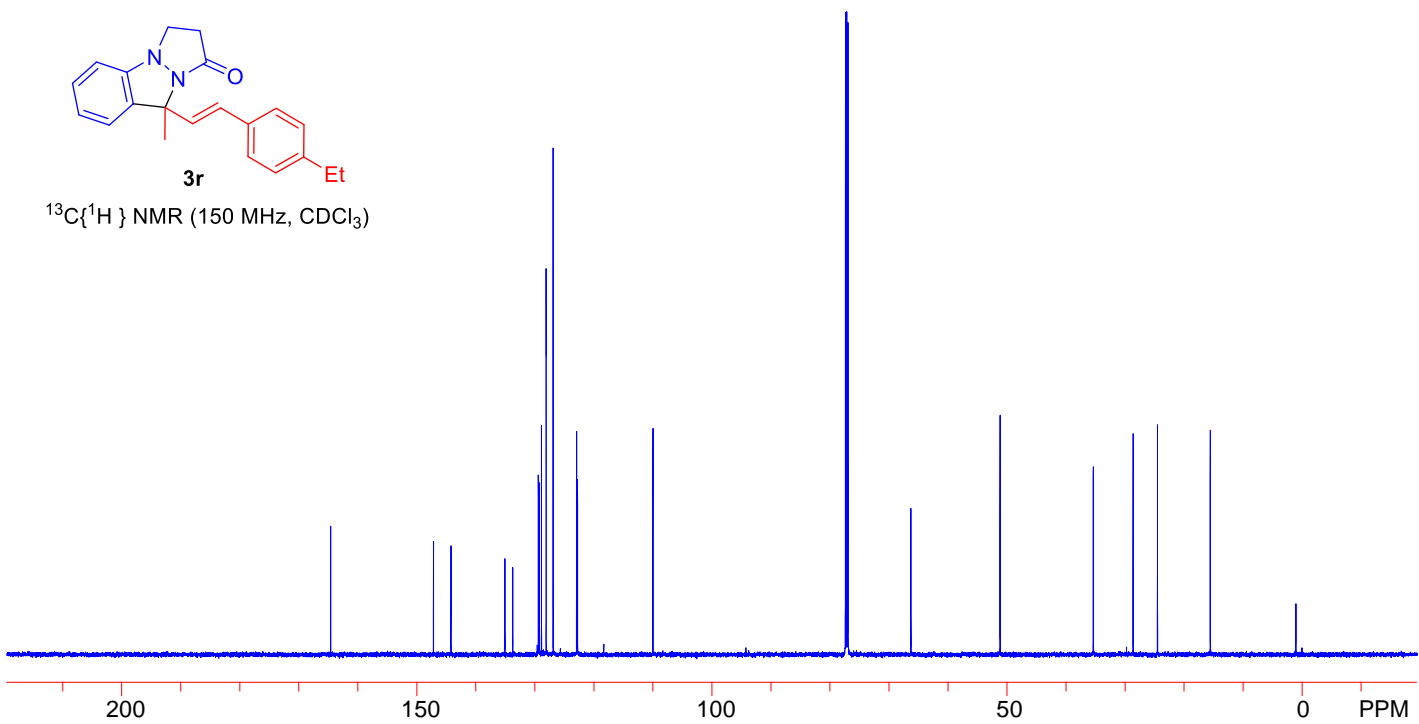

7.586  
7.583  
7.565  
7.529  
7.508  
7.435  
7.415  
7.396  
7.339  
7.321  
7.299  
7.297  
7.280  
7.278  
7.261  
7.258  
7.251  
7.165  
7.147  
7.077  
7.075  
7.058  
7.039  
6.802  
6.782  
6.566  
6.526  
6.493  
6.454  
3.914  
3.904  
3.893  
3.882  
3.872  
3.860  
3.513  
3.482  
3.488  
3.470  
3.466  
3.445  
3.059  
3.037  
3.033  
3.019  
3.011  
2.996  
2.993  
2.971  
2.842  
2.830  
2.821  
2.809  
2.802  
2.790  
2.780  
2.769  
2.071

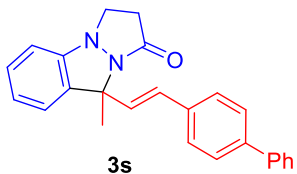

$^1\text{H NMR}$  (400 MHz,  $\text{CDCl}_3$ )

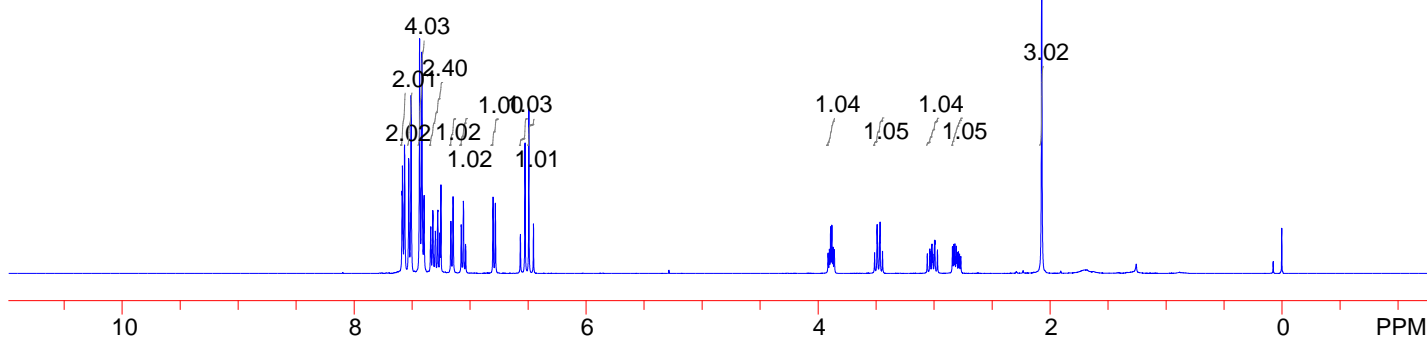

164.687  
140.741  
140.649  
147.220  
135.364  
134.962  
130.458  
128.976  
128.903  
128.881  
127.440  
127.373  
127.251  
127.042  
122.986  
122.766  
110.072  
77.478  
77.160  
76.842  
66.319  
51.258  
35.445  
24.553

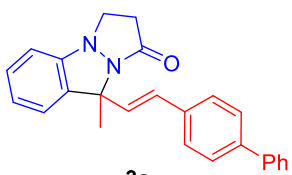

$^{13}\text{C}\{^1\text{H}\}$  NMR (100 MHz,  $\text{CDCl}_3$ )

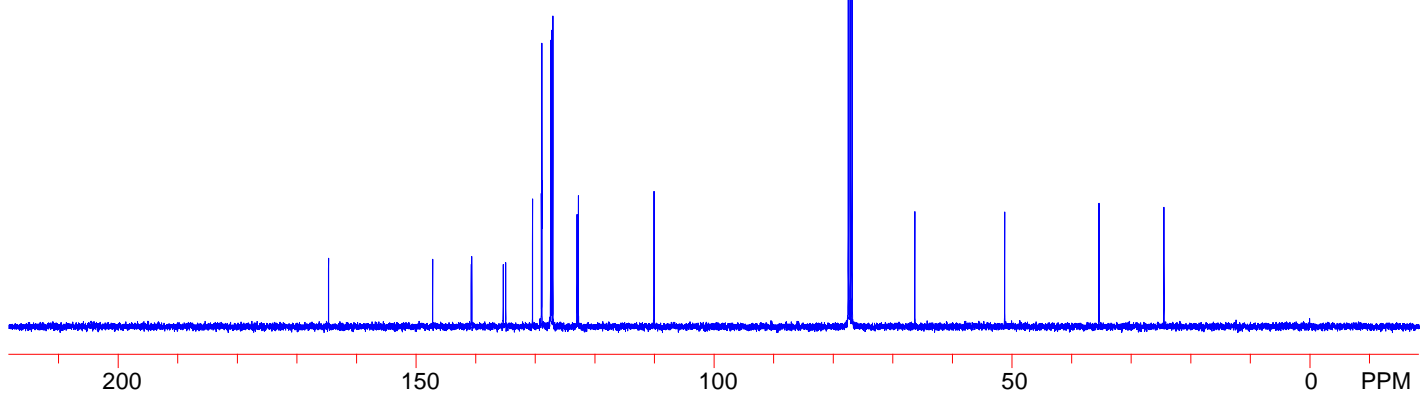

7.262  
7.257  
7.248  
7.240  
7.231  
7.226  
7.222  
7.205  
7.203  
7.186  
7.073  
7.055  
6.998  
6.997  
6.979  
6.978  
6.961  
6.959  
6.914  
6.907  
6.902  
6.885  
6.868  
6.863  
6.726  
6.706  
6.416  
6.376  
6.295  
6.255  
3.837  
3.825  
3.815  
3.804  
3.794  
3.782  
3.782  
3.437  
3.415  
3.411  
3.394  
3.390  
3.368  
2.975  
2.953  
2.949  
2.935  
2.927  
2.913  
2.909  
2.887  
2.764  
2.753  
2.743  
2.732  
2.724  
2.713  
2.703  
2.692  
1.974

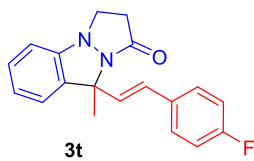

$^1\text{H NMR}$  (400 MHz,  $\text{CDCl}_3$ )

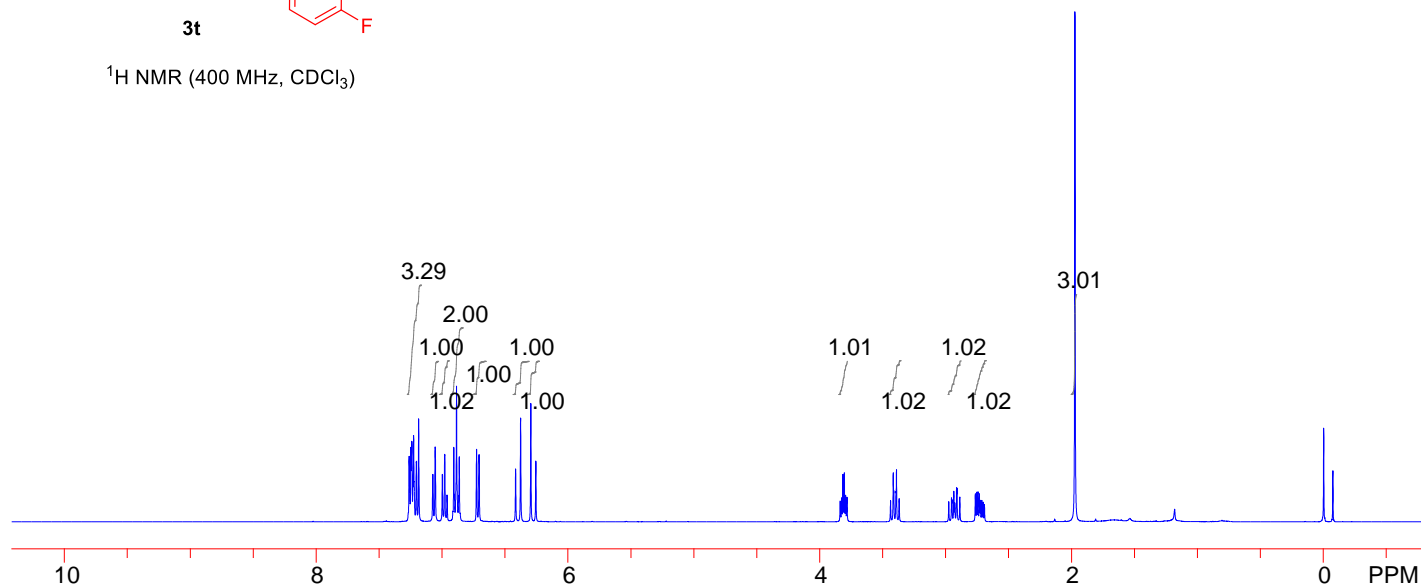

164.714  
163.391  
161.755  
147.186  
134.884  
132.485  
132.465  
130.173  
130.157  
129.010  
128.518  
128.471  
128.192  
123.003  
122.708  
115.579  
115.438  
110.095  
77.372  
77.160  
76.948  
66.220  
51.256  
35.420  
24.539

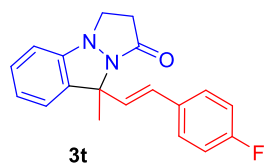

$^{13}\text{C}\{^1\text{H}\}$  NMR (150 MHz,  $\text{CDCl}_3$ )

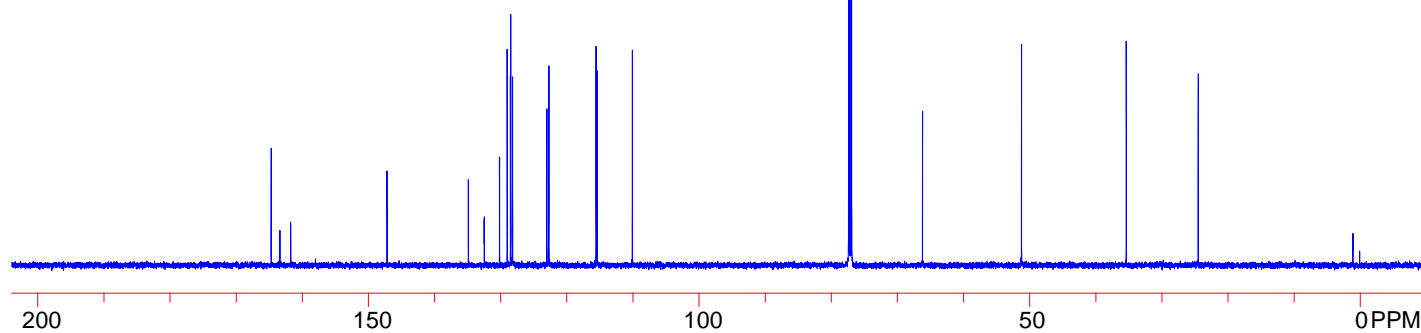

-114.097  
-114.106  
-114.114  
-114.120  
-114.131  
-114.145

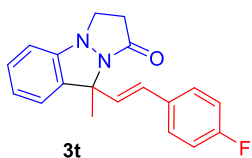

$^{19}\text{F}$  NMR (565 MHz,  $\text{CDCl}_3$ )

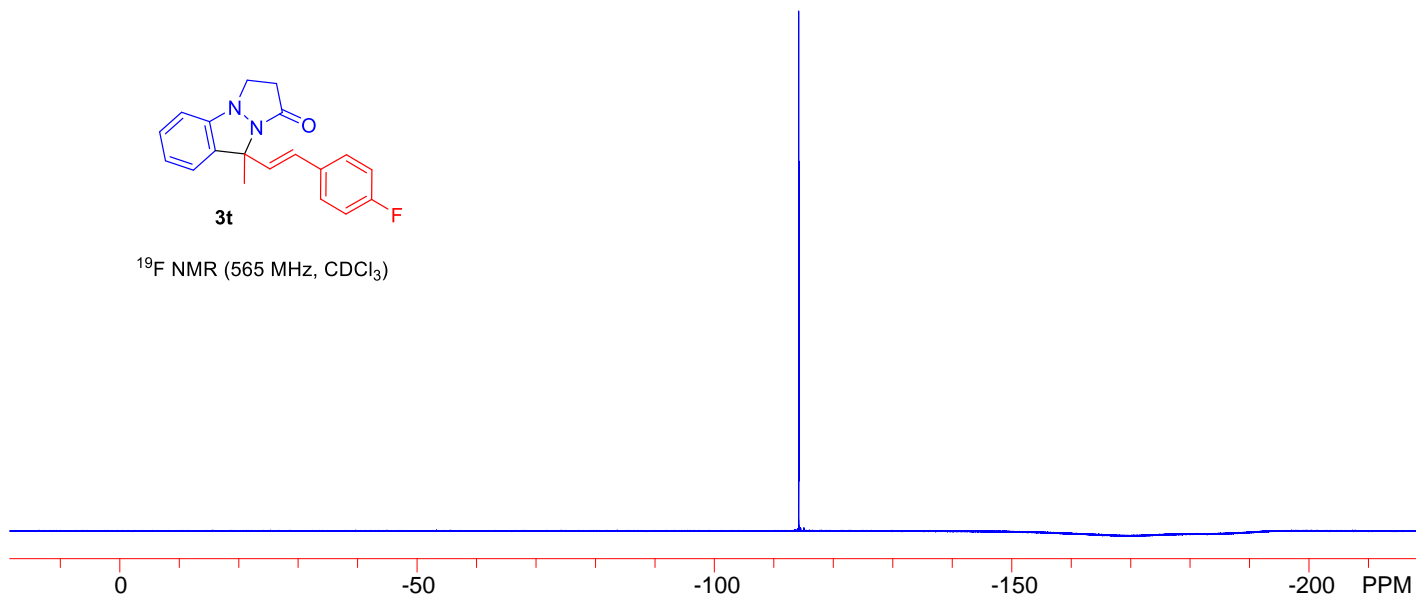

7.404  
7.382  
7.301  
7.298  
7.281  
7.279  
7.260  
7.225  
7.204  
7.144  
7.126  
7.072  
7.053  
7.036  
7.034  
6.800  
6.780  
6.473  
6.434  
6.425  
6.385  
3.918  
3.907  
3.896  
3.885  
3.874  
3.864  
3.507  
3.486  
3.482  
3.464  
3.460  
3.439  
3.053  
3.031  
3.027  
3.013  
3.005  
2.991  
2.987  
2.965  
2.836  
2.826  
2.815  
2.805  
2.796  
2.785  
2.775  
2.764  
2.046

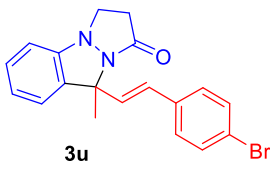

<sup>1</sup>H NMR (400 MHz, CDCl<sub>3</sub>)

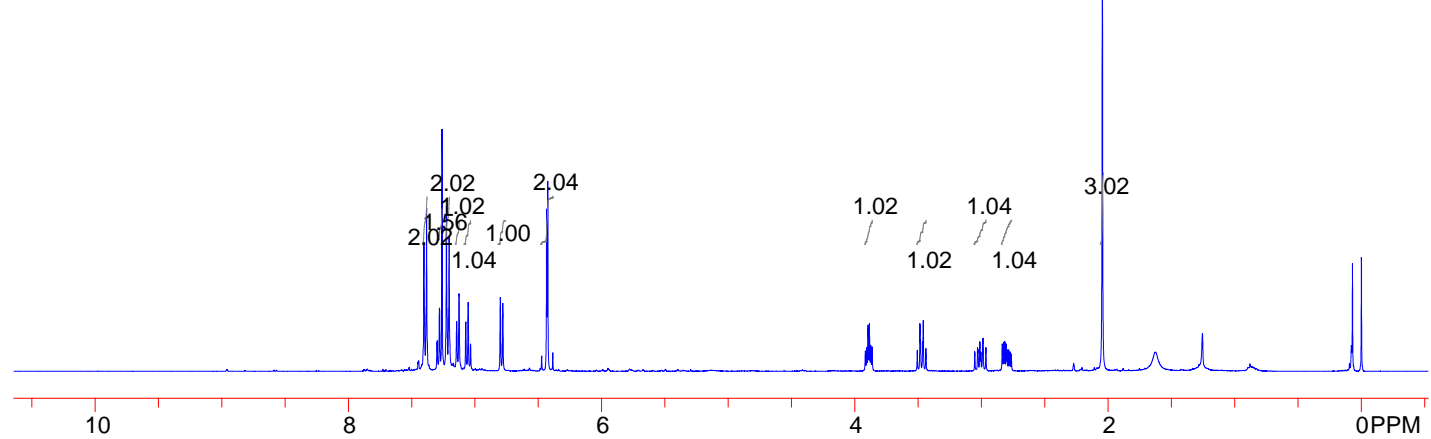

164.793  
147.185  
135.303  
134.728  
131.712  
131.168  
129.079  
128.487  
128.193  
123.051  
122.690  
121.769  
110.132  
77.478  
77.160  
76.842  
66.230  
51.277  
35.396  
24.463

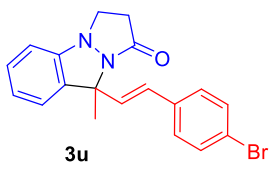

<sup>13</sup>C{<sup>1</sup>H} NMR (100 MHz, CDCl<sub>3</sub>)

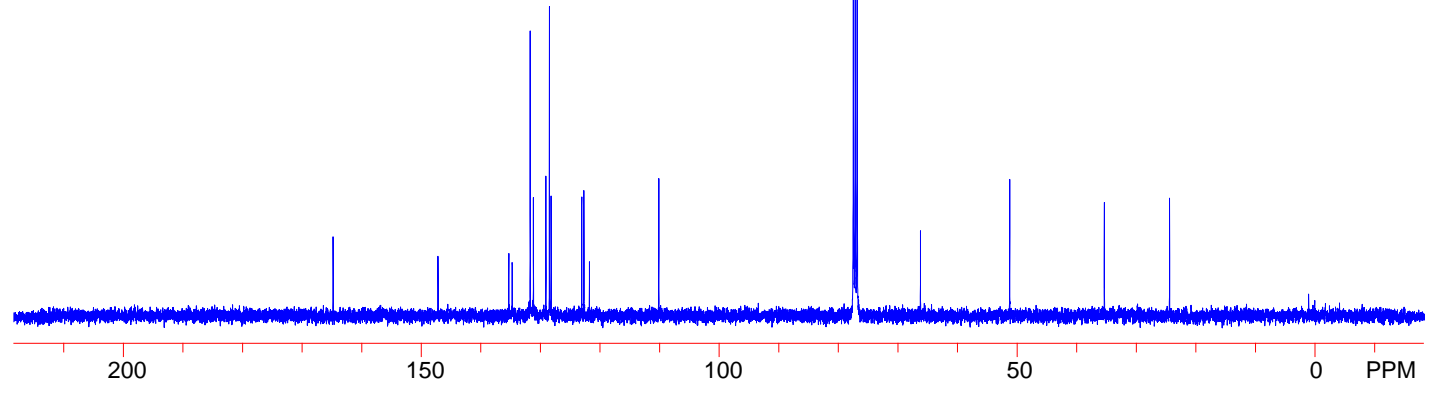

7.528  
7.514  
7.452  
7.438  
7.301  
7.288  
7.276  
7.260  
7.154  
7.142  
7.076  
7.064  
7.051  
6.806  
6.793  
6.567  
6.541  
6.525  
6.498  
3.919  
3.912  
3.905  
3.897  
3.890  
3.883  
3.507  
3.492  
3.490  
3.475  
3.461  
3.049  
3.034  
3.032  
3.022  
3.017  
3.007  
3.005  
2.990  
2.837  
2.830  
2.823  
2.816  
2.810  
2.803  
2.796  
2.789  
2.066

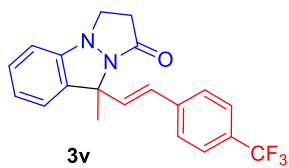

$^1\text{H NMR}$  (600 MHz,  $\text{CDCl}_3$ )

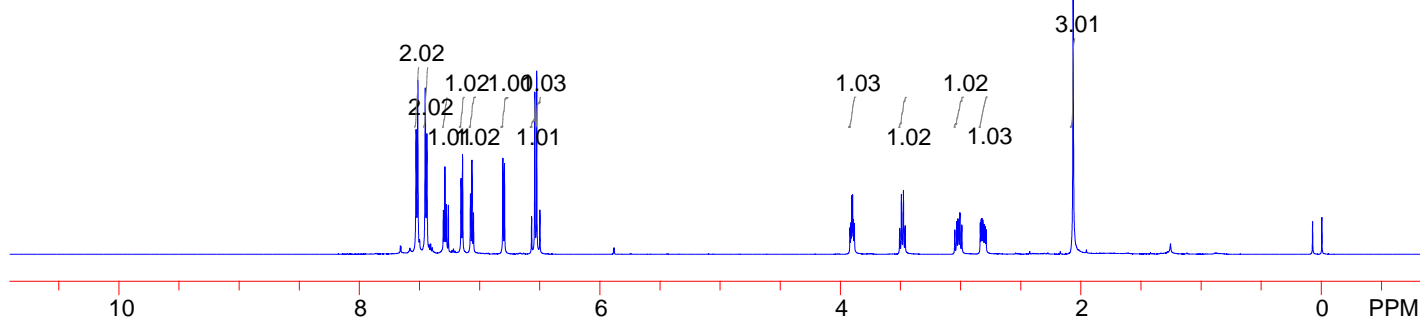

164.900  
134.528  
147.182  
139.851  
132.999  
129.798  
129.587  
129.158  
127.966  
127.091  
125.561  
125.543  
125.520  
125.488  
125.154  
123.351  
123.096  
122.642  
110.173  
77.372  
77.160  
76.948  
66.171  
51.280  
35.356  
24.385

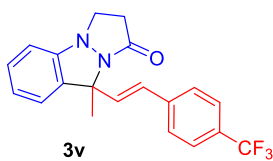

$^{13}\text{C}\{^1\text{H}\}$  NMR (150 MHz,  $\text{CDCl}_3$ )

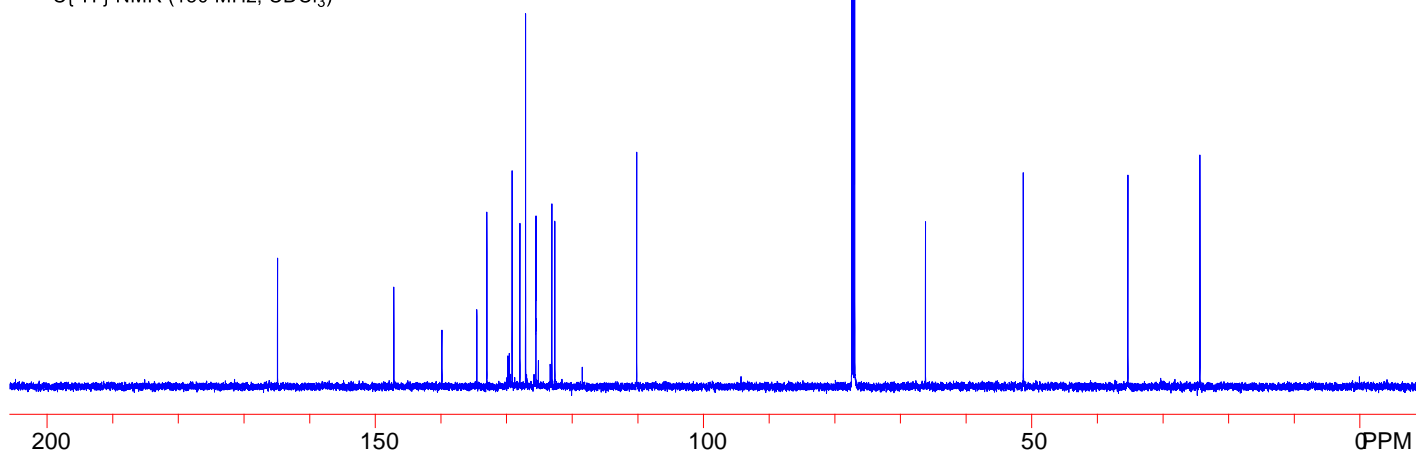

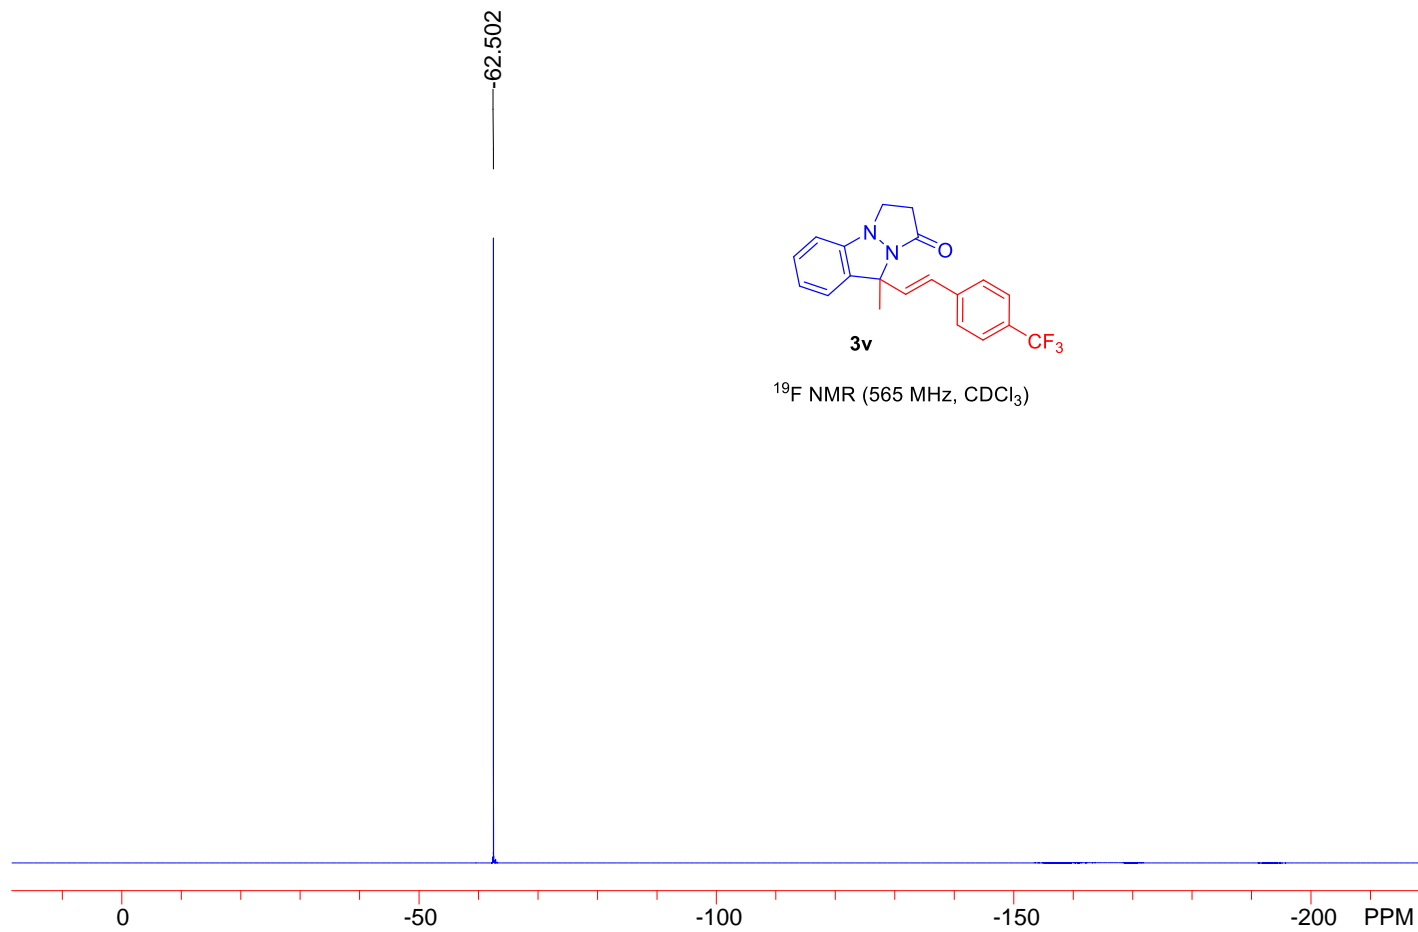

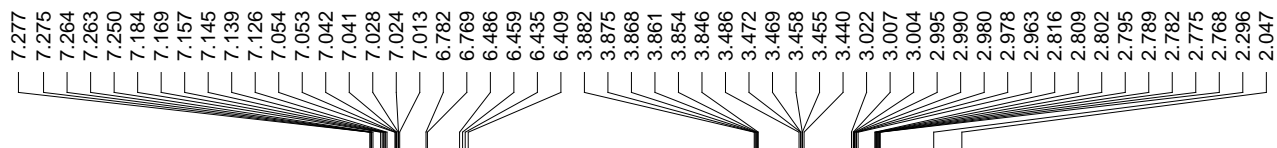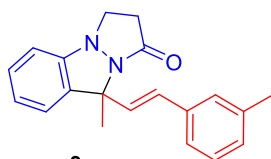

$^1\text{H}$  NMR (600 MHz,  $\text{CDCl}_3$ )

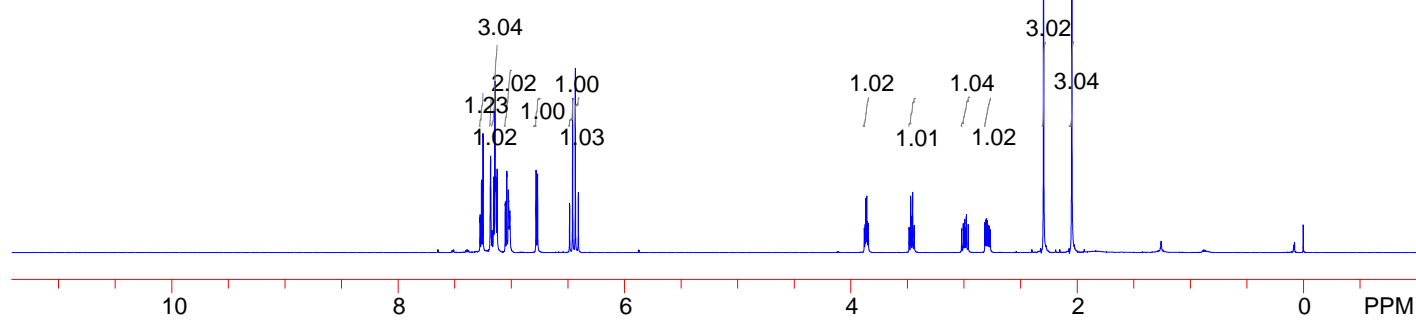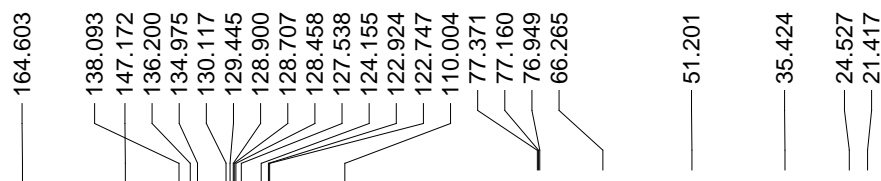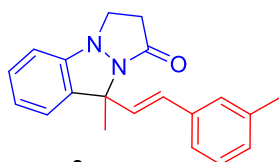

$^{13}\text{C}\{^1\text{H}\}$  NMR (150 MHz,  $\text{CDCl}_3$ )

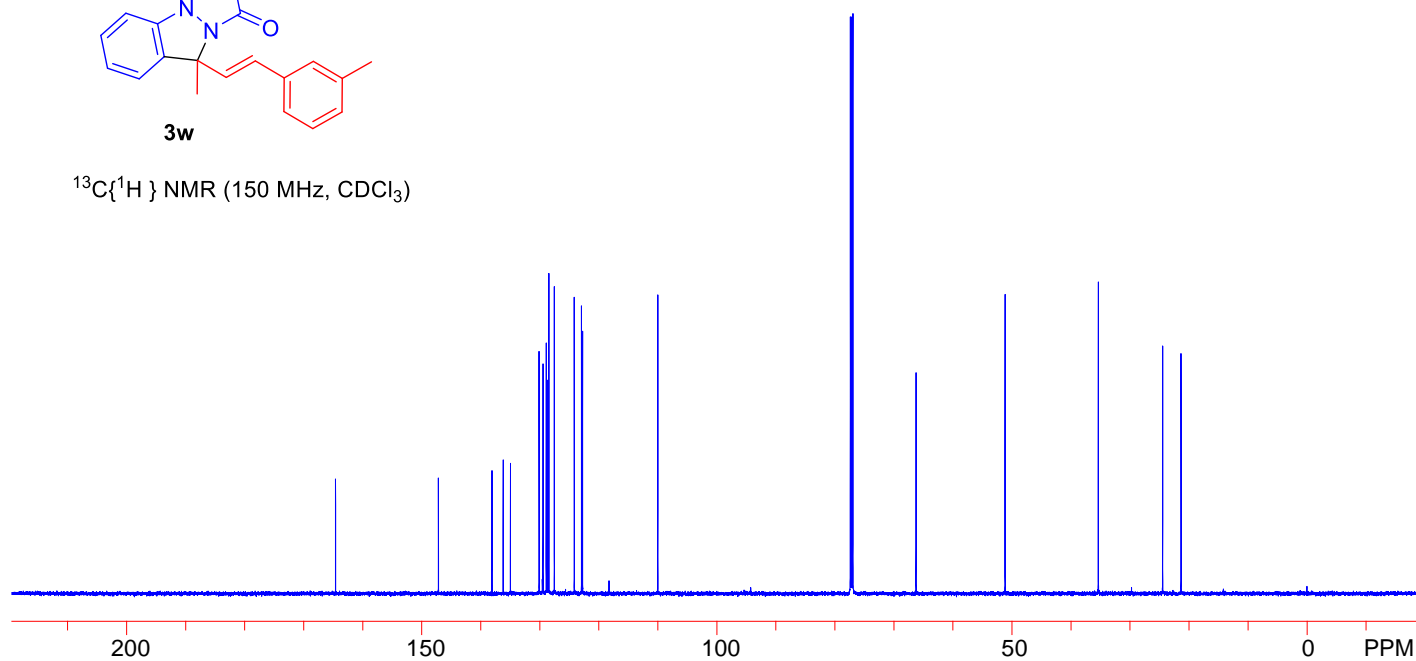



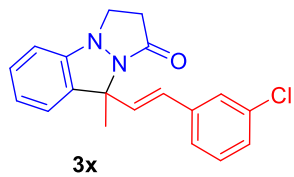

$^1\text{H NMR}$  (400 MHz,  $\text{CDCl}_3$ )

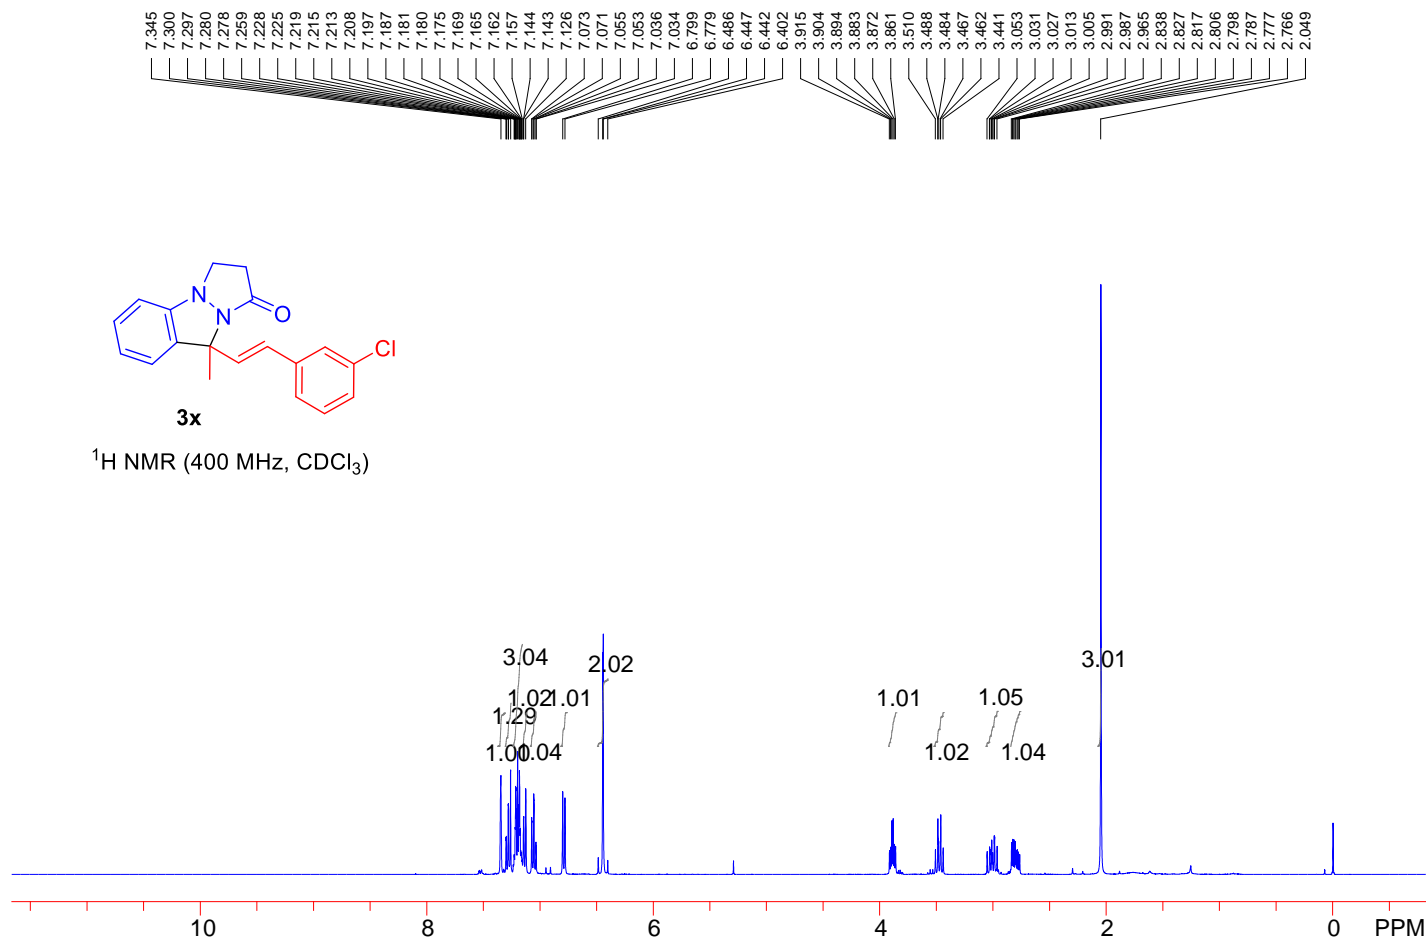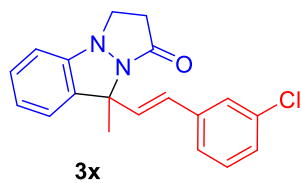

$^{13}\text{C}\{^1\text{H}\}$  NMR (150 MHz,  $\text{CDCl}_3$ )

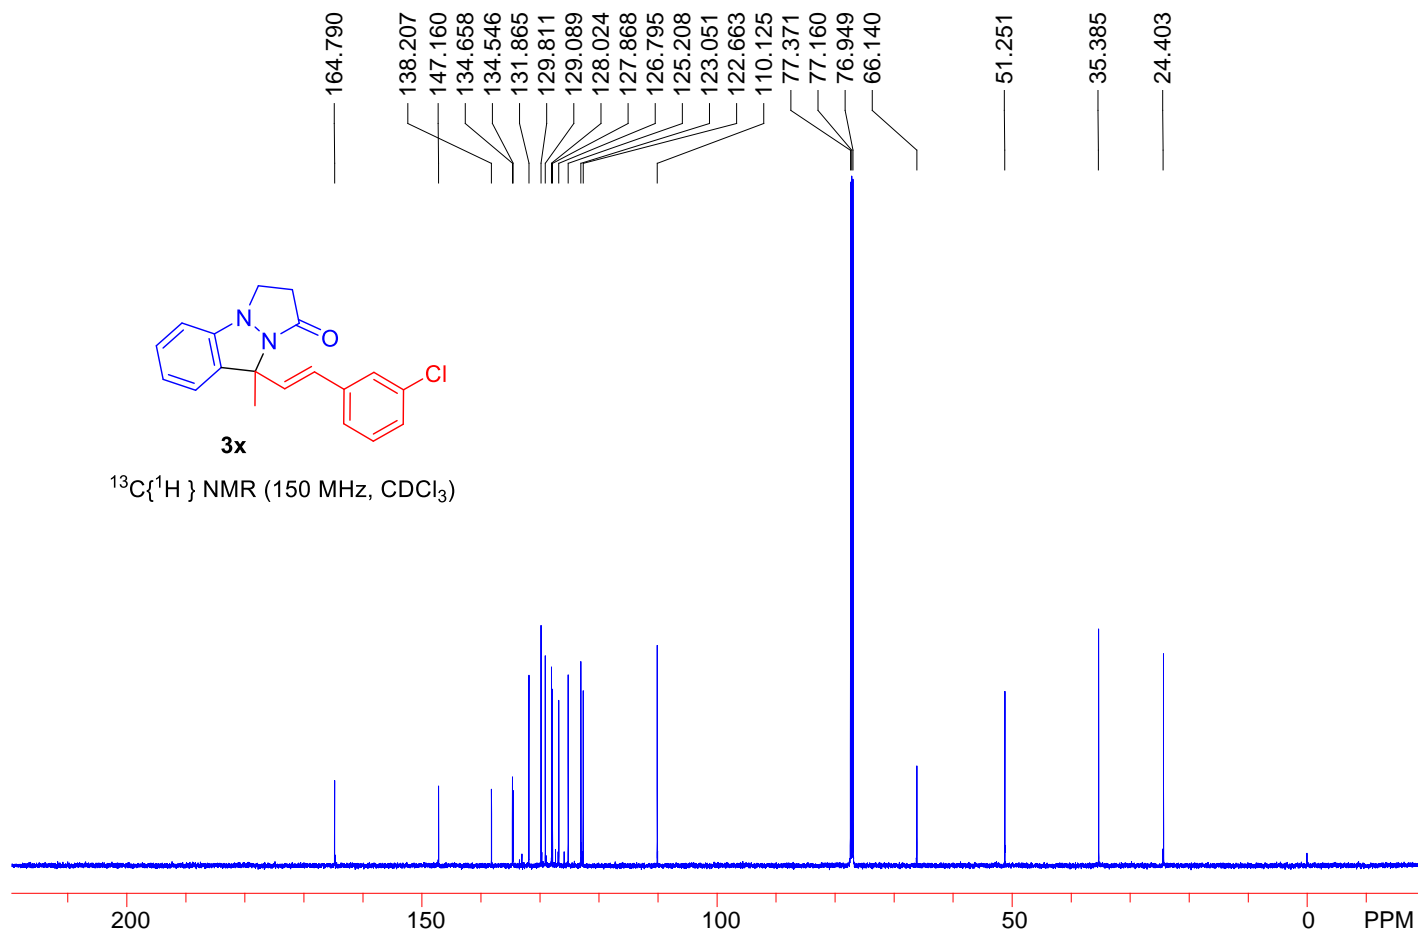

7.417  
7.404  
7.396  
7.288  
7.285  
7.268  
7.266  
7.251  
7.247  
7.147  
7.147  
7.129  
7.117  
7.108  
7.104  
7.093  
7.079  
7.064  
7.062  
7.046  
7.044  
7.027  
7.025  
6.793  
6.774  
6.757  
6.717  
6.332  
6.293  
3.873  
3.861  
3.852  
3.839  
3.830  
3.818  
3.533  
3.511  
3.508  
3.487  
3.466  
3.023  
3.001  
2.998  
2.983  
2.976  
2.961  
2.958  
2.936  
2.845  
2.833  
2.824  
2.812  
2.805  
2.793  
2.784  
2.772  
2.280  
2.046

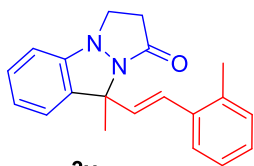

$^1\text{H NMR}$  (400 MHz,  $\text{CDCl}_3$ )

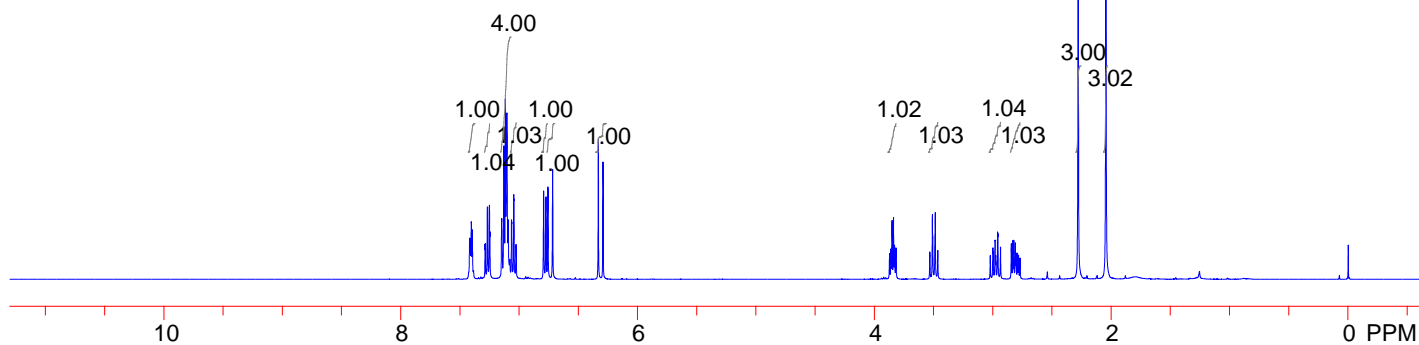

164.616  
147.181  
135.757  
135.479  
135.070  
131.691  
130.258  
128.911  
127.800  
127.363  
126.130  
126.109  
122.917  
122.676  
110.027  
77.478  
77.160  
76.842  
66.418  
51.246  
35.434  
24.632  
19.808

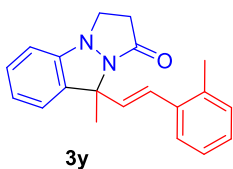

$^{13}\text{C}\{^1\text{H}\}$  NMR (100 MHz,  $\text{CDCl}_3$ )

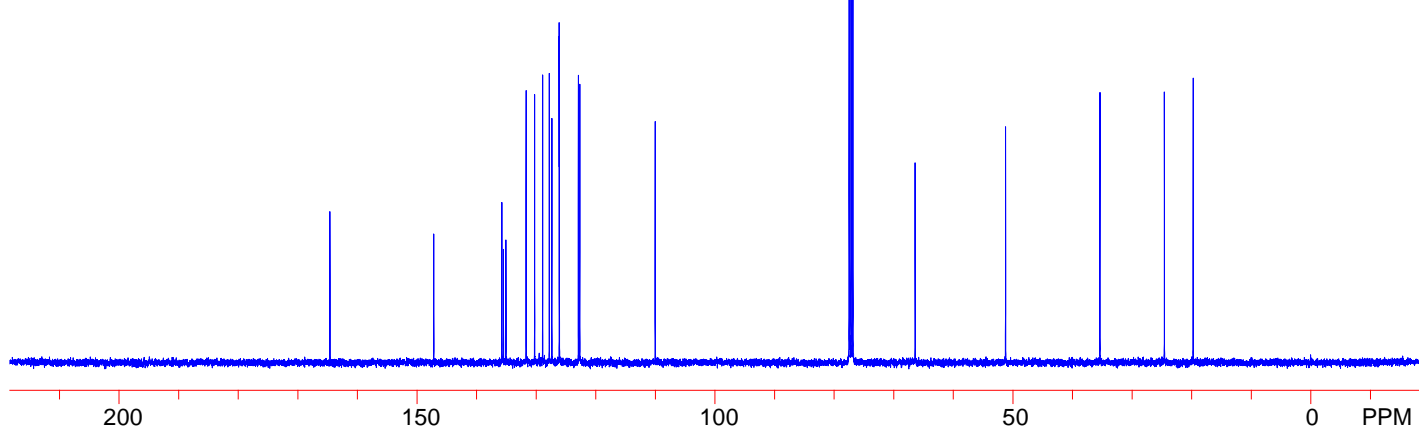

7.537  
7.531  
7.518  
7.513  
7.320  
7.316  
7.313  
7.301  
7.296  
7.277  
7.275  
7.259  
7.256  
7.196  
7.192  
7.178  
7.173  
7.165  
7.161  
7.159  
7.155  
7.146  
7.141  
7.128  
7.123  
7.075  
7.073  
7.056  
7.054  
7.038  
7.035  
6.948  
6.908  
6.801  
6.781  
6.484  
6.444  
3.853  
3.839  
3.831  
3.818  
3.810  
3.797  
3.575  
3.553  
3.530  
3.509  
3.014  
2.991  
2.974  
2.969  
2.951  
2.929  
2.866  
2.852  
2.844  
2.831  
2.826  
2.812  
2.804  
2.791  
2.044

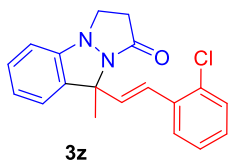

$^1\text{H NMR}$  (400 MHz,  $\text{CDCl}_3$ )

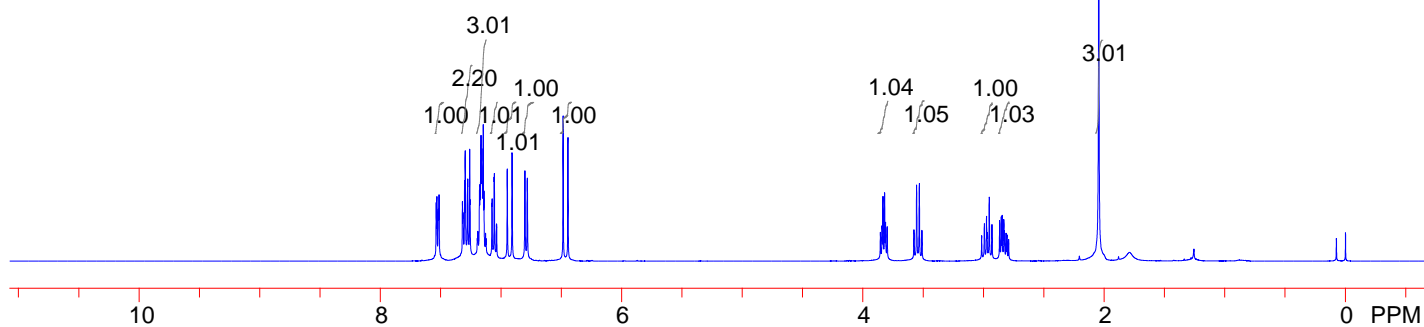

164.627  
147.163  
134.512  
133.381  
132.969  
129.594  
128.968  
128.869  
127.272  
126.825  
125.813  
122.930  
122.777  
109.978  
77.393  
77.075  
76.757  
66.151  
51.201  
35.301  
24.416

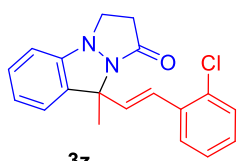

$^{13}\text{C}\{^1\text{H}\}$  NMR (100 MHz,  $\text{CDCl}_3$ )

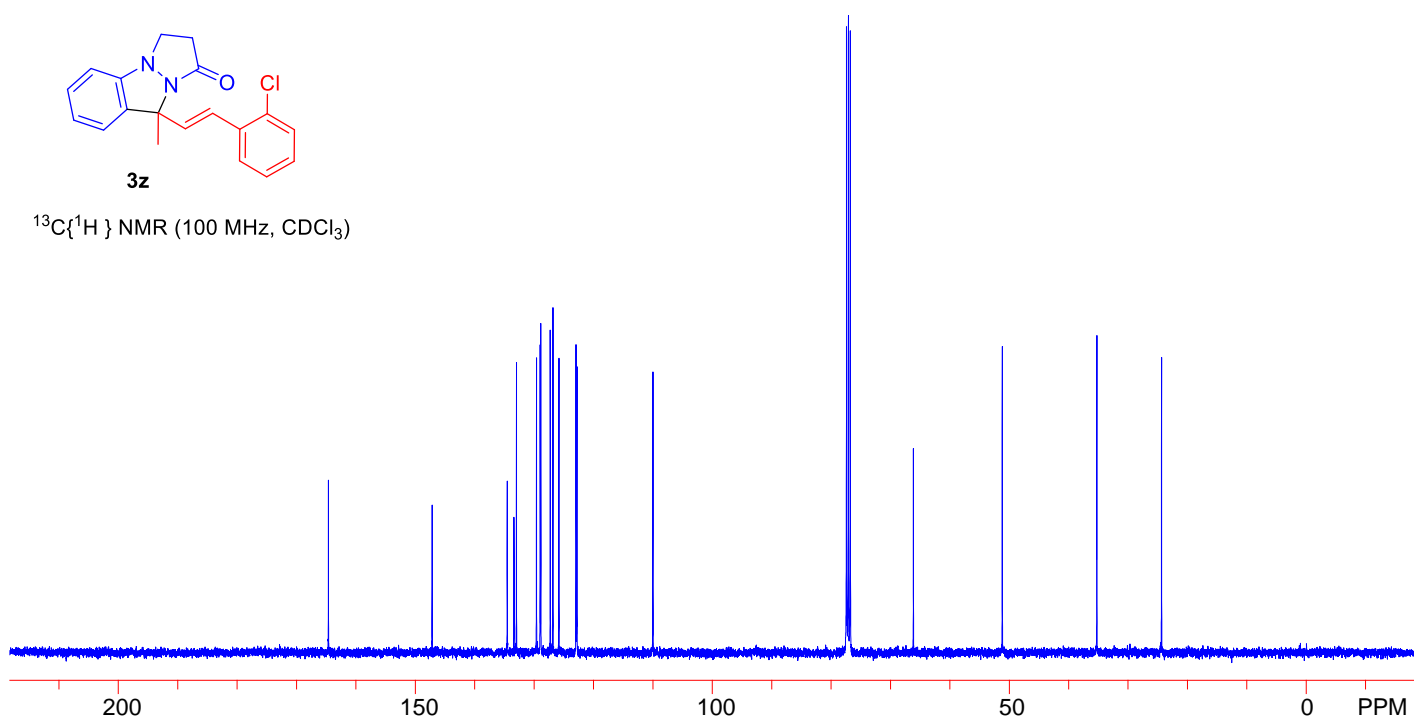

8.021  
8.007  
7.830  
7.817  
7.815  
7.763  
7.749  
7.589  
7.577  
7.511  
7.509  
7.499  
7.497  
7.486  
7.482  
7.479  
7.468  
7.457  
7.420  
7.415  
7.407  
7.394  
7.313  
7.303  
7.287  
7.260  
7.230  
7.218  
7.106  
7.093  
7.081  
6.827  
6.814  
6.488  
6.462  
3.906  
3.898  
3.892  
3.884  
3.878  
3.870  
3.556  
3.541  
3.525  
3.511  
3.062  
3.047  
3.046  
3.035  
3.031  
3.019  
3.004  
2.876  
2.862  
2.853  
2.849  
2.841  
2.835  
2.827  
2.129

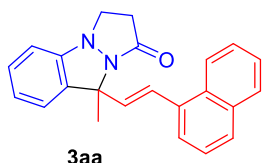

$^1\text{H NMR}$  (600 MHz,  $\text{CDCl}_3$ )

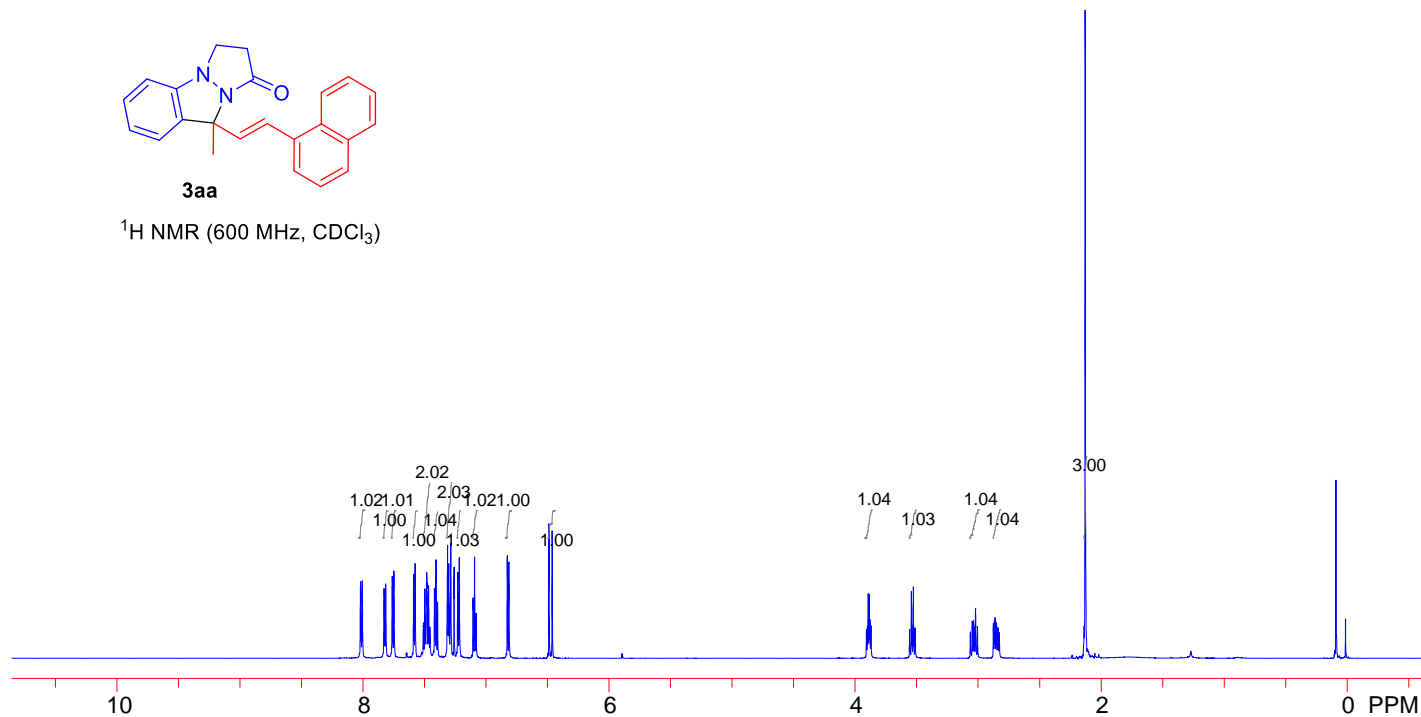

164.798  
135.048  
134.159  
133.652  
147.251  
133.584  
131.331  
129.007  
128.578  
128.261  
126.846  
126.200  
125.870  
125.656  
124.426  
123.920  
123.041  
122.697  
110.120  
77.371  
77.160  
76.949  
66.535  
51.325  
35.465  
24.763

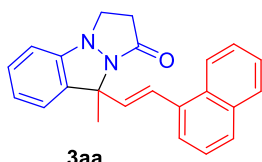

$^{13}\text{C}\{^1\text{H}\}$  NMR (150 MHz,  $\text{CDCl}_3$ )

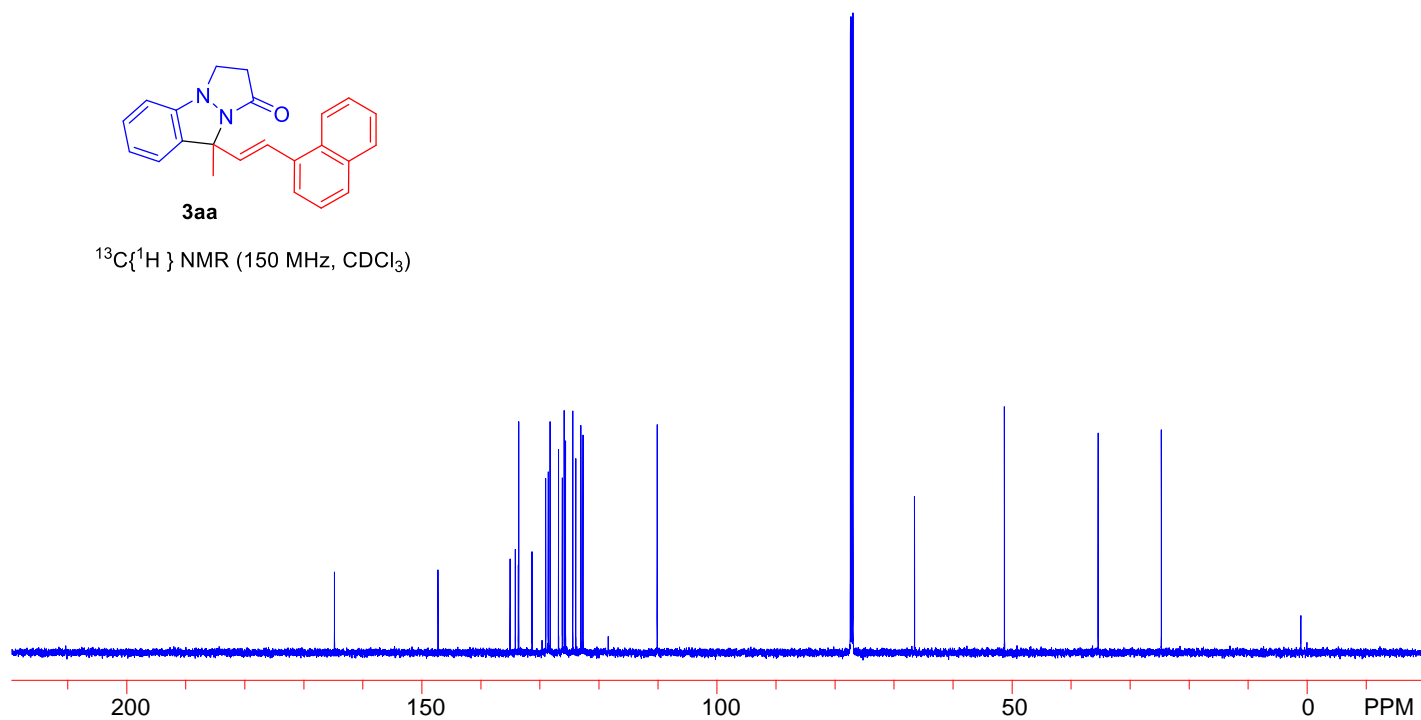

7.265  
7.259  
7.256  
7.238  
7.221  
7.218  
7.070  
7.053  
7.033  
7.015  
6.997  
6.762  
6.742  
5.752  
5.748  
5.713  
5.710  
5.668  
5.653  
5.637  
5.622  
5.615  
5.599  
3.859  
3.847  
3.837  
3.826  
3.816  
3.804  
3.468  
3.448  
3.443  
3.426  
3.422  
3.401  
3.005  
2.983  
2.979  
2.965  
2.957  
2.943  
2.939  
2.917  
2.803  
2.792  
2.782  
2.771  
2.763  
2.752  
2.742  
2.731  
1.923  
1.703  
1.700  
1.687  
1.685

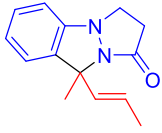

**3bb**

$^1\text{H}$  NMR (400 MHz,  $\text{CDCl}_3$ )

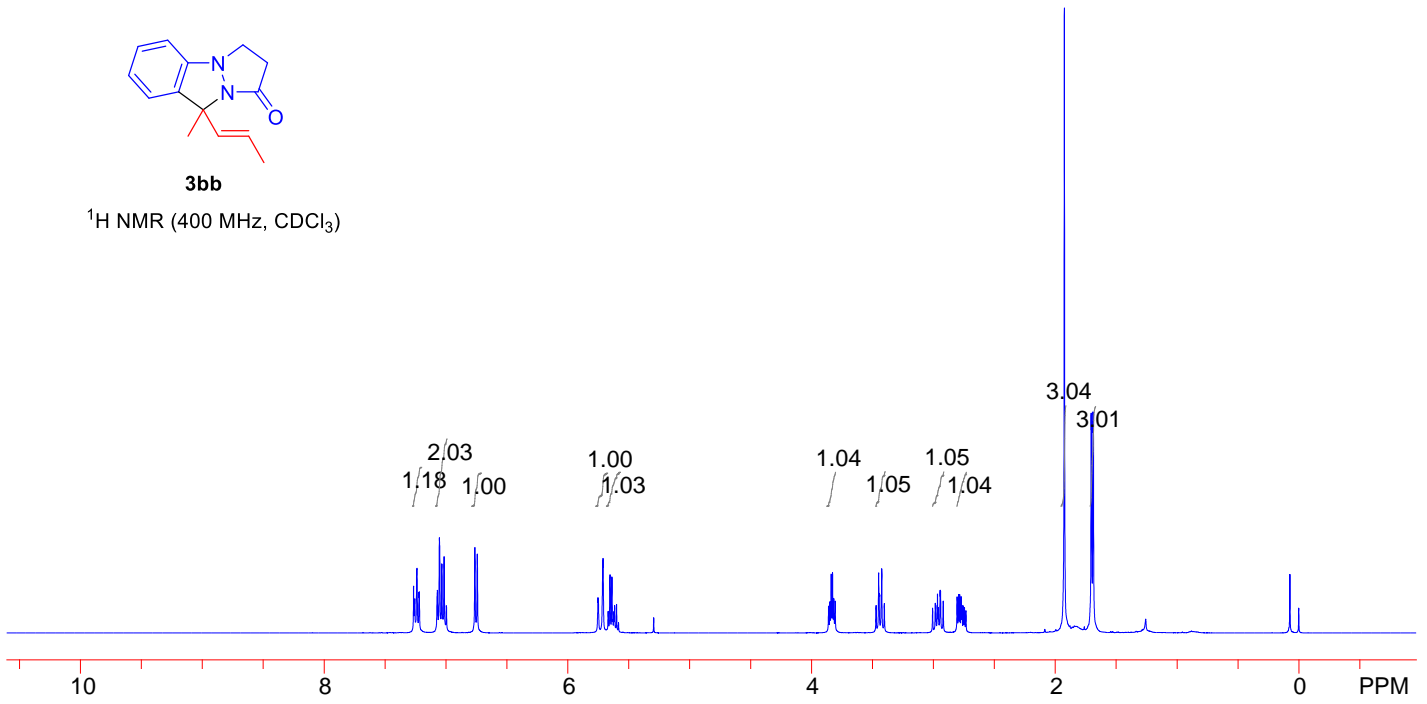

164.321  
146.949  
135.579  
132.093  
128.678  
125.520  
122.814  
122.604  
109.887  
77.372  
77.160  
76.948  
66.097  
51.156  
35.488  
24.535  
17.595

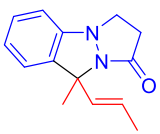

**3bb**

$^{13}\text{C}\{^1\text{H}\}$  NMR (150 MHz,  $\text{CDCl}_3$ )

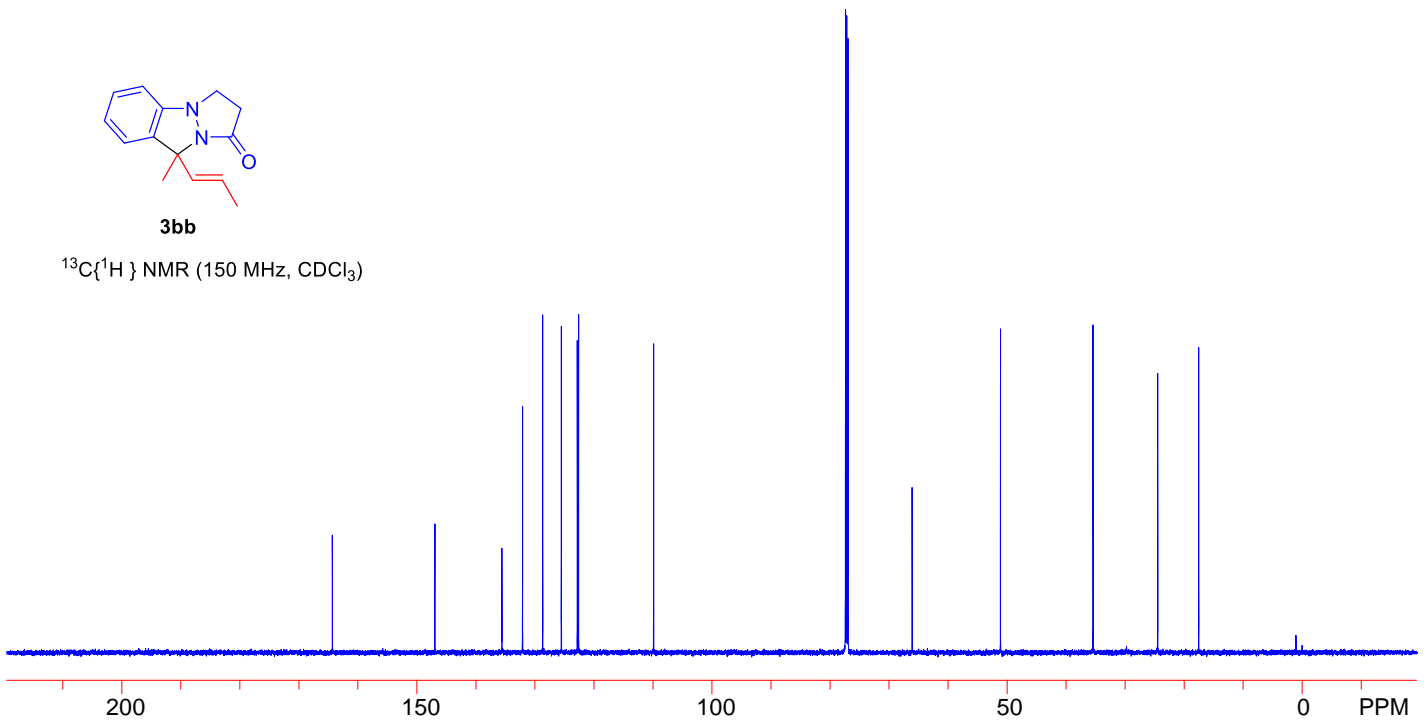

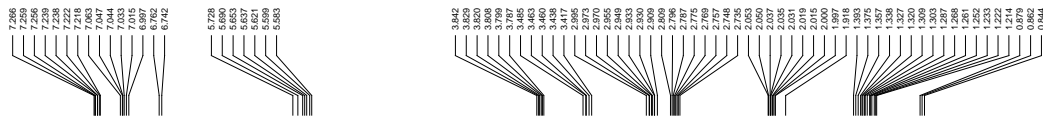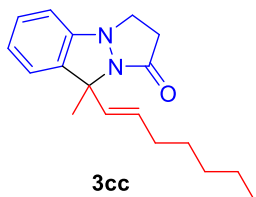

$^1\text{H}$  NMR (400 MHz,  $\text{CDCl}_3$ )

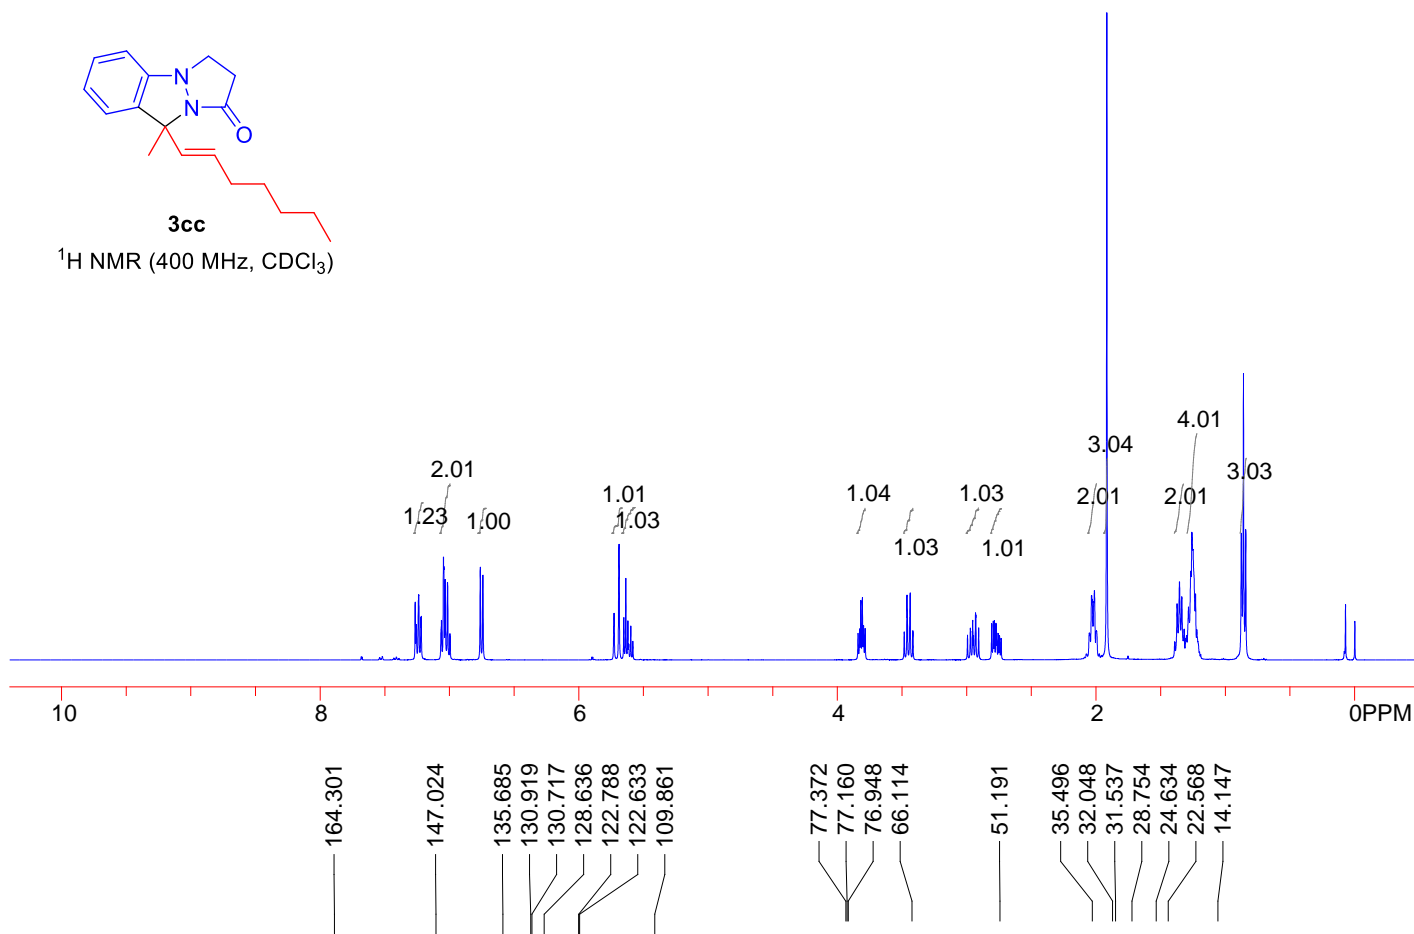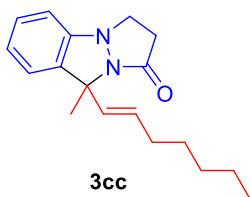

$^{13}\text{C}\{^1\text{H}\}$  NMR (150 MHz,  $\text{CDCl}_3$ )

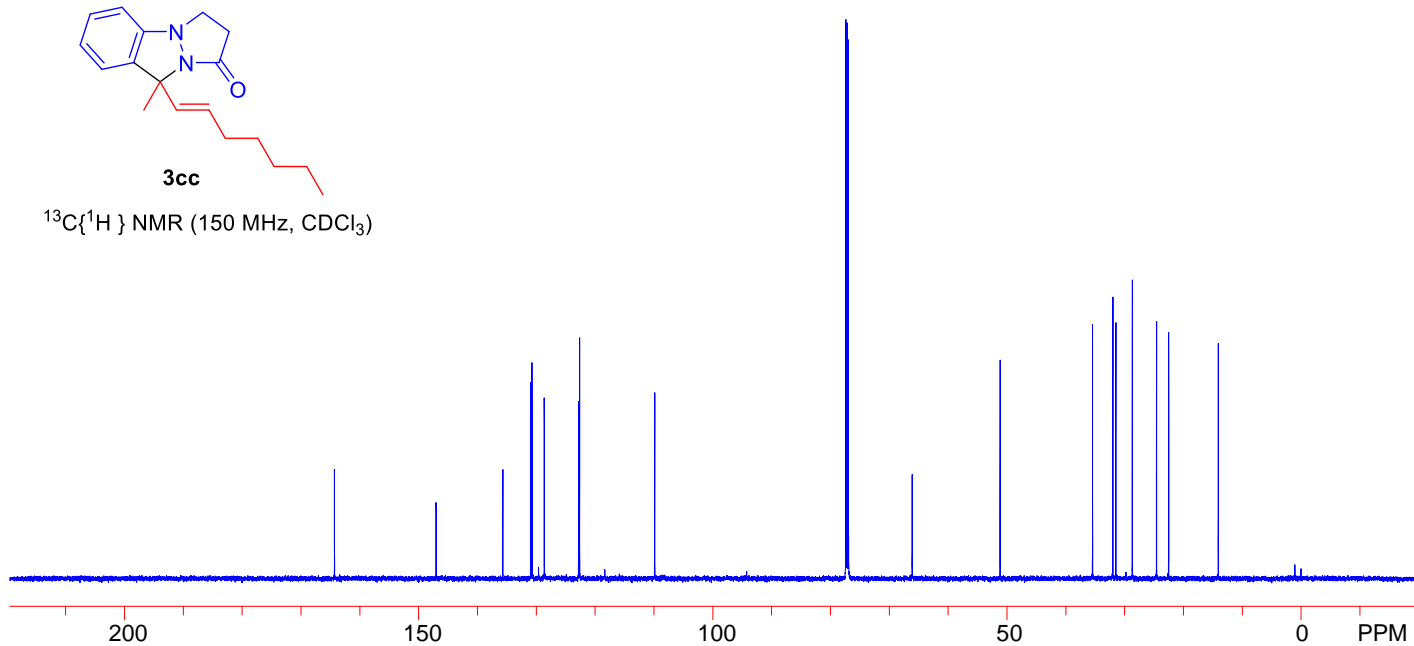

7.291  
7.278  
7.266  
7.260  
7.256  
7.254  
7.243  
7.241  
7.230  
7.228  
7.203  
7.191  
7.179  
7.165  
7.154  
7.056  
7.055  
7.044  
7.023  
7.022  
7.011  
7.010  
6.998  
6.997  
6.762  
6.749  
5.841  
5.815  
5.808  
5.799  
5.783  
5.773  
3.812  
3.803  
3.798  
3.789  
3.783  
3.775  
3.504  
3.490  
3.474  
3.460  
3.433  
3.423  
3.406  
3.398  
3.389  
3.372  
3.364  
2.970  
2.956  
2.944  
2.940  
2.929  
2.928  
2.913  
2.815  
2.806  
2.801  
2.792  
2.789  
2.780  
2.774  
2.766  
1.930

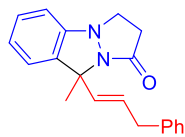

**3dd**

$^1\text{H}$  NMR (600 MHz,  $\text{CDCl}_3$ )

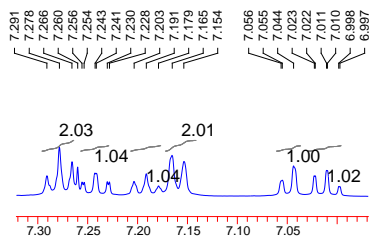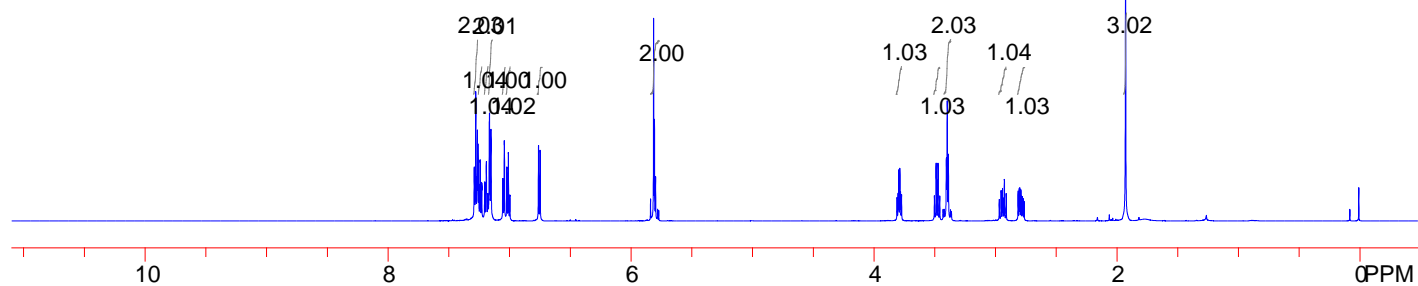

164.401  
147.057  
139.901  
135.381  
132.477  
129.229  
128.736  
128.536  
126.231  
122.857  
122.643  
109.899  
77.371  
77.160  
76.949  
65.992  
51.197  
38.415  
35.442  
24.562

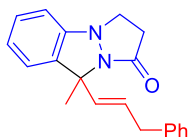

**3dd**

$^{13}\text{C}\{^1\text{H}\}$  NMR (150 MHz,  $\text{CDCl}_3$ )

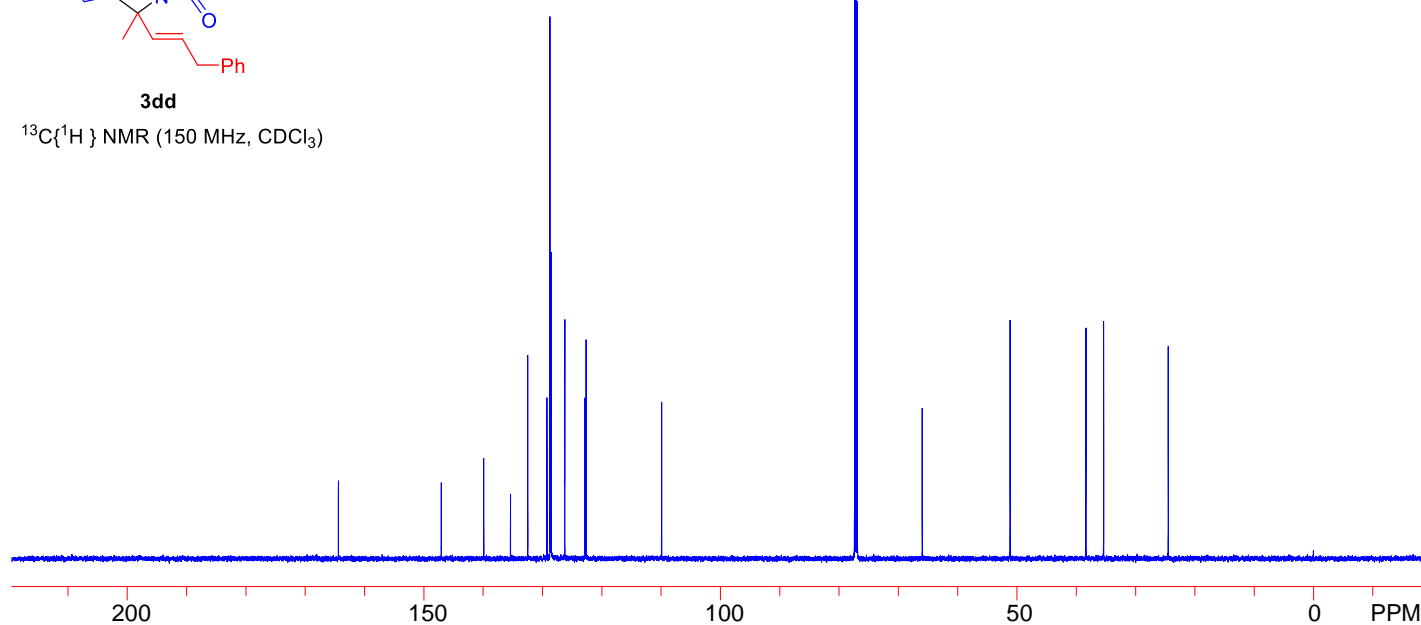

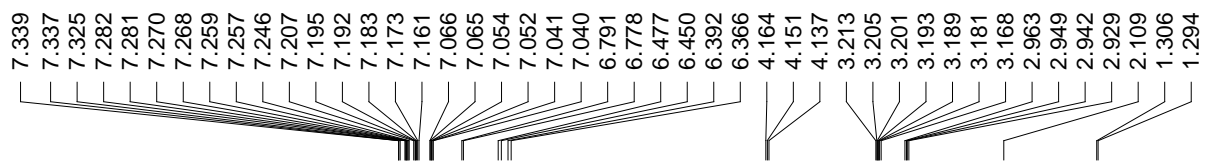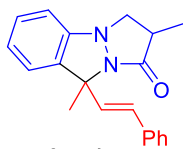

$^1\text{H}$  NMR (600 MHz,  $\text{CDCl}_3$ )

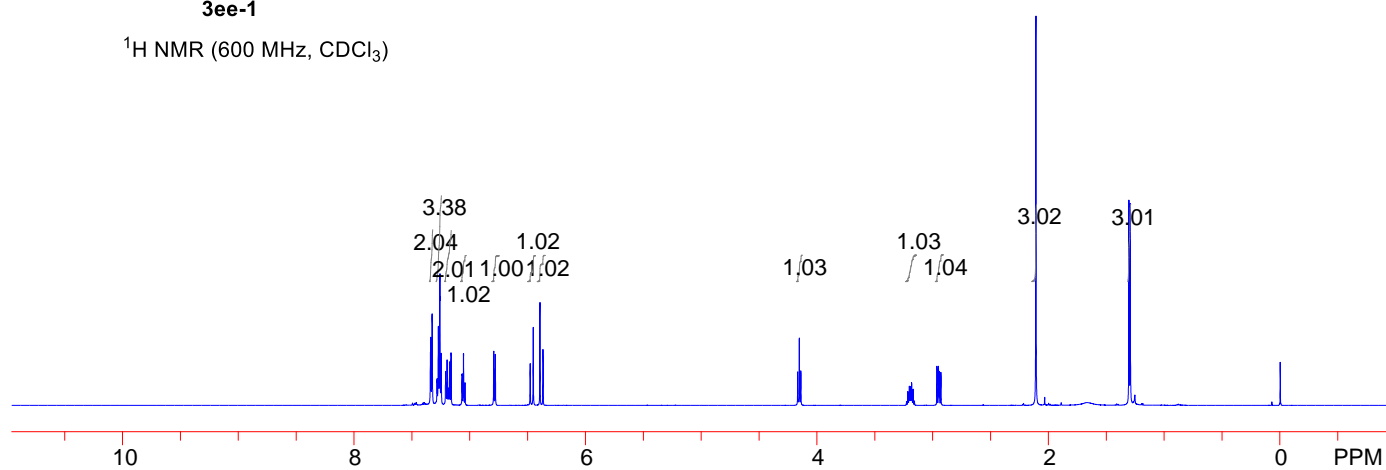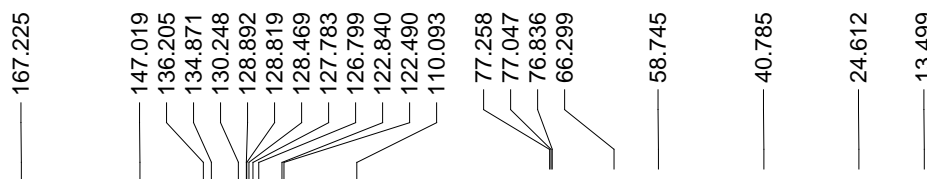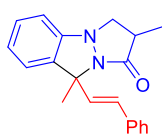

$^{13}\text{C}\{^1\text{H}\}$  NMR (150 MHz,  $\text{CDCl}_3$ )

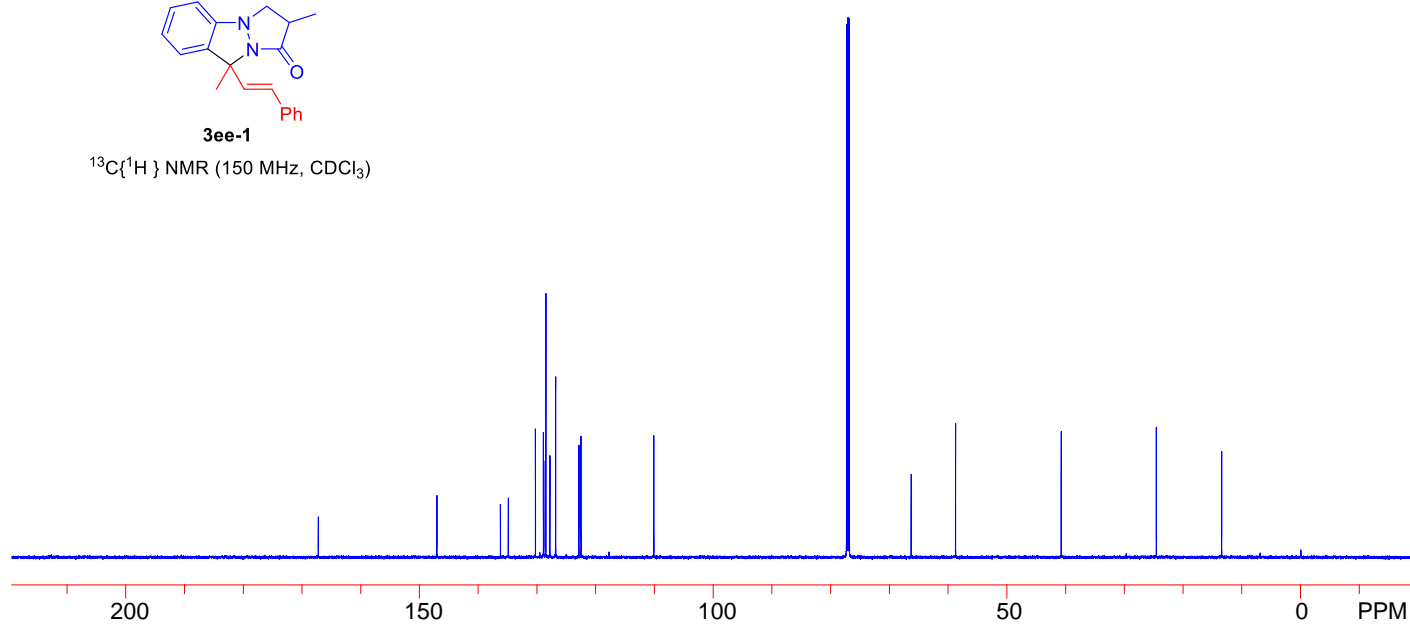



7.384  
7.366  
7.299  
7.281  
7.260  
7.244  
7.241  
7.231  
7.213  
7.195  
7.119  
7.101  
7.042  
7.023  
7.005  
6.788  
6.768  
6.576  
6.536  
6.512  
6.472  
3.850  
3.830  
3.809  
3.330  
3.311  
3.290  
3.076  
3.058  
3.039  
3.020  
3.002  
2.983  
1.958  
1.382  
1.364

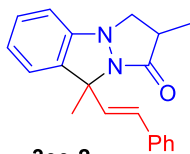

$^1\text{H}$  NMR (400 MHz,  $\text{CDCl}_3$ )

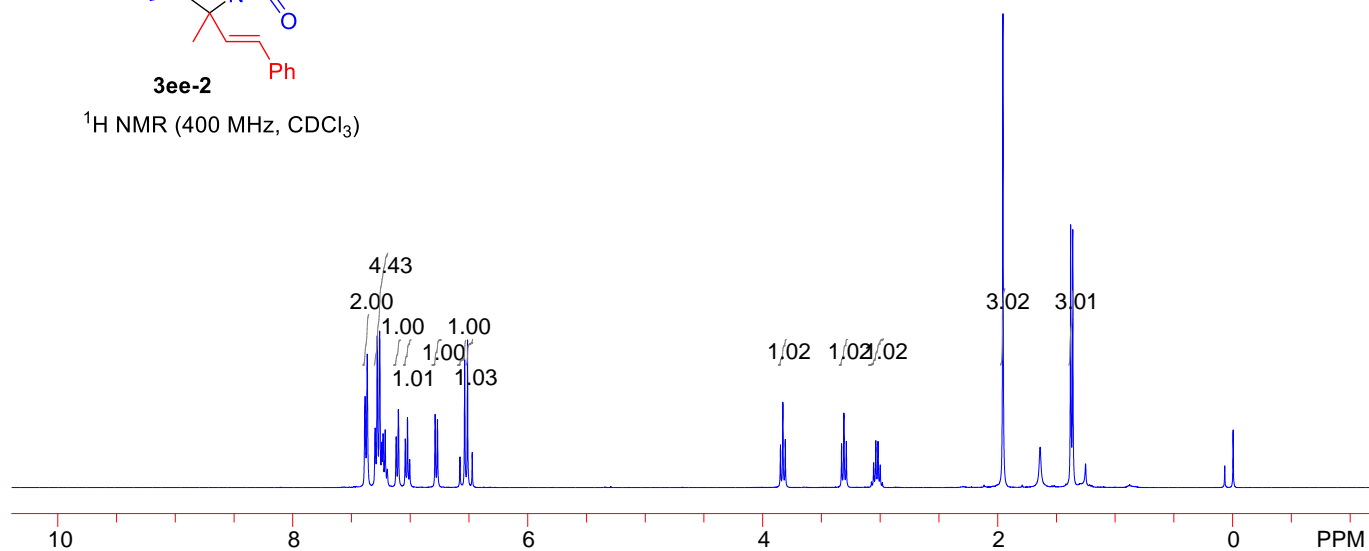

167.662  
147.172  
136.344  
134.951  
130.489  
129.512  
128.782  
128.491  
127.827  
126.894  
122.781  
122.694  
109.853  
77.251  
77.040  
76.828  
65.934  
58.088  
41.266  
24.393  
14.593

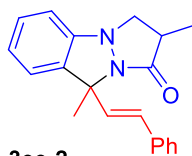

$^{13}\text{C}\{^1\text{H}\}$  NMR (150 MHz,  $\text{CDCl}_3$ )

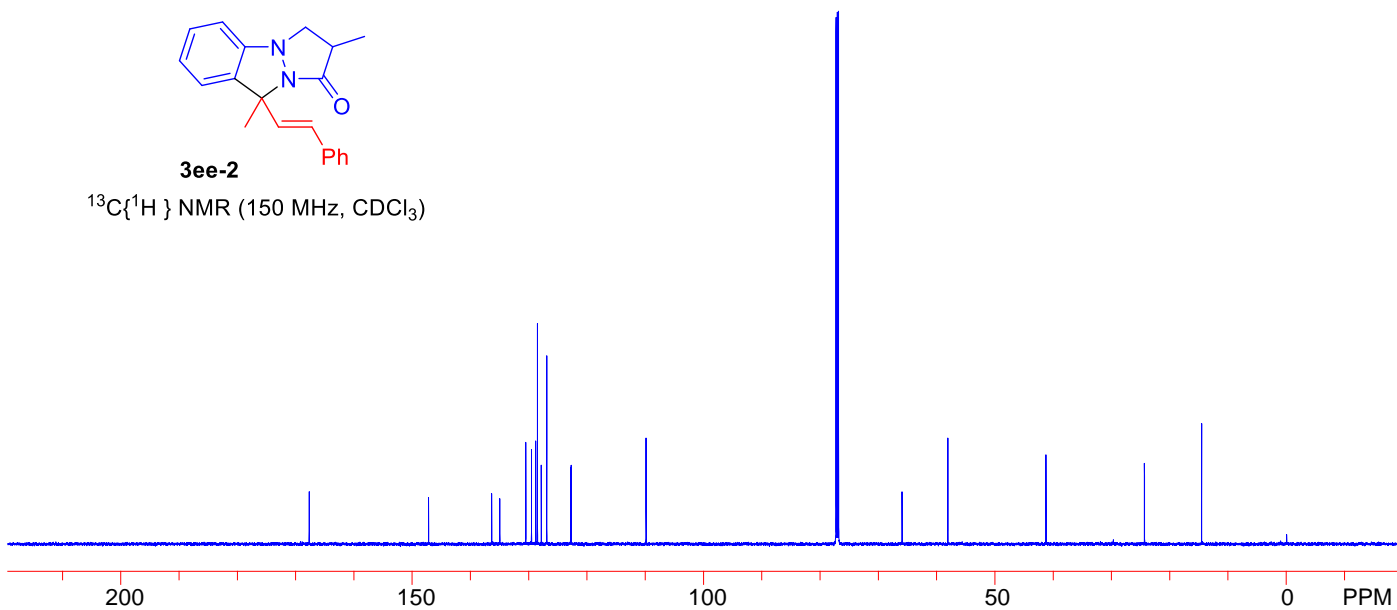

## VI. NMR spectra of 4a-4t

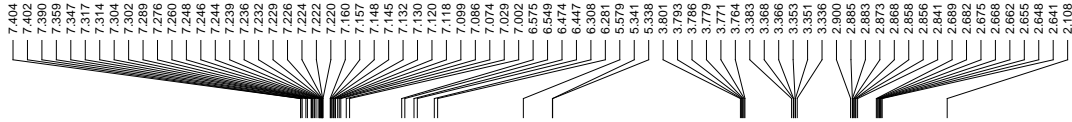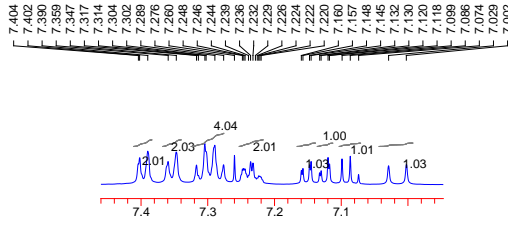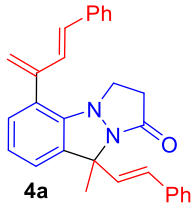

$^1\text{H}$  NMR (600 MHz,  $\text{CDCl}_3$ )

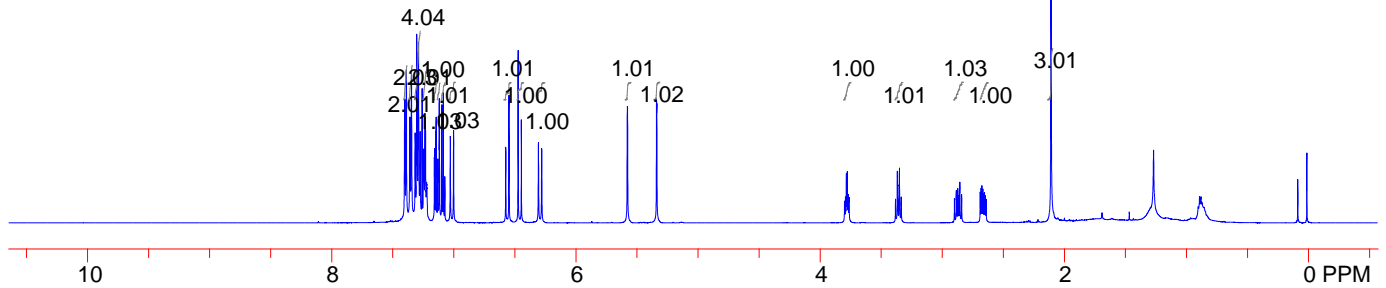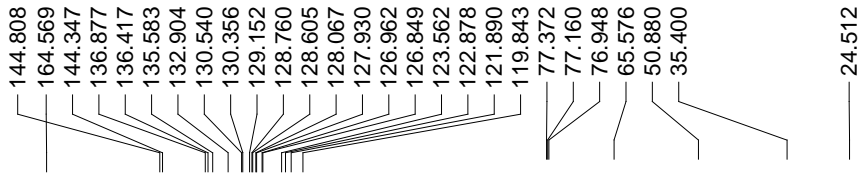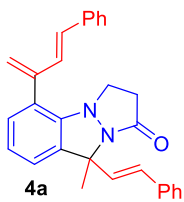

$^{13}\text{C}\{^1\text{H}\}$  NMR (150 MHz,  $\text{CDCl}_3$ )

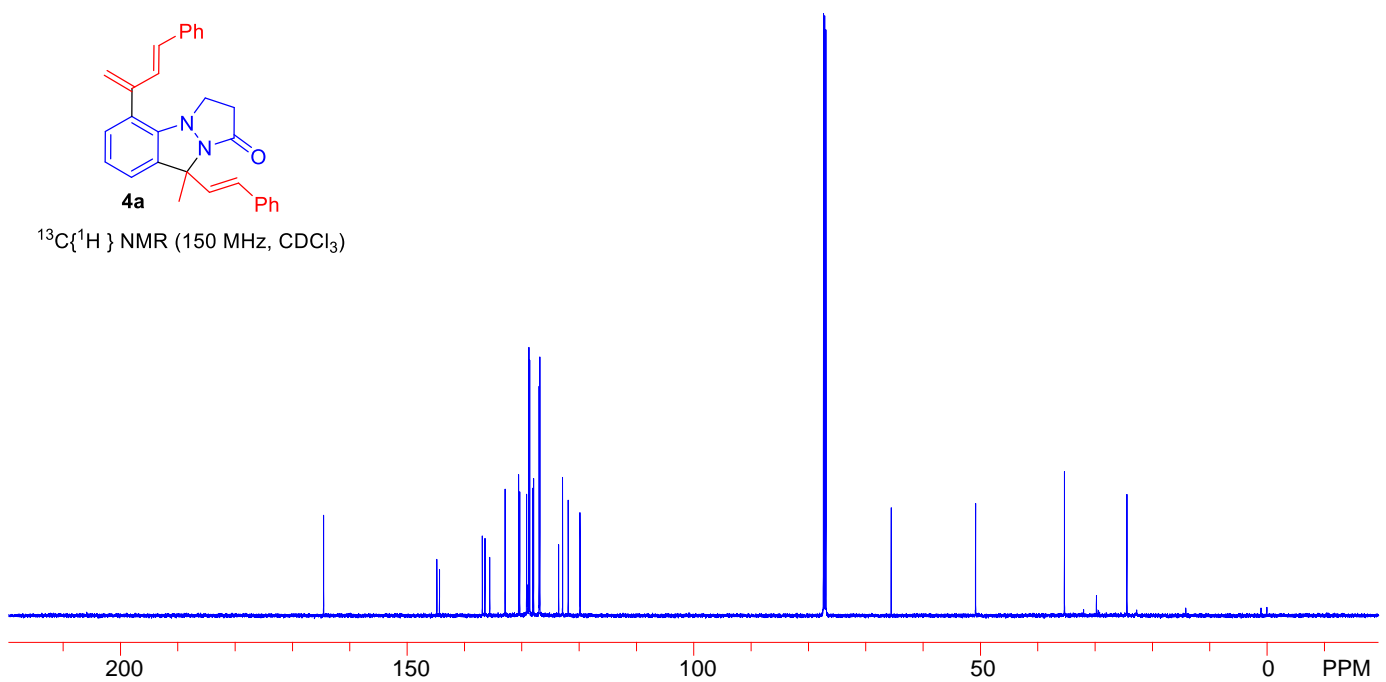

7.414  
7.396  
7.370  
7.352  
7.325  
7.308  
7.292  
7.273  
7.260  
7.253  
7.250  
7.235  
7.217  
7.214  
7.022  
6.982  
6.949  
6.934  
6.599  
6.559  
6.462  
6.422  
6.328  
6.288  
5.559  
5.323  
3.765  
3.754  
3.743  
3.732  
3.722  
3.709  
3.346  
3.324  
3.299  
3.277  
2.899  
2.878  
2.874  
2.859  
2.852  
2.838  
2.834  
2.812  
2.683  
2.672  
2.662  
2.651  
2.643  
2.632  
2.622  
2.611  
2.364  
2.092

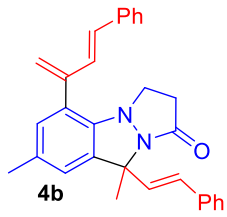

$^1\text{H NMR}$  (400 MHz,  $\text{CDCl}_3$ )

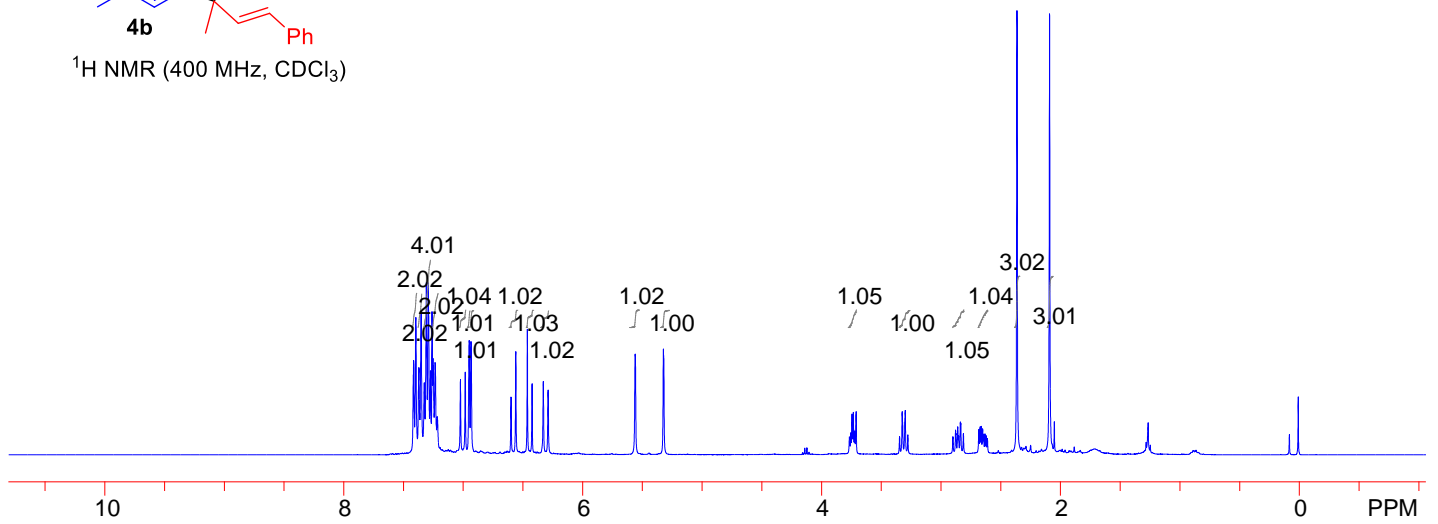

144.936  
164.667  
142.209  
136.943  
136.490  
135.862  
132.857  
132.652  
130.808  
130.664  
129.049  
129.004  
128.751  
128.599  
128.031  
127.890  
126.965  
126.850  
123.457  
122.433  
119.666  
77.478  
77.160  
76.843  
65.571  
51.319  
35.478  
24.464  
21.061

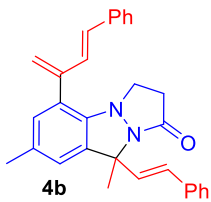

$^{13}\text{C}\{^1\text{H}\}$  NMR (100 MHz,  $\text{CDCl}_3$ )

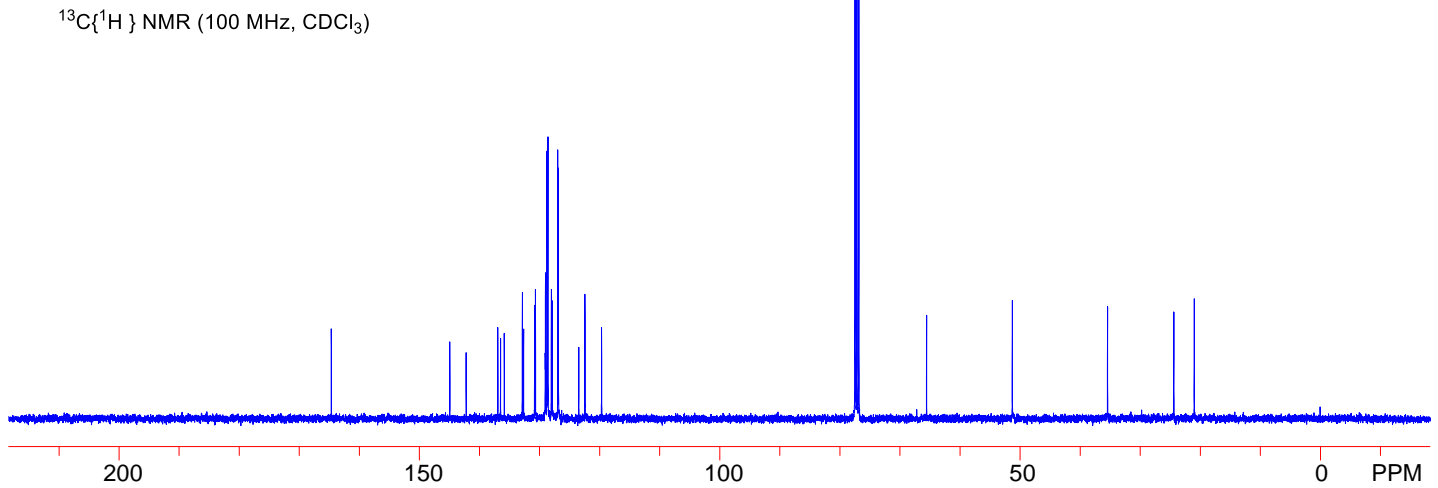

7.415  
7.403  
7.371  
7.358  
7.323  
7.310  
7.295  
7.282  
7.260  
7.251  
7.249  
7.247  
7.239  
7.235  
7.226  
7.225  
7.223  
7.023  
6.996  
6.972  
6.959  
6.959  
6.569  
6.465  
6.438  
6.334  
6.308  
5.569  
5.338  
5.336  
3.771  
3.763  
3.756  
3.749  
3.741  
3.734  
3.345  
3.331  
3.328  
3.313  
3.299  
2.893  
2.878  
2.876  
2.866  
2.861  
2.852  
2.849  
2.834  
2.685  
2.677  
2.672  
2.660  
2.651  
2.647  
2.644  
2.637  
2.630  
2.106  
1.280  
1.267  
1.254

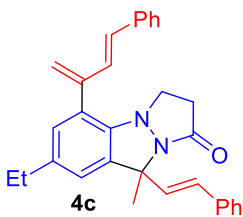

$^1\text{H NMR}$  (600 MHz,  $\text{CDCl}_3$ )

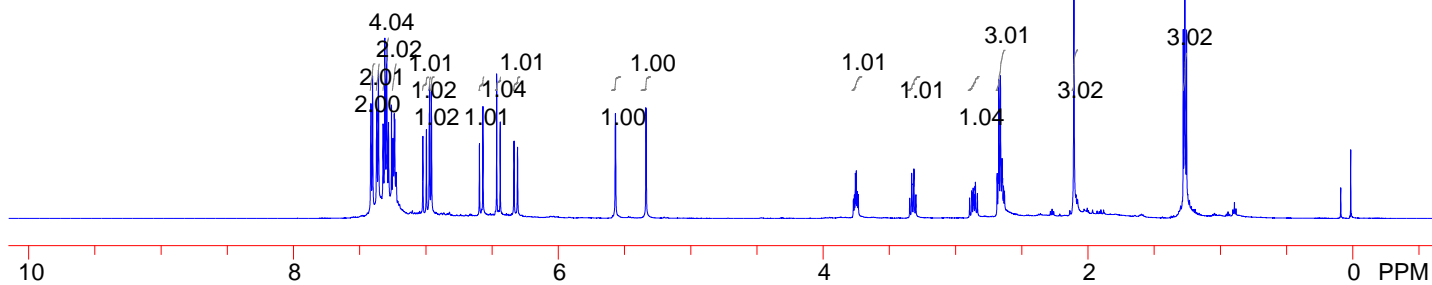

144.933  
164.626  
142.272  
139.135  
136.883  
136.416  
135.726  
132.753  
130.588  
129.624  
128.990  
128.913  
128.674  
128.515  
127.940  
127.809  
126.903  
126.771  
123.368  
121.115  
119.610  
77.297  
77.086  
76.875  
65.570  
51.151  
35.384  
28.428  
24.369  
15.784

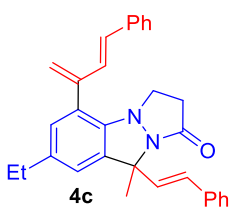

$^{13}\text{C}\{^1\text{H}\}$  NMR (150 MHz,  $\text{CDCl}_3$ )

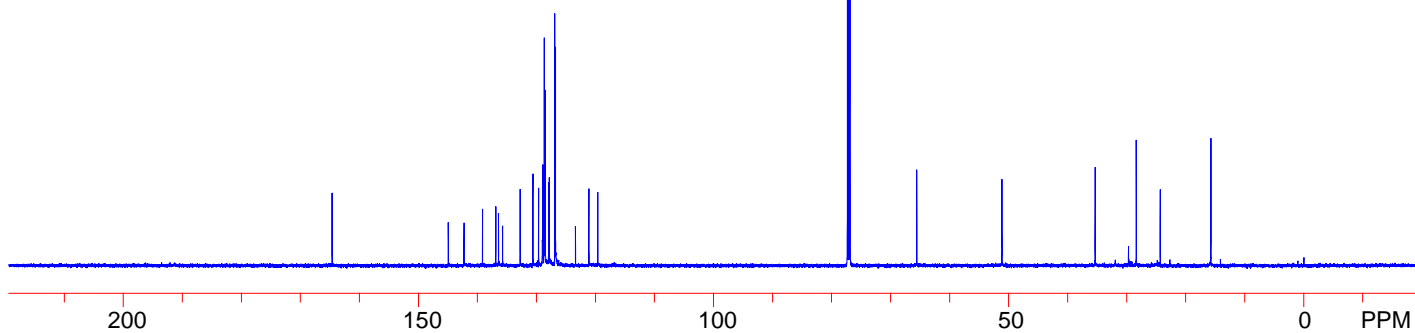

7.410  
7.406  
7.388  
7.388  
7.363  
7.345  
7.316  
7.312  
7.298  
7.282  
7.279  
7.263  
7.240  
7.237  
7.228  
7.222  
7.218  
7.212  
7.204  
7.200  
7.129  
7.023  
6.983  
6.588  
6.548  
6.461  
6.422  
6.338  
6.298  
5.564  
5.338  
5.334  
3.786  
3.776  
3.764  
3.754  
3.743  
3.732  
3.339  
3.317  
3.313  
3.295  
3.291  
3.269  
2.903  
2.881  
2.876  
2.863  
2.855  
2.841  
2.836  
2.815  
2.667  
2.657  
2.646  
2.636  
2.627  
2.617  
2.606  
2.596  
2.111  
1.333

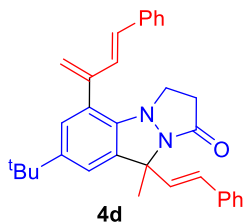

$^1\text{H NMR}$  (400 MHz,  $\text{CDCl}_3$ )

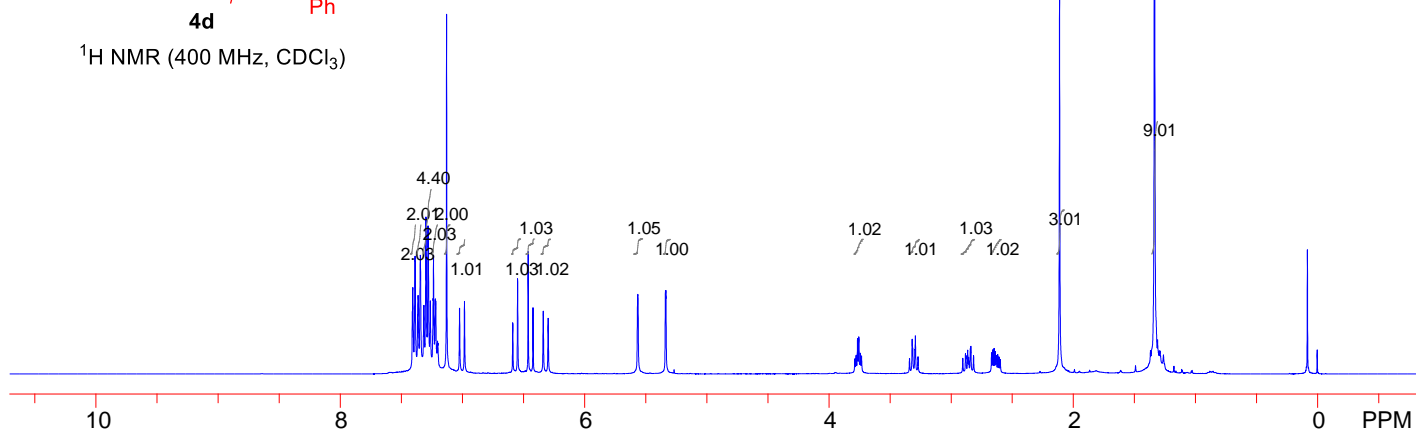

163.569  
145.193  
144.080  
140.925  
135.859  
135.395  
134.280  
131.670  
129.606  
128.026  
127.829  
127.615  
127.464  
126.878  
126.734  
126.247  
125.854  
125.696  
121.789  
118.577  
117.451  
76.349  
76.032  
75.714  
64.674  
49.941  
34.313  
33.578  
30.576  
23.352

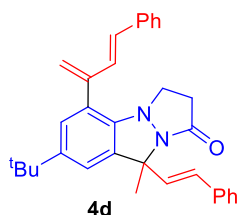

$^{13}\text{C}\{^1\text{H}\}$  NMR (100 MHz,  $\text{CDCl}_3$ )

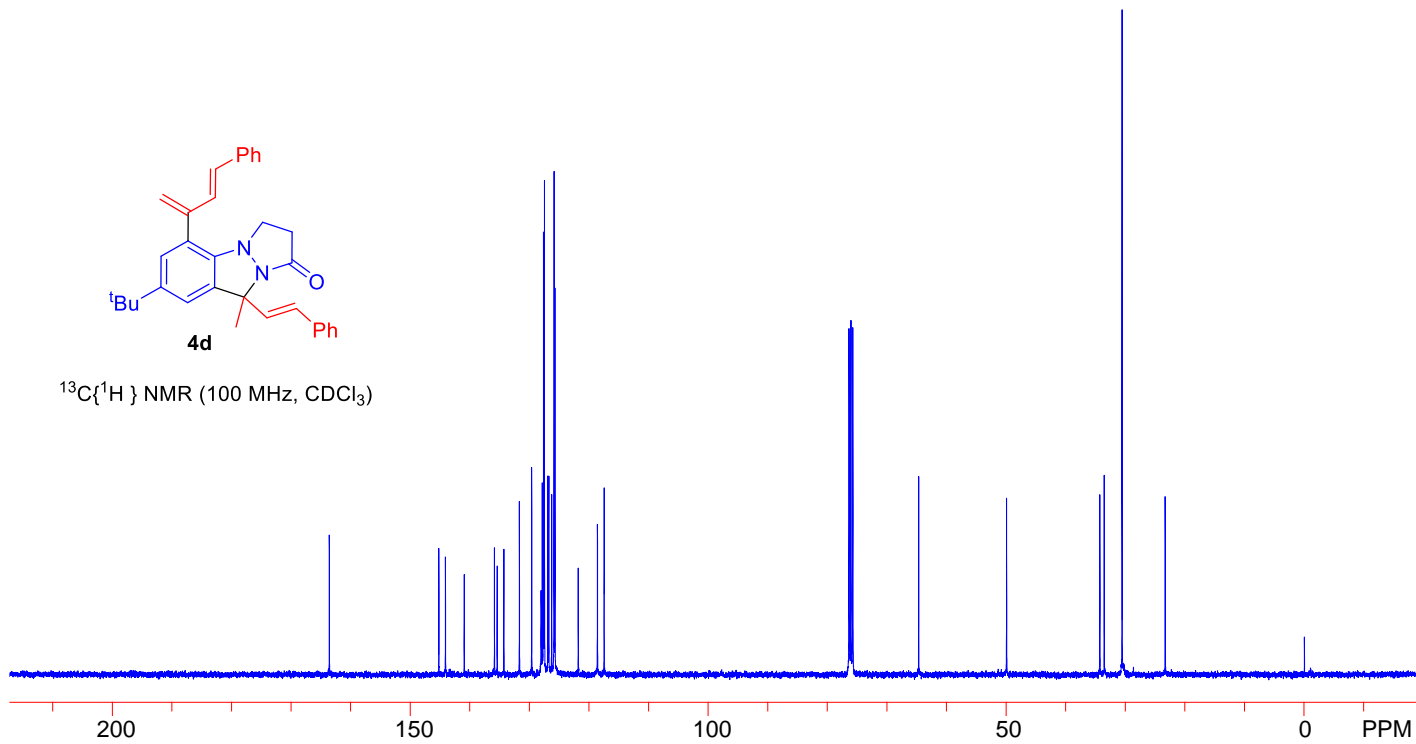

7.406  
7.402  
7.384  
7.365  
7.361  
7.343  
7.326  
7.322  
7.309  
7.294  
7.290  
7.275  
7.257  
7.248  
7.242  
7.239  
7.231  
7.227  
7.224  
7.221  
7.221  
6.997  
6.957  
6.881  
6.874  
6.870  
6.862  
6.855  
6.847  
6.841  
6.584  
6.545  
6.435  
6.395  
6.315  
6.275  
5.582  
5.342  
5.340  
3.760  
3.749  
3.739  
3.727  
3.717  
3.705  
3.703  
3.343  
3.322  
3.318  
3.300  
3.296  
3.274  
2.890  
2.869  
2.865  
2.850  
2.843  
2.829  
2.825  
2.803  
2.682  
2.671  
2.661  
2.650  
2.642  
2.630  
2.621  
2.610  
2.082

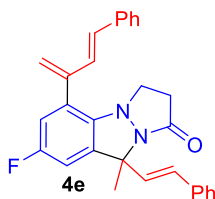

$^1\text{H}$  NMR (400 MHz,  $\text{CDCl}_3$ )

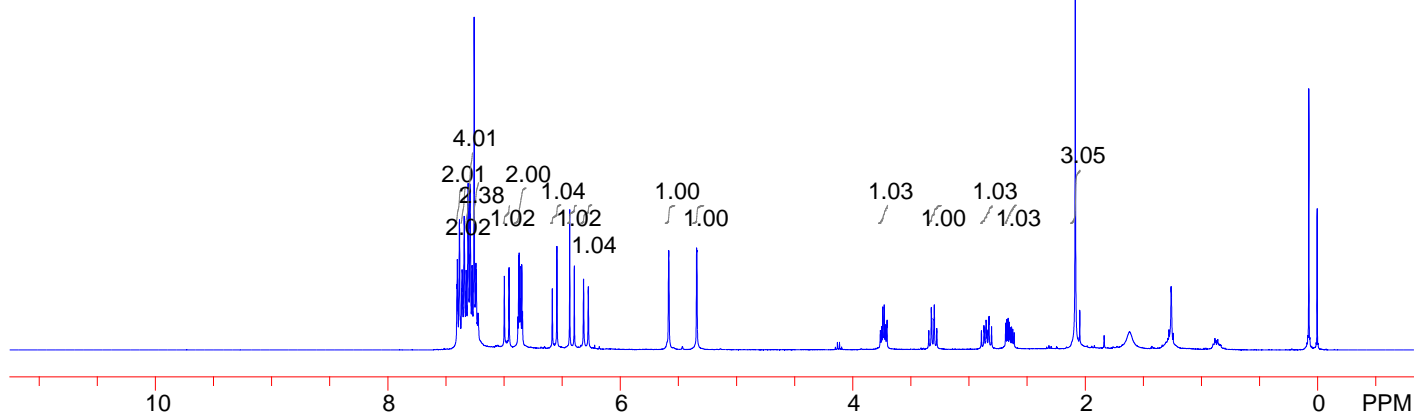

164.647  
160.268  
157.774  
143.727  
140.595  
137.179  
137.100  
136.556  
136.098  
133.047  
129.857  
129.478  
128.710  
128.563  
128.330  
128.154  
128.009  
126.905  
126.787  
124.726  
124.653  
120.056  
116.930  
116.688  
109.361  
109.116  
77.359  
77.041  
76.722  
65.610  
65.588  
51.215  
35.227  
24.283

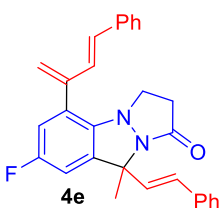

$^{13}\text{C}\{^1\text{H}\}$  NMR (100 MHz,  $\text{CDCl}_3$ )

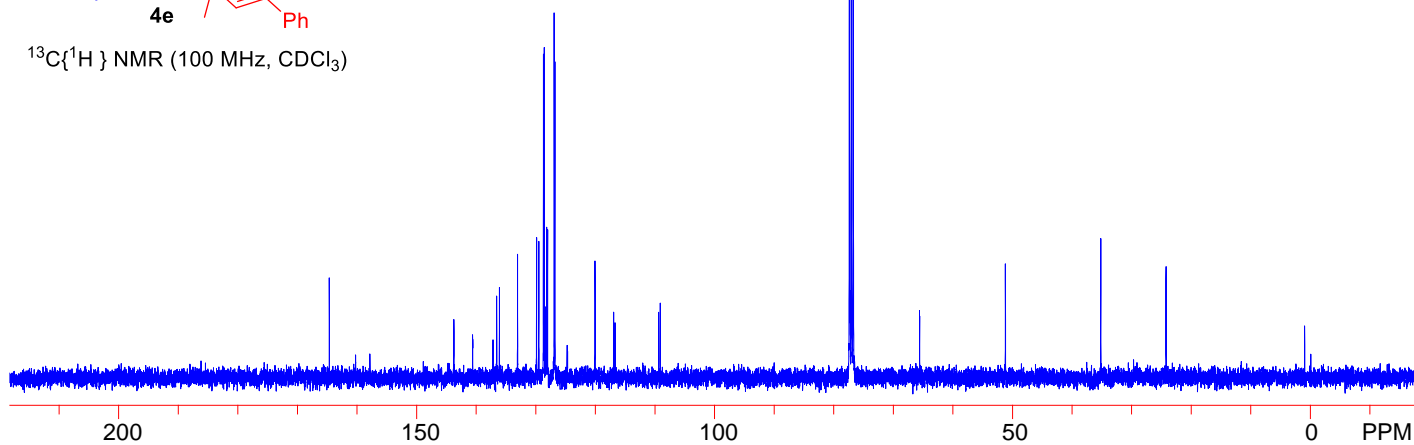

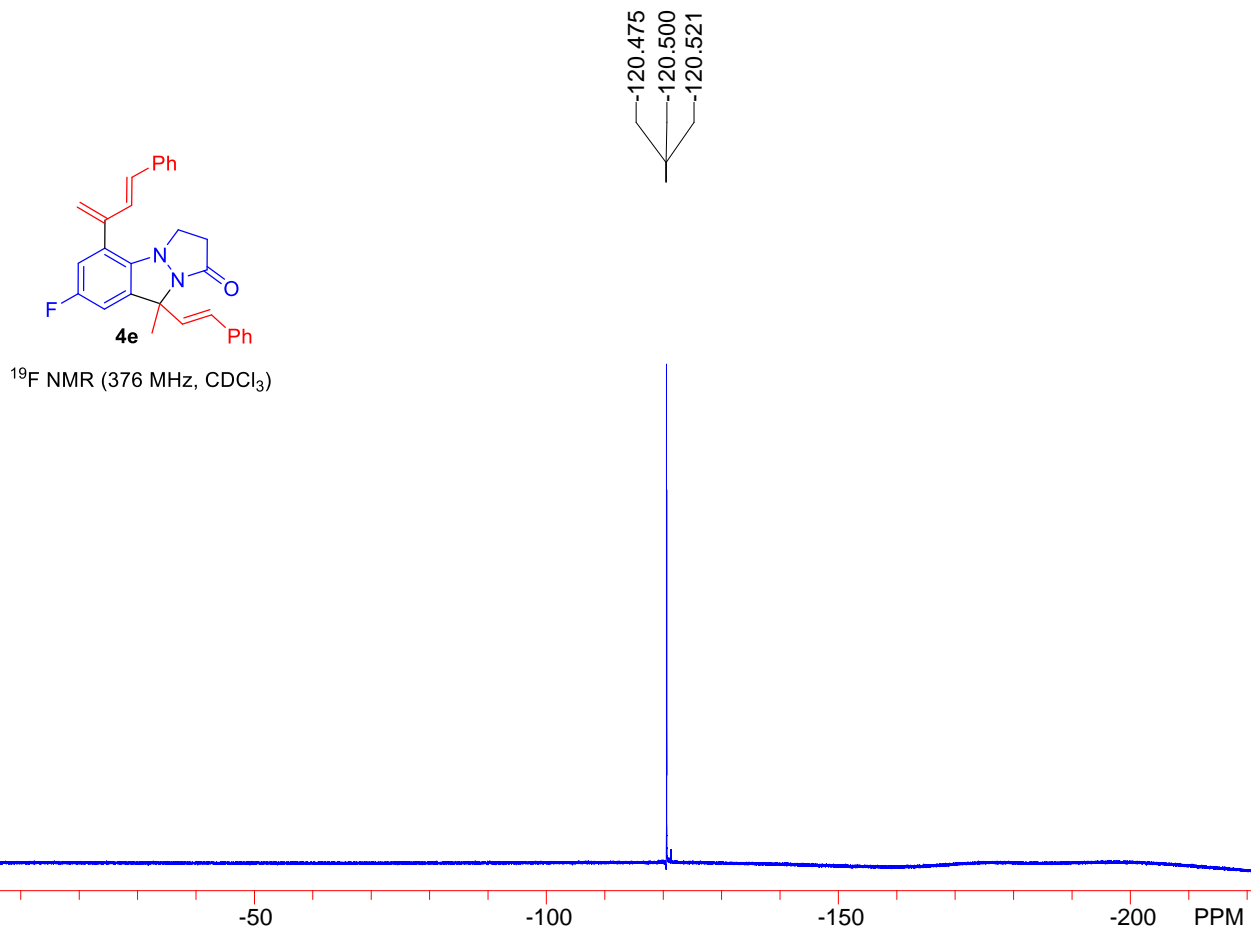

7.407  
7.403  
7.385  
7.359  
7.355  
7.337  
7.327  
7.325  
7.320  
7.307  
7.288  
7.269  
7.261  
7.258  
7.254  
7.247  
7.240  
7.233  
7.225  
7.222  
7.219  
7.215  
7.102  
6.990  
6.949  
6.586  
6.546  
6.422  
6.382  
6.290  
6.250  
5.577  
5.327  
3.761  
3.749  
3.739  
3.727  
3.716  
3.705  
3.370  
3.348  
3.323  
3.301  
2.891  
2.869  
2.866  
2.851  
2.844  
2.829  
2.825  
2.804  
2.690  
2.678  
2.669  
2.657  
2.649  
2.638  
2.628  
2.617  
2.077

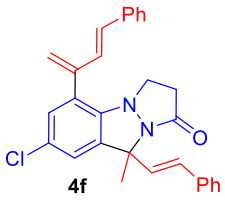

$^1\text{H NMR}$  (400 MHz,  $\text{CDCl}_3$ )

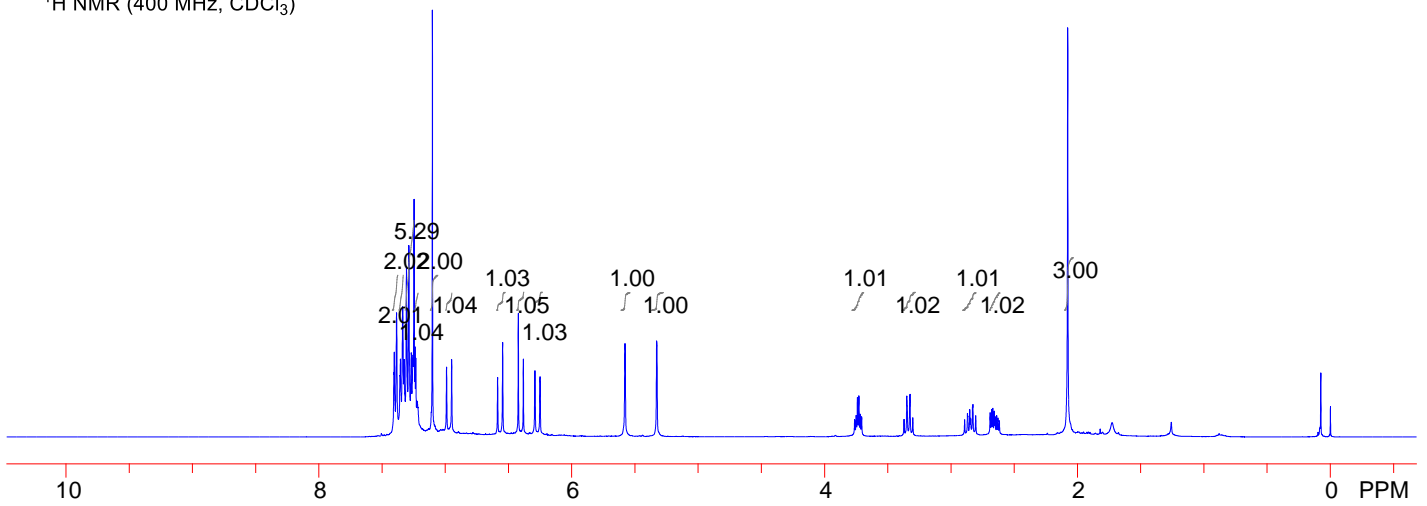

143.634  
164.444  
142.950  
137.284  
136.529  
136.067  
133.133  
129.961  
129.786  
129.512  
128.731  
128.591  
128.192  
128.055  
127.820  
126.927  
126.818  
124.713  
122.010  
120.182  
77.303  
77.092  
76.880  
65.512  
50.705  
35.201  
24.305

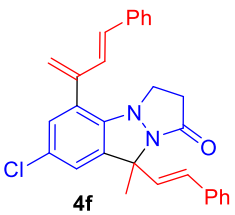

$^{13}\text{C}\{^1\text{H}\}$  NMR (150 MHz,  $\text{CDCl}_3$ )

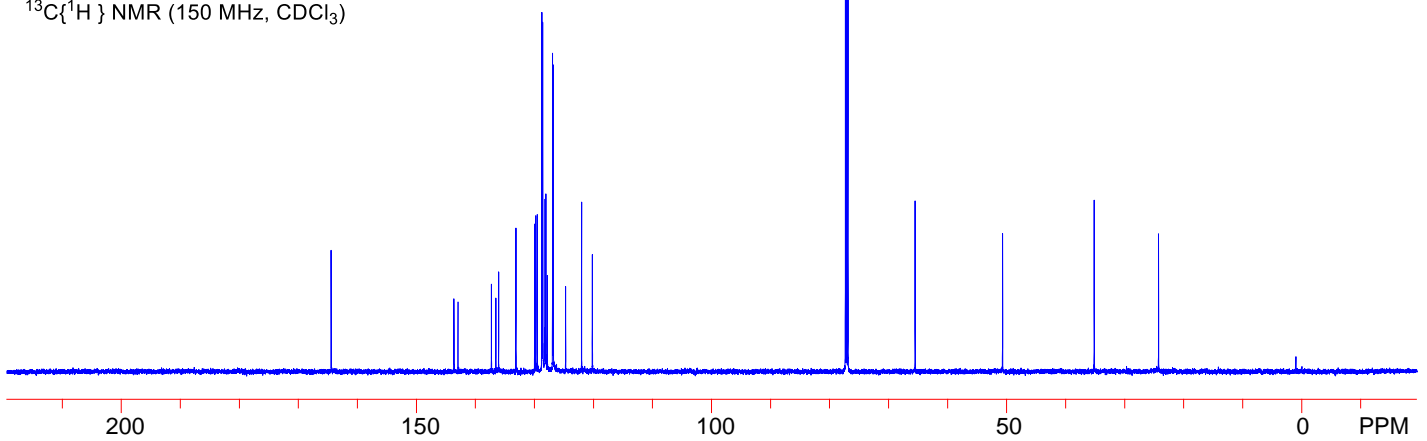



7.405  
7.386  
7.355  
7.337  
7.327  
7.309  
7.289  
7.270  
7.259  
7.256  
7.249  
7.242  
7.239  
7.235  
7.227  
7.224  
7.220  
7.217  
6.985  
6.945  
6.586  
6.546  
6.415  
6.375  
6.287  
6.247  
5.576  
5.324  
3.759  
3.748  
3.737  
3.725  
3.715  
3.703  
3.374  
3.352  
3.327  
3.305  
2.891  
2.869  
2.866  
2.850  
2.844  
2.828  
2.825  
2.803  
2.691  
2.680  
2.670  
2.659  
2.651  
2.639  
2.630  
2.619  
2.074

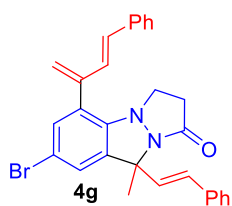

$^1\text{H NMR}$  (400 MHz,  $\text{CDCl}_3$ )

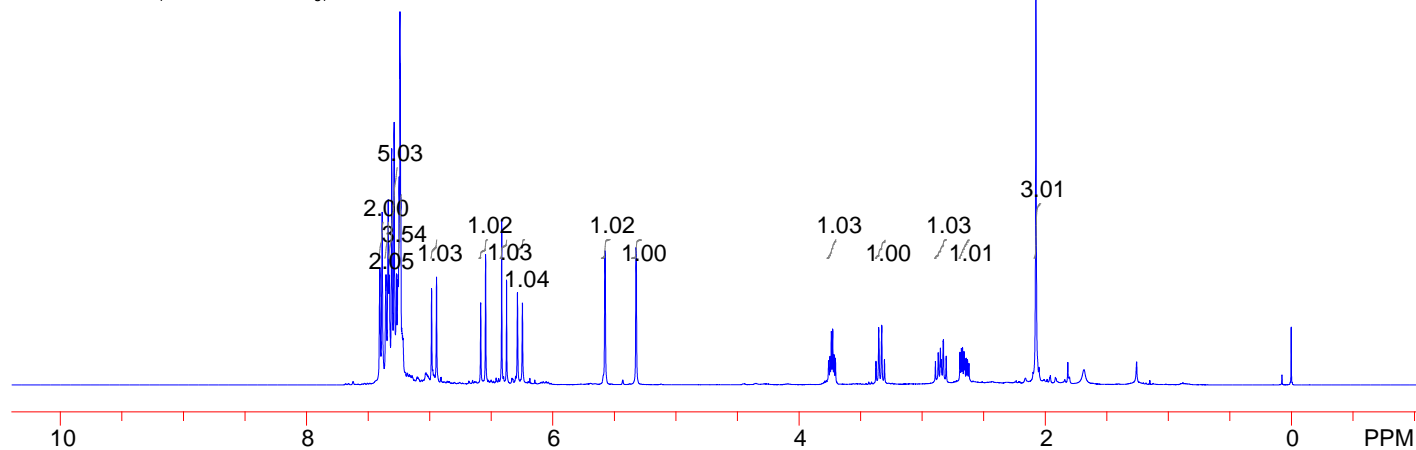

143.566  
164.390  
143.401  
137.619  
136.531  
136.058  
133.156  
132.723  
129.771  
129.516  
128.732  
128.593  
128.198  
128.061  
126.936  
126.821  
125.138  
124.834  
120.218  
114.947  
77.298  
77.087  
76.876  
65.420  
50.587  
35.187  
24.313

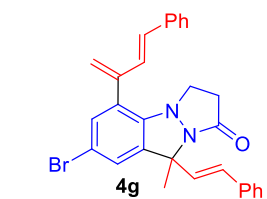

$^{13}\text{C}\{^1\text{H}\}$  NMR (150 MHz,  $\text{CDCl}_3$ )

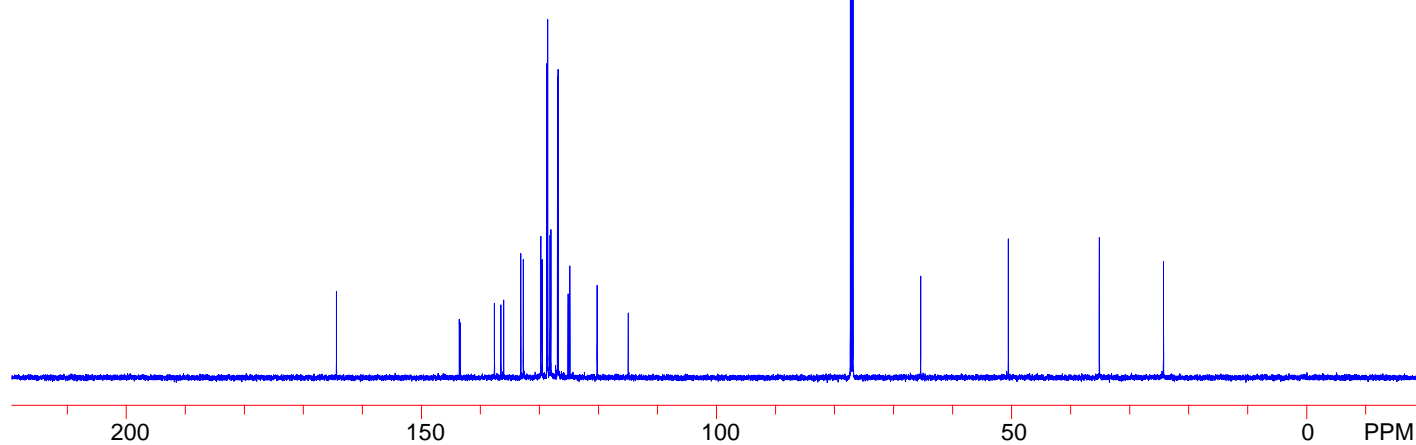

7.413  
7.409  
7.405  
7.386  
7.382  
7.378  
7.354  
7.350  
7.340  
7.334  
7.331  
7.323  
7.319  
7.303  
7.298  
7.279  
7.273  
7.268  
7.261  
7.255  
7.251  
7.243  
7.234  
7.011  
6.971  
6.567  
6.528  
6.423  
6.383  
6.213  
6.173  
5.632  
5.343  
3.851  
3.839  
3.828  
3.816  
3.805  
3.793  
3.528  
3.505  
3.481  
3.458  
2.936  
2.913  
2.895  
2.889  
2.872  
2.848  
2.758  
2.746  
2.735  
2.724  
2.717  
2.705  
2.694  
2.683  
2.097

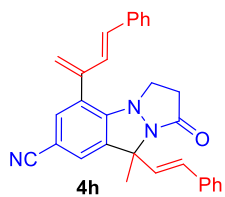

$^1\text{H NMR}$  (400 MHz,  $\text{CDCl}_3$ )

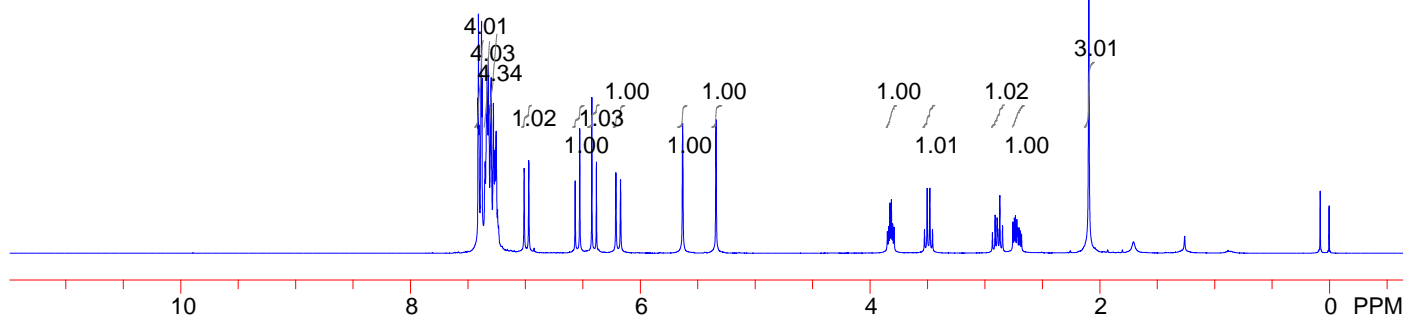

147.032  
164.038  
142.939  
136.489  
136.214  
135.738  
134.788  
133.383  
129.968  
129.165  
128.789  
128.664  
128.424  
128.285  
126.950  
126.843  
125.446  
123.423  
120.765  
118.944  
105.368  
77.313  
77.102  
76.891  
65.401  
49.101  
34.958  
24.370

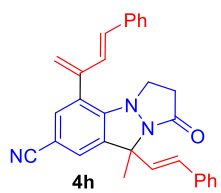

$^{13}\text{C}\{^1\text{H}\}$  NMR (150 MHz,  $\text{CDCl}_3$ )

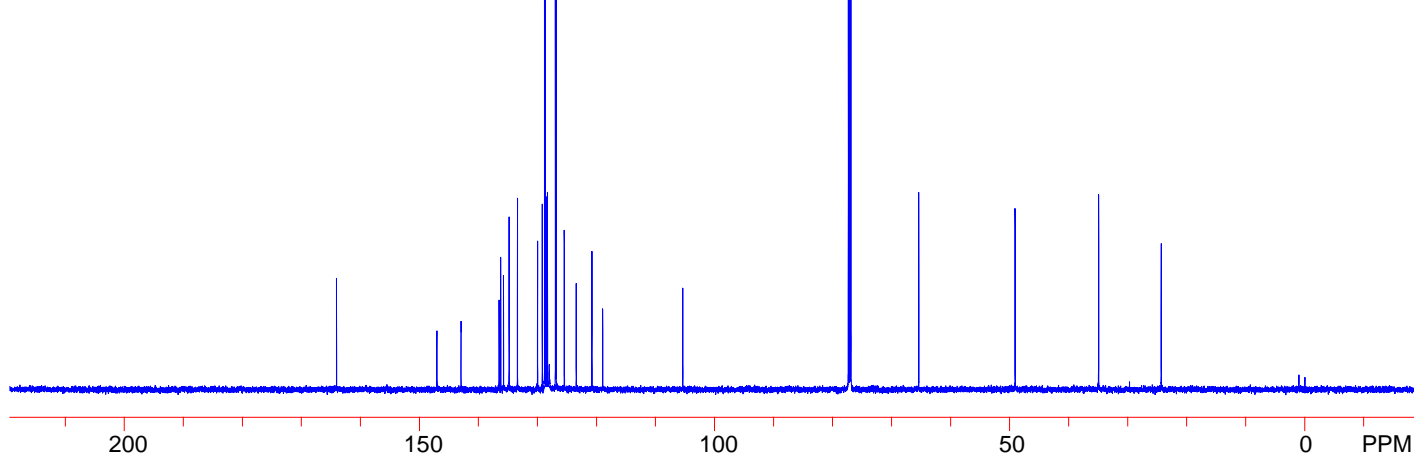

7.404  
7.392  
7.384  
7.384  
7.357  
7.354  
7.350  
7.337  
7.325  
7.313  
7.302  
7.300  
7.290  
7.277  
7.261  
7.253  
7.249  
7.246  
7.241  
7.237  
7.229  
7.013  
6.986  
6.584  
6.557  
6.429  
6.402  
6.243  
6.217  
5.623  
5.358  
3.827  
3.819  
3.812  
3.804  
3.797  
3.789  
3.456  
3.441  
3.424  
3.409  
2.914  
2.898  
2.886  
2.882  
2.870  
2.855  
2.719  
2.712  
2.705  
2.697  
2.692  
2.684  
2.678  
2.670  
2.116

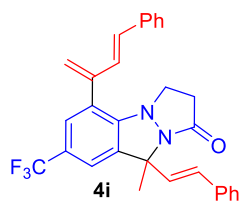

$^1\text{H NMR}$  (600 MHz,  $\text{CDCl}_3$ )

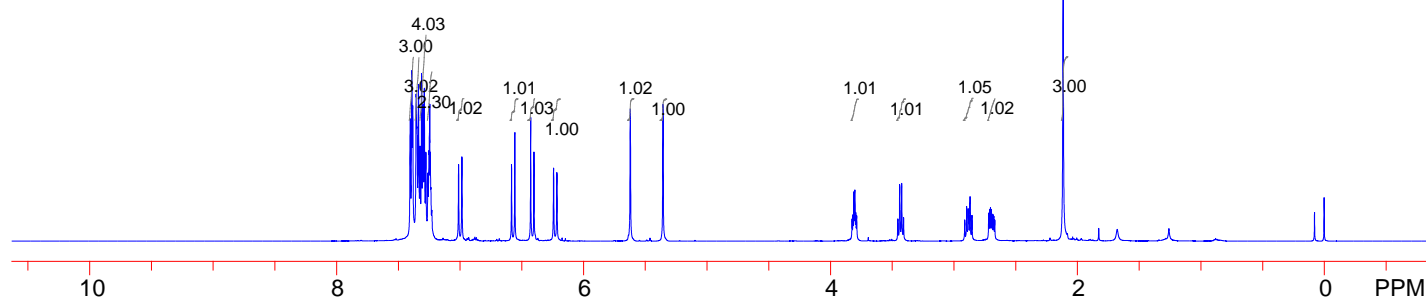

146.604  
143.660  
136.438  
136.243  
164.277  
135.957  
133.215  
129.662  
129.549  
128.752  
128.616  
128.267  
128.136  
127.843  
127.821  
126.961  
126.834  
125.305  
125.126  
125.086  
124.869  
124.653  
123.324  
123.236  
120.482  
118.914  
118.885  
77.291  
77.079  
76.867  
65.475  
49.812  
35.092  
24.325

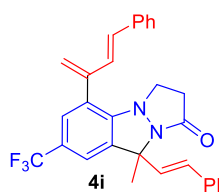

$^{13}\text{C}\{^1\text{H}\}$  NMR (150 MHz,  $\text{CDCl}_3$ )

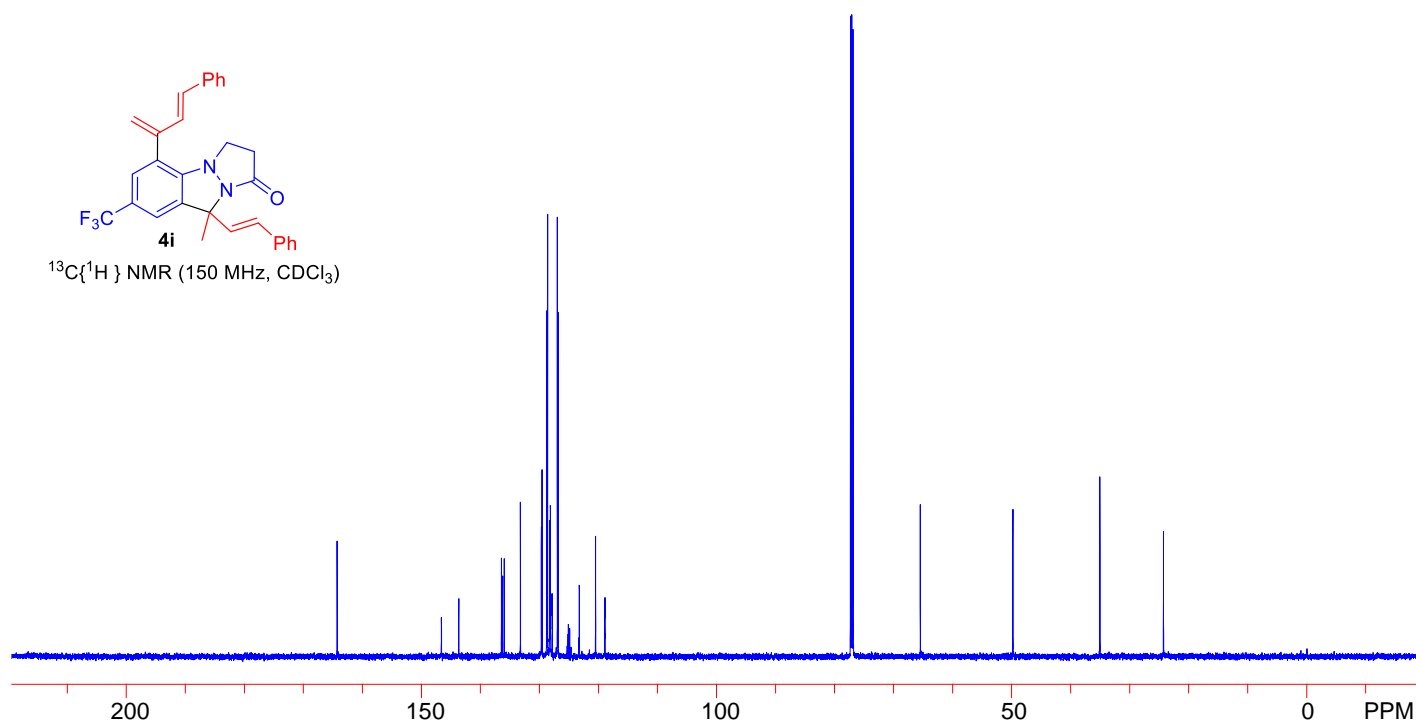

-61.204

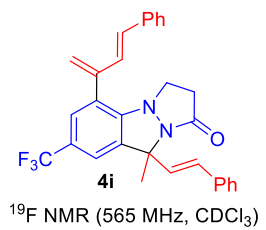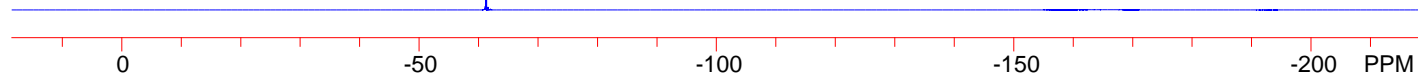

7.391  
7.378  
7.363  
7.350  
7.312  
7.300  
7.286  
7.273  
7.260  
7.247  
7.240  
7.238  
7.234  
7.231  
7.228  
7.225  
7.223  
7.216  
7.083  
7.075  
7.069  
7.061  
7.042  
7.015  
6.821  
6.806  
6.792  
6.556  
6.530  
6.470  
6.443  
6.276  
6.249  
5.732  
5.390  
3.763  
3.419  
3.405  
2.867  
2.851  
2.840  
2.836  
2.824  
2.809  
2.688  
2.680  
2.674  
2.666  
2.661  
2.653  
2.647  
2.639  
2.078

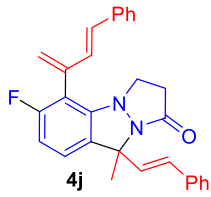

$^1\text{H NMR}$  (600 MHz,  $\text{CDCl}_3$ , 55  $^\circ\text{C}$ )

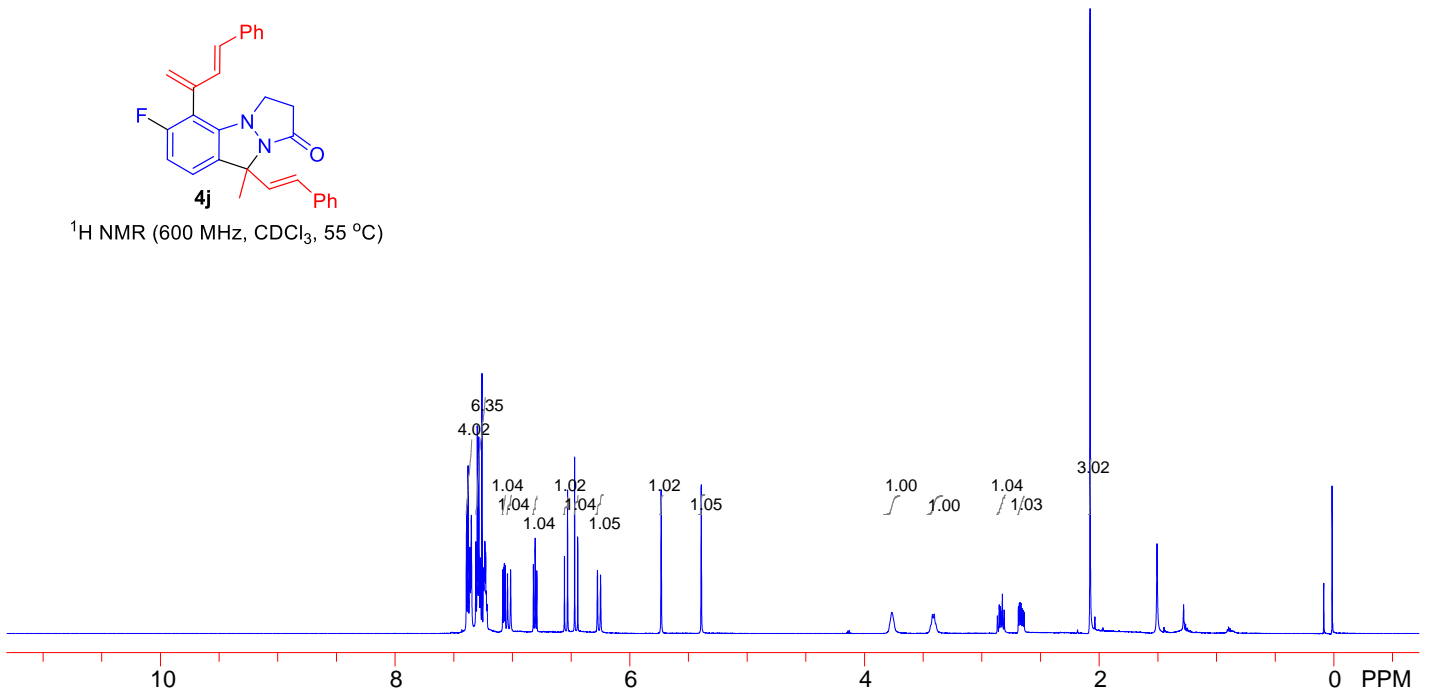

164.225  
161.533  
159.088  
136.542  
136.167  
132.352  
130.776  
130.242  
129.288  
128.672  
128.558  
128.095  
127.954  
126.888  
126.813  
122.728  
122.626  
121.744  
111.687  
111.456  
109.780  
109.534  
77.373  
77.055  
76.737  
65.321  
50.699  
35.269  
24.609

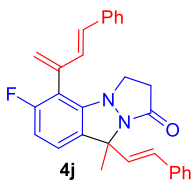

$^{13}\text{C}\{^1\text{H}\}$  NMR (100 MHz,  $\text{CDCl}_3$ )

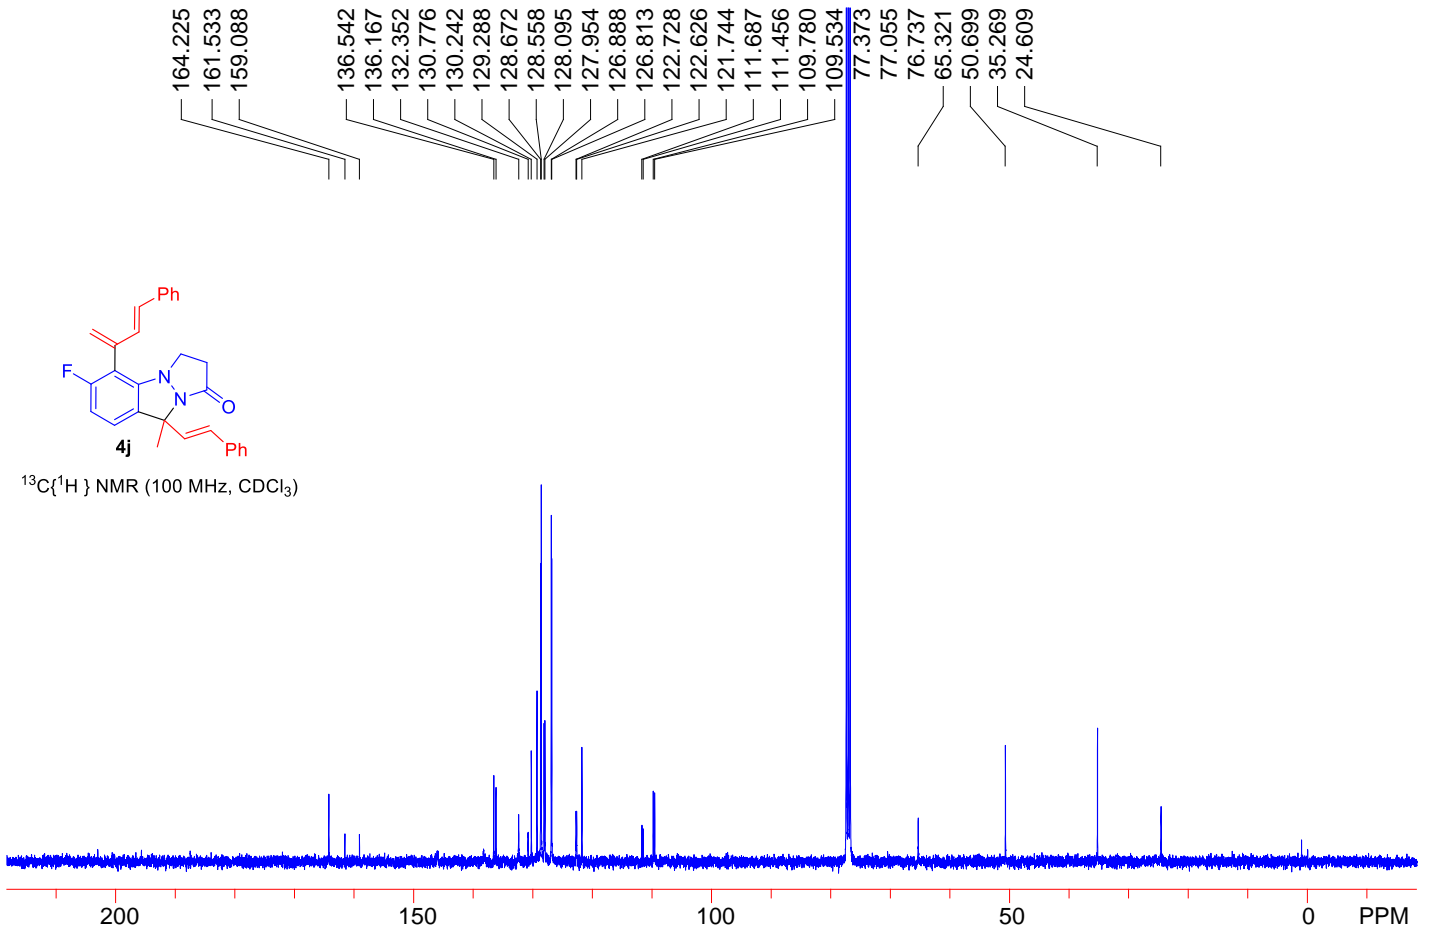

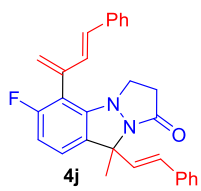

$^{19}\text{F}$  NMR (565 MHz,  $\text{CDCl}_3$ , 55 °C)

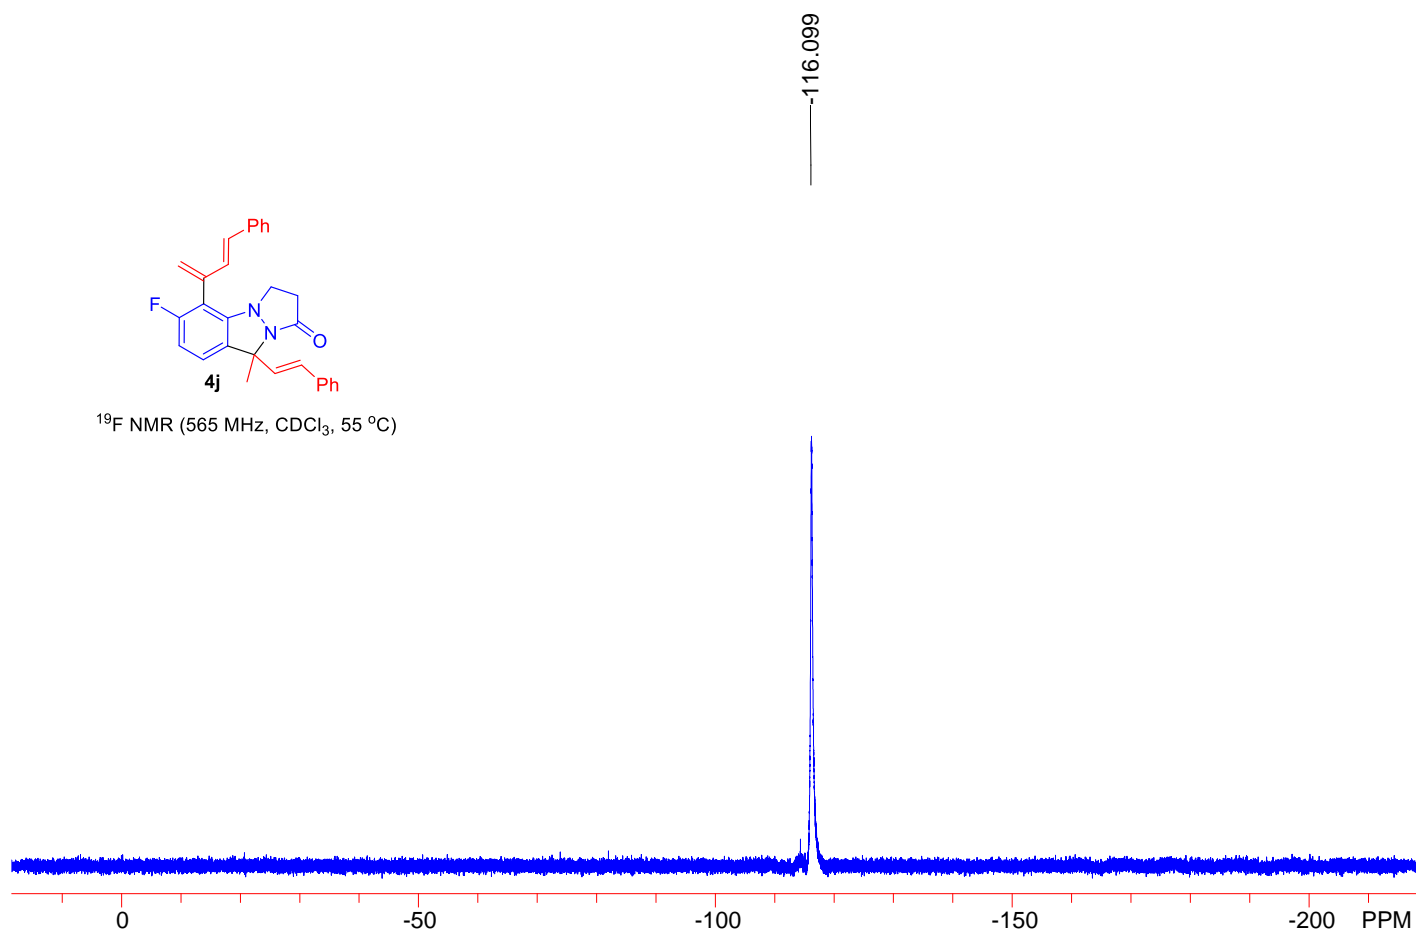

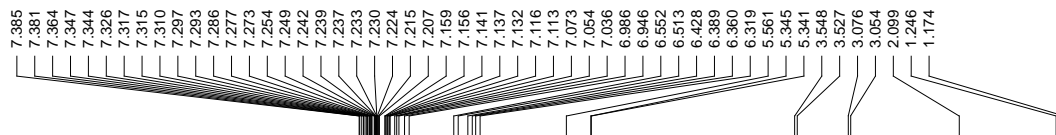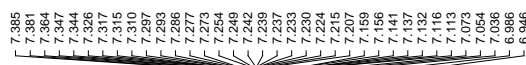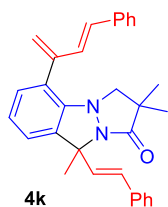

4k

$^1\text{H}$  NMR (400 MHz,  $\text{CDCl}_3$ )

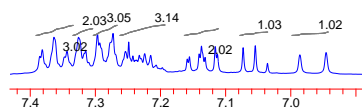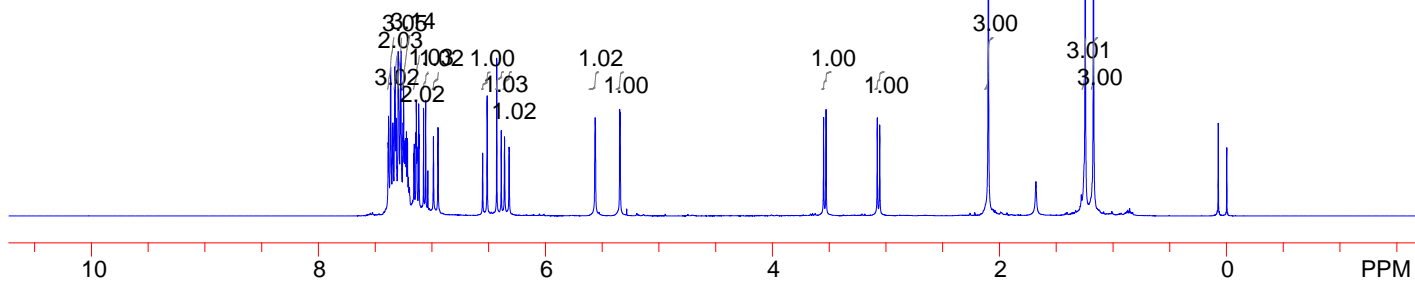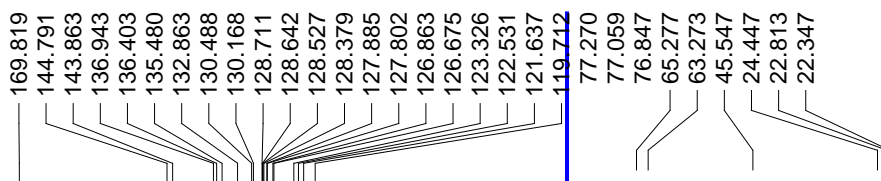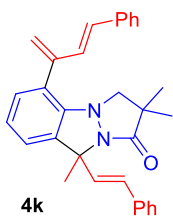

4k

$^{13}\text{C}\{^1\text{H}\}$  NMR (150 MHz,  $\text{CDCl}_3$ )

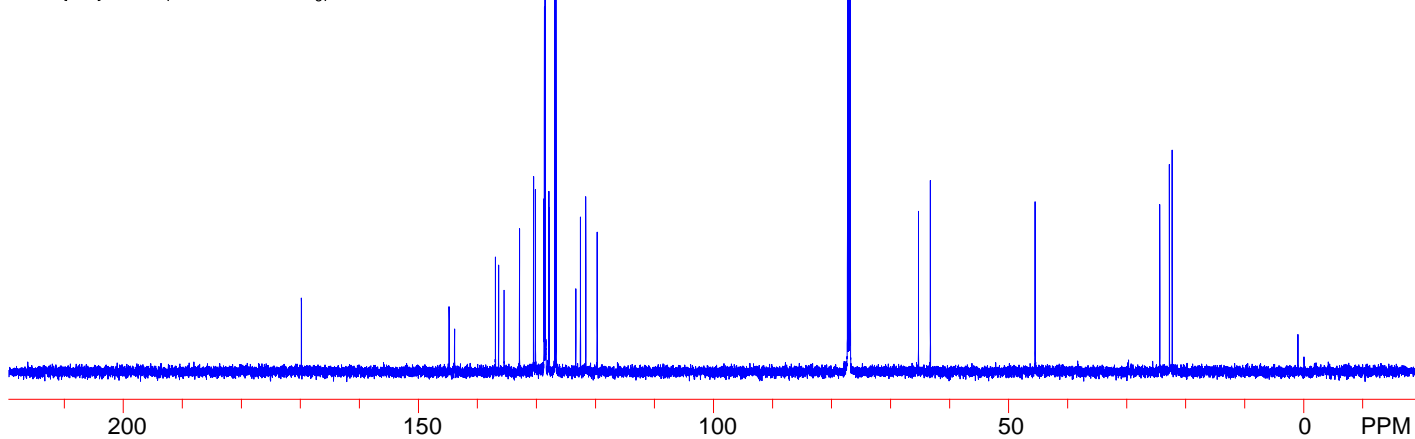

7.372  
7.353  
7.345  
7.340  
7.322  
7.302  
7.284  
7.266  
7.246  
7.236  
7.230  
7.227  
7.211  
7.194  
7.176  
7.172  
7.158  
7.155  
7.126  
7.123  
7.108  
7.104  
7.091  
7.072  
7.054  
7.016  
6.975  
6.524  
6.484  
6.406  
6.366  
6.308  
6.268  
5.568  
5.331  
4.087  
4.066  
4.045  
3.055  
3.043  
3.038  
3.025  
2.805  
2.783  
2.775  
2.753  
2.158  
1.200  
1.182

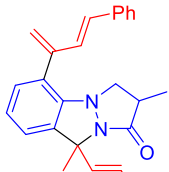

4I-1

$^1\text{H}$  NMR (400 MHz,  $\text{CDCl}_3$ )

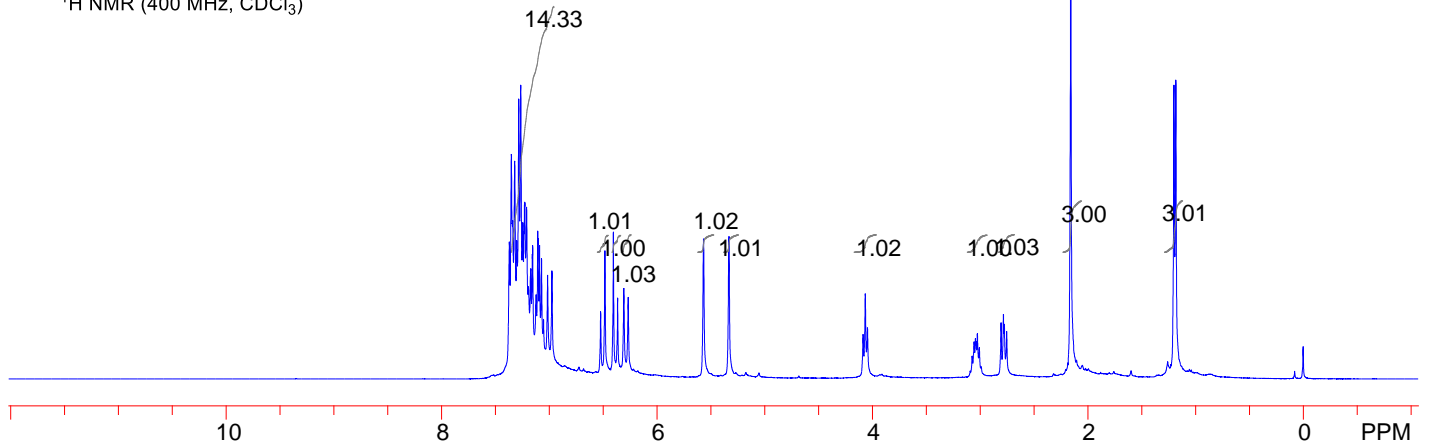

167.219  
144.728  
144.082  
136.838  
136.337  
135.477  
132.800  
130.439  
130.226  
128.650  
128.507  
127.934  
127.787  
126.836  
126.757  
123.567  
122.716  
121.606  
119.725  
77.372  
77.054  
76.736  
65.609  
58.203  
40.644  
24.576  
13.351

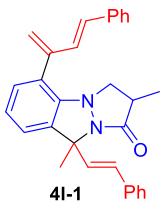

4I-1

$^{13}\text{C}\{^1\text{H}\}$  NMR (100 MHz,  $\text{CDCl}_3$ )

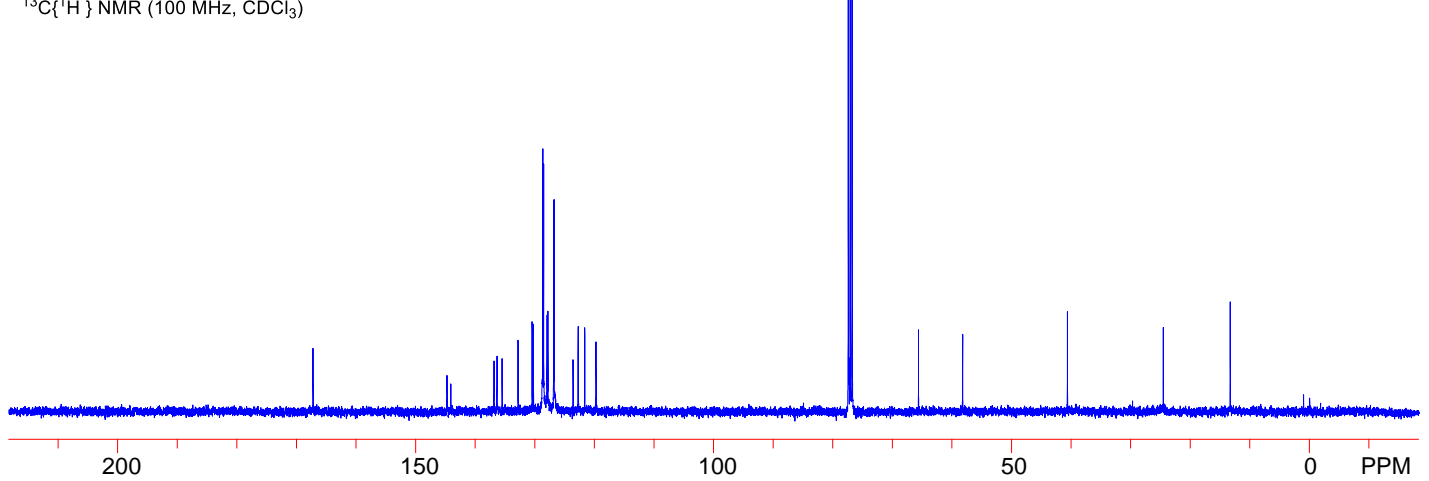



7.421  
7.403  
7.380  
7.361  
7.319  
7.314  
7.301  
7.283  
7.249  
7.234  
7.229  
7.214  
7.117  
7.099  
7.068  
7.063  
7.046  
7.025  
6.983  
6.635  
6.595  
6.553  
6.548  
6.513  
6.508  
6.344  
6.304  
5.578  
5.342  
3.770  
3.750  
3.728  
3.161  
3.142  
3.120  
2.916  
2.898  
2.879  
2.861  
1.985  
1.243  
1.230  
1.225

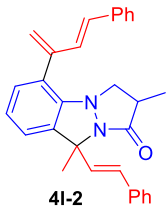

$^1\text{H NMR}$  (400 MHz,  $\text{CDCl}_3$ )

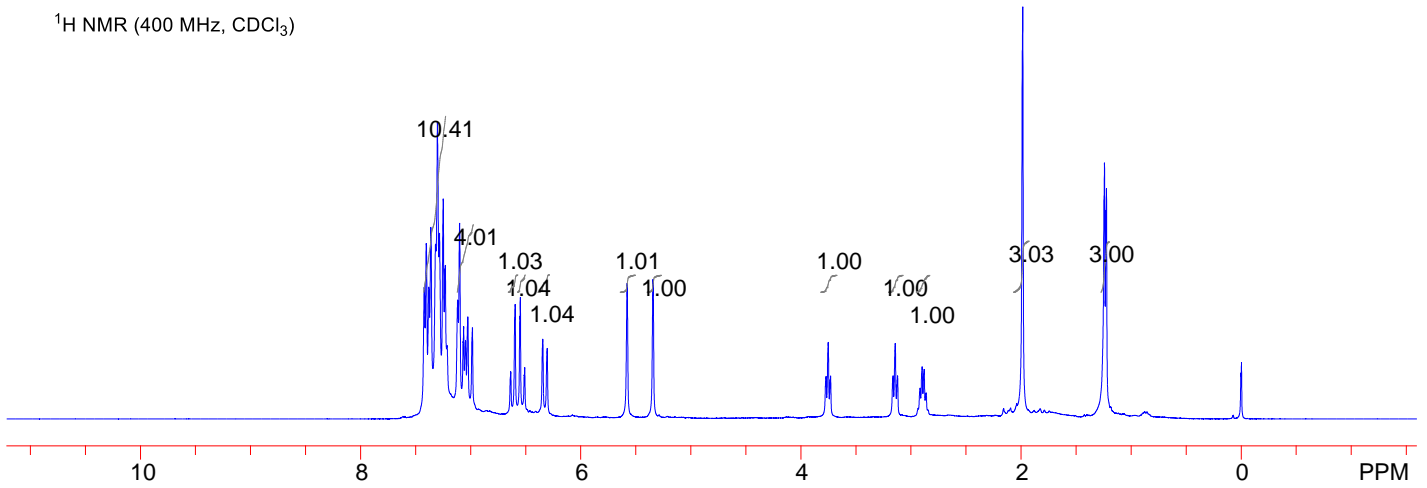

144.766  
167.316  
144.174  
136.893  
136.445  
135.608  
132.783  
130.689  
130.219  
129.381  
128.934  
128.674  
128.522  
127.944  
127.836  
126.933  
126.723  
123.350  
122.585  
122.000  
119.761  
77.377  
77.060  
76.742  
65.135  
57.717  
41.141  
24.427  
14.323

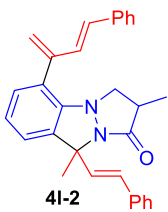

$^{13}\text{C}\{^1\text{H}\}$  NMR (100 MHz,  $\text{CDCl}_3$ )

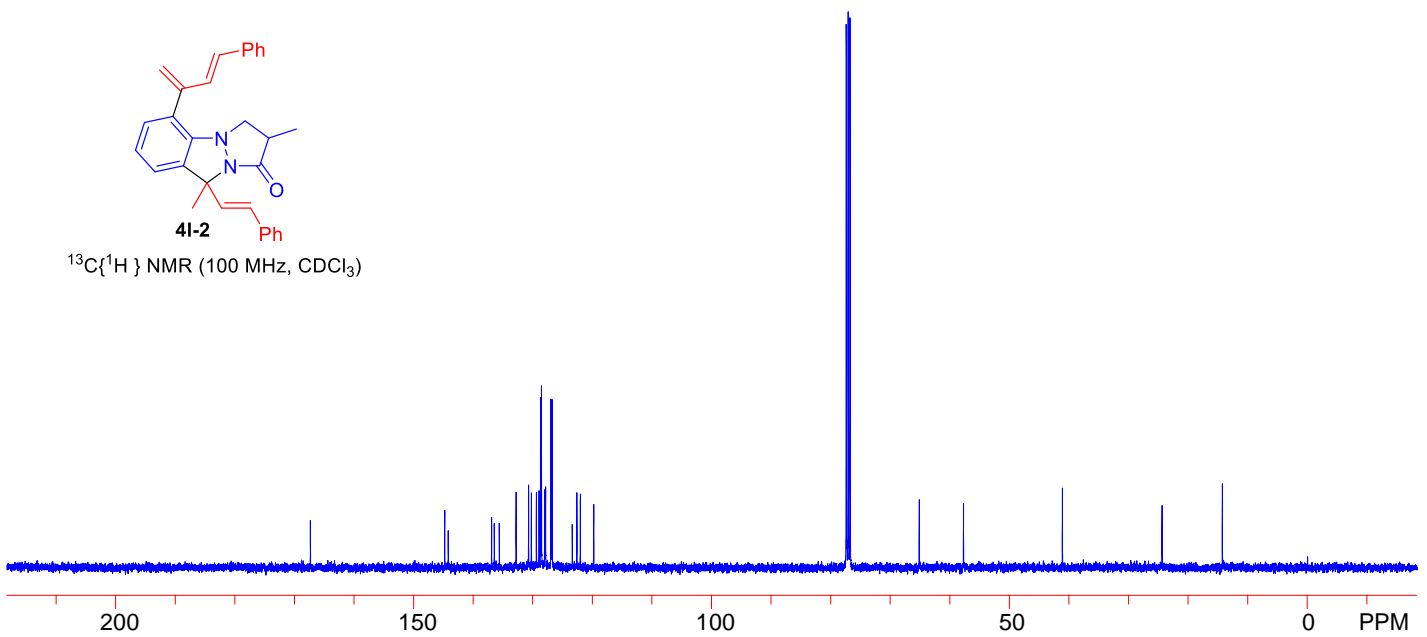

7.282  
7.268  
7.250  
7.247  
7.237  
7.132  
7.129  
7.119  
7.117  
7.107  
7.097  
7.094  
7.085  
7.073  
7.061  
7.048  
6.972  
6.946  
6.524  
6.497  
6.408  
6.381  
6.270  
6.243  
5.533  
5.291  
5.288  
3.780  
3.773  
3.765  
3.758  
3.750  
3.743  
3.361  
3.346  
3.344  
3.329  
3.314  
2.876  
2.861  
2.858  
2.849  
2.843  
2.834  
2.832  
2.817  
2.664  
2.657  
2.650  
2.643  
2.638  
2.630  
2.623  
2.616  
2.322  
2.083

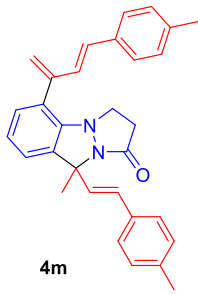

$^1\text{H NMR}$  (600 MHz,  $\text{CDCl}_3$ )

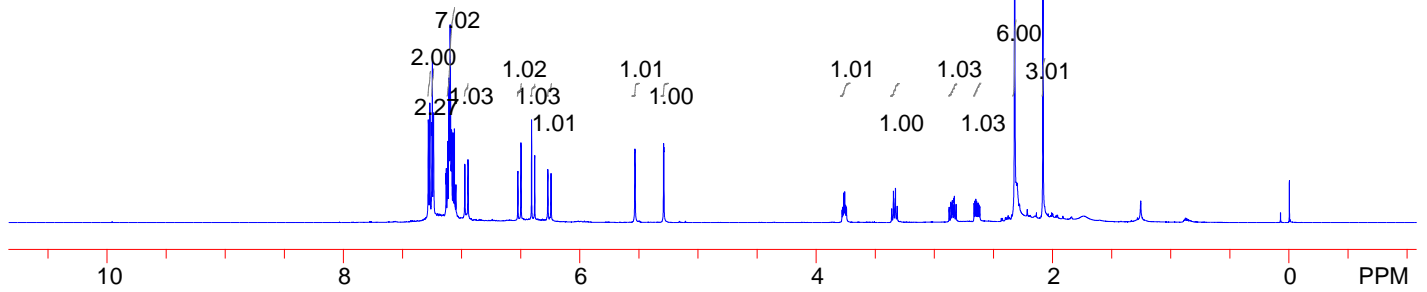

144.837  
164.439  
144.230  
137.961  
137.655  
135.597  
134.022  
133.557  
132.719  
130.226  
129.452  
129.389  
129.221  
128.951  
128.073  
126.783  
126.689  
123.570  
122.723  
121.771  
119.205  
77.293  
77.081  
76.871  
65.512  
50.756  
35.335  
24.492  
21.282  
21.245

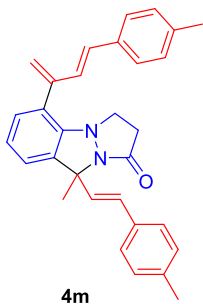

$^{13}\text{C}\{^1\text{H}\}$  NMR (150 MHz,  $\text{CDCl}_3$ )

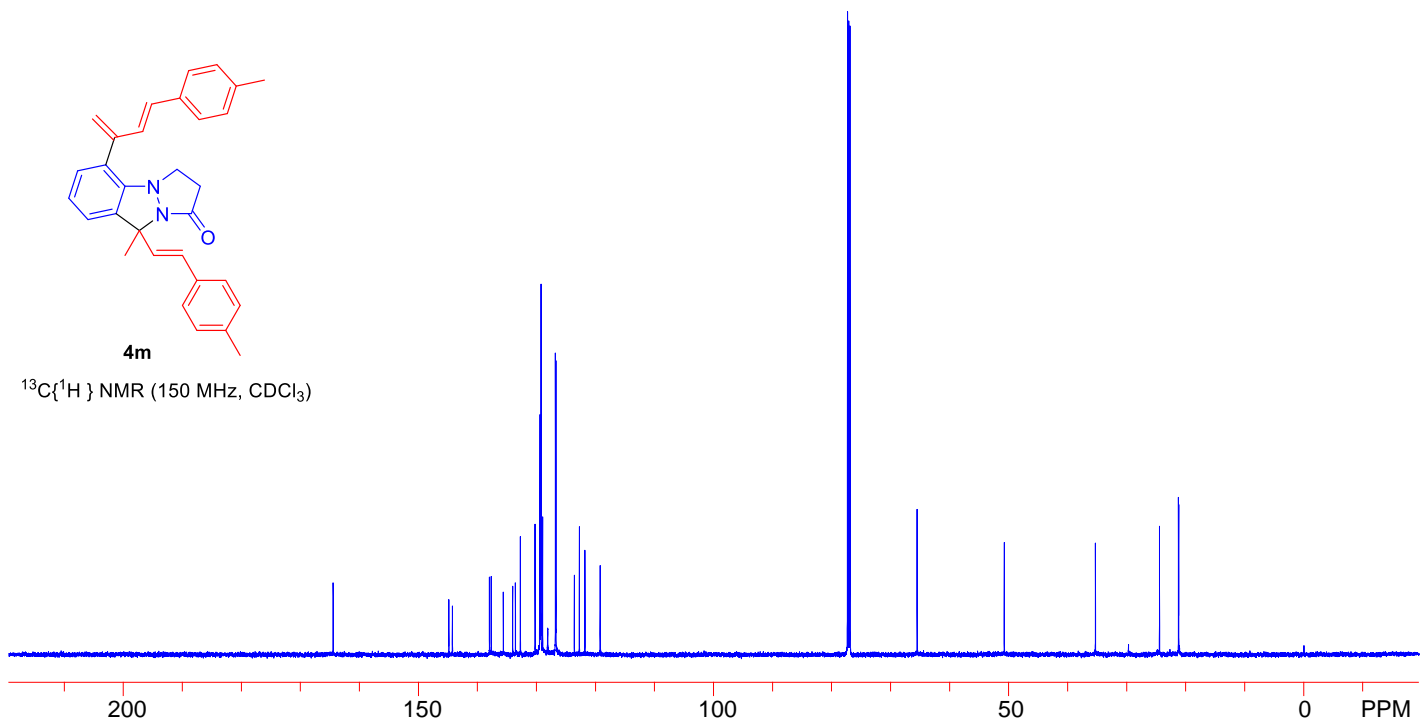

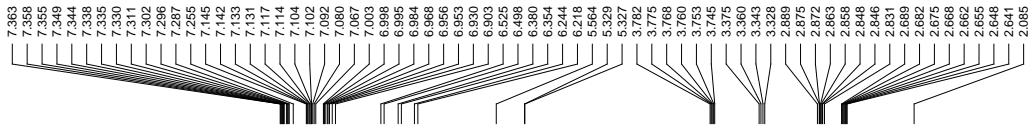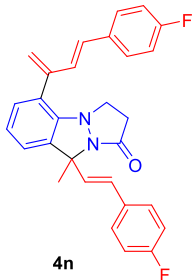

$^1\text{H NMR}$  (600 MHz,  $\text{CDCl}_3$ )

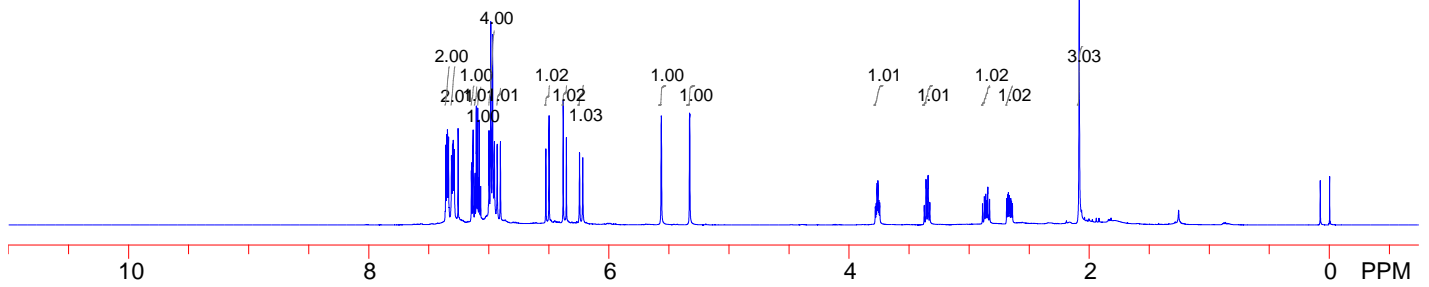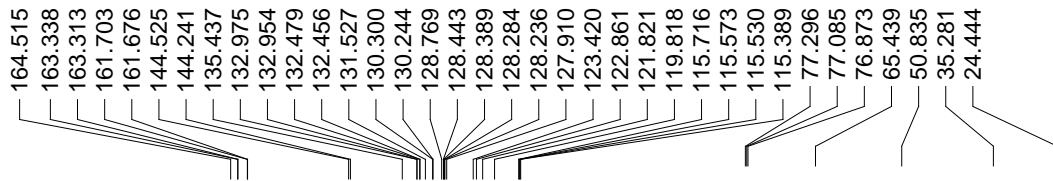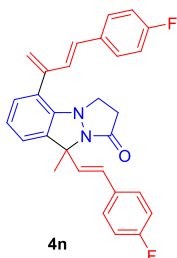

$^{13}\text{C}\{^1\text{H}\}$  NMR (150 MHz,  $\text{CDCl}_3$ )

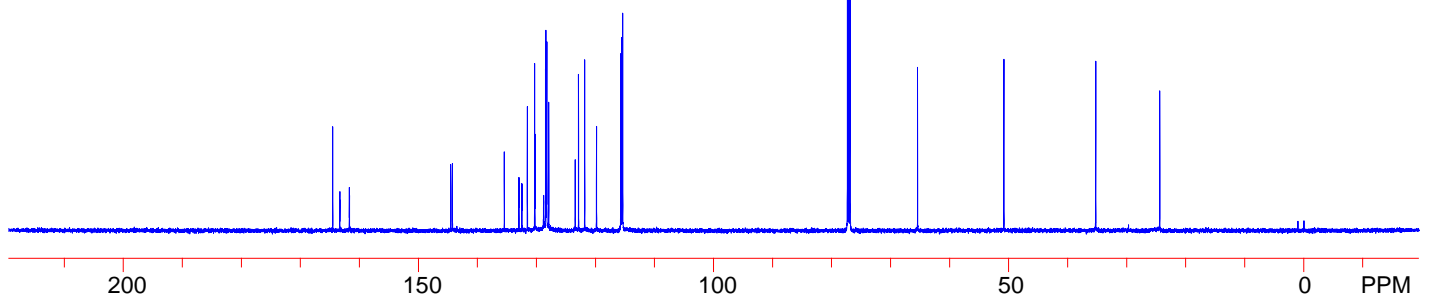

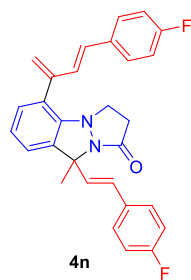

$^{19}\text{F}$  NMR (565 MHz,  $\text{CDCl}_3$ )

-113.476  
-113.492  
-113.500  
-113.509  
-113.517  
-113.528  
-114.004  
-114.012  
-114.019  
-114.031  
-114.038  
-114.045  
-114.051

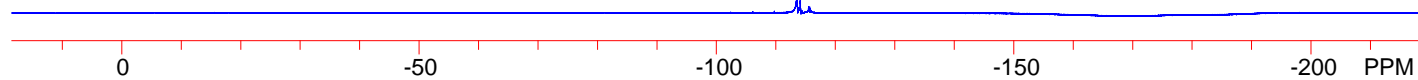

7.427  
7.409  
7.406  
7.388  
7.256  
7.252  
7.230  
7.202  
7.181  
7.147  
7.141  
7.130  
7.125  
7.113  
7.100  
7.094  
7.077  
7.059  
7.002  
6.962  
6.510  
6.471  
6.443  
6.403  
6.217  
6.177  
5.590  
5.359  
5.357  
3.783  
3.772  
3.761  
3.750  
3.739  
3.728  
3.370  
3.348  
3.322  
3.300  
2.905  
2.883  
2.880  
2.865  
2.857  
2.843  
2.839  
2.817  
2.695  
2.684  
2.674  
2.663  
2.655  
2.644  
2.633  
2.622  
2.081

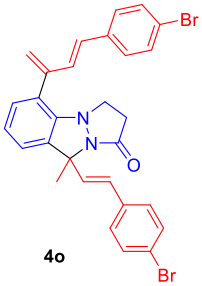

$^1\text{H NMR}$  (400 MHz,  $\text{CDCl}_3$ )

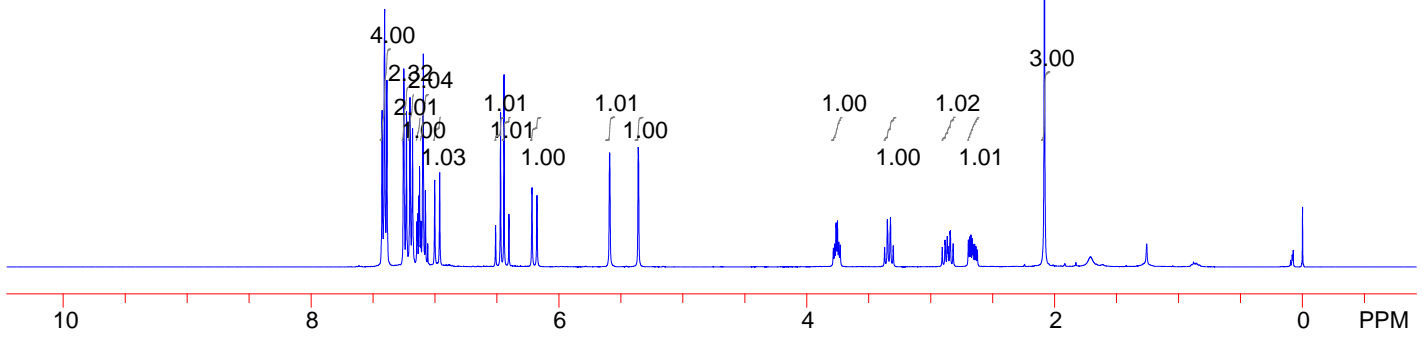

144.430  
164.549  
144.217  
135.703  
135.303  
135.273  
131.798  
131.657  
131.500  
131.223  
130.340  
129.614  
128.387  
128.181  
127.889  
123.277  
122.922  
121.857  
121.797  
121.691  
120.457  
77.294  
77.082  
76.870  
65.439  
50.848  
35.250  
24.391

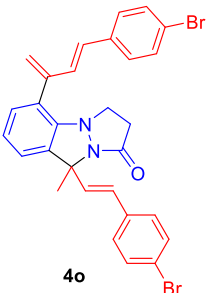

$^{13}\text{C}\{^1\text{H}\}$  NMR (150 MHz,  $\text{CDCl}_3$ )

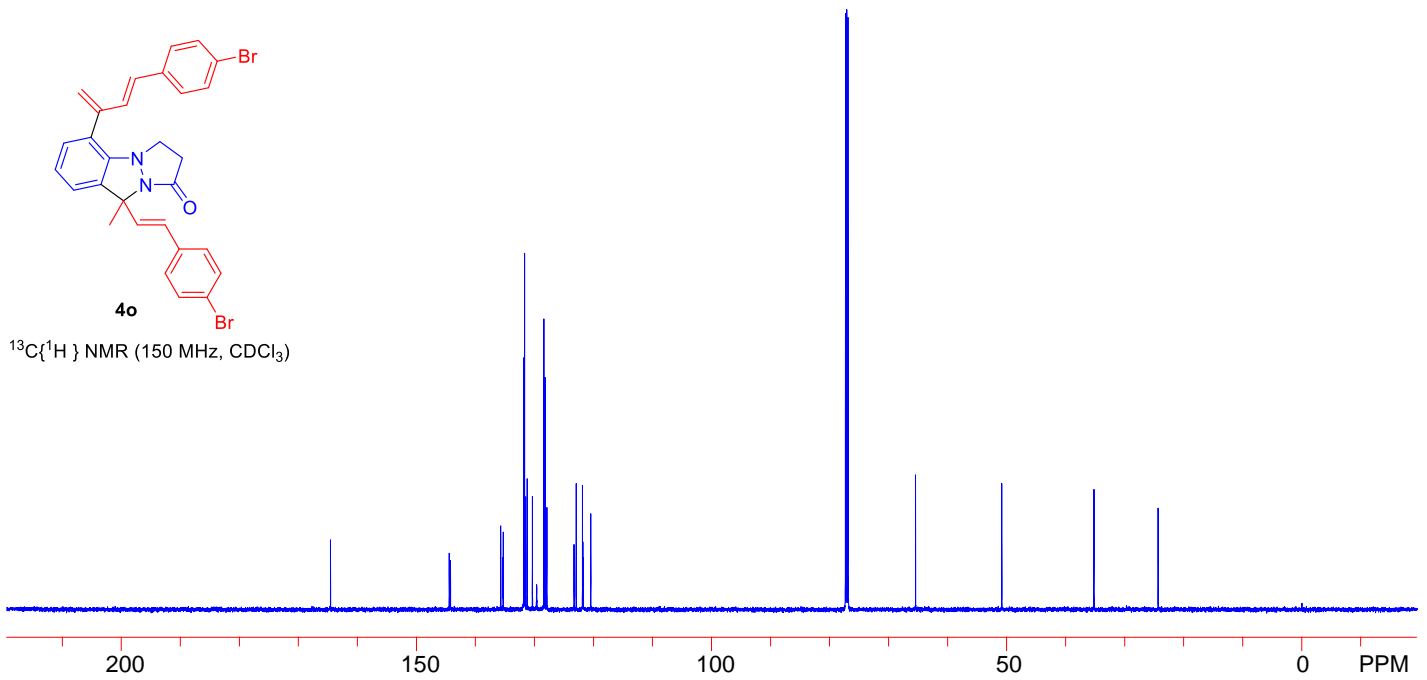

7.586  
7.572  
7.564  
7.550  
7.467  
7.453  
7.416  
7.402  
7.257  
7.161  
7.156  
7.151  
7.146  
7.138  
7.118  
7.110  
7.106  
7.100  
7.085  
6.598  
6.571  
6.565  
6.539  
6.274  
6.247  
5.683  
5.451  
3.764  
3.757  
3.750  
3.742  
3.735  
3.727  
3.374  
3.359  
3.342  
3.328  
2.891  
2.876  
2.874  
2.864  
2.859  
2.849  
2.847  
2.832  
2.704  
2.696  
2.690  
2.682  
2.677  
2.669  
2.663  
2.655  
2.083

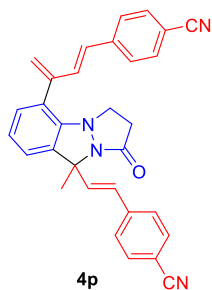

$^1\text{H}$  NMR (600 MHz,  $\text{CDCl}_3$ )

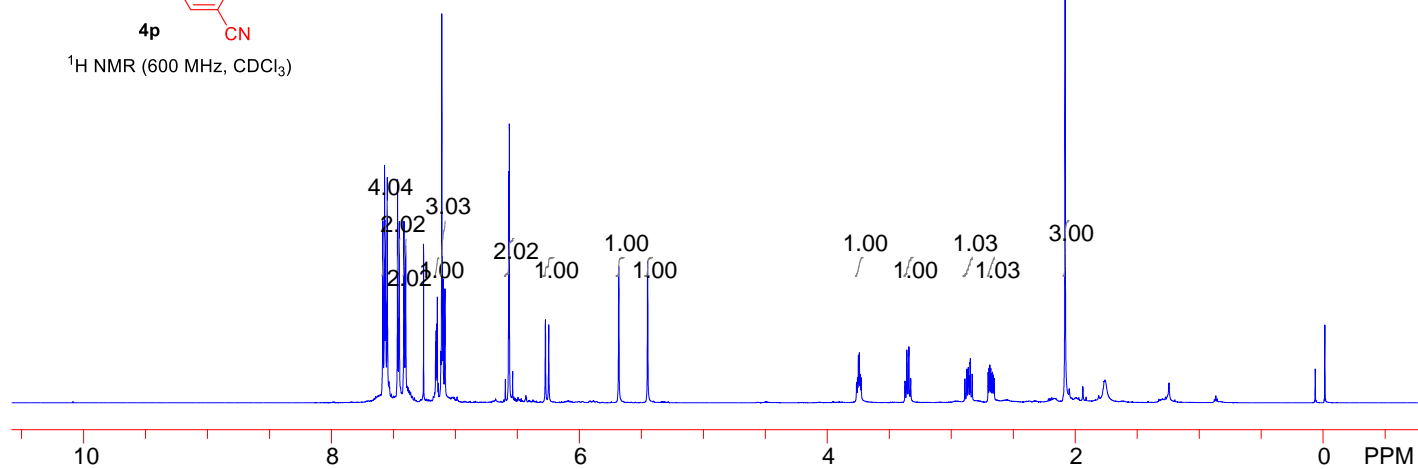

164.663  
144.237  
140.203  
139.801  
135.186  
133.008  
131.292  
131.215  
130.422  
129.809  
129.780  
129.598  
129.566  
127.754  
127.026  
126.813  
125.622  
125.604  
125.524  
125.501  
125.062  
125.014  
123.260  
123.213  
123.130  
123.052  
121.949  
121.476  
77.270  
77.058  
76.846  
65.437  
50.915  
35.202  
24.348

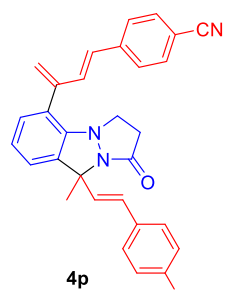

$^{13}\text{C}\{^1\text{H}\}$  NMR (150 MHz,  $\text{CDCl}_3$ )

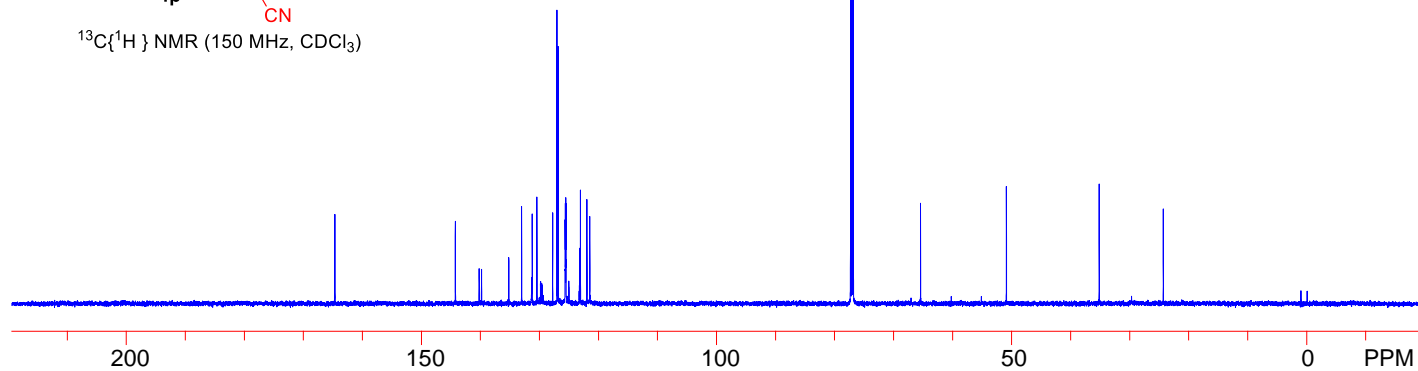

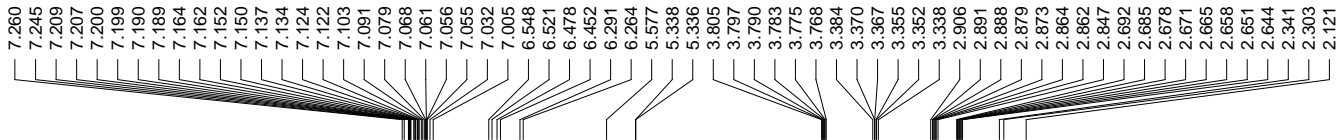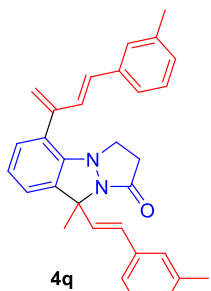

4q

<sup>1</sup>H NMR (600 MHz, CDCl<sub>3</sub>)

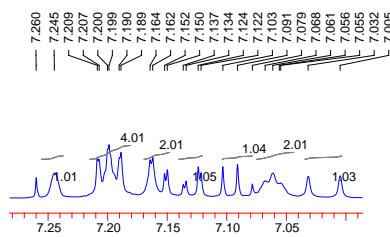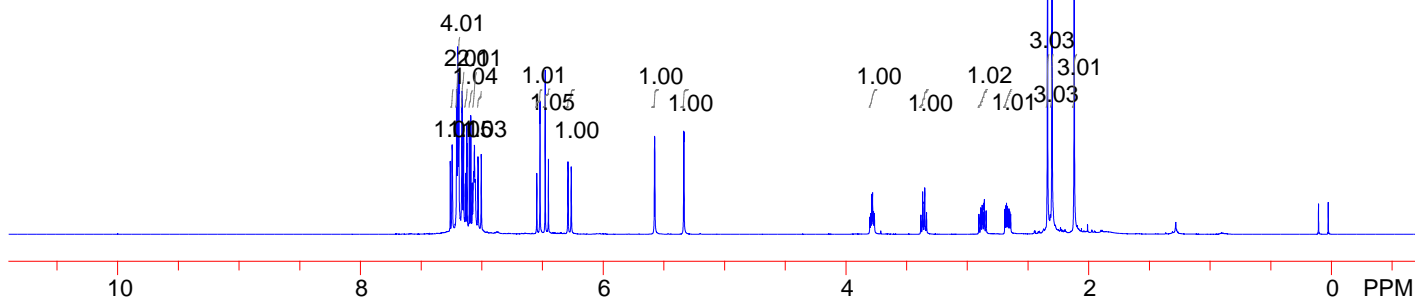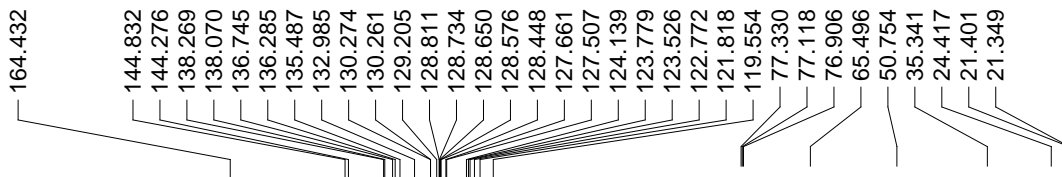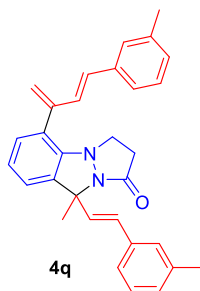

4q

<sup>13</sup>C{<sup>1</sup>H} NMR (150 MHz, CDCl<sub>3</sub>)

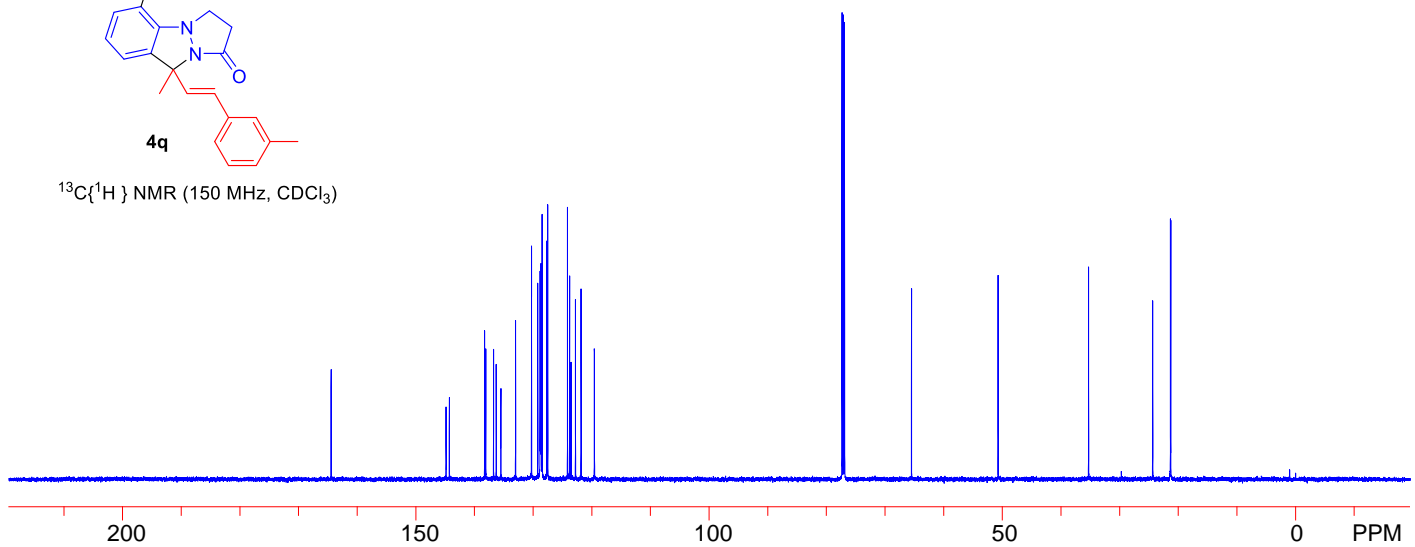

7.380  
7.348  
7.256  
7.251  
7.244  
7.232  
7.225  
7.214  
7.208  
7.203  
7.197  
7.192  
7.187  
7.181  
7.146  
7.135  
7.129  
7.114  
7.102  
7.098  
7.087  
7.082  
7.063  
7.018  
6.978  
6.525  
6.485  
6.460  
6.421  
6.222  
6.182  
5.605  
5.376  
5.373  
5.373  
3.783  
3.772  
3.762  
3.750  
3.739  
3.728  
3.728  
3.374  
3.352  
3.326  
3.305  
3.305  
2.916  
2.894  
2.890  
2.876  
2.868  
2.853  
2.850  
2.828  
2.703  
2.692  
2.682  
2.671  
2.663  
2.652  
2.642  
2.631  
2.090

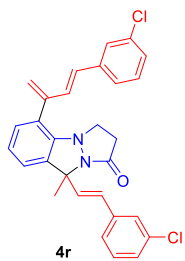

$^1\text{H NMR}$  (400 MHz,  $\text{CDCl}_3$ )

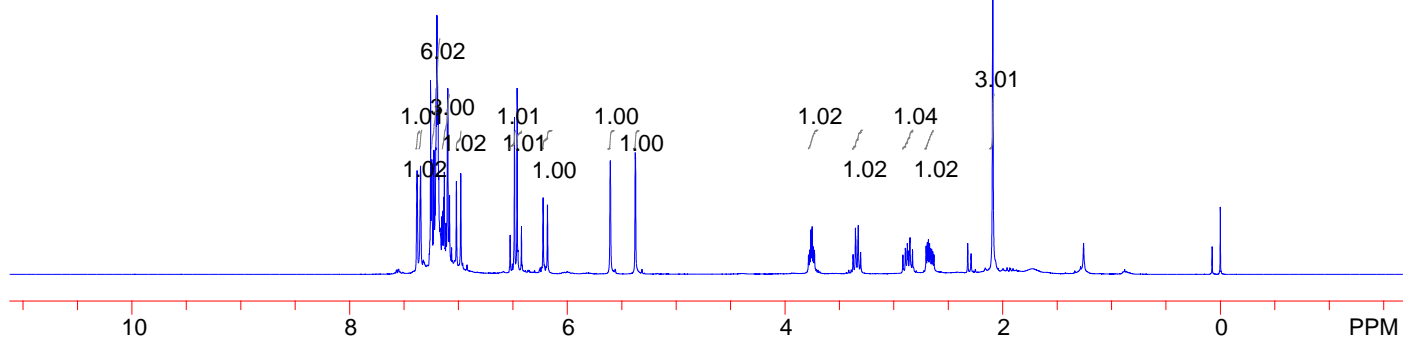

164.550  
144.356  
144.184  
138.652  
138.186  
135.280  
134.689  
134.536  
131.926  
131.376  
130.347  
130.205  
129.889  
129.799  
127.867  
127.812  
127.753  
126.700  
126.474  
125.145  
125.020  
123.213  
122.961  
121.852  
120.797  
77.386  
77.069  
76.751  
65.378  
50.843  
35.241  
24.296

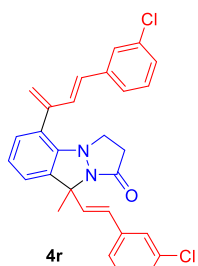

$^{13}\text{C}\{^1\text{H}\}$  NMR (100 MHz,  $\text{CDCl}_3$ )

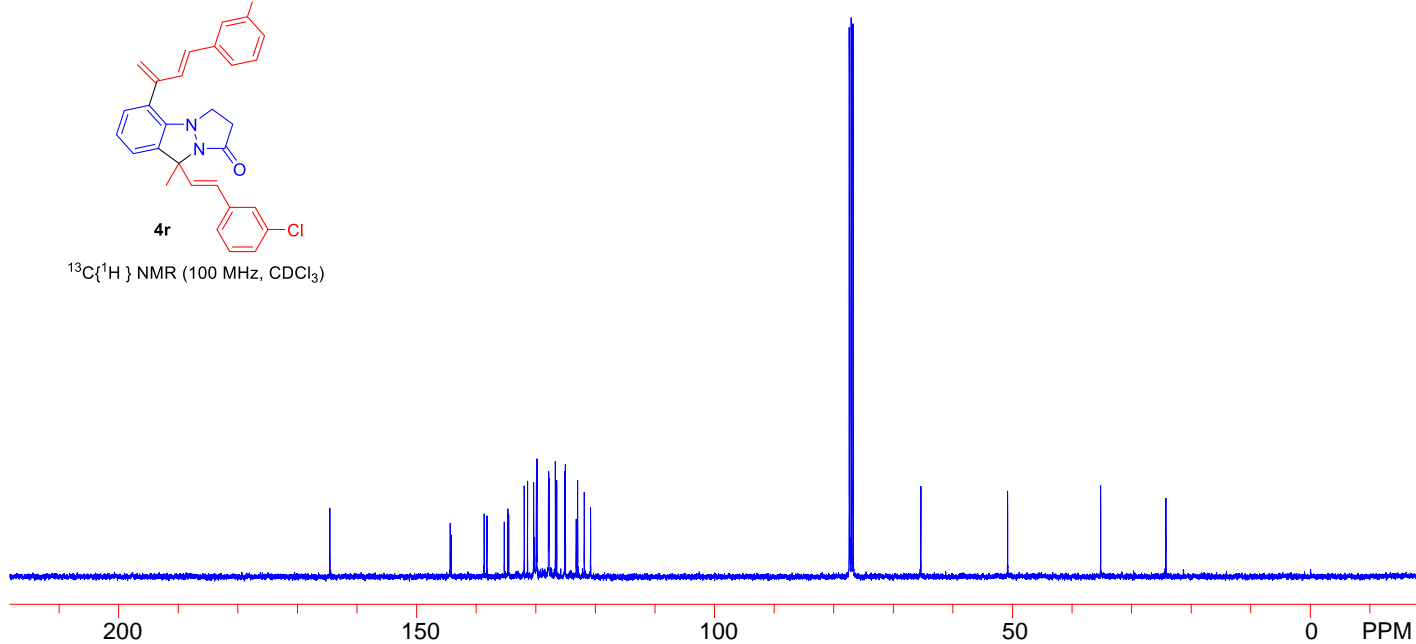



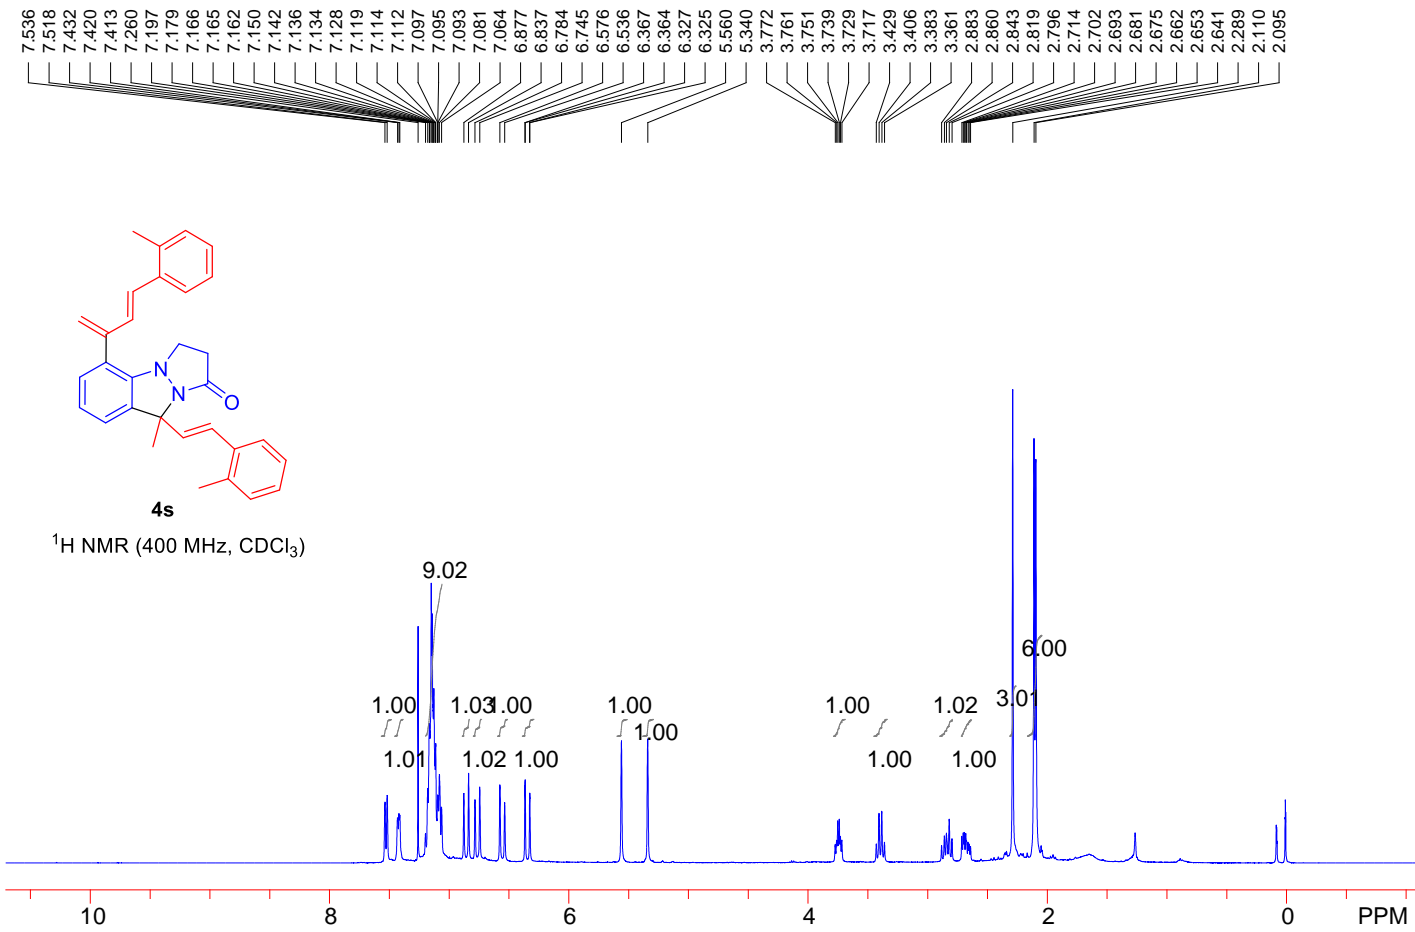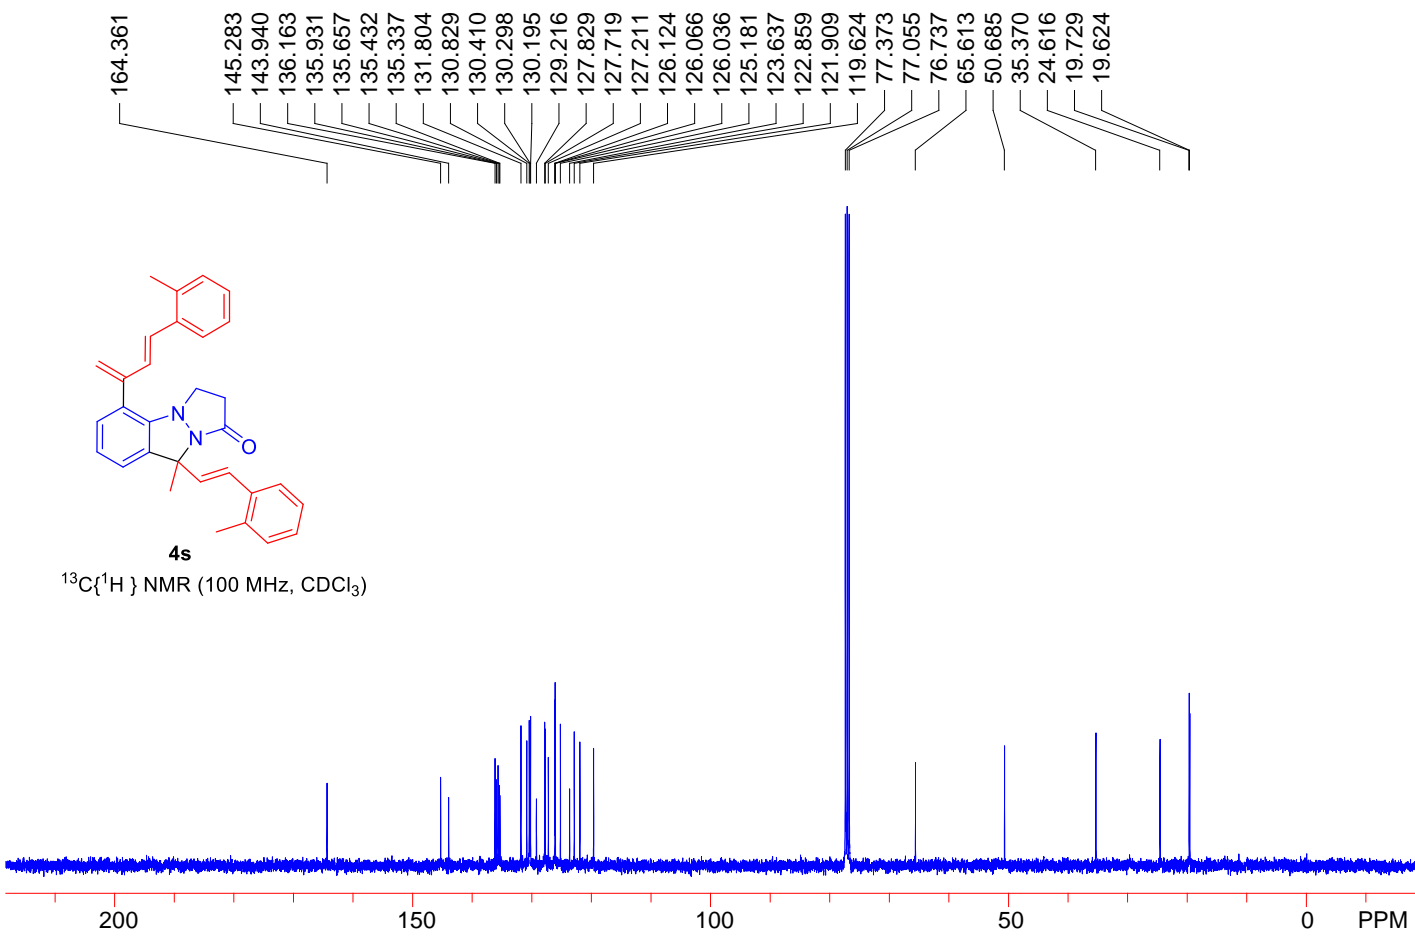

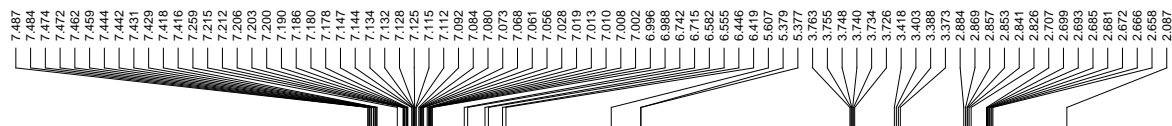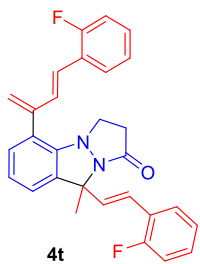

$^1\text{H NMR}$  (600 MHz,  $\text{CDCl}_3$ )

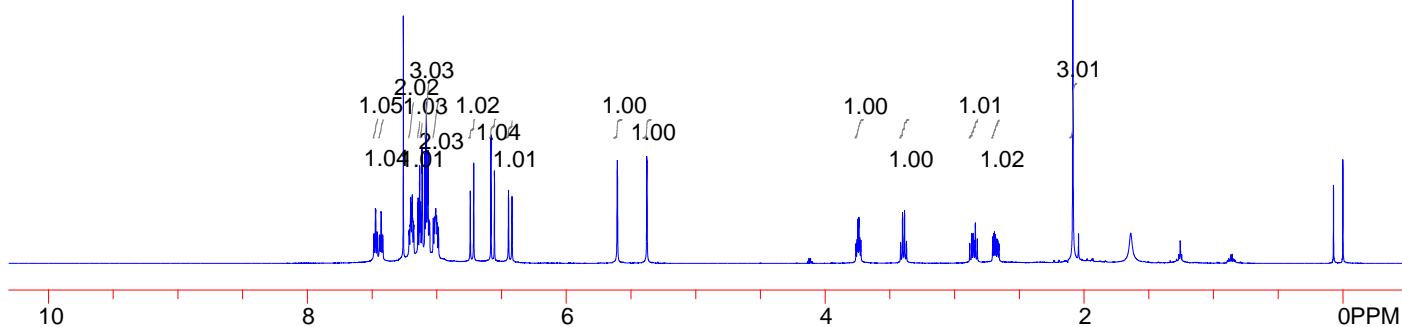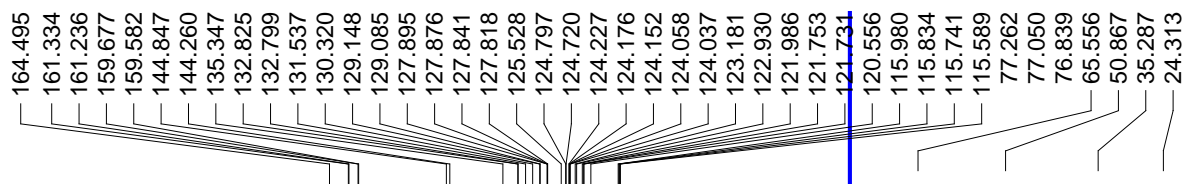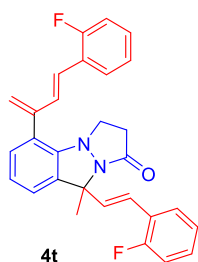

$^{13}\text{C}\{^1\text{H}\}$  NMR (150 MHz,  $\text{CDCl}_3$ )

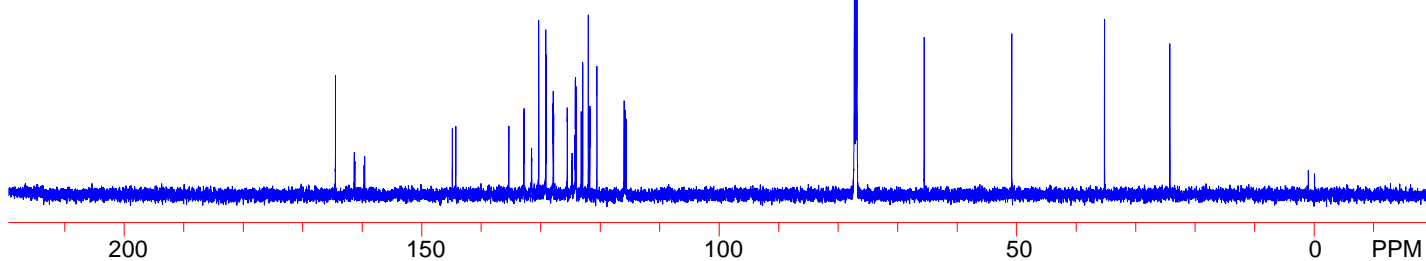

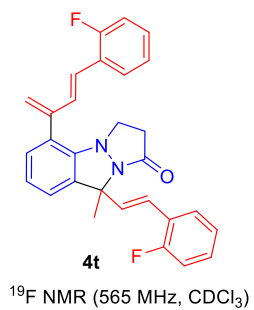

116.728  
117.450  
117.463  
117.470  
117.484  
117.494

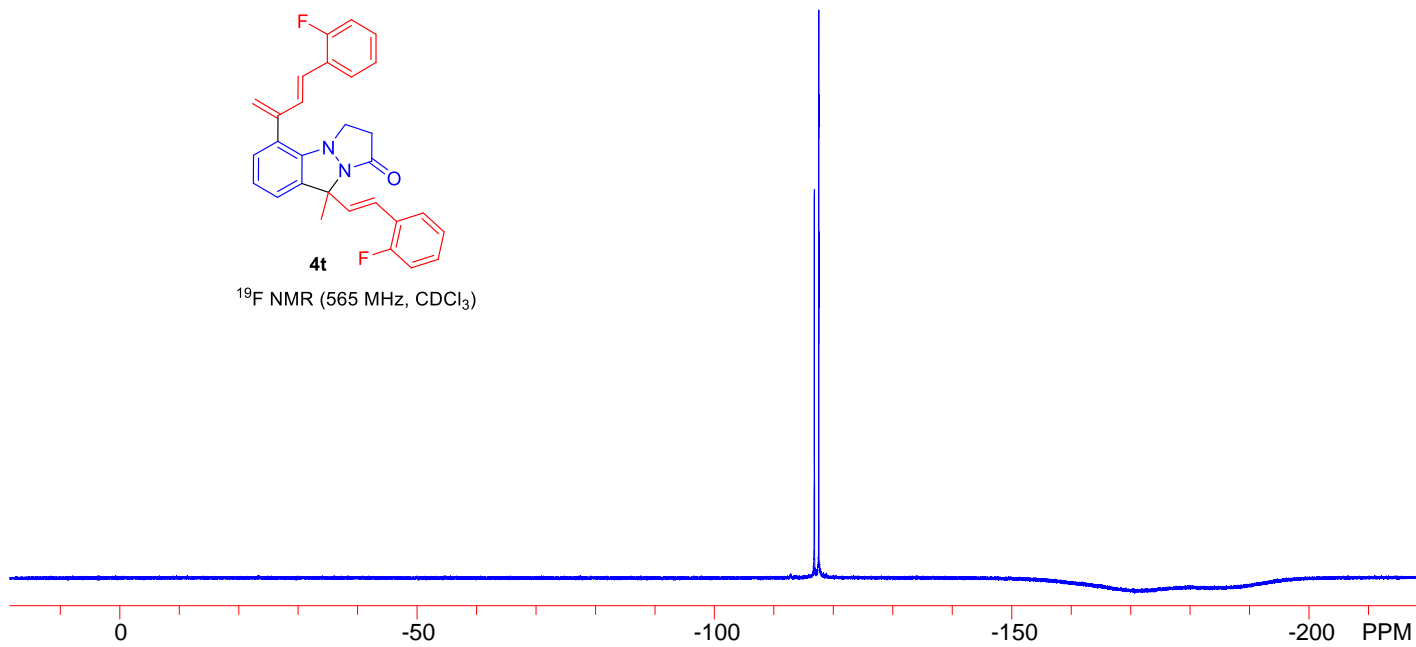

## VII. NMR spectra of 5a-5d

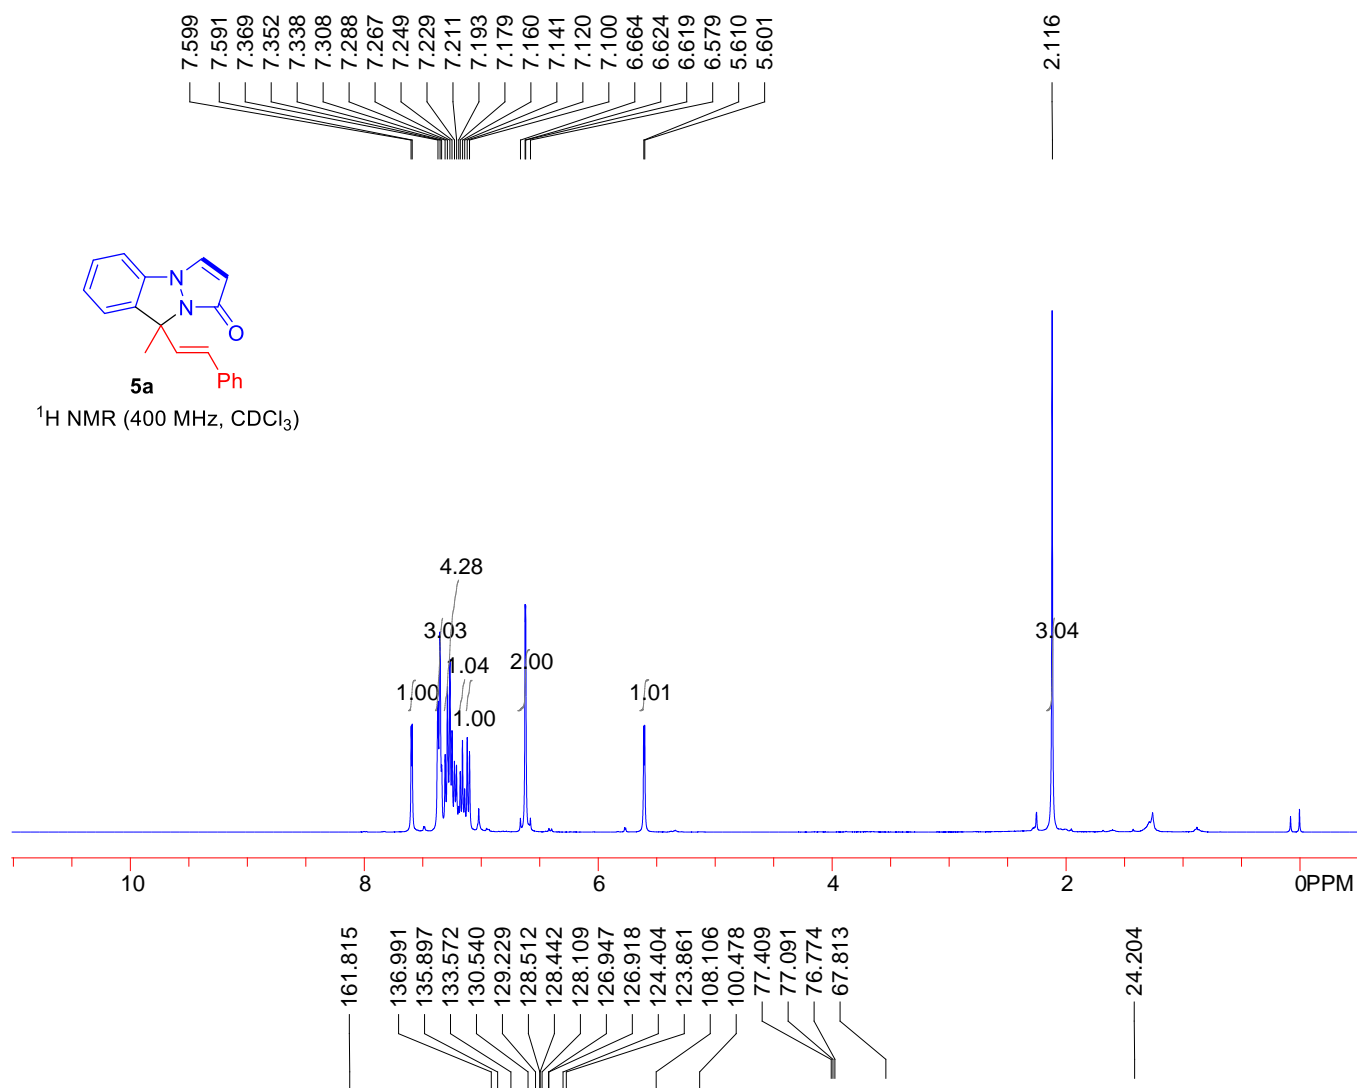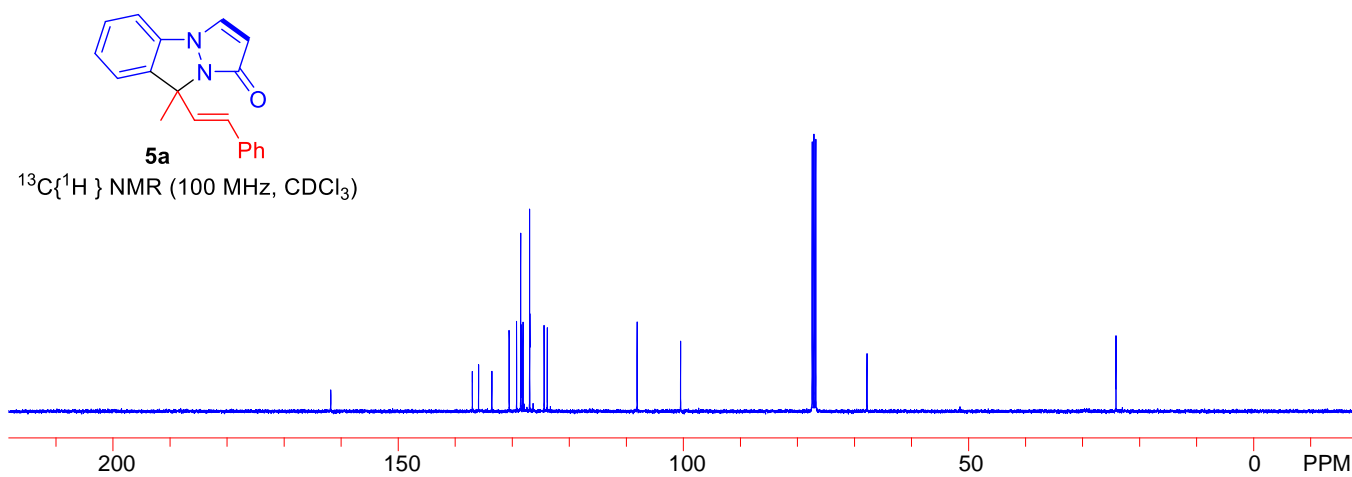

7.548  
7.542  
7.375  
7.363  
7.282  
7.270  
7.264  
7.257  
7.225  
7.213  
7.201  
7.153  
7.139  
7.087  
7.001  
6.988  
6.643  
6.616  
6.606  
6.580  
5.571  
5.565

2.378  
2.098

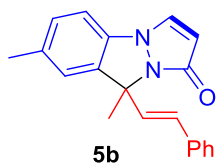

$^1\text{H}$  NMR (600 MHz,  $\text{CDCl}_3$ )

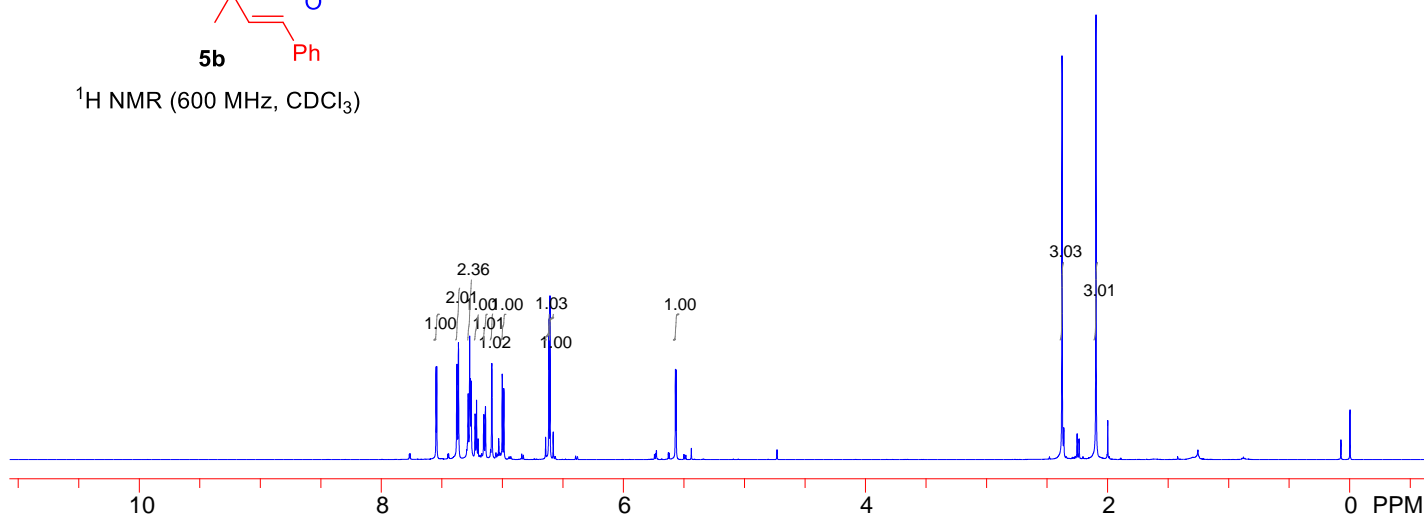

161.862  
137.271  
135.971  
134.455  
131.435  
130.412  
129.660  
128.601  
128.504  
128.065  
126.954  
126.701  
124.303  
107.823  
99.820  
77.297  
77.085  
76.873  
67.721  
24.095  
21.248

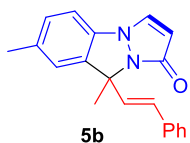

$^{13}\text{C}\{^1\text{H}\}$  NMR (150 MHz,  $\text{CDCl}_3$ )

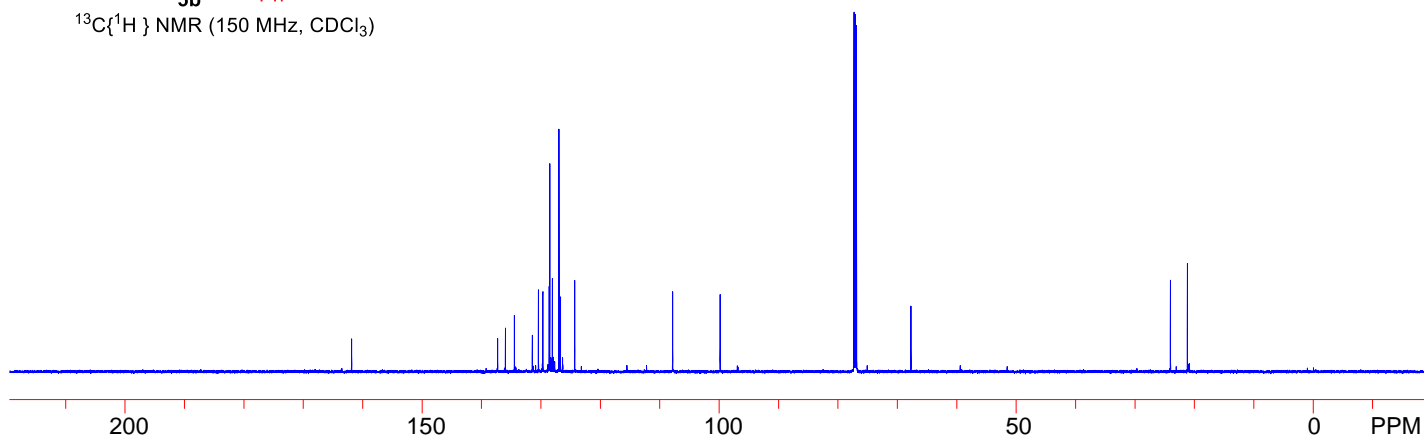

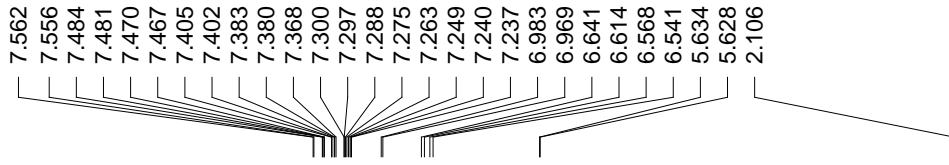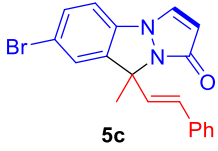

$^1\text{H}$  NMR (600 MHz,  $\text{CDCl}_3$ )

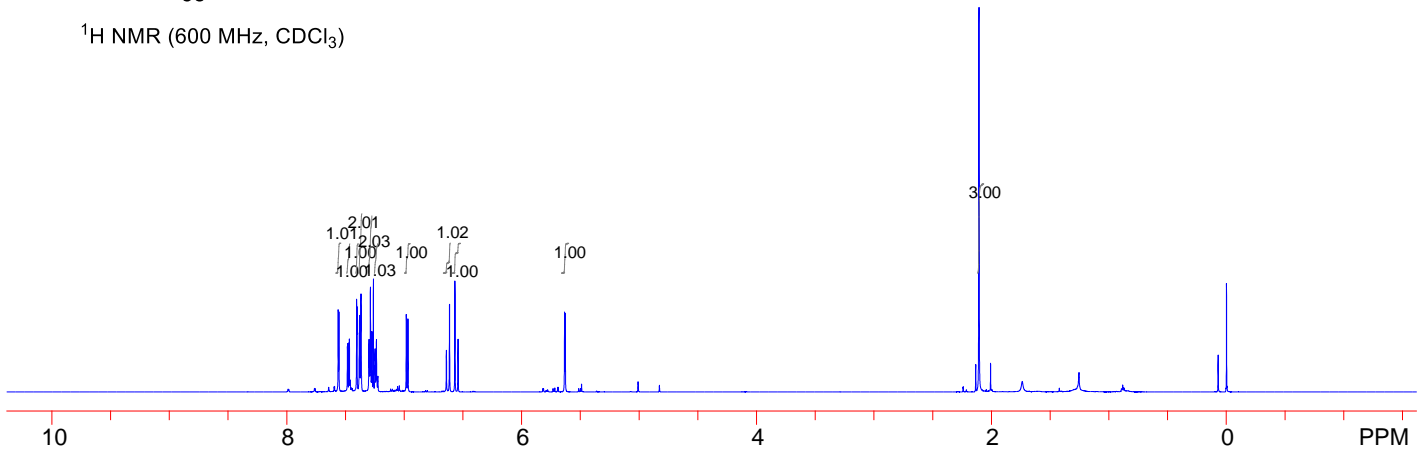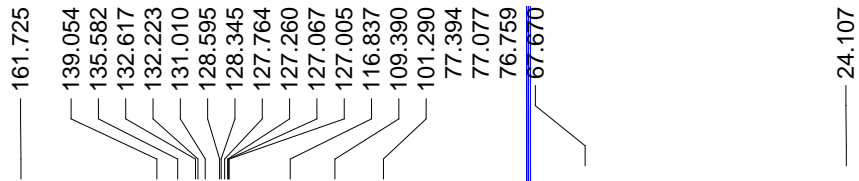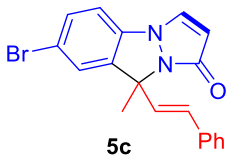

$^{13}\text{C}\{^1\text{H}\}$  NMR (100 MHz,  $\text{CDCl}_3$ )

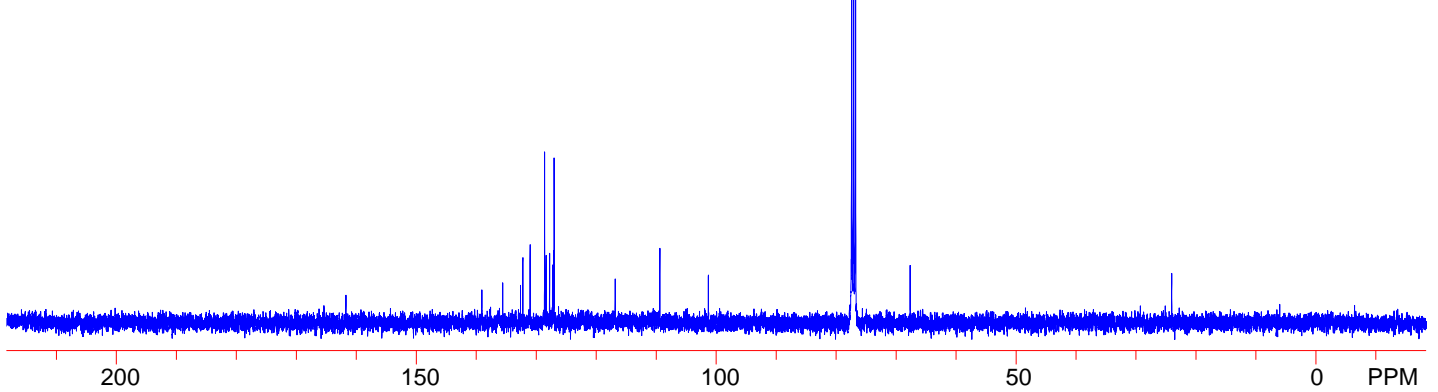

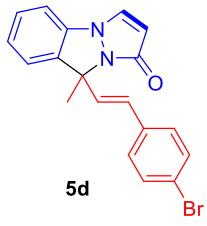

<sup>1</sup>H NMR (600 MHz, CDCl<sub>3</sub>)

7.594  
7.588  
7.377  
7.362  
7.359  
7.346  
7.335  
7.333  
7.284  
7.272  
7.260  
7.214  
7.200  
7.162  
7.150  
7.137  
7.106  
7.093  
6.614  
6.587  
6.558  
6.531  
5.589  
5.583  
2.088

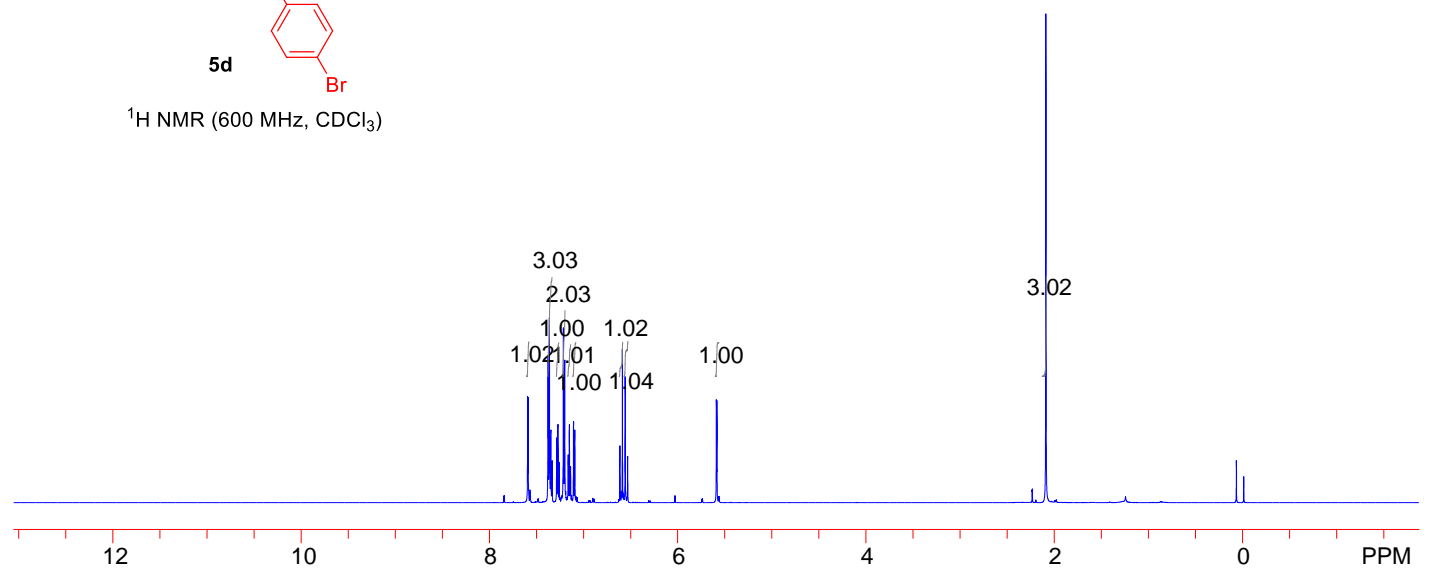

161.838  
136.760  
134.901  
133.533  
131.627  
129.360  
129.337  
129.226  
128.478  
127.091  
124.472  
123.771  
121.945  
108.172  
100.480  
77.318  
77.107  
76.896  
67.682  
24.147

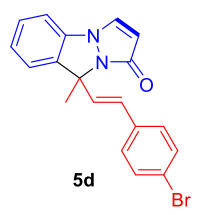

<sup>13</sup>C{<sup>1</sup>H} NMR (150 MHz, CDCl<sub>3</sub>)

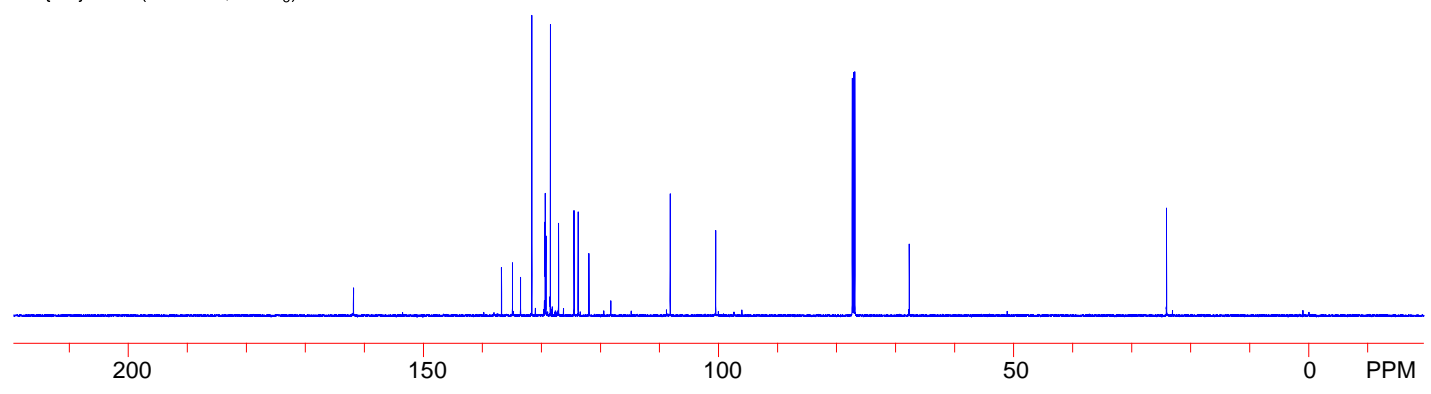

## VIII. NMR spectra of 6a-6e

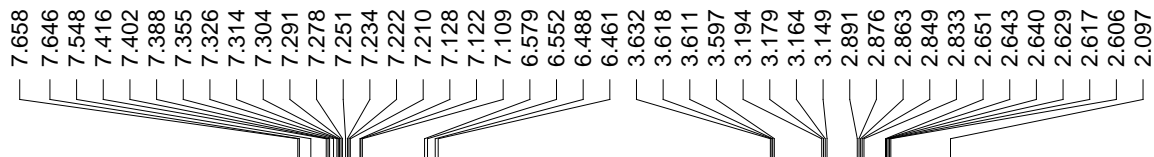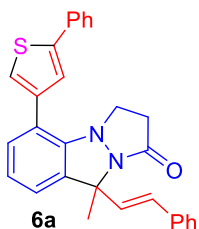

<sup>1</sup>H NMR (600 MHz, CDCl<sub>3</sub>)

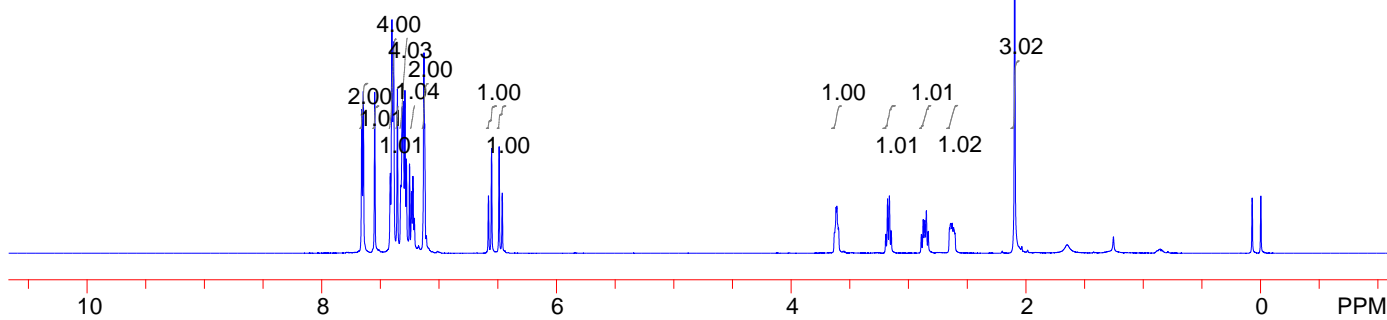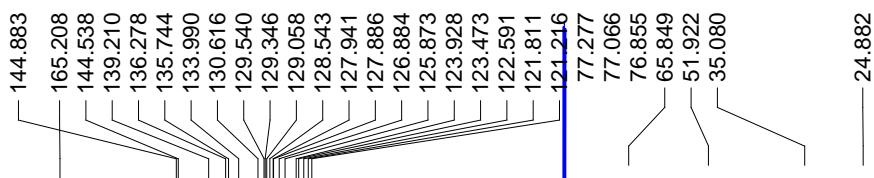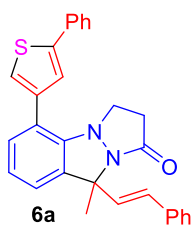

<sup>13</sup>C{<sup>1</sup>H} NMR (150 MHz, CDCl<sub>3</sub>)

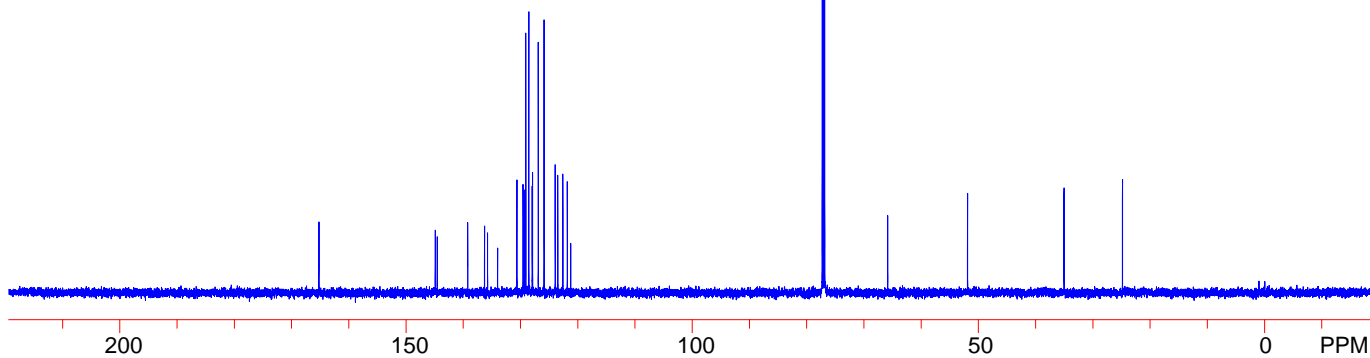



7.661  
7.643  
7.544  
7.542  
7.421  
7.410  
7.404  
7.392  
7.384  
7.348  
7.345  
7.330  
7.312  
7.294  
7.275  
7.253  
7.240  
7.222  
7.204  
7.133  
6.925  
6.602  
6.562  
6.475  
6.435  
3.617  
3.606  
3.595  
3.584  
3.574  
3.562  
3.174  
3.153  
3.128  
3.106  
2.894  
2.873  
2.869  
2.854  
2.847  
2.833  
2.829  
2.807  
2.654  
2.643  
2.634  
2.623  
2.614  
2.603  
2.594  
2.583  
2.375  
2.079

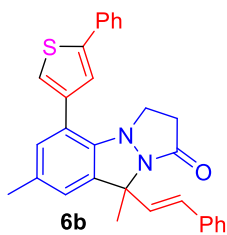

$^1\text{H NMR}$  (400 MHz,  $\text{CDCl}_3$ )

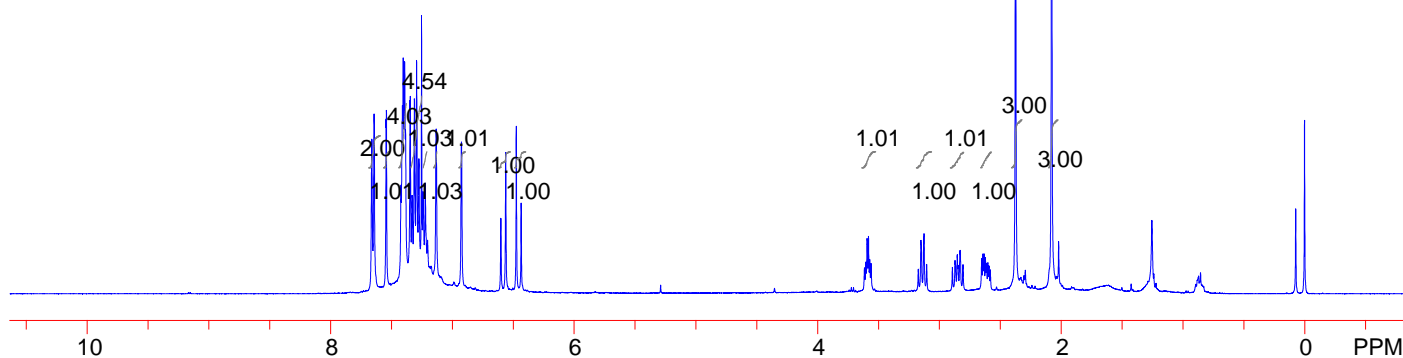

144.809  
165.334  
142.373  
139.299  
136.331  
136.035  
134.023  
133.280  
130.710  
130.046  
129.212  
129.047  
128.528  
127.904  
127.849  
126.885  
125.867  
123.923  
122.465  
122.316  
120.999  
77.270  
77.059  
76.848  
65.854  
52.321  
35.159  
24.822  
20.980

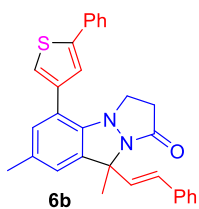

$^{13}\text{C}\{^1\text{H}\}$  NMR (100 MHz,  $\text{CDCl}_3$ )

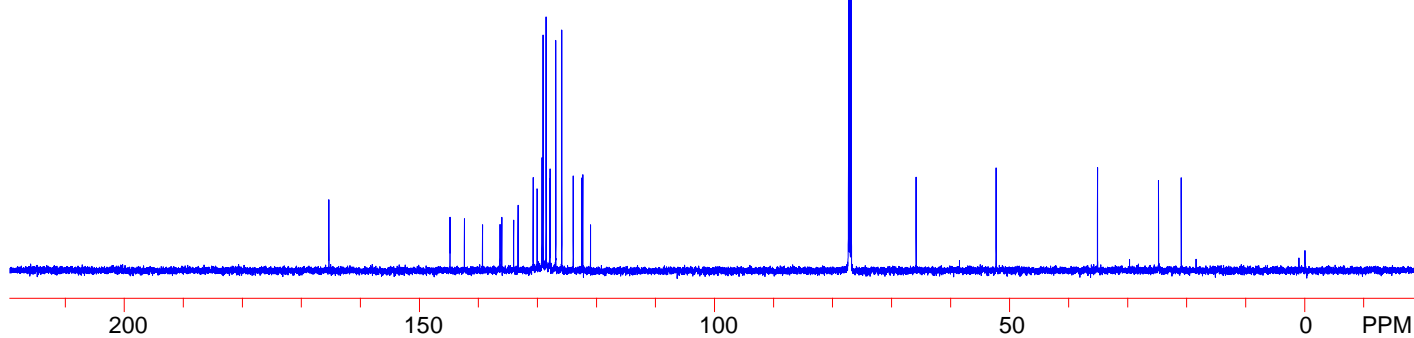

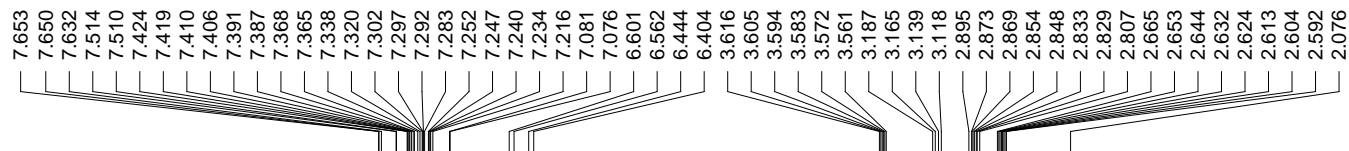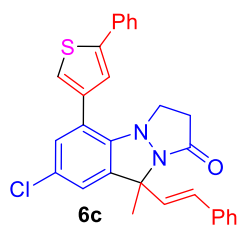

$^1\text{H}$  NMR (400 MHz,  $\text{CDCl}_3$ )

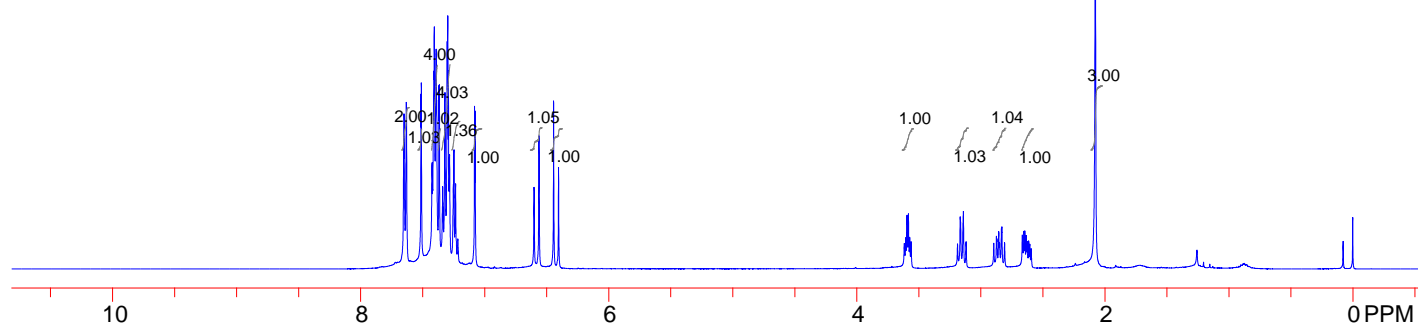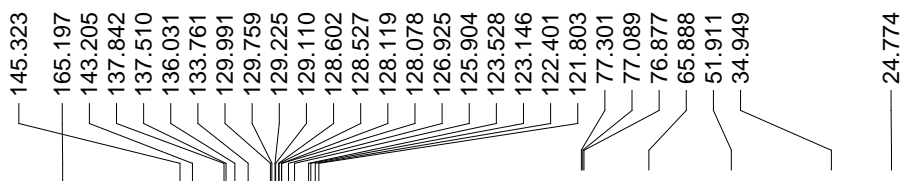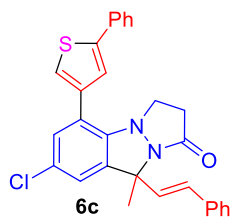

$^{13}\text{C}\{^1\text{H}\}$  NMR (150 MHz,  $\text{CDCl}_3$ )

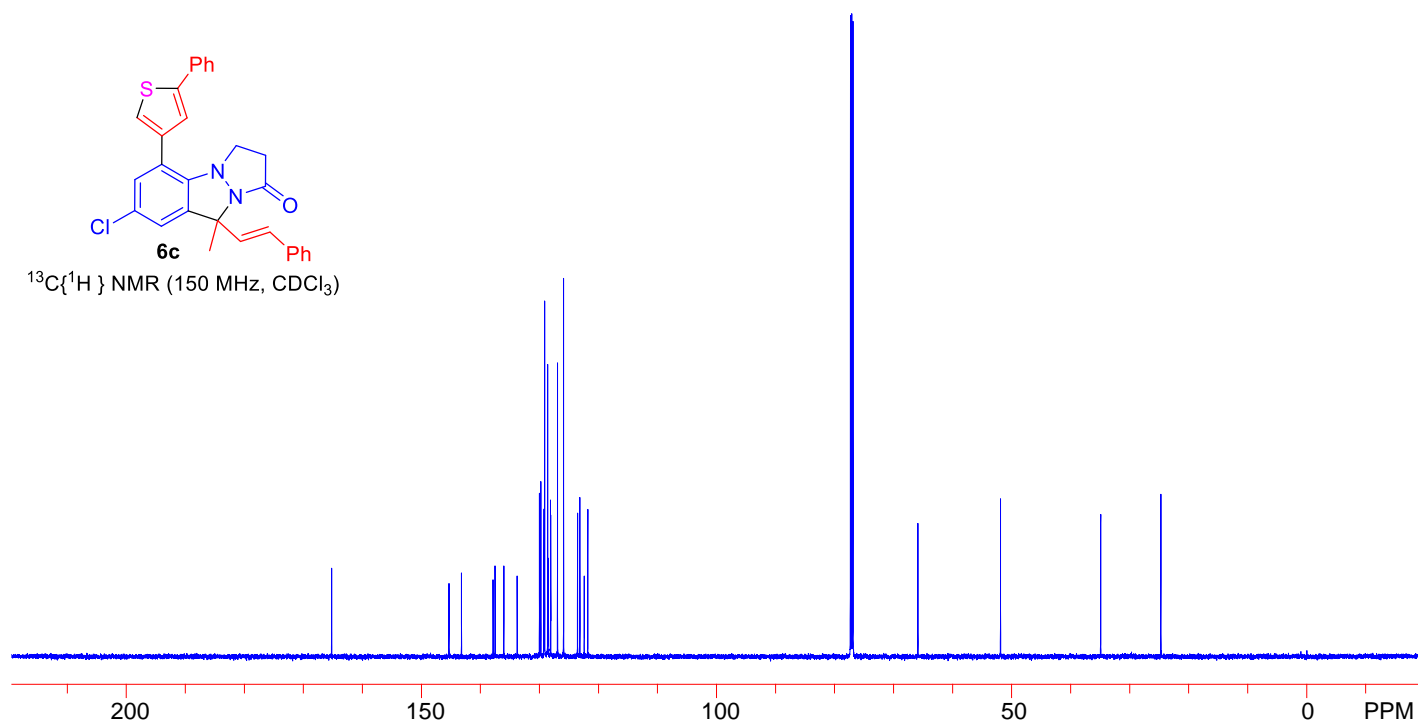

7.545  
7.531  
7.499  
7.497  
7.309  
7.307  
7.301  
7.298  
7.292  
7.286  
7.273  
7.245  
7.210  
7.197  
7.120  
7.113  
7.107  
7.103  
7.100  
7.087  
6.535  
6.508  
6.434  
6.407  
3.626  
3.618  
3.611  
3.604  
3.596  
3.589  
3.182  
3.167  
3.150  
3.135  
2.877  
2.863  
2.860  
2.850  
2.845  
2.836  
2.833  
2.819  
2.637  
2.630  
2.624  
2.616  
2.611  
2.603  
2.597  
2.590  
2.373  
2.313  
2.083

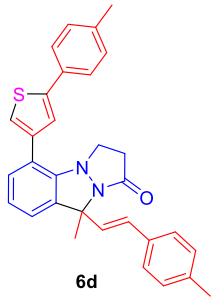

$^1\text{H NMR}$  (600 MHz,  $\text{CDCl}_3$ )

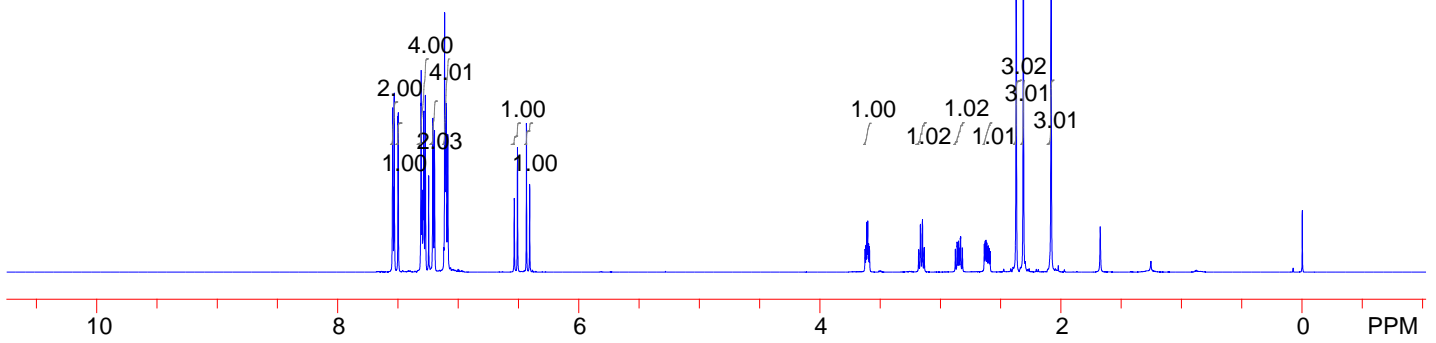

165.156  
144.983  
144.513  
139.139  
137.883  
137.702  
135.824  
133.484  
131.238  
129.706  
129.605  
129.475  
129.230  
126.781  
125.770  
123.423  
123.408  
122.050  
121.783  
121.270  
77.385  
77.067  
76.749  
65.864  
51.888  
35.088  
24.926  
21.228

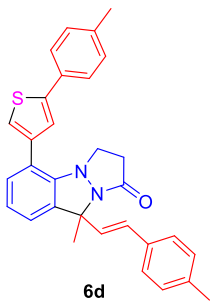

$^{13}\text{C}\{^1\text{H}\}$  NMR (100 MHz,  $\text{CDCl}_3$ )

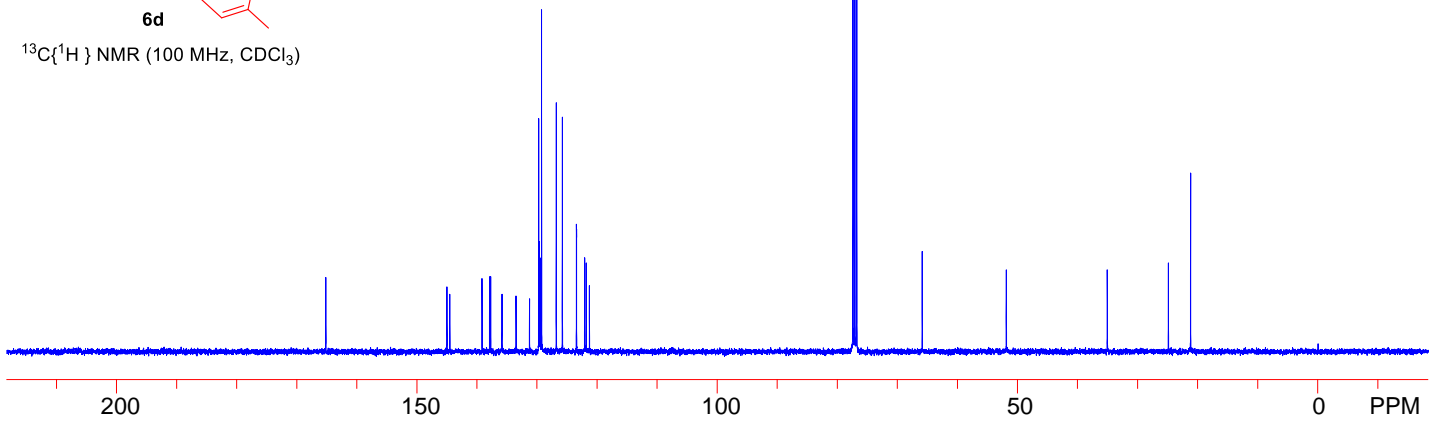

7.535  
7.533  
7.523  
7.520  
7.512  
7.509  
7.488  
7.419  
7.398  
7.374  
7.372  
7.322  
7.312  
7.302  
7.300  
7.291  
7.281  
7.258  
7.254  
7.237  
7.131  
7.128  
7.118  
6.529  
6.489  
6.465  
6.426  
3.629  
3.618  
3.607  
3.596  
3.585  
3.574  
3.194  
3.173  
3.147  
3.125  
2.908  
2.886  
2.882  
2.868  
2.860  
2.846  
2.842  
2.820  
2.666  
2.655  
2.645  
2.634  
2.626  
2.615  
2.605  
2.594  
2.083

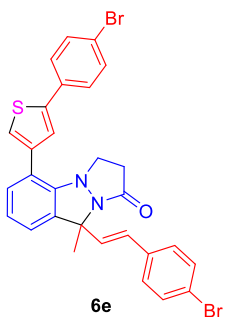

$^1\text{H NMR}$  (400 MHz,  $\text{CDCl}_3$ )

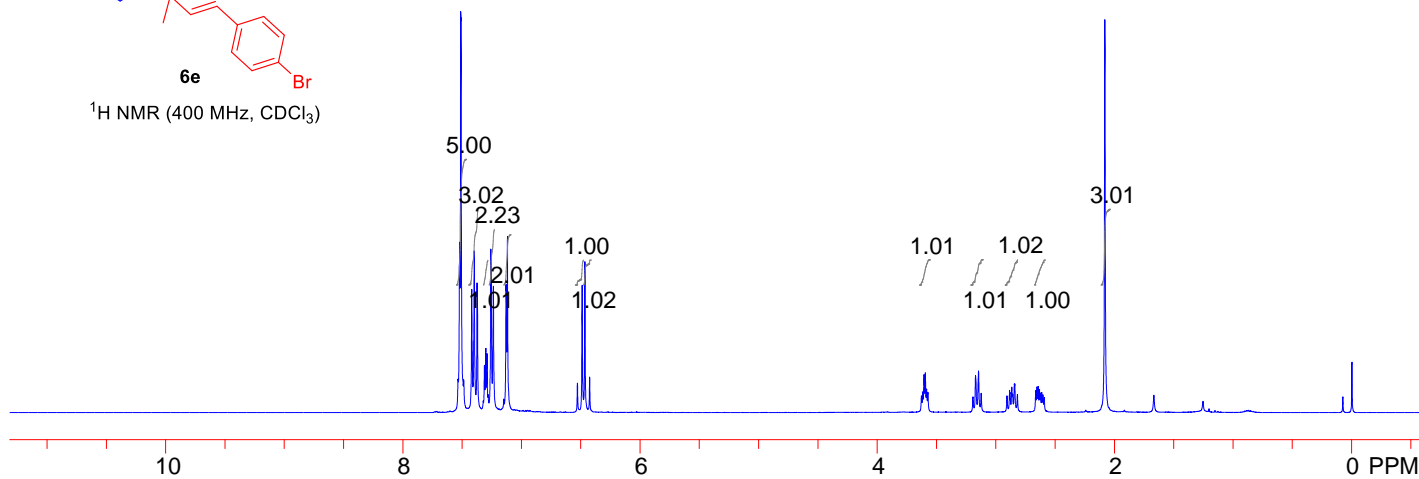

144.505  
165.275  
143.607  
139.338  
135.550  
135.239  
132.917  
132.159  
131.646  
131.395  
129.618  
128.410  
128.210  
127.323  
124.248  
123.590  
122.993  
121.853  
121.832  
121.709  
121.038  
77.396  
77.078  
76.761  
65.807  
51.958  
35.021  
24.844

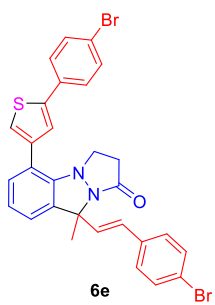

$^{13}\text{C}\{^1\text{H}\}$  NMR (100 MHz,  $\text{CDCl}_3$ )

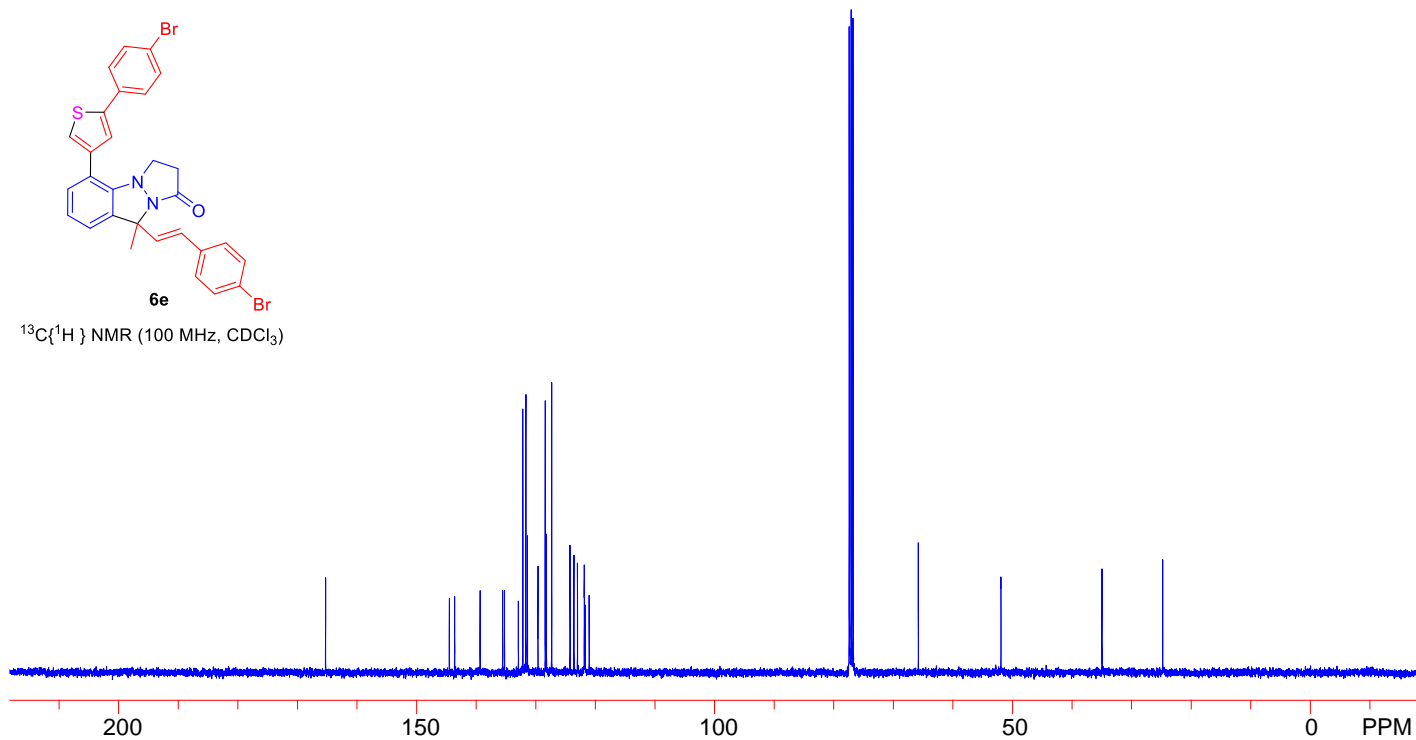

# IX. NMR spectra of 7a-7e

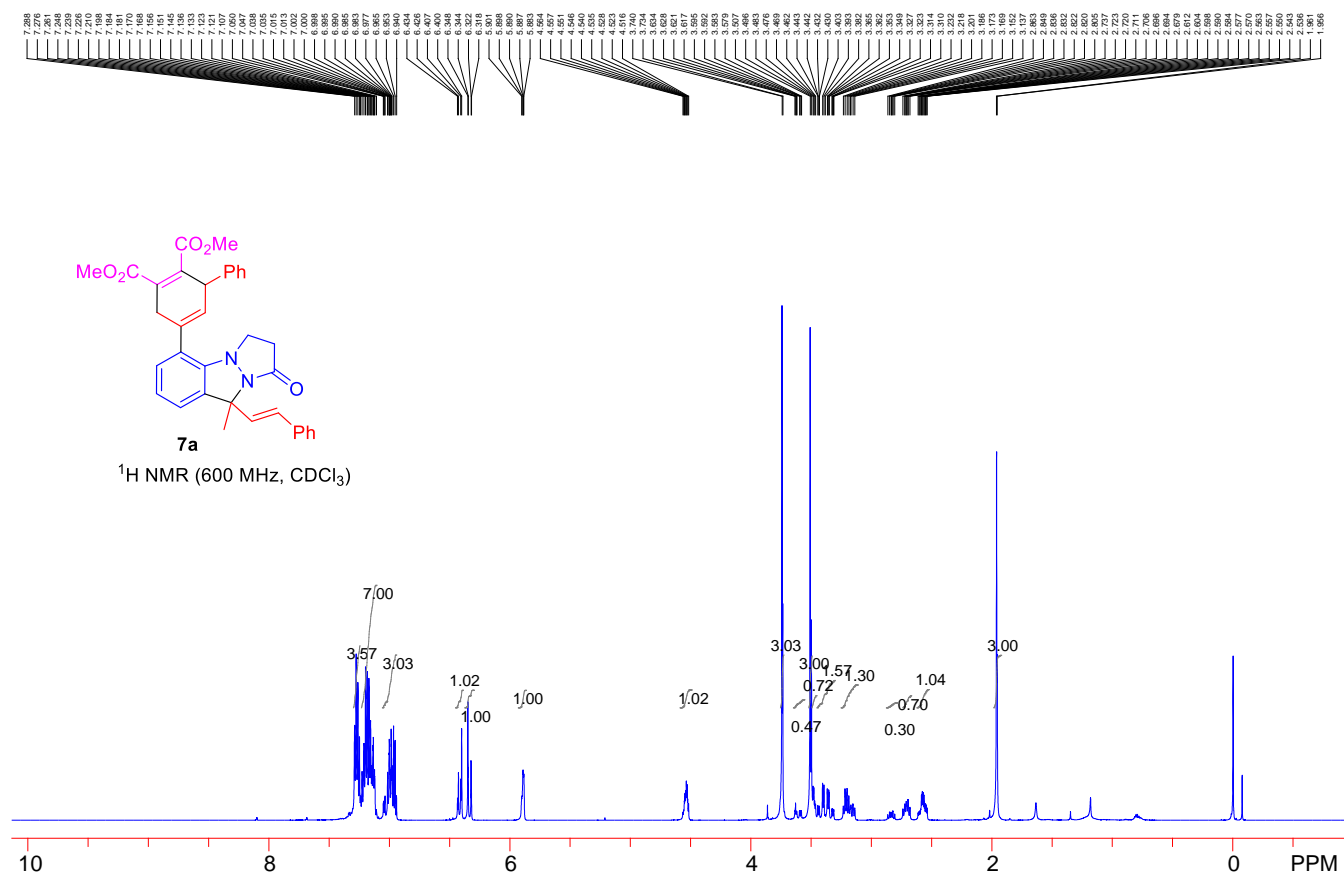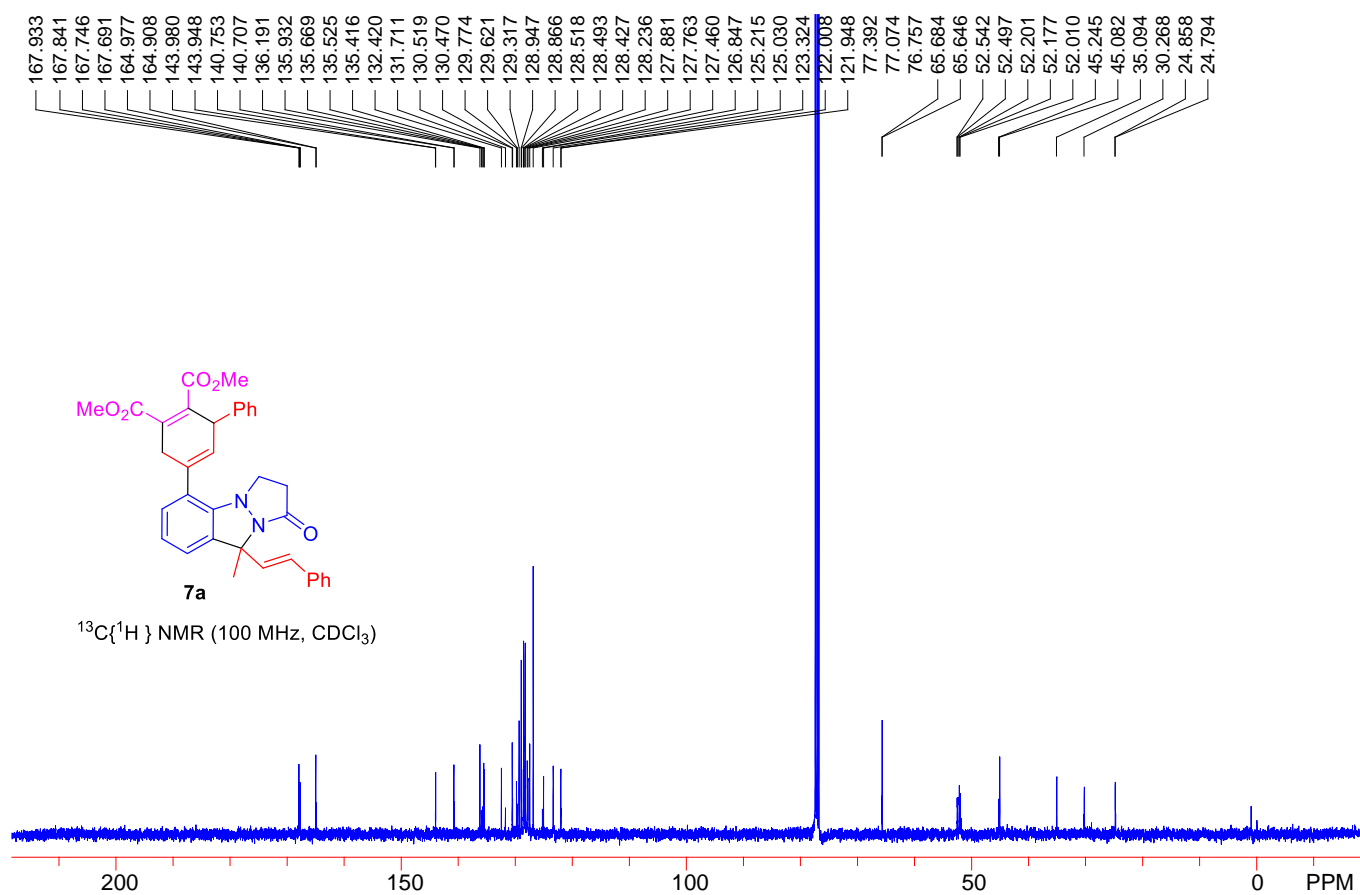

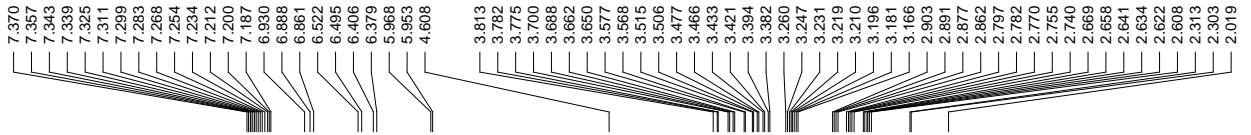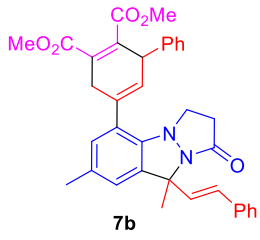

**7b**  
<sup>1</sup>H NMR (600 MHz, CDCl<sub>3</sub>)

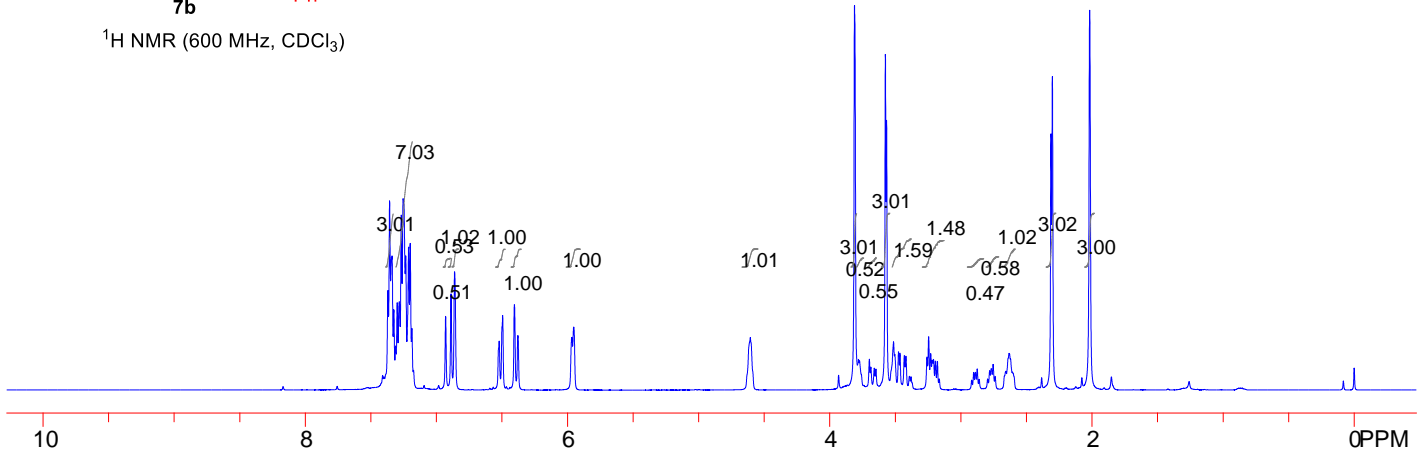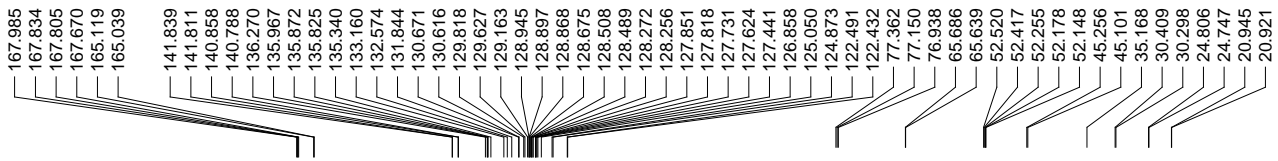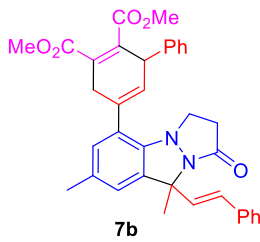

**7b**  
<sup>13</sup>C{<sup>1</sup>H} NMR (150 MHz, CDCl<sub>3</sub>)

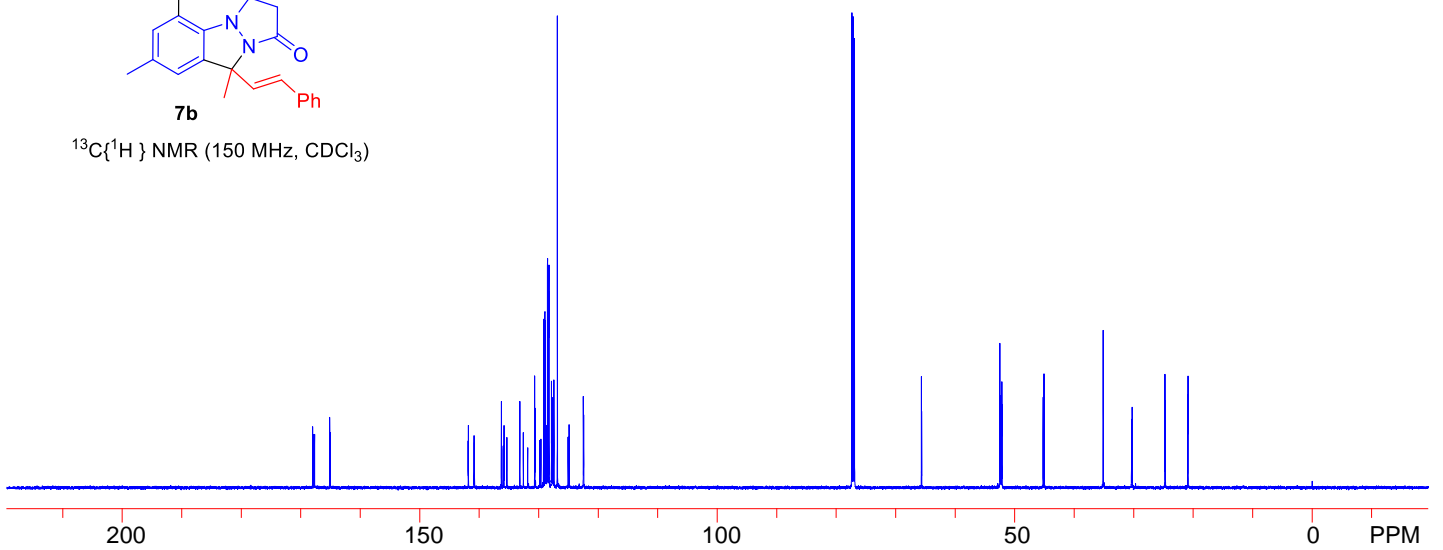

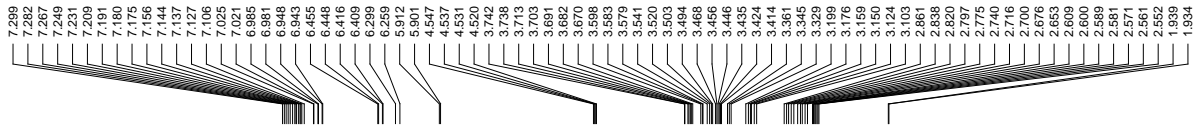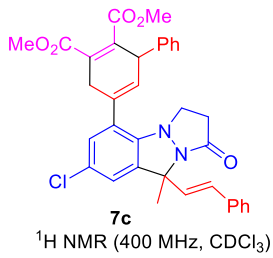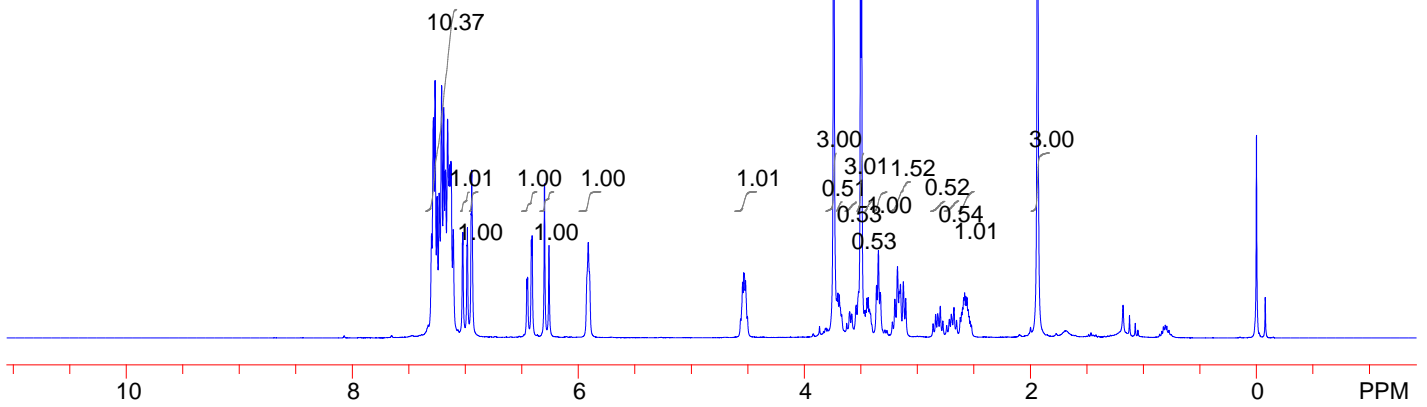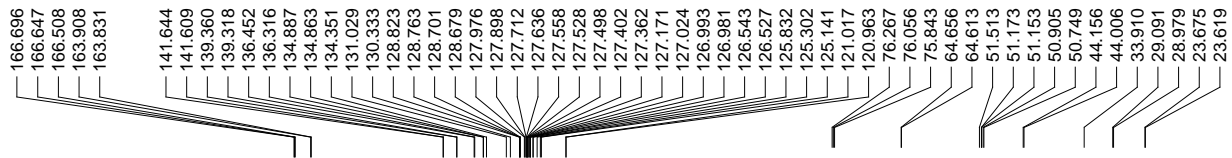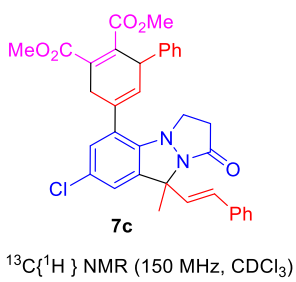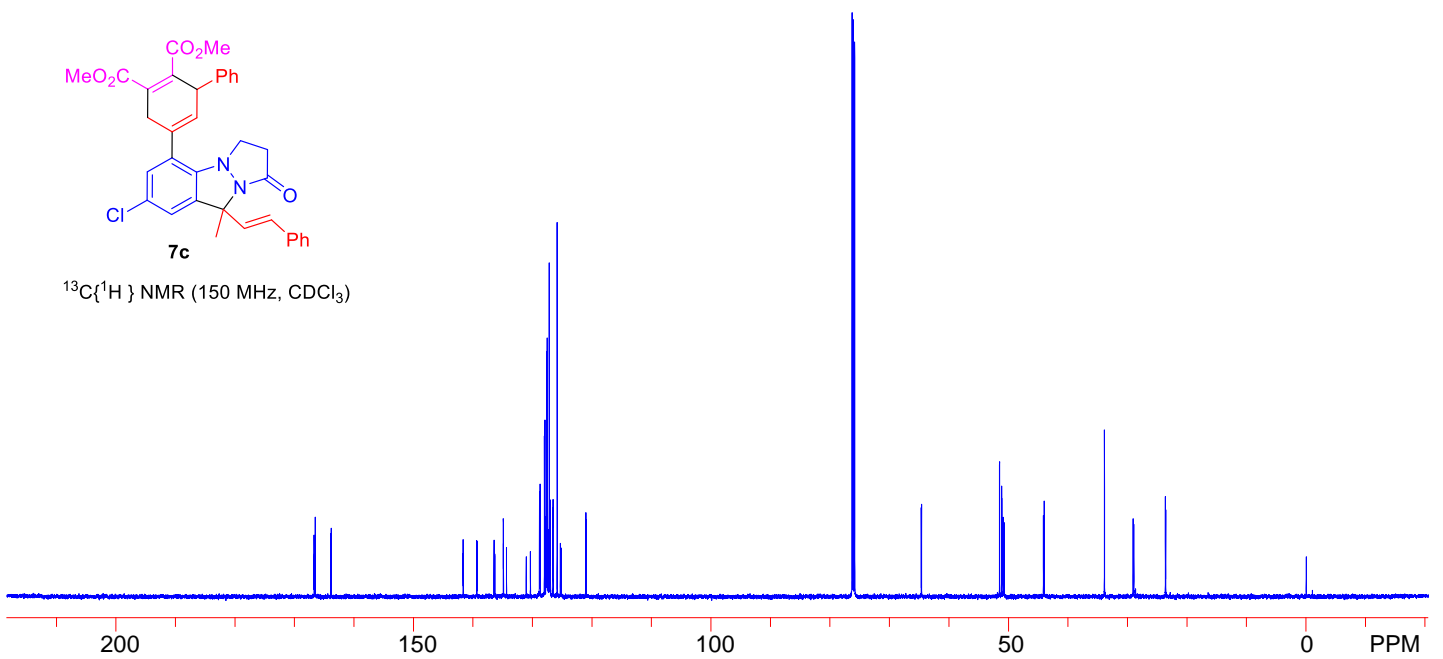

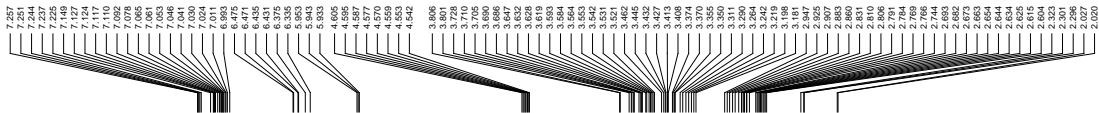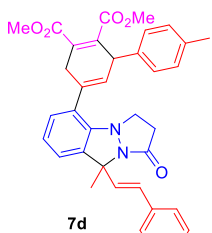

<sup>1</sup>H NMR (400 MHz, CDCl<sub>3</sub>)

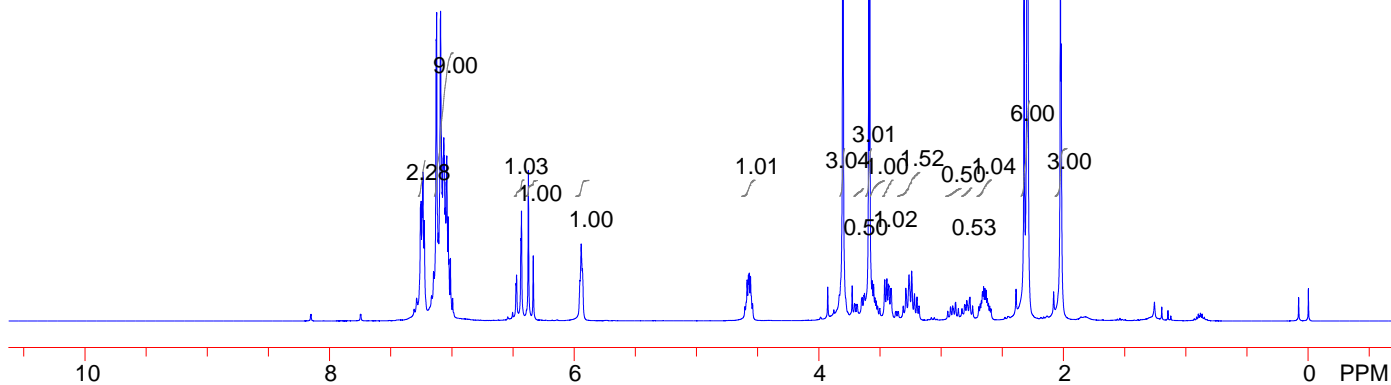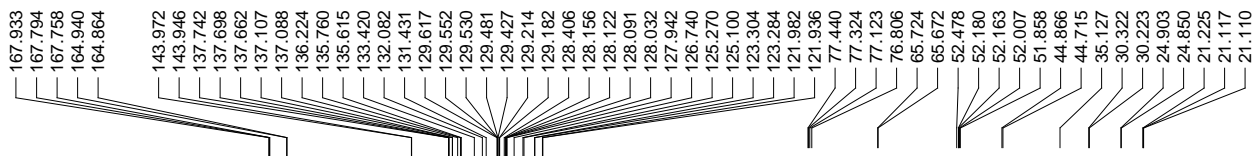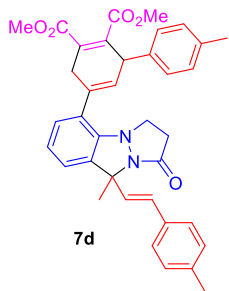

<sup>13</sup>C{<sup>1</sup>H} NMR (100 MHz, CDCl<sub>3</sub>)

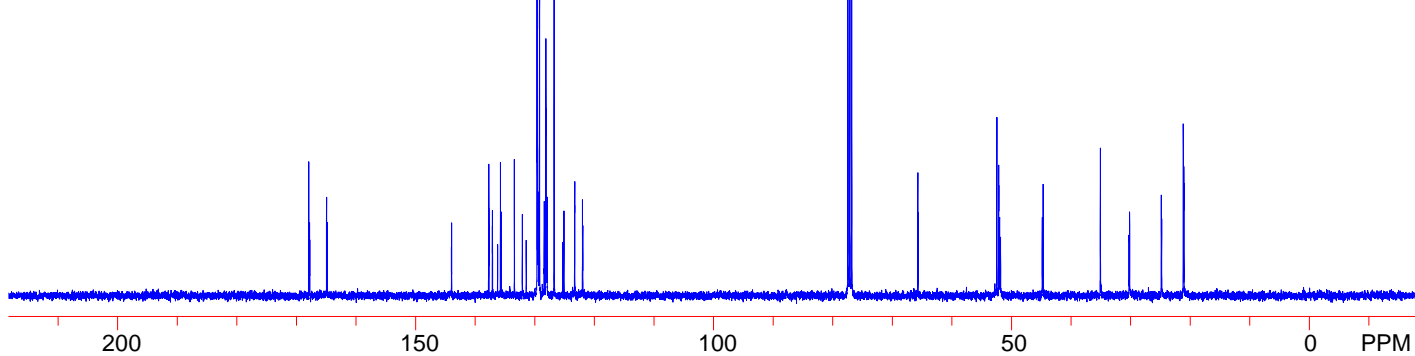



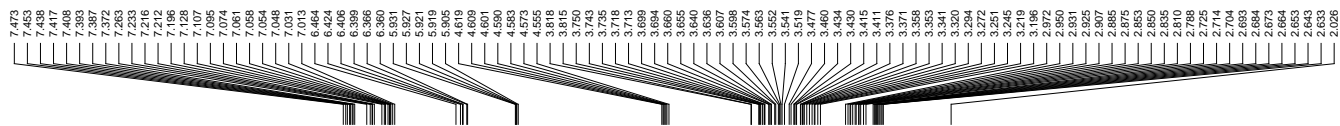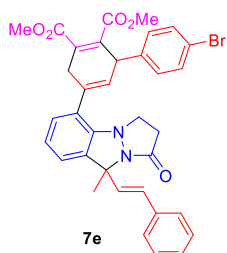

$^1\text{H NMR}$  (400 MHz,  $\text{CDCl}_3$ )

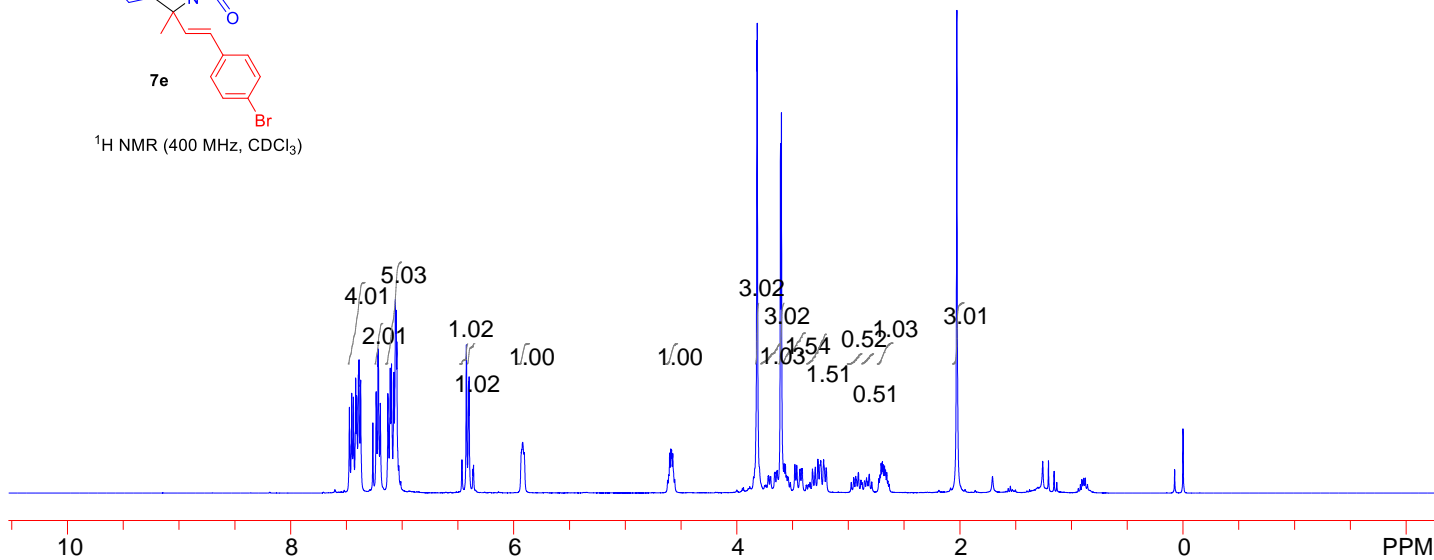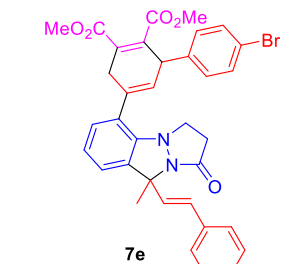

$^{13}\text{C}\{^1\text{H}\}$  NMR (150 MHz,  $\text{CDCl}_3$ )

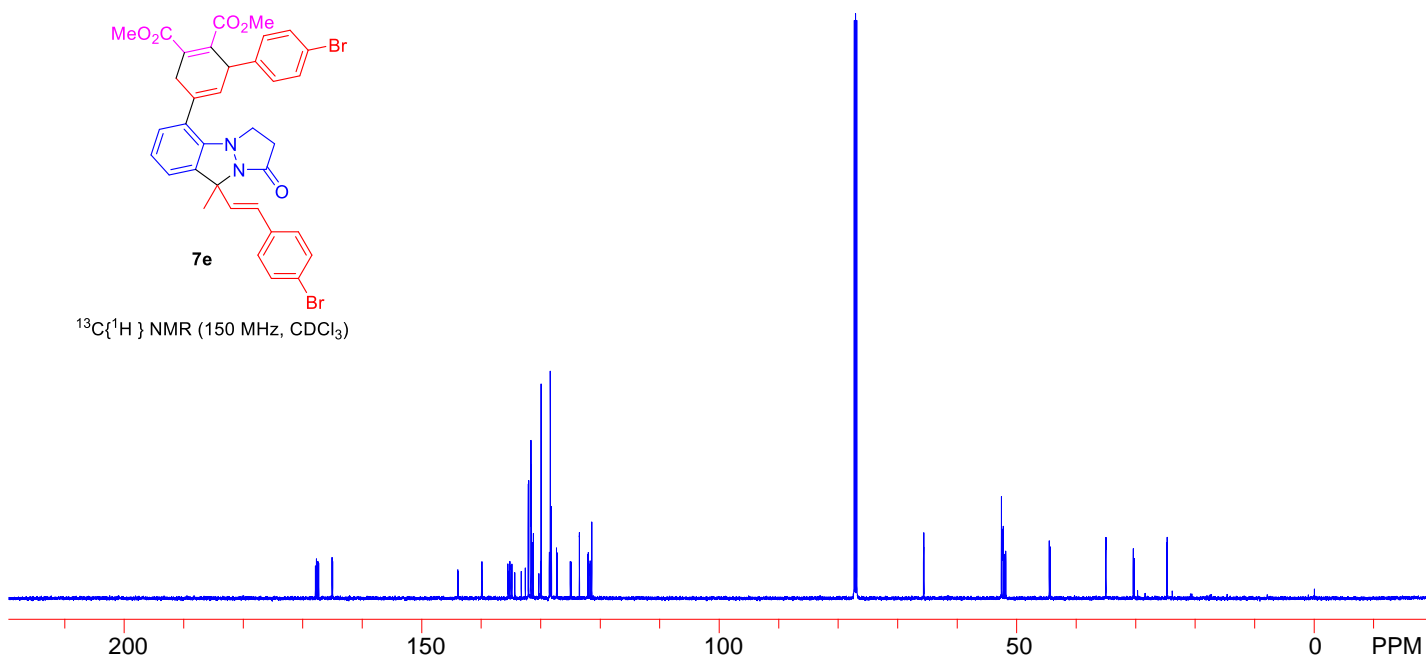

# X. NMR spectra of 8-9

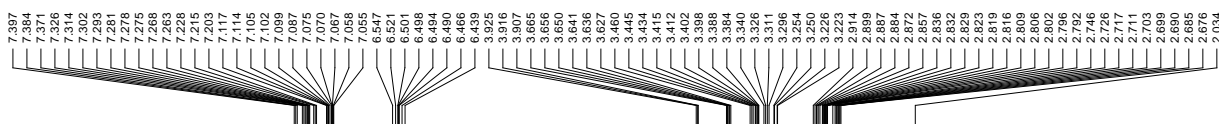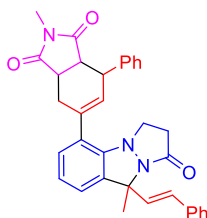

**8-1**

$^1\text{H}$  NMR (600 MHz,  $\text{CDCl}_3$ )

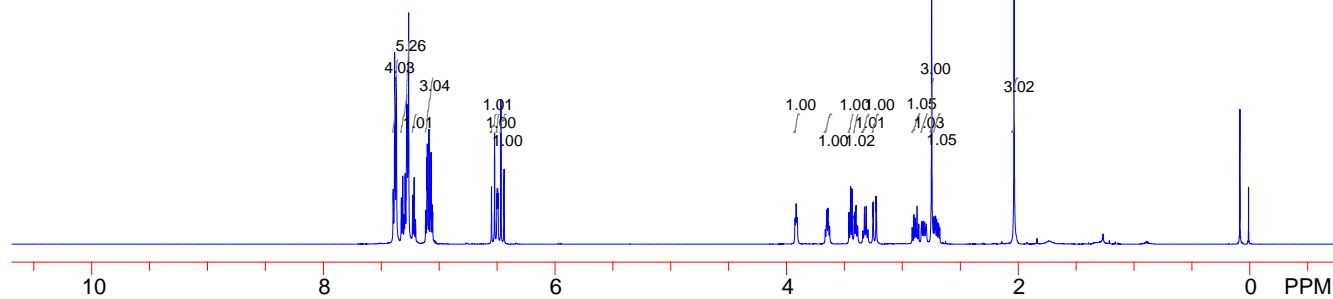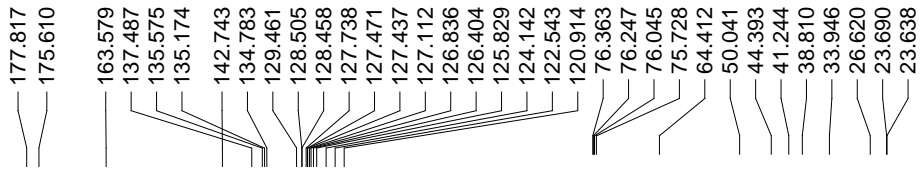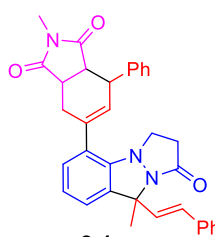

**8-1**

$^{13}\text{C}\{^1\text{H}\}$  NMR (100 MHz,  $\text{CDCl}_3$ )

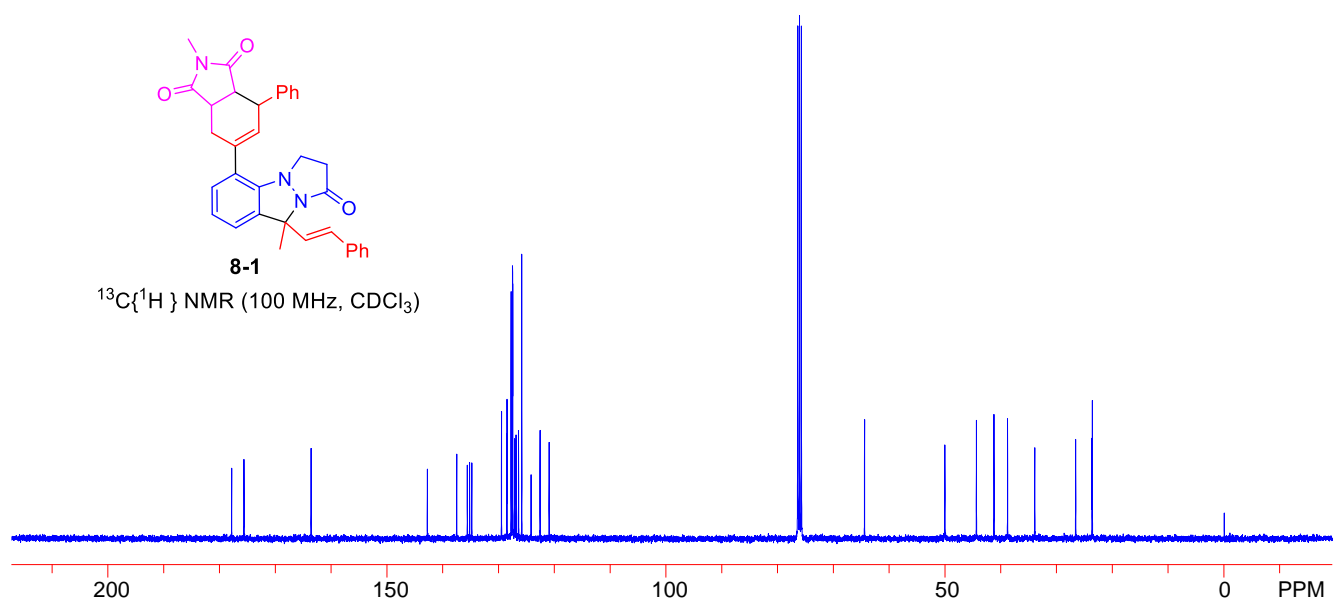

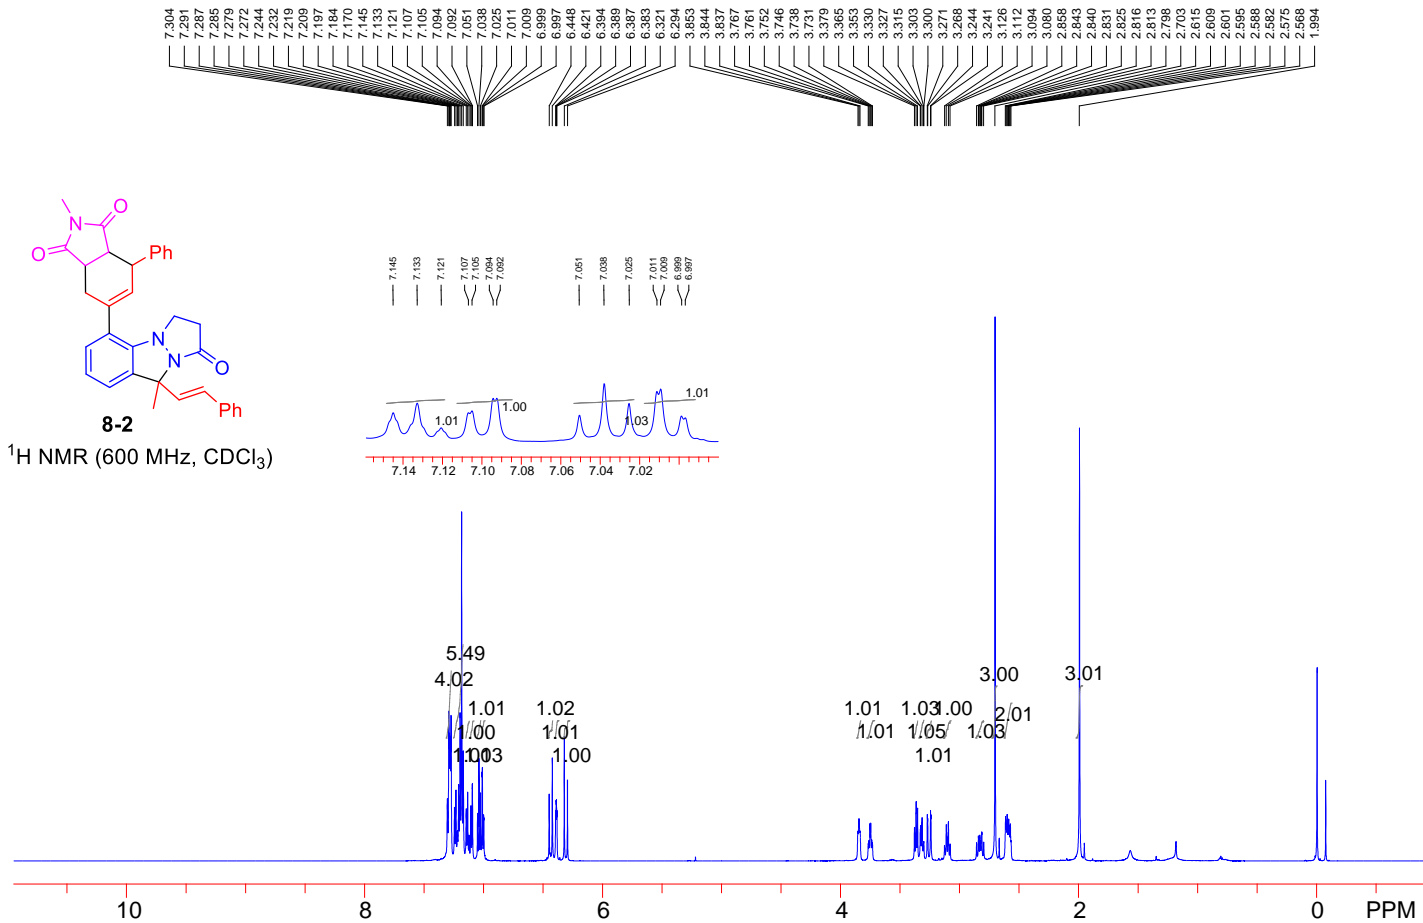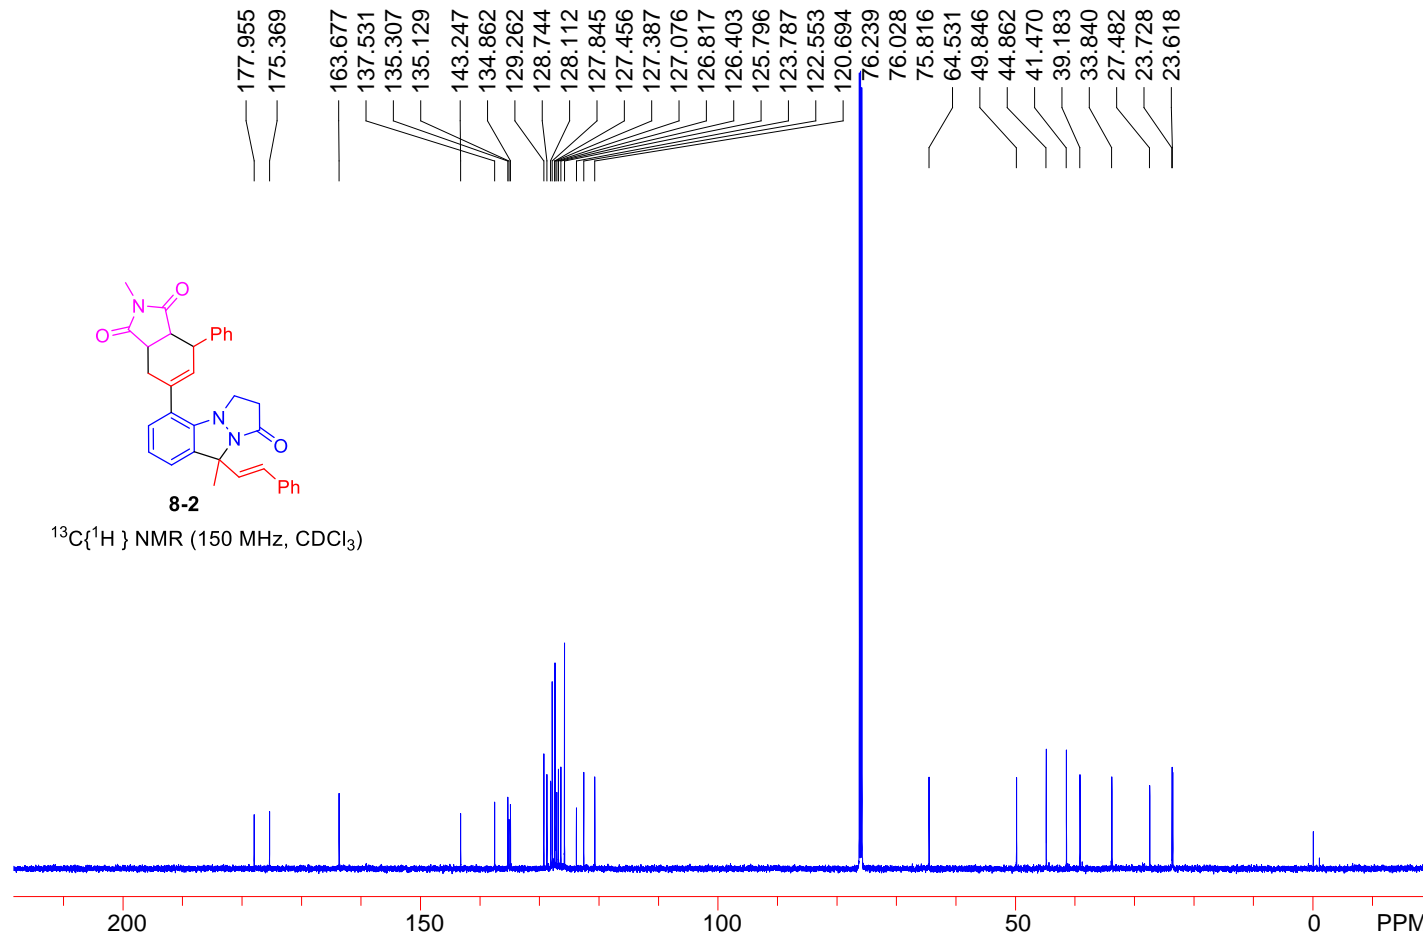

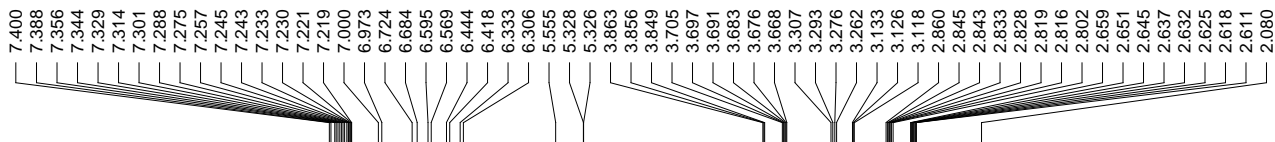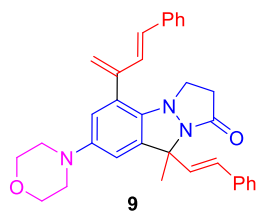

$^1\text{H NMR}$  (600 MHz,  $\text{CDCl}_3$ )

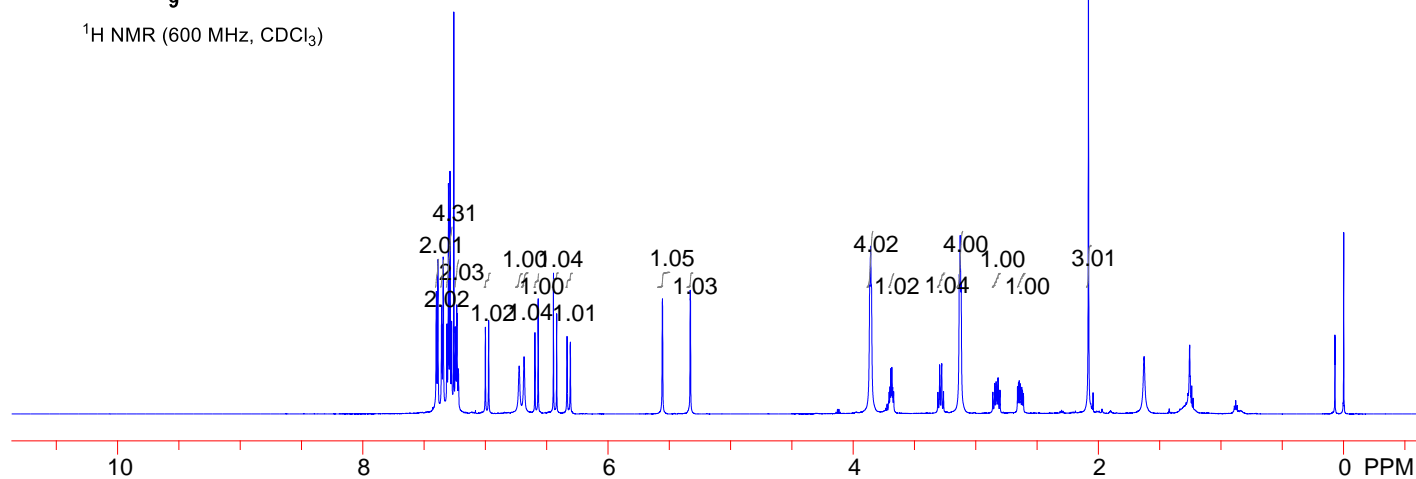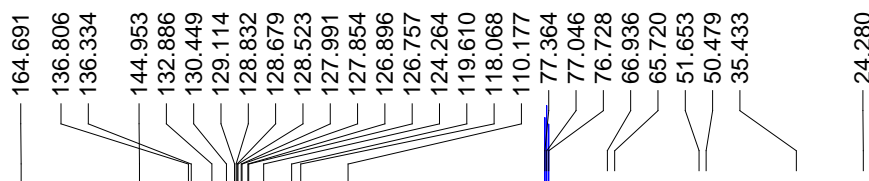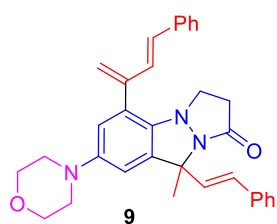

$^{13}\text{C}\{^1\text{H}\}$  NMR (100 MHz,  $\text{CDCl}_3$ )

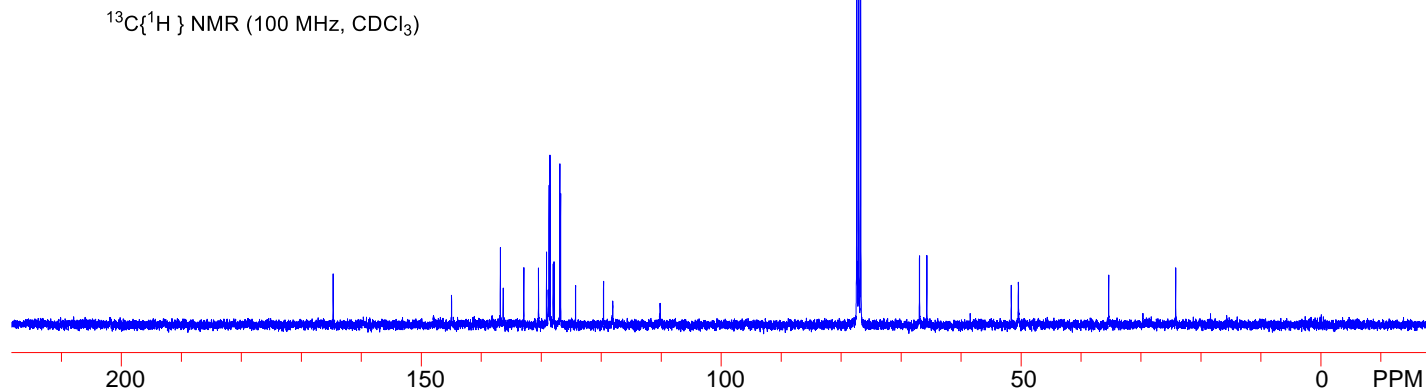

## XI. X-ray crystal structure and data of 3d

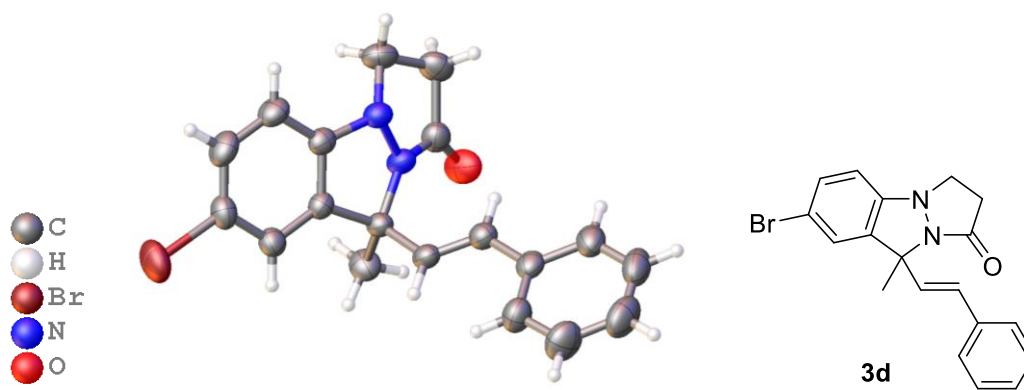

**Figure S1** X-ray crystal structure of **3d** with 50% ellipsoid probability

**X-ray structure determination.** Single crystals suitable for X-ray diffraction were obtained by slow evaporation of the solvent from a dichloromethane solution of **3d**. Crystal data collection and refinement parameters of **3d** are summarized in Table S1. Intensity data were collected at 293 K on a SuperNova Dual diffractometer using mirror-monochromated Cu K $\alpha$  radiation,  $\lambda = 1.54184 \text{ \AA}$ . The data were corrected for decay, Lorentz, and polarization effects as well as absorption and beam corrections based on the multi-scan technique. Using Olex2, the structure was solved with the SHELXS structure solution program using Direct Methods and refined with the SHELXL refinement package using Least Squares minimisation. Nonhydrogen atoms were refined with anisotropic displacement parameters. The H-atoms were either located or calculated and subsequently treated with a riding model.

**Table S1** Crystallographic data and structure refinement results of **3d**

|                        |                                                    |
|------------------------|----------------------------------------------------|
| Empirical formula      | C <sub>19</sub> H <sub>17</sub> BrN <sub>2</sub> O |
| Formula weight         | 369.25                                             |
| Temp, K                | 293(2)                                             |
| Crystal system         | monoclinic                                         |
| Space group            | C2/c                                               |
| <i>a</i> , Å           | 31.6641(9)                                         |
| <i>b</i> , Å           | 7.1775(2)                                          |
| <i>c</i> , Å           | 15.5658(4)                                         |
| $\alpha$ (°)           | 90                                                 |
| $\beta$ (°)            | 102.601(3)                                         |
| $\gamma$ (°)           | 90                                                 |
| Volume, Å <sup>3</sup> | 3452.41(17)                                        |

|                                           |                |
|-------------------------------------------|----------------|
| Z                                         | 8              |
| $\rho_{\text{calc}}$ , g cm <sup>-3</sup> | 1.421          |
| $\lambda$ , Å                             | 1.54184        |
| $\mu$ , mm <sup>-1</sup>                  | 3.283          |
| No. of data collected                     | 7106           |
| No. of unique data                        | 3291           |
| $R_{\text{int}}$                          | 0.0233         |
| Goodness-of-fit on $F^2$                  | 1.127          |
| $R_1$ , $wR_2$ ( $I > 2\sigma(I)$ )       | 0.0511, 0.1304 |
| $R_1$ , $wR_2$ (all data)                 | 0.0601, 0.1361 |
